# Supplementary material
Source: publisher figshare collection journal article supplement (https://acs.figshare.com/ndownloader/files/26256895)
Supplement: Supplementary file 1 [file 26256895]

# Supporting Information

## An "umpolung relay" Strategy: One-pot, Twice Polarity

### Inversion Cascade Synthesis of Diversified

### [60]Fulleroindoles

Xin-Rui Chen,<sup>†</sup> Ying-Meng Li,<sup>†</sup> Xiang Li,<sup>†</sup> Jun Xuan,<sup>†</sup> Hong-Ping Zhou,<sup>†</sup> Yu-Peng Tian<sup>†</sup> and Fei Li<sup>\*,†</sup>

<sup>†</sup>Department of Chemistry, Key Laboratory of Functional Inorganic Materials of Anhui Province, Anhui University, Hefei 230039, PR China

[lfe@ahu.edu.cn](mailto:lfe@ahu.edu.cn)

|                                                                                    |         |
|------------------------------------------------------------------------------------|---------|
| 1. Experimental Procedures and Spectral Data of <b>2a-5lj</b>                      | S3-S31  |
| <sup>1</sup> H NMR spectrum and <sup>13</sup> C NMR spectrum of product <b>2a</b>  | S32-S33 |
| <sup>1</sup> H NMR spectrum and <sup>13</sup> C NMR spectrum of product <b>2b</b>  | S33-S34 |
| <sup>1</sup> H NMR spectrum and <sup>13</sup> C NMR spectrum of product <b>2c</b>  | S35-S36 |
| <sup>1</sup> H NMR spectrum and <sup>13</sup> C NMR spectrum of product <b>2d</b>  | S36-S37 |
| <sup>1</sup> H NMR spectrum and <sup>13</sup> C NMR spectrum of product <b>2e</b>  | S38-S39 |
| <sup>1</sup> H NMR spectrum and <sup>13</sup> C NMR spectrum of product <b>3f</b>  | S39-S40 |
| <sup>1</sup> H NMR spectrum and <sup>13</sup> C NMR spectrum of product <b>3g</b>  | S41-S42 |
| <sup>1</sup> H NMR spectrum and <sup>13</sup> C NMR spectrum of product <b>3h</b>  | S42-S43 |
| <sup>1</sup> H NMR spectrum and <sup>13</sup> C NMR spectrum of product <b>3i</b>  | S44-S45 |
| <sup>1</sup> H NMR spectrum and <sup>13</sup> C NMR spectrum of product <b>5ga</b> | S45-S46 |
| <sup>1</sup> H NMR spectrum and <sup>13</sup> C NMR spectrum of product <b>5ha</b> | S47-S48 |
| <sup>1</sup> H NMR spectrum and <sup>13</sup> C NMR spectrum of product <b>5ia</b> | S48-S49 |
| <sup>1</sup> H NMR spectrum and <sup>13</sup> C NMR spectrum of product <b>5ja</b> | S50-S51 |
| <sup>1</sup> H NMR spectrum and <sup>13</sup> C NMR spectrum of product <b>5ka</b> | S51-S52 |
| <sup>1</sup> H NMR spectrum and <sup>13</sup> C NMR spectrum of product <b>5la</b> | S53-S54 |
| <sup>1</sup> H NMR spectrum and <sup>13</sup> C NMR spectrum of product <b>5fa</b> | S54-S55 |
| <sup>1</sup> H NMR spectrum and <sup>13</sup> C NMR spectrum of product <b>5aa</b> | S56-S57 |
| <sup>1</sup> H NMR spectrum and <sup>13</sup> C NMR spectrum of product <b>5gb</b> | S57-S58 |
| <sup>1</sup> H NMR spectrum and <sup>13</sup> C NMR spectrum of product <b>5hb</b> | S59-S60 |
| <sup>1</sup> H NMR spectrum and <sup>13</sup> C NMR spectrum of product <b>5ab</b> | S60-S61 |
| <sup>1</sup> H NMR spectrum and <sup>13</sup> C NMR spectrum of product <b>5hc</b> | S62-S63 |
| <sup>1</sup> H NMR spectrum and <sup>13</sup> C NMR spectrum of product <b>5gc</b> | S63-S64 |
| <sup>1</sup> H NMR spectrum and <sup>13</sup> C NMR spectrum of product <b>5gd</b> | S65-S66 |
| <sup>1</sup> H NMR spectrum and <sup>13</sup> C NMR spectrum of product <b>5hd</b> | S67-S68 |
| <sup>1</sup> H NMR spectrum and <sup>13</sup> C NMR spectrum of product <b>5id</b> | S68-S69 |
| <sup>1</sup> H NMR spectrum and <sup>13</sup> C NMR spectrum of product <b>5ld</b> | S69-S70 |
| <sup>1</sup> H NMR spectrum and <sup>13</sup> C NMR spectrum of product <b>5ae</b> | S71-S72 |
| <sup>1</sup> H NMR spectrum and <sup>13</sup> C NMR spectrum of product <b>5ge</b> | S72-S73 |

|                                                                                                                 |          |
|-----------------------------------------------------------------------------------------------------------------|----------|
| <sup>1</sup> H NMR spectrum and <sup>13</sup> C NMR spectrum of product <b>5he</b>                              | S74-S75  |
| <sup>1</sup> H NMR spectrum and <sup>13</sup> C NMR spectrum of product <b>5ie</b>                              | S75-S76  |
| <sup>1</sup> H NMR spectrum and <sup>13</sup> C NMR spectrum of product <b>5le</b>                              | S77-S78  |
| <sup>1</sup> H NMR spectrum and <sup>13</sup> C NMR spectrum of product <b>5gi</b>                              | S78-S79  |
| <sup>1</sup> H NMR spectrum and <sup>13</sup> C NMR spectrum of product <b>5gf</b>                              | S80-S81  |
| <sup>1</sup> H NMR spectrum and <sup>13</sup> C NMR spectrum of product <b>5gh</b>                              | S82-S83  |
| <sup>1</sup> H NMR spectrum and <sup>13</sup> C NMR spectrum of product <b>5gg</b>                              | S83-S84  |
| <sup>1</sup> H NMR spectrum and <sup>13</sup> C NMR spectrum of product <b>5ij</b>                              | S85-S86  |
| <sup>1</sup> H NMR spectrum and <sup>13</sup> C NMR spectrum of product <b>5hj</b>                              | S87-S88  |
| <sup>1</sup> H NMR spectrum and <sup>13</sup> C NMR spectrum of product <b>5lj</b>                              | S89-S90  |
| 2. Single-Crystal X-Ray Crystallography of <b>2d</b> , <b>3g</b> , and <b>5aa</b>                               | S91-S95  |
| 3. HPLC Profiles of the reaction mixtures for the synthesis of <b>2a</b> , <b>2e</b> , <b>3g</b> and <b>5ie</b> | S95-S97  |
| 4. Scale-up procedure for synthesis of <b>5ie</b>                                                               | S97-S98  |
| 5. Experimental Procedures of Mechanism Studies                                                                 | S98-S100 |



## 1. Experimental Procedures and Spectral Data of 2a-5lj

### Synthesis of 2a

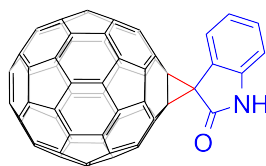

**2a**

C<sub>60</sub> (36.0 mg, 0.05 mmol), indole (7.2 mg, 0.06 mmol), KO<sup>t</sup>Bu (11.2 mg, 0.1 mmol) were dissolved in chlorobenzene (8 mL) at room temperature under Ar atmosphere. Then DMSO (2 mL) was added to the mixture and the color of the solution changed gradually from purple to dark green. After being stirred for 30 minutes, CF<sub>3</sub>SO<sub>3</sub>H (180 μL, 2 mmol) was added to the mixture and the color changed from dark green to yellowish brown. And after being stirred for 10 minutes, DDQ (34 mg, 0.15 mmol) was added to the mixture and stirred in an oil bath at 100 °C for 60 minutes. The mixture was cooled to room temperature and then added 20 mL carbon disulfide. Resulting dark-yellow solution was washed with water and then evaporated in vacuo. The residue was separated on a silica gel column with disulfide/dichloromethane (2:1) as the eluent to give unreacted C<sub>60</sub> (6.0 mg, 17%) and **2a** (15.1 mg, 35%) as black amorphous solid. <sup>1</sup>H NMR (600 MHz, CS<sub>2</sub>/d<sub>6</sub>-DMSO) δ 11.37 (s, N-H, 1H), 8.18 (d, *J* = 7.8 Hz, 1H), 7.42 (td, *J* = 7.8, 1.2 Hz, 1H), 7.16 (d, *J* = 7.8 Hz, 1H), 7.12 (td, *J* = 7.8, 1.2 Hz, 1H); <sup>13</sup>C NMR (150 MHz, CS<sub>2</sub>/d<sub>6</sub>-DMSO) (all 2C unless indicated) δ 169.25(1C, carbonyl C), 145.3, 144.9, 144.4, 144.35, 144.29, 144.27, 144.25(1C), 144.2, 144.0, 143.9, 143.81, 143.80, 143.7, 143.6(1C), 143.5, 143.4, 143.0, 142.7, 142.31, 142.28, 142.2, 142.1, 142.0, 141.5, 141.4(4C), 140.9, 140.5, 140.3, 140.0, 138.0(1C, aryl C), 128.8(1C, aryl C), 124.6(1C, aryl C), 122.9(1C, aryl C), 121.0(1C, aryl C), 110.1(1C, aryl C), 75.0(*sp*<sup>3</sup>-C of C<sub>60</sub>), 42.2(1C); HRMS (MALDI-TOF-MS, DCTB as matrix, negative mode): *m/z* [M]<sup>-</sup> calcd for C<sub>68</sub>H<sub>5</sub>NO 851.0371; found 851.0376.

### Synthesis of 2b

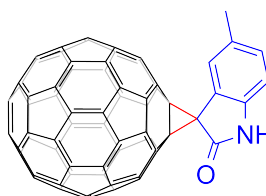

**2b**

C<sub>60</sub> (36.0 mg, 0.05 mmol), 5-methylindole (8 mg, 0.06 mmol), KO<sup>t</sup>Bu (11.2 mg, 0.1 mmol) were dissolved in chlorobenzene (8 mL) at room temperature under Ar atmosphere. Then DMSO (2 mL) was added to the mixture and the color of the solution changed gradually from purple to dark green. After being stirred for 30 minutes, CF<sub>3</sub>SO<sub>3</sub>H (180 μL, 2 mmol) was added to the mixture and the color changed from dark green to yellowish brown. And after being stirred for 10 minutes, DDQ (56 mg, 0.25 mmol) was added to the mixture and stirred in an oil bath at 100 °C for 60

minutes. The mixture was cooled to room temperature and then added 20 mL carbon disulfide. Resulting dark-yellow solution was washed with water and then evaporated in vacuo. The residue was separated on a silica gel column with carbon disulfide/dichloromethane (1:1) as the eluent to give unreacted C<sub>60</sub> (7.1 mg, 20%) and **2b** (27.8 mg, 64%) as black amorphous solid. <sup>1</sup>H NMR (600 MHz, CS<sub>2</sub>/d<sub>6</sub>-DMSO) δ 11.26 (s, N-H, 1H), 7.98 (s, 1H), 7.22 (d, *J* = 6.0 Hz, 1H), 7.04 (dd, *J* = 7.8, 3.6 Hz, 1H), 2.50 (s, 3H); <sup>13</sup>C NMR (150 MHz, CS<sub>2</sub>/d<sub>6</sub>-DMSO) (all 2C unless indicated) δ 169.3(1C, carbonyl C), 145.5, 144.9, 144.5, 144.38, 144.35, 144.3(4C), 144.2, 144.1, 143.9, 143.8, 143.8, 143.7, 143.6(1C), 143.5, 143.4, 143.0, 142.8, 142.4(1C), 142.32(1C), 142.27, 142.2, 142.1, 141.6, 141.49, 141.45, 141.0, 140.5, 140.4, 140.0, 139.9(1C), 138.0(1C, aryl C), 129.9(1C, aryl C), 129.3(1C, aryl C), 124.8(1C, aryl C), 123.6(1C, aryl C), 109.9(1C, aryl C), 75.1(*sp*<sup>3</sup>-C of C<sub>60</sub>), 42.2(1C), 21.1(1C, -CH<sub>3</sub>); HRMS (MALDI-TOF-MS, DCTB as matrix, negative mode): *m/z* [M]<sup>-</sup> calcd for C<sub>69</sub>H<sub>7</sub>NO 865.0528; found 865.0532.

### Synthesis of 2c

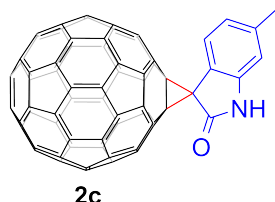

C<sub>60</sub> (36.0 mg, 0.05 mmol), 6-methylindole (8 μL, 0.06 mmol), KO<sup>t</sup>Bu (11.2 mg, 0.1 mmol) were dissolved in chlorobenzene (8 mL) at room temperature under Ar atmosphere. Then DMSO (2 mL) was added to the mixture and the color of the solution changed gradually from purple to dark green. After being stirred for 30 minutes, CF<sub>3</sub>SO<sub>3</sub>H (45 μL, 0.5 mmol) was added to the mixture and the color changed from dark green to yellowish brown. And after being stirred for 10 minutes, DDQ (56 mg, 0.25 mmol) was added to the mixture and stirred in an oil bath at 100 °C for 60 minutes. The mixture was cooled to room temperature and then added 20 mL carbon disulfide. Resulting dark-yellow solution was washed with water and then evaporated in vacuo. The residue was separated on a silica gel column with carbon disulfide/dichloromethane (2:1) as the eluent to give unreacted C<sub>60</sub> (3.3 mg, 9%) and **2c** (10.2 mg, 24%) as black amorphous solid. <sup>1</sup>H NMR (400 MHz, CS<sub>2</sub>/d<sub>6</sub>-DMSO) δ 11.29 (s, N-H, 1H), 8.04 (d, *J* = 8.0 Hz, 1H), 6.98 (s, 1H), 6.92 (d, *J* = 8.0 Hz, 1H), 2.50 (s, 3H); <sup>13</sup>C NMR (100 MHz, CS<sub>2</sub>/d<sub>6</sub>-DMSO) (all 2C unless indicated) δ 169.6(1C, carbonyl C), 145.6, 144.9, 144.5, 144.4, 144.33, 144.31, 144.30, 144.21, 144.17, 143.9, 143.8(4C), 143.73, 143.66(1C), 143.5, 143.4, 143.0, 142.8, 142.4(1C), 142.4(1C), 142.34(1C), 142.26, 142.2, 142.1, 141.5, 141.5, 141.4, 140.9, 140.5, 140.4, 140.1, 138.7 (1C, aryl C), 138.0(1C, aryl C), 122.7(1C, aryl C), 121.8(1C, aryl C), 121.6(1C, aryl C), 111.0(1C, aryl C), 75.1(*sp*<sup>3</sup>-C of C<sub>60</sub>), 42.3(1C), 21.3(1C, -CH<sub>3</sub>); HRMS (MALDI-TOF-MS, DCTB as matrix, negative mode): *m/z* [M]<sup>-</sup> calcd for C<sub>69</sub>H<sub>7</sub>NO 865.0528; found 865.0530.

## Synthesis of 2d

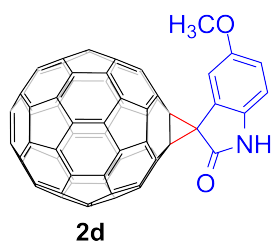

C<sub>60</sub> (36.0 mg, 0.05 mmol), 5-methoxyindole (9 mg, 0.06 mmol), KO<sup>t</sup>Bu (11.2 mg, 0.1 mmol) were dissolved in chlorobenzene (8 mL) at room temperature under Ar atmosphere. Then DMSO (2 mL) was added to the mixture and the color of the solution changed gradually from purple to dark green. After being stirred for 30 minutes, CF<sub>3</sub>SO<sub>3</sub>H (180 μL, 2 mmol) was added to the mixture and the color changed from dark green to yellowish brown. And after being stirred for 10 minutes, DDQ (56 mg, 0.25 mmol) was added to the mixture and stirred in an oil bath at 100 °C for 60 minutes. The mixture was cooled to room temperature and then added 20 mL carbon disulfide. Resulting dark-yellow solution was washed with water and then evaporated in vacuo. The residue was separated on a silica gel column with carbon disulfide/dichloromethane (2:1) as the eluent to give unreacted C<sub>60</sub> (8.1 mg, 23%) and **2d** (21.1 mg, 48%) as black amorphous solid. <sup>1</sup>H NMR (600 MHz, CS<sub>2</sub>/d<sub>6</sub>-DMSO) δ 11.17 (s, N-H, 1H), 7.75 (d, *J* = 3.0 Hz, 1H), 7.04 (d, *J* = 8.4 Hz, 1H), 6.95 (dd, *J* = 8.4, 2.4 Hz, 1H), 3.85 (s, 3H); <sup>13</sup>C NMR (150 MHz, CS<sub>2</sub>/d<sub>6</sub>-DMSO) (all 2C unless indicated) δ 169.24(1C, carbonyl C), 154.3(1C, aryl C), 145.3, 144.9, 144.43, 144.39, 144.33, 144.30, 144.29(1C), 144.2, 144.0, 143.89, 143.86, 143.8, 143.7, 143.6(1C), 143.5, 143.4, 143.0, 142.8, 142.4 (1C), 142.32(1C), 142.27, 142.2, 142.0, 141.6, 141.5, 141.4, 140.9, 140.5, 140.4, 140.0, 137.9, 135.6(1C, aryl C), 125.7 (1C, aryl C), 112.7(1C, aryl C), 111.3(1C, aryl C), 110.1(1C, aryl C), 75.0(*sp*<sup>3</sup>-C of C<sub>60</sub>), 54.9(1C, -OCH<sub>3</sub>), 42.3(1C); HRMS (MALDI-TOF-MS, DCTB as matrix, negative mode): *m/z* [M]<sup>-</sup> calcd for C<sub>69</sub>H<sub>7</sub>NO<sub>2</sub> 881.0477; found 881.0481.

## Synthesis of 2e

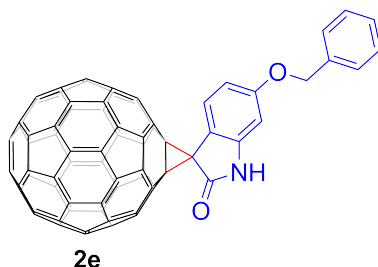

C<sub>60</sub> (36.0 mg, 0.05 mmol), 6-benzyloxyindole (14 mg, 0.06 mmol), KO<sup>t</sup>Bu (11.2 mg, 0.1 mmol) were dissolved in chlorobenzene (8 mL) at room temperature under Ar atmosphere. Then DMSO (2 mL) was added to the mixture and the color of the solution changed gradually from purple to dark green. After being stirred for 30 minutes, CF<sub>3</sub>SO<sub>3</sub>H (180 μL, 2 mmol) was added to the mixture and the color changed from dark green to yellowish brown. And after being stirred for 10 minutes, DDQ (56

mg, 0.25 mmol) was added to the mixture and stirred in an oil bath at 100 °C for 60 minutes. The mixture was cooled to room temperature and then added 20 mL carbon disulfide. Resulting dark-yellow solution was washed with water and then evaporated in vacuo. The residue was separated on a silica gel column with carbon disulfide/dichloromethane (1:1) as the eluent to give unreacted C<sub>60</sub> (12.3 mg, 34%) and **2e** (23.1 mg, 48%) as black amorphous solid. <sup>1</sup>H NMR (400 MHz, CS<sub>2</sub>/d<sub>6</sub>-DMSO) δ 11.31 (s, N-H, 1H), 8.04 (d, *J* = 8.4 Hz, 1H), 7.47 (d, *J* = 7.2 Hz, 2H), 7.39 (t, *J* = 7.2 Hz, 2H), 7.33 (d, *J* = 7.2 Hz, 1H), 6.80 (d, *J* = 2.0 Hz, 1H), 6.68 (dd, *J* = 8.8, 2.4 Hz, 1H), 5.17 (s, 2H); <sup>13</sup>C NMR(100 MHz, CS<sub>2</sub>/d<sub>6</sub>-DMSO) (all 2C unless indicated) δ 169.8(1C, carbonyl C), 159.4(1C, aryl C), 145.7, 145.0(1C, aryl C), 144.5, 144.4, 144.32(4C), 144.27, 144.2(4C), 143.9, 143.8(4C), 143.7, 143.7(1C), 143.6(1C), 143.5, 143.4, 143.0, 142.8, 142.33(1C), 142.32(1C), 142.2, 142.1, 142.0, 141.4(4C), 141.4, 140.9, 140.5, 140.4, 140.1, 137.9, 136.1(1C, aryl C), 127.8(aryl C), 127.2(1C, aryl C), 126.7(aryl C), 123.7(1C, aryl C), 116.8(1C, aryl C), 107.0(1C, aryl C), 97.9(1C, aryl C), 75.2(*sp*<sup>3</sup>-C of C<sub>60</sub>), 69.2(1C, -OCH<sub>2</sub>-), 42.3(1C); HRMS (MALDI-TOF-MS, DCTB as matrix, negative mode): *m/z* [M]<sup>-</sup> calcd for C<sub>75</sub>H<sub>11</sub>O<sub>2</sub>N 957.0790; found 957.0793.

### Synthesis of **3f**

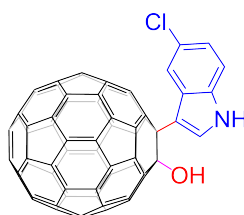

**3f**

C<sub>60</sub> (36.0 mg, 0.05 mmol), 5-chloroindole (9 mg, 0.06 mmol), KO<sup>t</sup>Bu (11.2 mg, 0.1 mmol) were dissolved in chlorobenzene (8 mL) at room temperature under Ar atmosphere. Then DMSO (2 mL) was added to the mixture and the color of the solution changed gradually from purple to dark green. After being stirred for 30 minutes, CF<sub>3</sub>SO<sub>3</sub>H (180 μL, 2 mmol) was added to the mixture and the color changed from dark green to yellowish brown. And after being stirred for 10 minutes, DDQ (56 mg, 0.25 mmol) and H<sub>2</sub>O (36 μL, 2 mmol) were added to the mixture and stirred in an oil bath at 110 °C for 60 minutes. The mixture was cooled to room temperature and then added 20 mL carbon disulfide. Resulting dark-yellow solution was washed with water and then evaporated in vacuo. The residue was separated on a silica gel column with carbon disulfide/dichloromethane (1:1) as the eluent to give unreacted C<sub>60</sub> (5 mg, 14%) and **3f** (17.9 mg, 41%) as black amorphous solid. <sup>1</sup>H NMR (400 MHz, CS<sub>2</sub>/d<sub>6</sub>-DMSO) δ 11.42 (s, N-H, 1H), 8.62 (s, 1H), 7.83.-7.82 (m, 2H), 7.52 (d, *J* = 8.8 Hz, 1H), 7.20 (dd, *J* = 8.8, 1.6 Hz, 1H); <sup>13</sup>C NMR(100 MHz, CS<sub>2</sub>/d<sub>6</sub>-DMSO) (all 2C unless indicated) δ 156.0, 153.8, 147.7(1C), 147.1(1C), 145.8, 145.7, 145.4(4C), 145.2(4C), 145.0(4C), 144.63, 144.62, 144.5, 144.20, 144.18, 142.3, 141.9, 141.82, 141.77, 141.62, 141.58, 141.4, 141.0, 140.6, 139.2, 138.7, 135.4, 134.9, 129.5(1C, aryl C), 126.4(1C, aryl C), 124.40(1C, aryl C), 124.36(1C, aryl C), 121.3(1C, aryl C), 119.9(1C, aryl C), 115.0(1C, aryl C), 112.5(1C, aryl C), 86.1(1C, *sp*<sup>3</sup>-C of C<sub>60</sub>),

65.0(1C,  $sp^3$ -C of  $C_{60}$ ); HRMS (MALDI-TOF-MS, DCTB as matrix, negative mode):  $m/z$   $[M]^-$  calcd for  $C_{68}H_6ClNO$  887.0138; found 887.0142.

### Synthesis of 3g

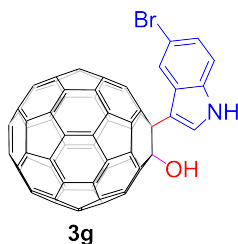

$C_{60}$  (36.0 mg, 0.05 mmol), 5-bromoindole (12 mg, 0.06 mmol), KO<sup>t</sup>Bu (11.2 mg, 0.1 mmol) were dissolved in chlorobenzene (8 mL) at room temperature under Ar atmosphere. Then DMSO (2 mL) was added to the mixture and the color of the solution changed gradually from purple to dark green. After being stirred for 30 minutes,  $CF_3SO_3H$  (180  $\mu$ L, 2 mmol) was added to the mixture and the color changed from dark green to yellowish brown. And after being stirred for 10 minutes, DDQ (56 mg, 0.25 mmol) and  $H_2O$  (36  $\mu$ L, 2 mmol) were added to the mixture and stirred in an oil bath at 110 °C for 60 minutes. The mixture was cooled to room temperature and then added 20 mL carbon disulfide. Resulting dark-yellow solution was washed with water and then evaporated in vacuo. The residue was separated on a silica gel column with carbon disulfide/dichloromethane (1:1) as the eluent to give unreacted  $C_{60}$  (13 mg, 36%) and **3g** (23.2 mg, 50%) as black amorphous solid.  $^1H$  NMR (400 MHz,  $CS_2/d_6$ -DMSO)  $\delta$  11.43 (s, N-H, 1H), 8.76 (s, 1H), 7.82 (s, 1H), 7.81 (d,  $J$  = 2.4 Hz, 1H), 7.48 (d,  $J$  = 8.8 Hz, 1H), 7.32 (dd,  $J$  = 8.4, 1.6 Hz, 1H);  $^{13}C$  NMR(100 MHz,  $CS_2/d_6$ -DMSO) (all 2C unless indicated)  $\delta$  156.0, 153.8, 147.8(1C), 147.1(1C), 145.8, 145.7, 145.4(4C), 145.2(4C), 145.0(4C), 144.64, 144.62, 144.5, 144.20, 144.18, 142.3, 141.9, 141.82, 141.77, 141.62, 141.59, 141.4, 141.0, 140.6, 139.2, 138.7, 135.4, 135.2, 134.7(1C, aryl C), 130.2(1C, aryl C), 126.3(1C, aryl C), 123.8(1C, aryl C), 122.9(1C, aryl C), 114.9(1C, aryl C), 113.0(1C, aryl C), 112.5(1C, aryl C), 86.1(1C,  $sp^3$ -C of  $C_{60}$ ), 65.0(1C,  $sp^3$ -C of  $C_{60}$ ); HRMS (MALDI-TOF-MS, DCTB as matrix, negative mode):  $m/z$   $[M]^-$  calcd for  $C_{68}H_6BrNO$  930.9633; found 930.9637.

### Synthesis of 3h

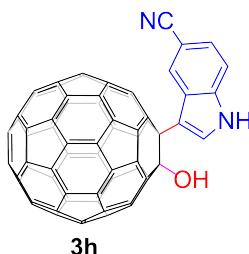

$C_{60}$  (36.0 mg, 0.05 mmol), indole-5-carbonitrile (8.6 mg, 0.06 mmol), KO<sup>t</sup>Bu (11.2 mg, 0.1 mmol) were dissolved in chlorobenzene (8 mL) at room temperature under Ar atmosphere. Then DMSO (2 mL) was added to the mixture and the color of the solution changed gradually from purple to dark green. After being stirred for 30

minutes, CF<sub>3</sub>SO<sub>3</sub>H (180  $\mu$ L, 2 mmol) was added to the mixture and the color changed from dark green to yellowish brown. And after being stirred for 10 minutes, DDQ (56 mg, 0.25 mmol) and H<sub>2</sub>O (36  $\mu$ L, 2 mmol) were added to the mixture and stirred in an oil bath at 110 °C for 60 minutes. The mixture was cooled to room temperature and then added 20 mL carbon disulfide. Resulting dark-yellow solution was washed with water and then evaporated in vacuo. The residue was separated on a silica gel column with carbon disulfide/dichloromethane/ethyl acetate(6:2:1) as the eluent to give unreacted C<sub>60</sub> (13.3 mg, 37%) and **3h** (16 mg, 36%) as black amorphous solid. <sup>1</sup>H NMR (400 MHz, CS<sub>2</sub>/d<sub>6</sub>-DMSO)  $\delta$  11.81 (s, N-H, 1H), 9.00 (s, 1H), 8.00 (d, *J* = 2.0 Hz, 1H), 7.94 (d, *J* = 2.0 Hz, 1H), 7.69 (d, *J* = 8.4 Hz, 1H), 7.51 (d, *J* = 8.4 Hz, 1H); <sup>13</sup>C NMR (100 MHz, CS<sub>2</sub>/d<sub>6</sub>-DMSO)(all 2C unless indicated)  $\delta$  155.7, 147.7(1C), 147.1(1C), 145.8, 145.7, 145.4(4C), 145.2(4C), 144.9, 144.9(4C), 144.6(4C), 144.5, 144.18, 144.15, 142.2, 141.9, 141.84(4C), 141.76, 141.62, 141.56, 141.4, 141.1, 140.6, 139.2, 138.7, 138.2, 135.3(1C, aryl C), 128.3(1C, aryl C), 127.1(1C, aryl C), 126.1(1C, aryl C), 123.7(1C, aryl C), 119.8(-CN), 116.5(1C, aryl C), 112.6(1C, aryl C), 101.9(1C, aryl C), 86.2(1C, *sp*<sup>3</sup>-C of C<sub>60</sub>), 64.8(1C, *sp*<sup>3</sup>-C of C<sub>60</sub>); HRMS (MALDI-TOF-MS, DCTB as matrix, negative mode): *m/z* [M]<sup>-</sup> calcd for C<sub>69</sub>H<sub>6</sub>N<sub>2</sub>O 878.0480; found 878.0485.

### Synthesis of **3i**

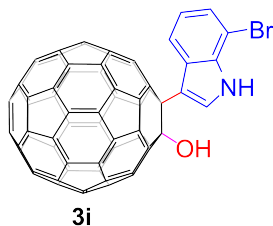

C<sub>60</sub> (36.0 mg, 0.05 mmol), 7-bromoindole (12 mg, 0.06 mmol), KO<sup>t</sup>Bu (11.2 mg, 0.1 mmol) were dissolved in chlorobenzene (8 mL) at room temperature under Ar atmosphere. Then DMSO (2 mL) was added to the mixture and the color of the solution changed gradually from purple to dark green. After being stirred for 30 minutes, CF<sub>3</sub>SO<sub>3</sub>H (180  $\mu$ L, 2 mmol) was added to the mixture and the color changed from dark green to yellowish brown. And after being stirred for 10 minutes, DDQ (56 mg, 0.25 mmol) and H<sub>2</sub>O (36  $\mu$ L, 2 mmol) were added to the mixture and stirred in an oil bath at 110 °C for 60 minutes. The mixture was cooled to room temperature and then added 20 mL carbon disulfide. Resulting dark-yellow solution was washed with water and then evaporated in vacuo. The residue was separated on a silica gel column with carbon disulfide/dichloromethane (2:1) as the eluent to give unreacted C<sub>60</sub> (10 mg, 28%) and **3i** (27 mg, 58%) as black amorphous solid. <sup>1</sup>H NMR (400 MHz, CS<sub>2</sub>/d<sub>6</sub>-DMSO)  $\delta$  11.38 (s, N-H, 1H), 8.73 (d, *J* = 8.0 Hz, 1H), 7.83 (d, *J* = 1.2 Hz, 1H), 7.77 (s, 1H), 7.43 (d, *J* = 7.6 Hz, 1H), 7.20 (t, *J* = 7.8 Hz, 1H); <sup>13</sup>C NMR (100 MHz, CS<sub>2</sub>/d<sub>6</sub>-DMSO) (all 2C unless indicated)  $\delta$  156.0, 153.9, 147.7(1C), 147.1(1C), 145.8, 145.7, 145.4(4C), 145.2(4C), 145.03, 145.00, 144.63, 144.61, 144.5, 144.20, 144.18, 142.3, 141.84, 141.82, 141.7, 141.61, 141.59, 141.3, 141.0, 140.6, 139.2, 138.7, 135.4, 134.8, 134.8(1C, aryl C), 130.2(1C, aryl C), 126.2(1C, aryl C),

123.7(1C, aryl C), 120.3(1C, aryl C), 120.0(1C, aryl C), 116.4(1C, aryl C), 104.5(1C, aryl C), 86.2(1C,  $sp^3$ -C of C<sub>60</sub>), 65.2(1C,  $sp^3$ -C of C<sub>60</sub>); HRMS (MALDI-TOF-MS, DCTB as matrix, negative mode):  $m/z$  [M]<sup>-</sup> calcd for C<sub>68</sub>H<sub>6</sub>BrNO 930.9633; found 930.9637.

### Synthesis of 5ga

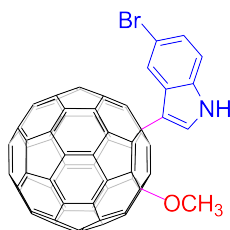

**5ga**

C<sub>60</sub> (36.0 mg, 0.05 mmol), 5-bromoindole (12 mg, 0.06 mmol), KO<sup>t</sup>Bu (11.2 mg, 0.1 mmol) were dissolved in chlorobenzene (8 mL) at room temperature under Ar atmosphere. Then DMSO (2 mL) was added to the mixture and the color of the solution changed gradually from purple to dark green. After being stirred for 30 minutes, CF<sub>3</sub>SO<sub>3</sub>H (90  $\mu$ L, 1 mmol) was added to the mixture and the color changed from dark green to yellowish brown. And after being stirred for 10 minutes, DDQ (56 mg, 0.25 mmol) and CH<sub>3</sub>OH (40  $\mu$ L, 1 mmol) were added to the mixture and stirred in an oil bath at 100 °C for 60 minutes. The mixture was cooled to room temperature and then added 20 mL carbon disulfide. Resulting dark-yellow solution was washed with water and then evaporated in vacuo. The residue was separated on a silica gel column with carbon disulfide/dichloromethane (2:1) as the eluent to give unreacted C<sub>60</sub> (2.1 mg, 6 %) and **5ga** (18.9 mg, 40 %) as black amorphous solid. <sup>1</sup>H NMR (400 MHz, CS<sub>2</sub>/d<sub>6</sub>-DMSO)  $\delta$  11.59 (s, N-H, 1H), 8.59 (d,  $J$  = 7.6 Hz, 1H), 7.85 (d,  $J$  = 2.0 Hz, 1H), 7.46 (d,  $J$  = 8.4 Hz, 1H), 7.30 (d,  $J$  = 8.4 Hz, 1H), 4.19 (s, 3H); <sup>13</sup>C NMR (100 MHz, CS<sub>2</sub>/d<sub>6</sub>-DMSO) (all 1C unless indicated)  $\delta$  154.5, 154.0, 152.0, 149.0, 148.2, 147.6, 147.1, 146.9, 146.4, 146.24(2C), 146.18(2C), 146.1, 145.9, 145.80, 145.77, 145.0(2C), 144.8, 144.20, 144.18, 143.9, 143.8(2C), 143.7, 143.6, 143.50, 143.47(4C), 143.4, 143.2, 143.0, 142.7, 142.63, 142.58, 142.56, 142.55, 142.4(2C), 142.18(2C), 142.16, 142.03, 142.00, 141.82, 141.80, 141.6, 141.5, 140.3, 140.0, 139.6, 139.1, 138.8, 136.74, 136.67, 135.3(aryl C), 126.7(aryl C), 125.5(aryl C), 124.3(aryl C), 121.8(aryl C), 113.8(aryl C), 113.4(aryl C), 112.9(aryl C), 80.5( $sp^3$ -C of C<sub>60</sub>), 55.4( $sp^3$ -C of C<sub>60</sub>), 54.0(-OCH<sub>3</sub>); HRMS (MALDI-TOF-MS, DCTB as matrix, negative mode):  $m/z$  [M]<sup>-</sup> calcd for C<sub>69</sub>H<sub>8</sub>BrNO 944.9789; found 944.9794.

### Synthesis of 5ha



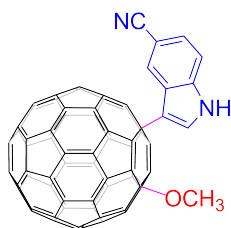

**5ha**

C<sub>60</sub> (36.0 mg, 0.05 mmol), indole-5-carbonitrile (8.6 mg, 0.06 mmol), KO<sup>t</sup>Bu (11.2 mg, 0.1 mmol) were dissolved in chlorobenzene (8 mL) at room temperature under Ar atmosphere. Then DMSO (2 mL) was added to the mixture and the color of the solution changed gradually from purple to dark green. After being stirred for 30 minutes, CF<sub>3</sub>SO<sub>3</sub>H (90 μL, 1 mmol) was added to the mixture and the color changed from dark green to yellowish brown. And after being stirred for 10 minutes, DDQ (56 mg, 0.25 mmol) and CH<sub>3</sub>OH (40 μL, 1 mmol) were added to the mixture and stirred in an oil bath at 110 °C for 60 minutes. The mixture was cooled to room temperature and then added 20 mL carbon disulfide. Resulting dark-yellow solution was washed with water and then evaporated in vacuo. The residue was separated on a silica gel column with carbon disulfide/dichloromethane (1:1) as the eluent to give unreacted C<sub>60</sub> (10 mg, 28%) and **5ha** (26 mg, 58%) as black amorphous solid. <sup>1</sup>H NMR (400 MHz, CS<sub>2</sub>/d<sub>6</sub>-DMSO) δ 11.99 (s, N-H, 1H), 8.94 (s, 1H), 8.00 (d, *J* = 2.0 Hz, 1H), 7.68 (d, *J* = 8.8 Hz, 1H), 7.48 (d, *J* = 8.8 Hz, 1H), 4.23 (s, 3H); <sup>13</sup>C NMR (100 MHz, CS<sub>2</sub>/d<sub>6</sub>-DMSO) (all 1C unless indicated) δ 153.8, 153.4, 151.4, 148.6, 147.9, 147.4, 146.8, 146.5, 146.2, 146.01, 145.96, 145.94, 145.89, 145.8, 145.7, 145.53, 145.50, 144.7(2C), 144.6, 144.0, 143.9, 143.6, 143.5, 143.4(2C), 143.3(2C), 143.23, 143.19(3C), 143.1, 143.0, 142.6, 142.5, 142.4, 142.3(3C), 142.14, 142.08, 142.0(2C), 141.9, 141.8, 141.7, 141.6, 141.5, 141.3, 141.2, 140.1, 139.8, 139.5, 138.8, 138.4, 138.0, 136.6, 136.5(aryl C), 126.5(aryl C), 124.6(aryl C), 124.5(aryl C), 123.8(aryl C), 119.0(-CN), 114.8(aryl C), 112.7(aryl C), 102.3(aryl C), 80.2(*sp*<sup>3</sup>-C of C<sub>60</sub>), 54.8(*sp*<sup>3</sup>-C of C<sub>60</sub>), 53.6(-OCH<sub>3</sub>); HRMS (MALDI-TOF-MS, DCTB as matrix, negative mode): *m/z* [M]<sup>-</sup> calcd for C<sub>70</sub>H<sub>8</sub>N<sub>2</sub>O 892.0637; found 892.0639.

### Synthesis of **5ia**

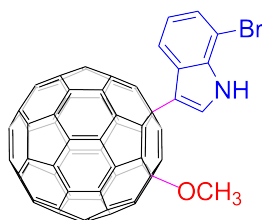

**5ia**

C<sub>60</sub> (36.0 mg, 0.05 mmol), 7-bromoindole (12 mg, 0.06 mmol), KO<sup>t</sup>Bu (11.2 mg, 0.1 mmol) were dissolved in chlorobenzene (8 mL) at room temperature under Ar atmosphere. Then DMSO (2 mL) was added to the mixture and the color of the solution changed gradually from purple to dark green. After being stirred for 30 minutes, CF<sub>3</sub>SO<sub>3</sub>H (90 μL, 1 mmol) was added to the mixture and the color changed



from dark green to yellowish brown. And after being stirred for 10 minutes, DDQ (56 mg, 0.25 mmol) and CH<sub>3</sub>OH (40  $\mu$ L, 1 mmol) were added to the mixture and stirred in an oil bath at 100 °C for 60 minutes. The mixture was cooled to room temperature and then added 20 mL carbon disulfide. Resulting dark-yellow solution was washed with water and then evaporated in vacuo. The residue was separated on a silica gel column with carbon disulfide as the eluent to give unreacted C<sub>60</sub> (8.4 mg, 23%) and **5ia** (17.7 mg, 37%) as black amorphous solid. <sup>1</sup>H NMR (400 MHz, CS<sub>2</sub>/d<sub>6</sub>-DMSO)  $\delta$  11.55 (s, N-H, 1H), 8.38 (d, *J* = 8.0 Hz, 1H), 7.90 (d, *J* = 1.6 Hz, 1H), 7.39 (d, *J* = 7.6 Hz, 1H), 7.08 (t, *J* = 7.6 Hz, 1H), 4.12 (s, 3H); <sup>13</sup>C NMR (100 MHz, CS<sub>2</sub>/d<sub>6</sub>-DMSO) (all 1C unless indicated)  $\delta$  154.5, 153.8, 152.0, 149.2, 148.1, 147.6, 147.1, 146.9, 146.4, 146.3, 146.23, 146.17, 146.14, 146.10, 145.9, 145.81, 145.75, 144.9(2C), 144.8, 144.2(2C), 143.9, 143.80, 143.78, 143.7, 143.51, 143.50, 143.45(3C), 143.41, 143.38, 143.3, 143.1, 142.7, 142.63, 142.57, 142.55, 142.5, 142.40, 142.38, 142.21, 142.17(2C), 142.0(2C), 141.79, 141.75, 141.6, 141.5, 140.3, 140.0, 139.7, 139.0, 138.7, 136.82, 136.75, 135.0(aryl C), 126.8(aryl C), 125.4(aryl C), 124.1(aryl C), 120.3(aryl C), 119.0(aryl C), 115.2(aryl C), 105.2(aryl C), 80.5(*sp*<sup>3</sup>-C of C<sub>60</sub>), 55.5(*sp*<sup>3</sup>-C of C<sub>60</sub>), 54.2(-OCH<sub>3</sub>); HRMS (MALDI-TOF-MS, DCTB as matrix, negative mode): *m/z* [M]<sup>-</sup> calcd for C<sub>69</sub>H<sub>8</sub>BrNO 944.9789; found 944.9792.

### Synthesis of **5ja**

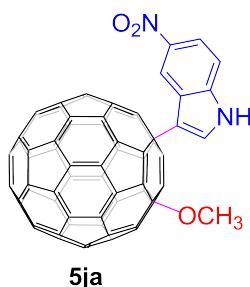

C<sub>60</sub> (36.0 mg, 0.05 mmol), 5-nitroindole (9.8 mg, 0.06 mmol), KO<sup>t</sup>Bu (11.2 mg, 0.1 mmol) were dissolved in chlorobenzene (8 mL) at room temperature under Ar atmosphere. Then DMSO (2 mL) was added to the mixture and the color of the solution changed gradually from purple to dark green. After being stirred for 30 minutes, CF<sub>3</sub>SO<sub>3</sub>H (90  $\mu$ L, 1 mmol) was added to the mixture and the color changed from dark green to yellowish brown. And after being stirred for 10 minutes, DDQ (56 mg, 0.25 mmol) and CH<sub>3</sub>OH (40  $\mu$ L, 1 mmol) were added to the mixture and stirred in an oil bath at 110 °C for 60 minutes. The mixture was cooled to room temperature and then added 20 mL carbon disulfide. Resulting dark-yellow solution was washed with water and then evaporated in vacuo. The residue was separated on a silica gel column with carbon disulfide/dichloromethane (1:1) as the eluent to give unreacted C<sub>60</sub> (10.5 mg, 29%) and **5ja** (15.5 mg, 34%) as black amorphous solid. <sup>1</sup>H NMR (400 MHz, CS<sub>2</sub>/d<sub>6</sub>-DMSO)  $\delta$  12.13 (s, N-H, 1H), 9.54 (s, 1H), 8.13 (dd, *J* = 8.8, 1.6 Hz, 1H), 8.05 (d, *J* = 2.0 Hz, 1H), 7.67 (d, *J* = 8.8 Hz, 1H), 4.24 (s, 3H); <sup>13</sup>C NMR (100 MHz, CS<sub>2</sub>/d<sub>6</sub>-DMSO) (all 1C unless indicated)  $\delta$  154.0, 153.4, 151.5, 148.9, 148.2,

147.7, 147.1, 146.8, 146.4, 146.3, 146.23, 146.20(2C), 146.1, 145.9, 145.81, 145.77, 145.0(2C), 144.8, 144.3, 144.2, 143.81, 143.78, 143.69, 143.67, 143.6, 143.53, 143.50, 143.5(2C), 143.4, 143.2, 142.9, 142.74, 142.65, 142.61, 142.58, 142.56, 142.42, 142.35, 142.3, 142.24, 142.18, 142.03, 141.95, 141.82, 141.81, 141.6, 141.5, 141.1(2C), 140.3, 140.04, 139.98, 139.7(2C), 139.1, 138.6(aryl C), 136.9(aryl C), 136.7(aryl C), 127.8(aryl C), 124.2(aryl C), 116.9(aryl C), 116.7(aryl C), 111.9(aryl C), 80.5( $sp^3$ -C of C<sub>60</sub>), 55.0( $sp^3$ -C of C<sub>60</sub>), 54.1(-OCH<sub>3</sub>); HRMS (MALDI-TOF-MS, DCTB as matrix, negative mode): m/z [M]<sup>-</sup> calcd for C<sub>69</sub>H<sub>8</sub>N<sub>2</sub>O<sub>3</sub> 912.0535; found 912.0538.

### Synthesis of 5ka

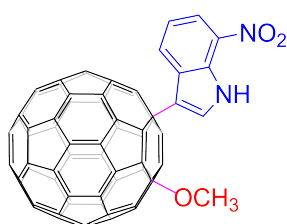

**5ka**

C<sub>60</sub> (36.0 mg, 0.05 mmol), 5-nitroindole (9.8 mg, 0.06 mmol), KO<sup>t</sup>Bu (11.2 mg, 0.1 mmol) were dissolved in chlorobenzene (8 mL) at room temperature under Ar atmosphere. Then DMSO (2 mL) was added to the mixture and the color of the solution changed gradually from purple to dark green. After being stirred for 30 minutes, CF<sub>3</sub>SO<sub>3</sub>H (90 μL, 1 mmol) was added to the mixture and the color changed from dark green to yellowish brown. And after being stirred for 10 minutes, DDQ (56 mg, 0.25 mmol) and CH<sub>3</sub>OH (40 μL, 1 mmol) were added to the mixture and stirred in an oil bath at 110 °C for 60 minutes. The mixture was cooled to room temperature and then added 20 mL carbon disulfide. Resulting dark-yellow solution was washed with water and then evaporated in vacuo. The residue was separated on a silica gel column with carbon disulfide/dichloromethane (1:1) as the eluent to give unreacted C<sub>60</sub> (11 mg, 31%) and **5ka** (16.4 mg, 36%) as black amorphous solid. <sup>1</sup>H NMR (400 MHz, CS<sub>2</sub>/d<sub>6</sub>-DMSO) δ 12.32 (s, N-H, 1H), 8.94 (d, *J* = 8.0 Hz, 1H), 8.23 (d, *J* = 8.0 Hz, 1H), 8.05 (d, *J* = 2.0 Hz, 1H), 7.36 (t, *J* = 8.0 Hz, 1H), 4.15 (s, 3H); <sup>13</sup>C NMR (100 MHz, CS<sub>2</sub>/d<sub>6</sub>-DMSO) (all 1C unless indicated) δ 154.0, 153.4, 151.5, 148.9, 148.2, 147.7, 147.1, 146.8, 146.4, 146.3, 146.20(2C), 146.16, 146.1, 145.9, 145.79, 145.76, 144.98, 144.96, 144.8, 144.3, 144.2, 143.81, 143.75, 143.71, 143.66, 143.49, 143.47(3C), 143.41(2C), 143.3, 143.2, 143.0, 142.72, 142.66, 142.6(2C), 142.5, 142.44, 142.38, 142.3, 142.2(2C), 141.96, 141.93, 141.81, 141.77, 141.6, 141.5, 140.3, 140.0(2C), 139.0, 138.6, 136.9, 136.8, 132.8(aryl C), 129.4(aryl C), 129.2(aryl C), 127.9(aryl C), 127.5(aryl C), 118.7(aryl C), 118.5(aryl C), 115.7(aryl C), 80.5( $sp^3$ -C of C<sub>60</sub>), 54.8( $sp^3$ -C of C<sub>60</sub>), 54.1(-OCH<sub>3</sub>); HRMS (MALDI-TOF-MS, DCTB as matrix, negative mode): m/z [M]<sup>-</sup> calcd for C<sub>69</sub>H<sub>8</sub>N<sub>2</sub>O<sub>3</sub> 912.0535; found 912.0540.

### Synthesis of 5la

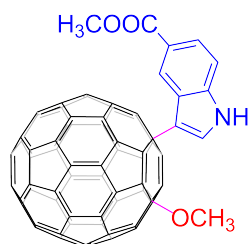

**5la**

C<sub>60</sub> (36.0 mg, 0.05 mmol), methyl indole-5-carboxylate (10.2 mg, 0.06 mmol), KO<sup>t</sup>Bu (11.2 mg, 0.1 mmol) were dissolved in chlorobenzene (8 mL) at room temperature under Ar atmosphere. Then DMSO (2 mL) was added to the mixture and the color of the solution changed gradually from purple to dark green. After being stirred for 30 minutes, CF<sub>3</sub>SO<sub>3</sub>H (90 μL, 1 mmol) was added to the mixture and the color changed from dark green to yellowish brown. And after being stirred for 10 minutes, DDQ (34 mg, 0.15 mmol) and CH<sub>3</sub>OH (40 μL, 1 mmol) were added to the mixture and stirred in an oil bath at 120 °C for 30 minutes. The mixture was cooled to room temperature and then added 20 mL carbon disulfide. Resulting dark-yellow solution was washed with water and then evaporated in vacuo. The residue was separated on a silica gel column with carbon disulfide/dichloromethane (1:1) as the eluent to give unreacted C<sub>60</sub> (4 mg, 11%) and **5la** (16.6 mg, 36%) as black amorphous solid. <sup>1</sup>H NMR (400 MHz, CS<sub>2</sub>/d<sub>6</sub>-DMSO) δ 11.75 (s, N-H, 1H), 9.14 (s, 1H), 7.93 (d, *J* = 2.4 Hz, 1H), 7.89 (d, *J* = 8.4 Hz, 1H), 7.56 (d, *J* = 8.8 Hz, 1H), 4.18 (s, 3H), 3.89 (s, 3H); <sup>13</sup>C NMR (150 MHz, CS<sub>2</sub>/d<sub>6</sub>-DMSO) (all 1C unless indicated) δ 166.0(acyl C), 154.6, 154.0, 152.0, 149.1, 148.2, 147.6(2C), 147.1, 146.9, 146.4, 146.3, 146.24, 146.16(5C), 145.9, 145.84, 145.77, 144.9(3C), 144.8, 144.2, 144.0, 143.8(2C), 143.7, 143.6, 143.5(4C), 143.4, 143.2, 143.1, 142.7, 142.6, 142.58, 142.55, 142.4, 142.37, 142.2, 142.18, 142.17, 142.0, 141.8, 141.6, 141.5, 141.1, 140.3, 140.0 139.7, 139.2, 139.1, 138.8, 136.8, 136.7(aryl C), 125.7(aryl C), 124.6(aryl C), 122.8(aryl C), 122.5(aryl C), 121.2(aryl C), 115.6(aryl C), 111.4(aryl C), 80.5(sp<sup>3</sup>-C of C<sub>60</sub>), 55.4(sp<sup>3</sup>-C of C<sub>60</sub>), 54.1(-OCH<sub>3</sub>), 50.7(-CH<sub>3</sub>); HRMS (MALDI-TOF-MS, DCTB as matrix, negative mode): *m/z* [M]<sup>-</sup> calcd for C<sub>71</sub>H<sub>11</sub>NO<sub>3</sub> 925.0739; found 925.0743.

### Synthesis of 5fa

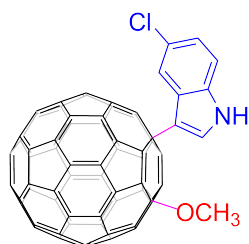

**5fa**

C<sub>60</sub> (36.0 mg, 0.05 mmol), 5-chloroindole (9 mg, 0.06 mmol), KO<sup>t</sup>Bu (11.2 mg, 0.1 mmol) were dissolved in chlorobenzene (8 mL) at room temperature under Ar atmosphere. Then DMSO (2 mL) was added to the mixture and the color of the solution changed gradually from purple to dark green. After being stirred for 30 minutes, CF<sub>3</sub>SO<sub>3</sub>H (90 μL, 1 mmol) was added to the mixture and the color changed from dark green to yellowish brown. And after being stirred for 10 minutes, DDQ (56 mg, 0.25 mmol) and CH<sub>3</sub>OH (40 μL, 1 mmol) were added to the mixture and stirred

in an oil bath at 100 °C for 60 minutes. The mixture was cooled to room temperature and then added 20 mL carbon disulfide. Resulting dark-yellow solution was washed with water and then evaporated in vacuo. The residue was separated on a silica gel column with carbon disulfide/dichloromethane (2:1) as the eluent to give unreacted C<sub>60</sub> (3 mg, 8%) and **5fa** (18.7 mg, 42%) as black amorphous solid. <sup>1</sup>H NMR (400 MHz, CS<sub>2</sub>/d<sub>6</sub>-DMSO) δ 11.58 (s, N-H, 1H), 8.41 (d, *J* = 1.6 Hz, 1H), 7.87 (d, *J* = 2.4 Hz, 1H), 7.50 (d, *J* = 8.8 Hz, 1H), 7.17 (dd, *J* = 8.8, 2.0 Hz, 1H), 4.18 (s, 3H); <sup>13</sup>C NMR (100 MHz, CS<sub>2</sub>/d<sub>6</sub>-DMSO) (all 1C unless indicated) δ 154.5, 154.0, 152.0, 149.0, 148.2, 147.6, 147.1, 146.9, 146.4, 146.27, 146.25, 146.2(2C), 146.1, 145.9, 145.82, 145.77, 145.00(2C), 144.8, 144.2, 144.2, 144.0, 143.82, 143.80, 143.7, 143.6, 143.49(3C), 143.48(2C), 143.4, 143.2, 143.1, 142.7, 142.64, 142.58(3C), 142.4(2C), 142.2(3C), 142.04, 142.01, 141.82, 141.81, 141.6, 141.5, 140.3, 140.0, 139.6, 139.1, 138.8, 136.8, 136.7, 135.1(aryl C), 126.1(aryl C), 125.7(aryl C), 124.9(aryl C), 121.7(aryl C), 118.8(aryl C), 113.8(aryl C), 113.0(aryl C), 80.5(*sp*<sup>3</sup>-C of C<sub>60</sub>), 55.4(*sp*<sup>3</sup>-C of C<sub>60</sub>), 54.0(-OCH<sub>3</sub>); HRMS (MALDI-TOF-MS, DCTB as matrix, negative mode): *m/z* [M]<sup>-</sup> calcd for C<sub>69</sub>H<sub>8</sub>ClNO 901.0294; found 901.0298.

### Synthesis of **5aa**

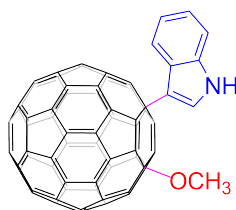

**5aa**

C<sub>60</sub> (36.0 mg, 0.05 mmol), indole (7.2 mg, 0.06 mmol), KO<sup>t</sup>Bu (11.2 mg, 0.1 mmol) were dissolved in chlorobenzene (8 mL) at room temperature under Ar atmosphere. Then DMSO (2 mL) was added to the mixture and the color of the solution changed gradually from purple to dark green. After being stirred for 30 minutes, CF<sub>3</sub>SO<sub>3</sub>H (90 μL, 1 mmol) was added to the mixture and the color changed from dark green to yellowish brown. And after being stirred for 10 minutes, DDQ (56 mg, 0.25 mmol) and CH<sub>3</sub>OH (40 μL, 1 mmol) were added to the mixture and stirred in an oil bath at 110 °C for 60 minutes. The mixture was cooled to room temperature and then added 20 mL carbon disulfide. Resulting dark-yellow solution was washed with water and then evaporated in vacuo. The residue was separated on a silica gel column with carbon disulfide/dichloromethane (2:1) as the eluent to give unreacted C<sub>60</sub> (5.5 mg, 15%) and **5aa** (14 mg, 32%) as black amorphous solid. <sup>1</sup>H NMR (400 MHz, CS<sub>2</sub>/d<sub>6</sub>-DMSO) δ 11.36 (s, N-H, 1H), 8.34 (d, *J* = 7.6 Hz, 1H), 7.82 (d, *J* = 2.4 Hz, 1H), 7.50 (d, *J* = 8.0 Hz, 1H), 7.20 (d, *J* = 7.6 Hz, 1H), 7.12 (t, *J* = 7.6 Hz, 1H), 4.12 (s, 3H); <sup>13</sup>C NMR (100 MHz, CS<sub>2</sub>/d<sub>6</sub>-DMSO) (all 1C unless indicated) δ 155.0, 154.3, 152.5, 149.3, 148.1, 147.6, 147.2, 147.0, 146.4, 146.4, 146.22, 146.16, 146.1(2C), 145.9(2C), 145.7, 144.93, 144.92, 144.8, 144.22, 144.15, 144.0, 143.9, 143.8, 143.7, 143.6, 143.53, 143.49, 143.48, 143.43, 143.40(2C), 143.3, 143.2, 142.7, 142.63, 142.56, 142.55, 142.5, 142.4, 142.3, 142.2(2C), 142.1, 142.03, 142.00, 141.79, 141.77,

141.6, 141.5, 140.3, 139.9, 139.5, 139.0, 138.9, 136.73, 136.66, 136.6(aryl C), 125.2(aryl C), 123.9(aryl C), 121.5(aryl C), 119.6(aryl C), 119.2(aryl C), 114.1(aryl C), 111.8(aryl C), 80.6( $sp^3$ -C of C<sub>60</sub>), 55.8( $sp^3$ -C of C<sub>60</sub>), 54.2(-OCH<sub>3</sub>); HRMS (MALDI-TOF-MS, DCTB as matrix, negative mode):  $m/z$  [M]<sup>-</sup> calcd for C<sub>69</sub>H<sub>9</sub>NO 867.0684; found 867.0686.

### Synthesis of 5gb

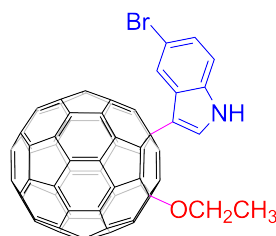

**5gb**

C<sub>60</sub> (36.0 mg, 0.05 mmol), 5-bromoindole (12 mg, 0.06 mmol), KO<sup>t</sup>Bu (11.2 mg, 0.1 mmol) were dissolved in chlorobenzene (8 mL) at room temperature under Ar atmosphere. Then DMSO (2 mL) was added to the mixture and the color of the solution changed gradually from purple to dark green. After being stirred for 30 minutes, CF<sub>3</sub>SO<sub>3</sub>H (90  $\mu$ L, 1 mmol) was added to the mixture and the color changed from dark green to yellowish brown. And after being stirred for 10 minutes, DDQ (56 mg, 0.25 mmol) and CH<sub>3</sub>CH<sub>2</sub>OH (58  $\mu$ L, 1 mmol) were added to the mixture and stirred in an oil bath at 100 °C for 60 minutes. The mixture was cooled to room temperature and then added 20 mL carbon disulfide. Resulting dark-yellow solution was washed with water and then evaporated in vacuo. The residue was separated on a silica gel column with carbon disulfide/dichloromethane (2:1) as the eluent to give unreacted C<sub>60</sub> (1.1 mg, 3%) and **5gb** (27.4 mg, 57%) as black amorphous solid. <sup>1</sup>H NMR (400 MHz, CS<sub>2</sub>/d<sub>6</sub>-DMSO)  $\delta$  11.59 (s, N-H, 1H), 8.53 (s, 1H), 7.86 (d, J = 2.0 Hz, 1H), 7.45 (d, J = 8.4 Hz, 1H), 7.29 (d, J = 8.4 Hz, 1H), 4.52 (q, J = 6.8 Hz, 2H), 1.60 (t, J = 6.8 Hz, 3H); <sup>13</sup>C NMR (100 MHz, CS<sub>2</sub>/d<sub>6</sub>-DMSO) (all 1C unless indicated)  $\delta$  154.5, 153.7, 151.6, 149.6, 148.1, 147.6, 147.1, 146.9, 146.5, 146.4, 146.3, 146.2, 146.17(2C), 145.9, 145.8, 145.75, 144.9(2C), 144.8, 144.2, 144.17, 144.0, 143.8, 143.76, 143.7, 143.6, 143.5(5C), 143.4, 143.2, 143.0, 142.7, 142.6, 142.59(2C), 142.5, 142.4(2C), 142.2, 142.15(2C), 142.04, 142.0, 141.8(2C), 141.6, 141.5, 140.3, 140.1, 139.92, 138.9, 138.7, 136.8, 136.7, 135.3(aryl C), 126.8(aryl C), 125.6(aryl C), 124.3(aryl C), 121.9(aryl C), 113.6(aryl C), 113.4(aryl C), 112.9(aryl C), 79.9( $sp^3$ -C of C<sub>60</sub>), 62.5(-OCH<sub>2</sub>-), 55.3( $sp^3$ -C of C<sub>60</sub>), 15.7(-CH<sub>3</sub>); HRMS (MALDI-TOF-MS, DCTB as matrix, negative mode):  $m/z$  [M]<sup>-</sup> calcd for C<sub>70</sub>H<sub>10</sub>BrNO 958.9946; found 958.9949.

### Synthesis of 5hb

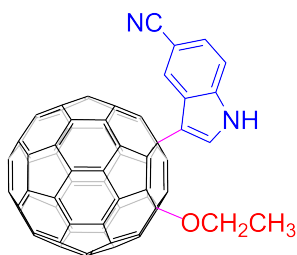

**5hb**

C<sub>60</sub> (36.0 mg, 0.05 mmol), indole-5-carbonitrile (8.6 mg, 0.06 mmol), KO<sup>t</sup>Bu (11.2 mg, 0.1 mmol) were dissolved in chlorobenzene (8 mL) at room temperature under Ar atmosphere. Then DMSO (2 mL) was added to the mixture and the color of the solution changed gradually from purple to dark green. After being stirred for 30 minutes, CF<sub>3</sub>SO<sub>3</sub>H (90 μL, 1 mmol) was added to the mixture and the color changed from dark green to yellowish brown. And after being stirred for 10 minutes, DDQ (56 mg, 0.25 mmol) and CH<sub>3</sub>CH<sub>2</sub>OH (58 μL, 1 mmol) were added to the mixture and stirred in an oil bath at 100 °C for 60 minutes. The mixture was cooled to room temperature and then added 20 mL carbon disulfide. Resulting dark-yellow solution was washed with water and then evaporated in vacuo. The residue was separated on a silica gel column with carbon disulfide/dichloromethane (2:1) as the eluent to give unreacted C<sub>60</sub> (5.2 mg, 14%) and **5hb** (18.1 mg, 40%) as black amorphous solid. <sup>1</sup>H NMR (400 MHz, CS<sub>2</sub>/d<sub>6</sub>-DMSO) δ 12.00 (s, N-H, 1H), 8.96 (s, 1H), 8.01 (s, 1H), 7.68 (d, *J* = 8.4 Hz, 1H), 7.49 (d, *J* = 8.4 Hz, 1H), 4.58 (q, *J* = 6.8 Hz, 2H), 1.65 (t, *J* = 6.8 Hz, 3H); <sup>13</sup>C NMR (100 MHz, CS<sub>2</sub>/d<sub>6</sub>-DMSO) (all 1C unless indicated) δ 154.1, 153.4, 151.2, 149.4, 148.2, 147.7, 147.0, 146.8, 146.5, 146.4, 146.3, 146.24, 146.21, 146.2, 145.9, 145.8, 145.75, 145.0, 144.9, 144.8, 144.3, 144.2, 143.9, 143.8, 143.7, 143.7, 143.6, 143.5(2C), 143.47, 143.4(2C), 143.37, 143.2, 142.9, 142.7, 142.67, 142.62, 142.6, 142.5, 142.4, 142.3, 142.25, 142.2, 142.17, 142.1, 142.0, 141.8(2C), 141.6, 141.5, 140.3, 140.2, 140.0, 139.0, 138.7, 138.2(2C), 136.8(aryl C), 136.7(aryl C), 126.8(aryl C), 124.8(aryl C), 124.1(aryl C), 119.2(-CN), 115.0(aryl C), 112.9(aryl C), 102.6(aryl C), 79.9(*sp*<sup>3</sup>-C of C<sub>60</sub>), 62.5(-OCH<sub>2</sub>-), 55.0(*sp*<sup>3</sup>-C of C<sub>60</sub>), 15.6(-CH<sub>3</sub>); HRMS (MALDI-TOF-MS, DCTB as matrix, negative mode): *m/z* [M]<sup>-</sup> calcd for C<sub>71</sub>H<sub>10</sub>N<sub>2</sub>O 906.0793; found 906.0797.

### Synthesis of 5ab

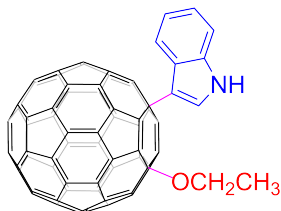

**5ab**

C<sub>60</sub> (36.0 mg, 0.05 mmol), indole (7.2 mg, 0.06 mmol), KO<sup>t</sup>Bu (11.2 mg, 0.1 mmol) were dissolved in chlorobenzene (8 mL) at room temperature under Ar atmosphere. Then DMSO (2 mL) was added to the mixture and the color of the solution changed gradually from purple to dark green. After being stirred for 30 minutes, CF<sub>3</sub>SO<sub>3</sub>H (90



$\mu\text{L}$ , 1 mmol) was added to the mixture and the color changed from dark green to yellowish brown. And after being stirred for 10 minutes, DDQ (56 mg, 0.25 mmol) and  $\text{CH}_3\text{CH}_2\text{OH}$  (58  $\mu\text{L}$ , 1 mmol) were added to the mixture and stirred in an oil bath at 110  $^\circ\text{C}$  for 60 minutes. The mixture was cooled to room temperature and then added 20 mL carbon disulfide. Resulting dark-yellow solution was washed with water and then evaporated in vacuo. The residue was separated on a silica gel column with carbon disulfide/dichloromethane (2:1) as the eluent to give unreacted  $\text{C}_{60}$  (4.5 mg, 13%) and **5ab** (13.8 mg, 31%) as black amorphous solid.  $^1\text{H}$  NMR (400 MHz,  $\text{CS}_2/d_6\text{-DMSO}$ )  $\delta$  11.31 (s, N-H, 1H), 8.43 (d,  $J = 8.0$  Hz, 1H), 7.79 (d,  $J = 2.4$  Hz, 1H), 7.49 (d,  $J = 8.0$  Hz, 1H), 7.21 (t,  $J = 7.6$  Hz, 1H), 7.13 (t,  $J = 7.6$  Hz, 1H), 4.49 (qd,  $J = 7.2, 3.6$  Hz, 2H), 1.58 (t,  $J = 7.2$  Hz, 3H).  $^{13}\text{C}$  NMR (100 MHz,  $\text{CS}_2/d_6\text{-DMSO}$ ) (all 1C unless indicated)  $\delta$  155.0, 154.2, 152.1, 149.7, 148.1, 147.6, 147.1, 147.0, 146.54, 146.46, 146.4, 146.21, 146.17, 146.1, 145.9, 145.8, 145.7, 144.9(2C), 144.8, 144.21, 144.16, 144.1, 143.9, 143.8, 143.64, 143.58, 143.48(2C), 143.46(2C), 143.41, 143.37, 143.3, 143.2, 142.7, 142.62, 142.61, 142.6, 142.5, 142.4, 142.3, 142.14(3C), 142.05(2C), 141.8, 141.75, 141.6, 141.5, 140.3, 139.9, 139.86, 138.8(2C), 136.7, 136.67, 136.6(aryl C), 125.2(aryl C), 124.0(aryl C), 121.5(aryl C), 119.7(aryl C), 119.1(aryl C), 114.0(aryl C), 111.7(aryl C), 80.0( $sp^3\text{-C}$  of  $\text{C}_{60}$ ), 62.5( $-\text{OCH}_2-$ ), 55.8( $sp^3\text{-C}$  of  $\text{C}_{60}$ ), 15.6( $-\text{CH}_3$ ); HRMS (MALDI-TOF-MS, DCTB as matrix, negative mode):  $m/z$   $[\text{M}]^-$  calcd for  $\text{C}_{70}\text{H}_{11}\text{NO}$  881.0841; found 881.0845.

### Synthesis of **5hc**

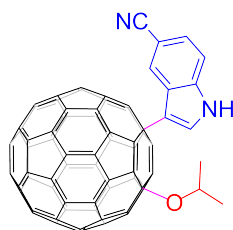

**5hc**

$\text{C}_{60}$  (36.0 mg, 0.05 mmol), indole-5-carbonitrile (8.6 mg, 0.06 mmol), KO<sup>t</sup>Bu (11.2 mg, 0.1 mmol) were dissolved in chlorobenzene (8 mL) at room temperature under Ar atmosphere. Then DMSO (2 mL) was added to the mixture and the color of the solution changed gradually from purple to dark green. After being stirred for 30 minutes,  $\text{CF}_3\text{SO}_3\text{H}$  (90  $\mu\text{L}$ , 1 mmol) was added to the mixture and the color changed from dark green to yellowish brown. And after being stirred for 10 minutes, DDQ (56 mg, 0.25 mmol) and  $\text{CH}_3\text{CHOHCH}_3$  (76  $\mu\text{L}$ , 1 mmol) were added to the mixture and stirred in an oil bath at 100  $^\circ\text{C}$  for 60 minutes. The mixture was cooled to room temperature and then added 20 mL carbon disulfide. Resulting dark-yellow solution was washed with water and then evaporated in vacuo. The residue was separated on a silica gel column with carbon disulfide/dichloromethane (2:1) as the eluent to give unreacted  $\text{C}_{60}$  (6.7 mg, 19%) and **5hc** (13.9 mg, 30%) as black amorphous solid.  $^1\text{H}$  NMR (400 MHz,  $\text{CS}_2/d_6\text{-DMSO}$ )  $\delta$  11.97 (s, N-H, 1H), 9.04 (s, 1H), 8.00 (s, 1H), 7.67 (d,  $J = 8.0$  Hz, 1H), 7.48 (d,  $J = 8.4$  Hz, 1H), 5.14-5.08 (m, 1H), 1.63 (d,  $J = 6.0$  Hz, 6H);  $^{13}\text{C}$  NMR (100 MHz,  $\text{CS}_2/d_6\text{-DMSO}$ ) (all 1C unless indicated)  $\delta$  154.1,

153.2, 150.8, 149.8, 148.1, 147.7, 147.2, 146.9, 146.8, 146.5, 146.3, 146.2, 145.9, 145.8, 145.6, 145.0, 144.9, 144.8, 144.3, 144.2, 143.9, 143.8, 143.7, 143.6, 143.59, 143.5, 143.45, 143.4(5C), 143.2, 143.0, 142.7(2C), 142.67(2C), 142.5, 142.4, 142.35, 142.3, 142.24, 142.2, 142.1, 142.0, 141.8(2C), 141.6, 141.5, 140.7, 140.3, 140.0, 138.8, 138.6, 138.2(2C), 136.9, 136.9(aryl C), 126.9(aryl C), 125.1(aryl C), 124.7(aryl C), 124.1(aryl C), 119.3(-CN), 114.9(aryl C), 112.8(aryl C), 102.5(aryl C), 79.2( $sp^3$ -C of  $C_{60}$ ), 69.6(-OCH-), 55.0( $sp^3$ -C of  $C_{60}$ ), 24.1(2C, -CH<sub>3</sub>); HRMS (MALDI-TOF-MS, DCTB as matrix, negative mode):  $m/z$  [M]<sup>-</sup> calcd for  $C_{72}H_{12}N_2O$  920.0950; found 920.0955.

### Synthesis of 5gc

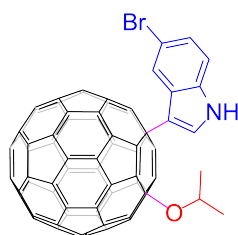

**5gc**

$C_{60}$  (36.0 mg, 0.05 mmol), 5-bromoindole (12 mg, 0.06 mmol), KO<sup>t</sup>Bu (11.2 mg, 0.1 mmol) were dissolved in chlorobenzene (8 mL) at room temperature under Ar atmosphere. Then DMSO (2 mL) was added to the mixture and the color of the solution changed gradually from purple to dark green. After being stirred for 30 minutes, CF<sub>3</sub>SO<sub>3</sub>H (90  $\mu$ L, 1 mmol) was added to the mixture and the color changed from dark green to yellowish brown. And after being stirred for 10 minutes, DDQ (56 mg, 0.25 mmol) and CH<sub>3</sub>CHOHCH<sub>3</sub> (76  $\mu$ L, 1 mmol) were added to the mixture and stirred in an oil bath at 100 °C for 60 minutes. The mixture was cooled to room temperature and then added 20 mL carbon disulfide. Resulting dark-yellow solution was washed with water and then evaporated in vacuo. The residue was separated on a silica gel column with carbon disulfide/dichloromethane (2:1) as the eluent to give unreacted  $C_{60}$  (3.5 mg, 10%) and **5gc** (18.6 mg, 38%) as black amorphous solid. <sup>1</sup>H NMR (400 MHz, CS<sub>2</sub>/d<sub>6</sub>-DMSO)  $\delta$  11.58 (s, 1H), 8.57 (s, 1H), 7.87 (s, 1H), 7.45 (d,  $J$  = 8.4 Hz, 1H), 7.29 (d,  $J$  = 8.4 Hz, 1H), 5.08-5.03 (m, 1H), 1.59 (d,  $J$  = 5.6 Hz, 6H). <sup>13</sup>C NMR (100 MHz, CS<sub>2</sub>/d<sub>6</sub>-DMSO) (all 1C unless indicated)  $\delta$  154.3, 153.5, 151.1, 150.0, 148.1, 147.6, 147.1, 146.9, 146.8, 146.4, 146.37, 146.2, 146.1(2C), 145.8, 145.7, 145.6, 144.9, 144.8, 144.76, 144.2, 144.1, 143.9, 143.8, 143.7, 143.6, 143.5, 143.4(4C), 143.38, 143.3, 143.14, 143.1, 142.6(4C), 142.5, 142.34, 142.32, 142.14(3C), 142.06, 142.0, 141.8(2C), 141.5, 141.4, 140.5, 140.3, 139.9, 138.7, 138.6, 136.8(2C), 135.3(aryl C), 126.6(aryl C), 125.5(aryl C), 124.3(aryl C), 122.0(aryl C), 113.6(aryl C), 113.2(aryl C), 112.9(aryl C), 79.2( $sp^3$ -C of  $C_{60}$ ), 69.3(-OCH-), 55.3( $sp^3$ -C of  $C_{60}$ ), 24.1(2C, -CH<sub>3</sub>).; HRMS (MALDI-TOF-MS, DCTB as matrix, negative mode):  $m/z$  [M]<sup>-</sup> calcd for  $C_{71}H_{12}BrNO$  973.0102; found 973.0105.

### Synthesis of 5gd



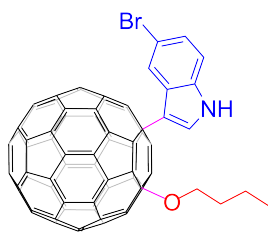

**5gd**

C<sub>60</sub> (36.0 mg, 0.05 mmol), 5-bromoindole (12 mg, 0.06 mmol), KO<sup>t</sup>Bu (11.2 mg, 0.1 mmol) were dissolved in chlorobenzene (8 mL) at room temperature under Ar atmosphere. Then DMSO (2 mL) was added to the mixture and the color of the solution changed gradually from purple to dark green. After being stirred for 30 minutes, CF<sub>3</sub>SO<sub>3</sub>H (90 μL, 1 mmol) was added to the mixture and the color changed from dark green to yellowish brown. And after being stirred for 10 minutes, DDQ (56 mg, 0.25 mmol) and CH<sub>3</sub>CH<sub>2</sub>CH<sub>2</sub>CH<sub>2</sub>OH (92 μL, 1 mmol) were added to the mixture and stirred in an oil bath at 100 °C for 60 minutes. The mixture was cooled to room temperature and then added 20 mL carbon disulfide. Resulting dark-yellow solution was washed with water and then evaporated in vacuo. The residue was separated on a silica gel column with carbon disulfide/dichloromethane (2:1) as the eluent to give unreacted C<sub>60</sub> (2.9 mg, 8%) and **5gd** (24.3 mg, 49%) as black amorphous solid. <sup>1</sup>H NMR (400 MHz, CS<sub>2</sub>/d<sub>6</sub>-DMSO) δ 11.60 (s, N-H, 1H), 8.48 (s, 1H), 7.85 (s, 1H), 7.45 (d, *J* = 8.8 Hz, 1H), 7.28 (d, *J* = 8.8 Hz, 1H), 4.44 (t, *J* = 6.4 Hz, 2H), 1.97-1.90 (m, 2H), 1.62-1.55 (m, 2H), 1.03 (t, *J* = 7.2 Hz, 3H); <sup>13</sup>C NMR (100 MHz, CS<sub>2</sub>/d<sub>6</sub>-DMSO) (all 1C unless indicated) δ 154.4, 153.8, 151.6, 149.6, 148.1, 147.6, 147.1, 146.9, 146.6, 146.4, 146.3, 146.2, 146.2, 146.17, 145.9, 145.8, 145.76, 144.9(2C), 144.8, 144.2, 144.18, 144.0, 143.8(2C), 143.7, 143.6, 143.5(2C), 143.46(3C), 143.4, 143.2, 143.1, 142.7, 142.6, 142.6, 142.59, 142.5, 142.4, 142.35, 142.2, 142.16(2C), 142.1, 142.0, 141.8(2C), 141.6, 141.5, 140.3, 140.1, 140.0, 138.9, 138.7, 136.8, 136.76, 135.3(aryl C), 126.7(aryl C), 125.6(aryl C), 124.3(aryl C), 121.9(aryl C), 113.58(aryl C), 113.37(aryl C), 112.90(aryl C), 79.98(*sp*<sup>3</sup>-C of C<sub>60</sub>), 66.66(-OCH<sub>2</sub>-), 55.3(*sp*<sup>3</sup>-C of C<sub>60</sub>), 32.0(-CH<sub>2</sub>-), 19.3(-CH<sub>2</sub>-), 13.7(-CH<sub>3</sub>); HRMS (MALDI-TOF-MS, DCTB as matrix, negative mode): *m/z* [M]<sup>-</sup> calcd for C<sub>72</sub>H<sub>14</sub>BrNO 987.0259; found 987.0263.

### Synthesis of 5hd

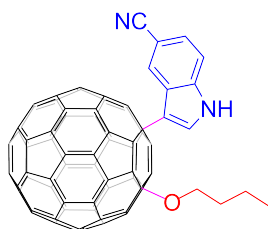

**5hd**

C<sub>60</sub> (36.0 mg, 0.05 mmol), indole-5-carbonitrile (8.6 mg, 0.06 mmol), KO<sup>t</sup>Bu (11.2 mg, 0.1 mmol) were dissolved in chlorobenzene (8 mL) at room temperature under Ar atmosphere. Then DMSO (2 mL) was added to the mixture and the color of the solution changed gradually from purple to dark green. After being stirred for 30

minutes, CF<sub>3</sub>SO<sub>3</sub>H (90 µL, 1 mmol) was added to the mixture and the color changed from dark green to yellowish brown. And after being stirred for 10 minutes, DDQ (56 mg, 0.25 mmol) and CH<sub>3</sub>CH<sub>2</sub>CH<sub>2</sub>CH<sub>2</sub>OH (92 µL, 1 mmol) were added to the mixture and stirred in an oil bath at 100 °C for 60 minutes. The mixture was cooled to room temperature and then added 20 mL carbon disulfide. Resulting dark-yellow solution was washed with water and then evaporated in vacuo. The residue was separated on a silica gel column with carbon disulfide/dichloromethane (1:1) as the eluent to give unreacted C<sub>60</sub> (6.4 mg, 18%) and **5hd** (16.5 mg, 35%) as black amorphous solid. <sup>1</sup>H NMR (400 MHz, CS<sub>2</sub>/d<sub>6</sub>-DMSO) δ 12.02 (s, N-H, 1H), 8.87 (s, 1H), 8.01 (s, 1H), 7.67 (d, *J* = 8.4 Hz, 1H), 7.47 (d, *J* = 8.4 Hz, 1H), 4.48 (t, *J* = 6.0 Hz, 2H), 1.97 (t, *J* = 7.2 Hz, 2H), 1.59 (q, *J* = 7.2 Hz, 2H), 1.04 (t, *J* = 7.2 Hz, 3H); <sup>13</sup>C NMR (100 MHz, CS<sub>2</sub>/d<sub>6</sub>-DMSO) (all 1C unless indicated) δ 154.0, 153.4, 151.2, 149.4, 148.1, 147.7, 147.0, 146.7, 146.5, 146.4, 146.2, 146.2, 146.17(2C), 145.9, 145.8(2C), 144.9, 144.91, 144.8, 144.2, 144.1, 143.9, 143.8, 143.7(2C), 143.5, 143.47(2C), 143.4(3C), 143.3, 143.2, 142.9, 142.7, 142.6, 142.58(2C), 142.5, 142.4, 142.3, 142.2, 142.17, 142.15, 142.0, 141.95, 141.8(2C), 141.6, 141.5, 140.3, 140.2, 140.0, 139.0, 138.6, 138.2, 136.8, 136.8(aryl C), 126.8(aryl C), 124.8(2C, aryl C), 124.1(aryl C), 119.2(-CN), 114.9(aryl C), 112.8(aryl C), 102.6(aryl C), 79.9(*sp*<sup>3</sup>-C of C<sub>60</sub>), 66.6(-OCH<sub>2</sub>-), 55.0(*sp*<sup>3</sup>-C of C<sub>60</sub>), 31.9(-CH<sub>2</sub>-), 19.3(-CH<sub>2</sub>-), 13.7(-CH<sub>3</sub>); HRMS (MALDI-TOF-MS, DCTB as matrix, negative mode): *m/z* [*M*]<sup>-</sup> calcd for C<sub>73</sub>H<sub>14</sub>N<sub>2</sub>O 934.1106; found 934.1109.

### Synthesis of **5id**

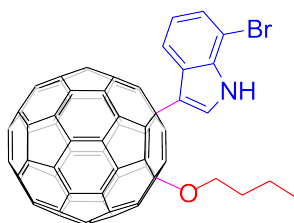

**5id**

C<sub>60</sub> (36.0 mg, 0.05 mmol), 7-bromoindole (12 mg, 0.06 mmol), KO<sup>t</sup>Bu (11.2 mg, 0.1 mmol) were dissolved in chlorobenzene (8 mL) at room temperature under Ar atmosphere. Then DMSO (2 mL) was added to the mixture and the color of the solution changed gradually from purple to dark green. After being stirred for 30 minutes, CF<sub>3</sub>SO<sub>3</sub>H (90 µL, 1 mmol) was added to the mixture and the color changed from dark green to yellowish brown. And after being stirred for 10 minutes, DDQ (56 mg, 0.25 mmol) and CH<sub>3</sub>CH<sub>2</sub>CH<sub>2</sub>CH<sub>2</sub>OH (92 µL, 1 mmol) were added to the mixture and stirred in an oil bath at 100 °C for 60 minutes. The mixture was cooled to room temperature and then added 20 mL carbon disulfide. Resulting dark-yellow solution was washed with water and then evaporated in vacuo. The residue was separated on a silica gel column with carbon disulfide as the eluent to give unreacted C<sub>60</sub> (6.1 mg, 17%) and **5id** (21.3 mg, 43%) as black amorphous solid. <sup>1</sup>H NMR (400 MHz, CS<sub>2</sub>/d<sub>6</sub>-DMSO) δ 11.51 (s, N-H, 1H), 8.43 (d, *J* = 8.0 Hz, 1H), 7.88 (d, *J* = 2.8 Hz, 1H), 7.39 (d, *J* = 7.2 Hz, 1H), 7.07 (t, *J* = 7.6 Hz, 1H), 4.42 (td, *J* = 6.4, 2.4 Hz, 2H),

1.96-1.89 (m, 2H), 1.64-1.55 (m, 2H), 1.04 (t,  $J = 7.2$  Hz, 3H);  $^{13}\text{C}$  NMR (100 MHz,  $\text{CS}_2/d_6\text{-DMSO}$ ) (all 1C unless indicated)  $\delta$  154.4, 153.7, 151.6, 149.6, 148.1, 147.6, 147.1, 146.9, 146.5, 146.4, 146.38, 146.2, 146.16, 146.15, 145.9, 145.8, 145.7, 144.9(2C), 144.8, 144.2, 144.17, 144.0, 143.8, 143.7, 143.65, 143.5, 143.45(2C), 143.4(2C), 143.37(2C), 143.2, 143.1, 142.7, 142.6(2C), 142.5, 142.5, 142.4, 142.35, 142.2, 142.1(2C), 142.0(2C), 141.8, 141.7, 141.6, 141.4, 140.3, 140.2, 139.9, 138.9, 138.7, 136.8(2C), 135.0(aryl C), 126.8(aryl C), 125.5(aryl C), 124.1(aryl C), 120.2(aryl C), 119.1(aryl C), 115.1(aryl C), 105.1(aryl C), 80.0( $sp^3\text{-C}$  of  $\text{C}_{60}$ ), 66.6( $-\text{OCH}_2-$ ), 55.5( $sp^3\text{-C}$  of  $\text{C}_{60}$ ), 32.0( $-\text{CH}_2-$ ), 19.3( $-\text{CH}_2-$ ), 13.7( $-\text{CH}_3$ ); HRMS (MALDI-TOF-MS, DCTB as matrix, negative mode):  $m/z$   $[\text{M}]^-$  calcd for  $\text{C}_{72}\text{H}_{14}\text{BrNO}$  987.0259; found 987.0261.

### Synthesis of 5ld

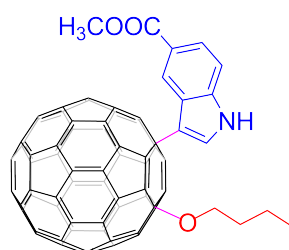

**5ld**

$\text{C}_{60}$  (36.0 mg, 0.05 mmol), methyl indole-5-carboxylate (10.2 mg, 0.06 mmol), KO<sup>t</sup>Bu (11.2 mg, 0.1 mmol) were dissolved in chlorobenzene (8 mL) at room temperature under Ar atmosphere. Then DMSO (2 mL) was added to the mixture and the color of the solution changed gradually from purple to dark green. After being stirred for 30 minutes,  $\text{CF}_3\text{SO}_3\text{H}$  (90  $\mu\text{L}$ , 1 mmol) was added to the mixture and the color changed from dark green to yellowish brown. And after being stirred for 10 minutes, DDQ (34 mg, 0.15 mmol) and  $\text{CH}_3\text{CH}_2\text{CH}_2\text{CH}_2\text{OH}$  (92  $\mu\text{L}$ , 1 mmol) were added to the mixture and stirred in an oil bath at 120 °C for 30 minutes. The mixture was cooled to room temperature and then added 20 mL carbon disulfide. Resulting dark-yellow solution was washed with water and then evaporated in vacuo. The residue was separated on a silica gel column with carbon disulfide/dichloromethane (1:1) as the eluent to give unreacted  $\text{C}_{60}$  (7.5 mg, 21%) and **5ld** (19.5 mg, 40%) as black amorphous solid.  $^1\text{H}$  NMR (400 MHz,  $\text{CS}_2/d_6\text{-DMSO}$ )  $\delta$  11.71 (s, N-H, 1H), 9.02 (s, 1H), 7.93 (d,  $J = 2.4$  Hz, 1H), 7.88 (dd,  $J = 8.4, 1.2$  Hz, 1H), 7.55 (d,  $J = 8.4$  Hz, 1H), 4.44-4.40 (m, 2H), 3.87 (s, 3H), 1.92-1.85 (m, 2H), 1.60-1.51 (m, 2H), 1.01 (t,  $J = 7.6$  Hz, 3H);  $^{13}\text{C}$  NMR (100MHz,  $\text{CS}_2/d_6\text{-DMSO}$ ) (all 1C unless indicated)  $\delta$  165.8(acyl C), 154.4, 153.7, 151.6, 149.6, 148.1(2C), 147.6, 147.0, 146.9, 146.5, 146.4, 146.38, 146.2, 146.15, 146.1, 145.8(2C), 145.7, 144.9(2C), 144.8, 144.2, 144.15, 144.0, 143.8(3C), 143.6(2C), 143.5, 143.49, 143.45, 143.4(2C), 143.38(3C), 143.2, 143.1, 142.6, 142.60(2C), 142.2, 142.14, 142.1, 142.0(2C), 141.8(2C), 141.5, 141.4, 140.3, 140.2, 139.9, 139.1, 138.9, 138.7, 136.9, 136.8(aryl C), 125.5(aryl C), 124.6(aryl C), 122.7(aryl C), 122.5(aryl C), 121.1(aryl C), 115.4(aryl C), 111.3(aryl C), 80.0( $sp^3\text{-C}$  of  $\text{C}_{60}$ ), 66.6( $-\text{OCH}_2-$ ), 55.3( $sp^3\text{-C}$  of  $\text{C}_{60}$ ), 50.6( $-\text{CH}_3$ ), 31.9( $-\text{CH}_2-$ ), 19.2( $-\text{CH}_2-$ ),

13.6(-CH<sub>3</sub>); HRMS (MALDI-TOF-MS, DCTB as matrix, negative mode):  $m/z$  [M]<sup>-</sup> calcd for C<sub>74</sub>H<sub>17</sub>NO<sub>3</sub> 967.1208; found 967.1213.

### Synthesis of 5ae

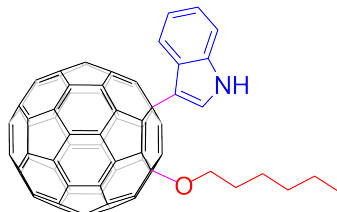

**5ae**

C<sub>60</sub> (36.0 mg, 0.05 mmol), indole (7.2 mg, 0.06 mmol), KO<sup>t</sup>Bu (11.2 mg, 0.1 mmol) were dissolved in chlorobenzene (8 mL) at room temperature under Ar atmosphere. Then DMSO (2 mL) was added to the mixture and the color of the solution changed gradually from purple to dark green. After being stirred for 30 minutes, CF<sub>3</sub>SO<sub>3</sub>H (90 μL, 1 mmol) was added to the mixture and the color changed from dark green to yellowish brown. And after being stirred for 10 minutes, DDQ (56 mg, 0.25 mmol) and CH<sub>3</sub>(CH<sub>2</sub>)<sub>5</sub>OH (126 μL, 1 mmol) were added to the mixture and stirred in an oil bath at 110 °C for 60 minutes. The mixture was cooled to room temperature and then added 20 mL carbon disulfide. Resulting dark-yellow solution was washed with water and then evaporated in vacuo. The residue was separated on a silica gel column with carbon disulfide/dichloromethane (2:1) as the eluent to give unreacted C<sub>60</sub> (7.8 mg, 22%) and **5ae** (19 mg, 41%) as black amorphous solid. <sup>1</sup>H NMR (400 MHz, CS<sub>2</sub>/d<sub>6</sub>-DMSO) δ 11.27 (s, N-H, 1H), 8.40 (d, *J* = 7.6 Hz, 1H), 7.78 (t, *J* = 0.8 Hz, 1H), 7.49 (d, *J* = 8.0 Hz, 1H), 7.20 (t, *J* = 7.6 Hz, 1H), 7.13 (t, *J* = 7.6 Hz, 1H), 4.42-4.38 (m, 2H), 1.95-1.88 (m, 2H), 1.53 (t, *J* = 6.0 Hz, 2H), 1.39 (t, *J* = 3.6 Hz, 4H), 0.97 (t, *J* = 6.4 Hz, 3H); <sup>13</sup>C NMR (100 MHz, CS<sub>2</sub>/d<sub>6</sub>-DMSO) (all 1C unless indicated) δ 155.0, 154.2, 152.0, 149.8, 148.1, 147.6, 147.1, 147.0, 146.6, 146.5, 146.4, 146.2, 146.15, 146.1, 145.8(2C), 145.7, 144.9(2C), 144.7, 144.2, 144.1, 144.0, 143.8, 143.79, 143.6, 143.56, 143.5(2C), 143.44(2C), 143.4, 143.3, 143.23, 143.2, 142.7, 142.6(2C), 142.54, 142.5, 142.4, 142.3, 142.1(3C), 142.0(2C), 141.8, 141.7, 141.6, 141.5, 140.3, 140.0, 139.8, 138.8, 138.78, 136.7, 136.66, 136.6(aryl C), 125.1(aryl C), 123.9(aryl C), 121.5(aryl C), 119.7(aryl C), 119.1(aryl C), 114.0(aryl C), 111.7(aryl C), 80.0(*sp*<sup>3</sup>-C of C<sub>60</sub>), 67.0(-OCH<sub>2</sub>-), 55.7(*sp*<sup>3</sup>-C of C<sub>60</sub>), 31.3(-CH<sub>2</sub>-), 29.9(-CH<sub>2</sub>-), 25.6(-CH<sub>2</sub>-), 22.5(-CH<sub>2</sub>-), 13.9(-CH<sub>3</sub>); HRMS (MALDI-TOF-MS, DCTB as matrix, negative mode):  $m/z$  [M]<sup>-</sup> calcd for C<sub>74</sub>H<sub>19</sub>NO 937.1467; found 937.1471.

### Synthesis of 5ge

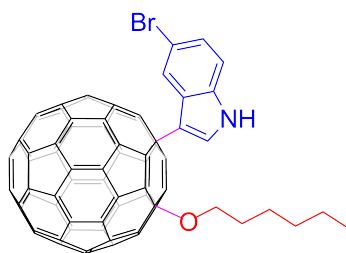

**5ge**

C<sub>60</sub> (36.0 mg, 0.05 mmol), 5-bromoindole (12 mg, 0.06 mmol), KO<sup>t</sup>Bu (11.2 mg, 0.1 mmol) were dissolved in chlorobenzene (8 mL) at room temperature under Ar atmosphere. Then DMSO (2 mL) was added to the mixture and the color of the solution changed gradually from purple to dark green. After being stirred for 30 minutes, CF<sub>3</sub>SO<sub>3</sub>H (90 μL, 1 mmol) was added to the mixture and the color changed from dark green to yellowish brown. And after being stirred for 10 minutes, DDQ (56 mg, 0.25 mmol) and CH<sub>3</sub>(CH<sub>2</sub>)<sub>5</sub>OH (126 μL, 1 mmol) were added to the mixture and stirred in an oil bath at 100 °C for 60 minutes. The mixture was cooled to room temperature and then added 20 mL carbon disulfide. Resulting dark-yellow solution was washed with water and then evaporated in vacuo. The residue was separated on a silica gel column with carbon disulfide/dichloromethane (2:1) as the eluent to give unreacted C<sub>60</sub> (3.2 mg, 9%) and **5ge** (24 mg, 47%) as black amorphous solid. <sup>1</sup>H NMR (400 MHz, CS<sub>2</sub>/d<sub>6</sub>-DMSO) δ 11.59 (s, N-H, 1H), 8.49 (s, 1H), 7.85 (d, *J* = 2.4 Hz, 1H), 7.45 (d, *J* = 8.8 Hz, 1H), 7.29 (d, *J* = 8.4 Hz, 1H), 4.42 (t, *J* = 6.8 Hz, 2H), 1.98-1.91 (m, 2H), 1.56-1.49 (m, 2H), 1.38 (t, *J* = 3.2 Hz, 4H), 0.96 (t, *J* = 6.8 Hz, 3H); <sup>13</sup>C NMR (100 MHz, CS<sub>2</sub>/d<sub>6</sub>-DMSO) (all 1C unless indicated) δ 154.5, 153.7, 151.6, 149.6, 148.1, 147.6, 147.1, 146.9, 146.6, 146.4, 146.29, 146.2, 146.18, 146.16, 145.9, 145.8, 145.75, 144.9(2C), 144.8, 144.2, 144.19, 144.0, 143.8(2C), 143.7, 143.6, 143.5(2C), 143.46(2C), 143.4, 143.39, 143.2, 143.1, 142.7, 142.6, 142.61, 142.6, 142.5, 142.4, 142.35, 142.2, 142.16(2C), 142.1, 142.0, 141.8(2C), 141.6, 141.5, 140.3, 140.1, 139.9, 138.9, 138.7, 136.8, 136.7, 135.3(aryl C), 126.7(aryl C), 125.5(aryl C), 124.3(aryl C), 121.9(aryl C), 113.6(aryl C), 113.3(aryl C), 112.9(aryl C), 80.0(*sp*<sup>3</sup>-C of C<sub>60</sub>), 67.0(-OCH<sub>2</sub>-), 55.3(*sp*<sup>3</sup>-C of C<sub>60</sub>), 31.3(-CH<sub>2</sub>-), 30.0(-CH<sub>2</sub>-), 25.6(-CH<sub>2</sub>-), 22.5(-CH<sub>2</sub>-), 13.9(-CH<sub>3</sub>); HRMS (MALDI-TOF-MS, DCTB as matrix, negative mode): *m/z* [M]<sup>-</sup> calcd for C<sub>74</sub>H<sub>18</sub>BrNO 1015.0572; found 1015.0574.

### Synthesis of 5he

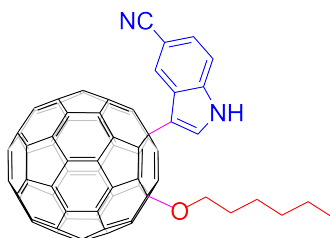

**5he**

C<sub>60</sub> (36.0 mg, 0.05 mmol), indole-5-carbonitrile (8.6 mg, 0.06 mmol), KO<sup>t</sup>Bu (11.2 mg, 0.1 mmol) were dissolved in chlorobenzene (8 mL) at room temperature under Ar atmosphere. Then DMSO (2 mL) was added to the mixture and the color of the

solution changed gradually from purple to dark green. After being stirred for 30 minutes, CF<sub>3</sub>SO<sub>3</sub>H (90 µL, 1 mmol) was added to the mixture and the color changed from dark green to yellowish brown. And after being stirred for 10 minutes, DDQ (56 mg, 0.25 mmol) and CH<sub>3</sub>(CH<sub>2</sub>)<sub>5</sub>OH (126 µL, 1 mmol) were added to the mixture and stirred in an oil bath at 110 °C for 60 minutes. The mixture was cooled to room temperature and then added 20 mL carbon disulfide. Resulting dark-yellow solution was washed with water and then evaporated in vacuo. The residue was separated on a silica gel column with carbon disulfide/dichloromethane (1:1) as the eluent to give unreacted C<sub>60</sub> (8 mg, 22%) and **5he** (19.9 mg, 41%) as black amorphous solid. <sup>1</sup>H NMR (400 MHz, CS<sub>2</sub>/d<sub>6</sub>-DMSO) δ 11.99 (s, N-H, 1H), 8.89 (s, 1H), 8.00 (d, *J* = 2.4 Hz, 1H), 7.67 (d, *J* = 8.4 Hz, 1H), 7.47 (dd, *J* = 8.8, 1.6 Hz, 1H), 4.47 (t, *J* = 6.4 Hz, 2H), 2.02-1.95 (m, 2H), 1.58-1.50 (m, 2H), 1.41-1.37 (m, 4H), 0.96 (t, *J* = 6.8 Hz, 3H); <sup>13</sup>C NMR (100 MHz, CS<sub>2</sub>/d<sub>6</sub>-DMSO) (all 1C unless indicated) δ 154.1, 153.4, 151.2, 149.4, 148.2, 147.7, 147.0, 146.8, 146.6, 146.4, 146.3, 146.22, 146.2, 146.18, 145.9, 145.8, 145.78, 145.0, 144.9, 144.8, 144.3, 144.2, 143.9, 143.8, 143.7, 143.68, 143.6, 143.51, 143.5, 143.4(3C), 143.38, 143.2, 142.9, 142.7, 142.66, 142.6(2C), 142.5, 142.4, 142.35, 142.3, 142.2, 142.18, 142.1, 142.0, 141.8(2C), 141.6, 141.5, 140.3, 140.26, 140.0, 139.0, 138.7, 138.3(2C), 136.9(aryl C), 136.8(aryl C), 126.8(aryl C), 124.8(aryl C), 124.1(aryl C), 119.3(-CN), 114.9(aryl C), 112.9(aryl C), 102.6(aryl C), 79.9(*sp*<sup>3</sup>-C of C<sub>60</sub>), 67.0(-OCH<sub>2</sub>-), 55.0(*sp*<sup>3</sup>-C of C<sub>60</sub>), 31.23(-CH<sub>2</sub>-), 29.9(-CH<sub>2</sub>-), 25.6(-CH<sub>2</sub>-), 22.5(-CH<sub>2</sub>-), 13.9(-CH<sub>3</sub>); HRMS (MALDI-TOF-MS, DCTB as matrix, negative mode): *m/z* [M]<sup>-</sup> calcd for C<sub>75</sub>H<sub>18</sub>N<sub>2</sub>O 962.1419; found 962.1424.

### Synthesis of **5ie**

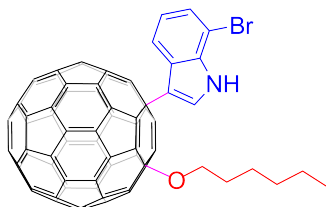

**5ie**

C<sub>60</sub> (36.0 mg, 0.05 mmol), 7-bromoindole (12 mg, 0.06 mmol), KO<sup>t</sup>Bu (11.2 mg, 0.1 mmol) were dissolved in chlorobenzene (8 mL) at room temperature under Ar atmosphere. Then DMSO (2 mL) was added to the mixture and the color of the solution changed gradually from purple to dark green. After being stirred for 30 minutes, CF<sub>3</sub>SO<sub>3</sub>H (90 µL, 1 mmol) was added to the mixture and the color changed from dark green to yellowish brown. And after being stirred for 10 minutes, DDQ (56 mg, 0.25 mmol) and CH<sub>3</sub>(CH<sub>2</sub>)<sub>5</sub>OH (126 µL, 1 mmol) were added to the mixture and stirred in an oil bath at 100 °C for 60 minutes. The mixture was cooled to room temperature and then added 20 mL carbon disulfide. Resulting dark-yellow solution was washed with water and then evaporated in vacuo. The residue was separated on a silica gel column with carbon disulfide/dichloromethane (2:1) as the eluent to give unreacted C<sub>60</sub> (7.1 mg, 20%) and **5ie** (29.4 mg, 58%) as black amorphous solid. <sup>1</sup>H NMR (400 MHz, CS<sub>2</sub>/d<sub>6</sub>-DMSO) δ 11.49 (s, N-H, 1H), 8.44 (d, *J* = 8.0 Hz, 1H), 7.88



(d,  $J = 2.4$  Hz, 1H), 7.38 (d,  $J = 7.6$  Hz, 1H), 7.07 (d,  $J = 7.6$  Hz, 1H), 4.40 (td,  $J = 6.8$ , 2.8 Hz, 2H), 1.95-1.88 (m, 2H), 1.56-1.49 (m, 2H), 1.39-1.35 (m, 4H), 0.96 (t,  $J = 6.8$  Hz, 3H);  $^{13}\text{C}$  NMR (100 MHz,  $\text{CS}_2/d_6\text{-DMSO}$ ) (all 1C unless indicated)  $\delta$  154.5, 153.7, 151.6, 149.6, 148.1, 147.6, 147.1, 146.9, 146.6, 146.4, 146.3, 146.2, 146.16, 146.1, 145.9, 145.8, 145.7, 144.9(2C), 144.8, 144.2, 144.17, 143.9, 143.8, 143.7, 143.65, 143.5, 143.44(3C), 143.4, 143.36(2C), 143.2, 143.1, 142.7, 142.6(2C), 142.52, 142.5, 142.4, 142.35, 142.2, 142.1(2C), 142.0(2C), 141.8, 141.7, 141.5, 141.4, 140.3, 140.16, 139.9, 138.8, 138.7, 136.8, 136.8, 135.0(aryl C), 126.8(aryl C), 125.5(aryl C), 124.1(aryl C), 120.2(aryl C), 119.1(aryl C), 115.1(aryl C), 105.1(aryl C), 80.0( $sp^3$ -C of  $\text{C}_{60}$ ), 67.0(- $\text{OCH}_2$ -), 55.4( $sp^3$ -C of  $\text{C}_{60}$ ), 31.3(- $\text{CH}_2$ -), 29.9(- $\text{CH}_2$ -), 25.6(- $\text{CH}_2$ -), 22.5(- $\text{CH}_2$ -), 13.9(- $\text{CH}_3$ ); HRMS (MALDI-TOF-MS, DCTB as matrix, negative mode):  $m/z$   $[\text{M}]^-$  calcd for  $\text{C}_{74}\text{H}_{18}\text{BrNO}$  1015.0572; found 1015.0576.

### Synthesis of 5le

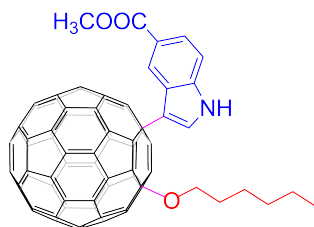

5le

$\text{C}_{60}$  (36.0 mg, 0.05 mmol), methyl indole-5-carboxylate (10.2 mg, 0.06 mmol), KO<sup>t</sup>Bu (11.2 mg, 0.1 mmol) were dissolved in chlorobenzene (8 mL) at room temperature under Ar atmosphere. Then DMSO (2 mL) was added to the mixture and the color of the solution changed gradually from purple to dark green. After being stirred for 30 minutes,  $\text{CF}_3\text{SO}_3\text{H}$  (90  $\mu\text{L}$ , 1 mmol) was added to the mixture and the color changed from dark green to yellowish brown. And after being stirred for 10 minutes, DDQ (34 mg, 0.15 mmol) and  $\text{CH}_3(\text{CH}_2)_5\text{OH}$  (126  $\mu\text{L}$ , 1 mmol) were added to the mixture and stirred in an oil bath at 120  $^\circ\text{C}$  for 30 minutes. The mixture was cooled to room temperature and then added 20 mL carbon disulfide. Resulting dark-yellow solution was washed with water and then evaporated in vacuo. The residue was separated on a silica gel column with carbon disulfide/dichloromethane (1:1) as the eluent to give unreacted  $\text{C}_{60}$  (5.1 mg, 14%) and **5le** (20 mg, 40%) as black amorphous solid.  $^1\text{H}$  NMR (400 MHz,  $\text{CS}_2/d_6\text{-DMSO}$ )  $\delta$  11.75 (s, N-H, 1H), 9.03 (s, 1H), 7.93 (s, 1H), 7.88 (d,  $J = 8.0$  Hz, 1H), 7.56 (d,  $J = 8.0$  Hz, 1H), 4.42-4.38 (m, 2H), 3.87 (s, 3H), 1.91-1.95 (m, 2H), 1.50 (t,  $J = 7.6$  Hz, 2H), 1.35 (s, 4H), 0.95 (t,  $J = 5.8$  Hz, 3H);  $^{13}\text{C}$  NMR (100 MHz,  $\text{CS}_2/d_6\text{-DMSO}$ ) (all 1C unless indicated)  $\delta$  165.9(acyl C), 154.5, 153.7, 151.6, 149.7, 148.1, 147.6, 147.1, 146.9, 146.6, 146.4, 146.38, 146.2, 146.18, 146.1, 145.9(2C), 145.8, 144.9(2C), 144.8(2C), 144.2, 144.19(2C), 144.0, 143.8(2C), 143.7, 143.6, 143.5, 143.47(3C), 143.4(2C), 143.2, 143.1, 142.6(2C), 142.58, 142.5, 142.4, 142.36, 142.2, 142.17(2C), 142.0(2C), 141.8(2C), 141.6, 141.5, 140.3, 140.2, 140.0, 139.2, 138.9, 138.7, 136.8(aryl C), 125.5(aryl C), 124.6(aryl C), 122.7(aryl C), 122.5(aryl C), 121.1(aryl C), 115.4(aryl C), 111.4(aryl C), 80.0( $sp^3$ -C of  $\text{C}_{60}$ ), 67.0(- $\text{OCH}_2$ -), 55.3( $sp^3$ -C of  $\text{C}_{60}$ ), 50.7(- $\text{OCH}_3$ ), 32.7(- $\text{CH}_2$ -), 31.3(- $\text{CH}_2$ -),

25.6(-CH<sub>2</sub>-), 22.5(-CH<sub>2</sub>-), 13.9(-CH<sub>3</sub>); HRMS (MALDI-TOF-MS, DCTB as matrix, negative mode): *m/z* [M]<sup>-</sup> calcd for C<sub>76</sub>H<sub>21</sub>NO<sub>3</sub> 995.1521; found 995.1524.

### Synthesis of **5gi**

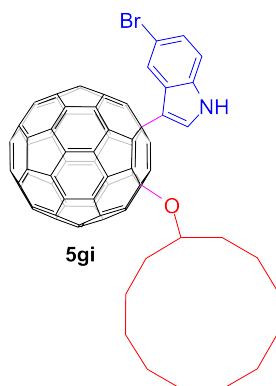

C<sub>60</sub> (36.0 mg, 0.05 mmol), 5-bromoindole (12 mg, 0.06 mmol), KO<sup>t</sup>Bu (11.2 mg, 0.1 mmol) were dissolved in chlorobenzene (8 mL) at room temperature under Ar atmosphere. Then DMSO (4 mL) was added to the mixture and the color of the solution changed gradually from purple to dark green. After being stirred for 30 minutes, CF<sub>3</sub>SO<sub>3</sub>H (90 μL, 1 mmol) was added to the mixture and the color changed from dark green to yellowish brown. And after being stirred for 10 minutes, DDQ (56 mg, 0.25 mmol) and cyclododecanol (184 mg, 1 mmol) were added to the mixture and stirred in an oil bath at 100 °C for 60 minutes. The mixture was cooled to room temperature and then added 20 mL carbon disulfide. Resulting dark-yellow solution was washed with water and then evaporated in vacuo. The residue was separated on a silica gel column with carbon disulfide/dichloromethane (2:1) as the eluent to give unreacted C<sub>60</sub> (4.1mg, 11%) and **5gi** (30 mg, 55%) as black amorphous solid. <sup>1</sup>H NMR (400 MHz, CS<sub>2</sub>/Acetone-*d*<sub>6</sub>) δ 10.73 (s, N-H, 1H), 8.61 (s, 1H), 7.91 (s, 1H), 7.42 (d, *J* = 8.4 Hz, 1H), 7.30 (d, *J* = 8.8 Hz, 1H), 4.91 (s, 1H), 1.55-1.32 (m, 22H); <sup>13</sup>C NMR (100 MHz, CS<sub>2</sub>/d<sub>6</sub>-DMSO) (all 1C unless indicated) δ 154.5, 153.4, 151.0, 150.2, 148.1, 147.6, 147.3, 147.0, 146.8, 146.4, 146.4, 146.2(3C), 145.9, 145.8, 145.6, 144.9, 144.8(2C), 144.2, 144.15, 144.0, 143.8, 143.76, 143.7, 143.6, 143.5, 143.44(2C), 143.4(2C), 143.3, 143.2, 143.15, 142.7(4C), 142.5, 142.4(2C), 142.2, 142.17(2C), 142.1, 142.0, 141.84, 141.8, 141.6, 141.4, 140.7, 140.3, 139.9, 138.7, 138.5, 136.7, 136.7, 135.3(aryl C), 126.7(aryl C), 125.5(aryl C), 124.3(aryl C), 122.0(aryl C), 113.6(aryl C), 113.2(aryl C), 112.9(aryl C), 79.5(*sp*<sup>3</sup>-C of C<sub>60</sub>), 74.2(-OCH-), 55.3(*sp*<sup>3</sup>-C of C<sub>60</sub>), 31.2, 31.1, 29.7, 29.4, 23.9, 23.9, 23.5, 23.3, 23.2, 21.2, 21.1; HRMS (MALDI-TOF-MS, DCTB as matrix, negative mode): *m/z* [M]<sup>-</sup> calcd for C<sub>80</sub>H<sub>28</sub>BrNO 1097.1354; found 1097.1356.

### Synthesis of **5gf**



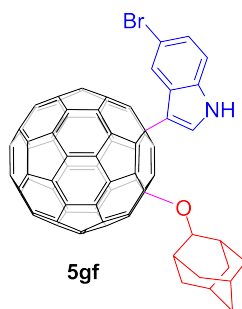

C<sub>60</sub> (36.0 mg, 0.05 mmol), 5-bromoindole (12 mg, 0.06 mmol), KO<sup>t</sup>Bu (11.2 mg, 0.1 mmol) were dissolved in chlorobenzene (8 mL) at room temperature under Ar atmosphere. Then DMSO (4 mL) was added to the mixture and the color of the solution changed gradually from purple to dark green. After being stirred for 30 minutes, CF<sub>3</sub>SO<sub>3</sub>H (90 μL, 1 mmol) was added to the mixture and the color changed from dark green to yellowish brown. And after being stirred for 10 minutes, DDQ (56 mg, 0.25 mmol) and 2-adamantanol (152 mg, 1 mmol) were added to the mixture and stirred in an oil bath at 100 °C for 60 minutes. The mixture was cooled to room temperature and then added 20 mL carbon disulfide. Resulting dark-yellow solution was washed with water and then evaporated in vacuo. The residue was separated on a silica gel column with carbon disulfide as the eluent to give unreacted C<sub>60</sub> (3.9 mg, 11%) and **5gf** (19.4 mg, 36%) as black amorphous solid. <sup>1</sup>H NMR (400 MHz, CS<sub>2</sub>/d<sub>6</sub>-DMSO) δ 11.70 (s, N-H, 1H), 8.38 (s, 1H), 7.95 (s, 1H), 7.51 (d, *J* = 8.6 Hz, 1H), 7.33 (d, *J* = 8.6 Hz, 1H), 4.84 (s, 1H), 2.39 (s, 2H), 1.97-1.87 (m, 6H), 1.67 (t, *J* = 8.6 Hz, 2H), 1.55 (d, *J* = 11.6 Hz, 2H), 1.36 (s, 2H); <sup>13</sup>C NMR (100 MHz, CS<sub>2</sub>/d<sub>6</sub>-DMSO) (all 1C unless indicated) δ 154.6, 153.7, 151.1, 150.4, 148.1, 147.6, 147.4, 147.0, 146.9, 146.4, 146.3, 146.2, 146.19, 146.1, 145.9, 145.8, 145.7, 144.9, 144.8(2C), 144.3, 144.2, 143.9(2C), 143.8, 143.7, 143.6, 143.54, 143.5, 143.47, 143.4(2C), 143.3, 143.2, 143.16, 142.8, 142.7, 142.6, 142.55, 142.5, 142.4, 142.38, 142.3, 142.2, 142.17, 142.1, 142.06, 141.83, 141.82, 141.6, 141.4, 140.9, 140.4, 139.9, 138.6, 138.4, 137.1, 136.8, 135.3(aryl C), 126.7(aryl C), 125.3(aryl C), 124.29(aryl C), 121.8(aryl C), 113.8(aryl C), 113.4(aryl C), 113.0(aryl C), 79.5(*sp*<sup>3</sup>-C of C<sub>60</sub>), 78.9, 55.2(*sp*<sup>3</sup>-C of C<sub>60</sub>), 37.3, 36.3(2C), 34.1, 34.0, 31.4, 31.4, 27.37, 27.0; HRMS (MALDI-TOF-MS, DCTB as matrix, negative mode): *m/z* [M]<sup>-</sup> calcd for C<sub>78</sub>H<sub>20</sub>BrNO 1065.0728; found 1065.0732.

### Synthesis of 5gh

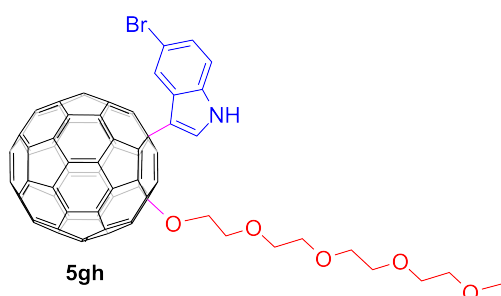

C<sub>60</sub> (36.0 mg, 0.05 mmol), 5-bromoindole (12 mg, 0.06 mmol), KO<sup>t</sup>Bu (11.2 mg, 0.1 mmol) were dissolved in chlorobenzene (8 mL) at room temperature under Ar

atmosphere. Then DMSO (4 mL) was added to the mixture and the color of the solution changed gradually from purple to dark green. After being stirred for 30 minutes, CF<sub>3</sub>SO<sub>3</sub>H (90 µL, 1 mmol) was added to the mixture and the color changed from dark green to yellowish brown. And after being stirred for 10 minutes, DDQ (56 mg, 0.25 mmol) and methyl tetraglycol (210 µL, 1 mmol) were added to the mixture and stirred in an oil bath at 100 °C for 60 minutes. The mixture was cooled to room temperature and then added 20 mL carbon disulfide. Resulting dark-yellow solution was washed with water and then evaporated in vacuo. The residue was separated on a silica gel column with carbon disulfide/dichloromethane/ethyl acetate(6:2:1) as the eluent to give unreacted C<sub>60</sub> (4.5 mg, 13%) and **5gh** (18 mg, 32%) as black amorphous solid. <sup>1</sup>H NMR (400 MHz, CS<sub>2</sub>/Acetone-*d*<sub>6</sub>) δ 10.59 (s, N-H, 1H), 8.30 (s, 1H), 8.05 (s, 1H), 7.44 (d, *J* = 8.8 Hz, 1H), 7.24 (d, *J* = 8.4 Hz, 1H), 4.59 (s, 2H), 3.98 – 3.89 (m, 2H), 3.74-3.65 (m, 10H), 3.53 (t, *J* = 4.4 Hz, 2H), 3.28 (s, 3H); <sup>13</sup>C NMR (100 MHz, CS<sub>2</sub>/Acetone-*d*<sub>6</sub>) (all 1C unless indicated) δ 155.3, 154.8, 153.2, 150.0, 149.4, 148.9, 148.2, 147.9, 147.7, 147.65, 147.5, 147.42, 147.4, 147.12, 147.1, 147.0, 146.97, 146.2, 146.17, 146.0, 145.6, 145.3, 145.2, 145.1, 145.0, 144.9, 144.8, 144.76, 144.7, 144.69, 144.67(3C), 144.5, 144.3, 143.9, 143.89, 143.8(3C), 143.7, 143.6, 143.4, 143.3(2C), 143.29(2C), 143.0(2C), 142.8, 142.6, 141.5, 141.4, 140.7, 140.6, 140.1, 138.8, 137.9, 136.3(aryl C), 128.0(aryl C), 127.7(aryl C), 125.5(aryl C), 123.1(aryl C), 114.8(aryl C), 114.3(2C, aryl C), 81.1(*sp*<sup>3</sup>-C of C<sub>60</sub>), 72.4, 71.5, 71.3, 71.3, 71.1, 71.0(2C), 67.7, 59.0(-CH<sub>3</sub>), 56.6(*sp*<sup>3</sup>-C of C<sub>60</sub>); HRMS (MALDI-TOF-MS, DCTB as matrix, negative mode): *m/z* [M]<sup>-</sup> calcd for C<sub>77</sub>H<sub>24</sub>BrNO<sub>5</sub> 1121.0838; found 1121.0842.

### Synthesis of **5gg**

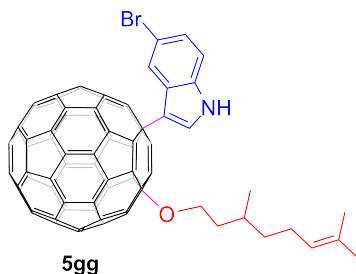

C<sub>60</sub> (36.0 mg, 0.05 mmol), 5-bromoindole (12 mg, 0.06 mmol), KO<sup>t</sup>Bu (11.2 mg, 0.1 mmol) were dissolved in chlorobenzene (8 mL) at room temperature under Ar atmosphere. Then DMSO (4 mL) was added to the mixture and the color of the solution changed gradually from purple to dark green. After being stirred for 30 minutes, CF<sub>3</sub>SO<sub>3</sub>H (90 µL, 1 mmol) was added to the mixture and the color changed from dark green to yellowish brown. And after being stirred for 10 minutes, DDQ (56 mg, 0.25 mmol) and citronellol (182 mg, 1 mmol) were added to the mixture and stirred in an oil bath at 100 °C for 60 minutes. The mixture was cooled to room temperature and then added 20 mL carbon disulfide. Resulting dark-yellow solution was washed with water and then evaporated in vacuo. The residue was separated on a silica gel column with carbon disulfide as the eluent to give unreacted C<sub>60</sub> (4.5 mg, 13%) and **5gg** (18.1 mg, 34%) as black amorphous solid. <sup>1</sup>H NMR (400 MHz, CS<sub>2</sub>/Acetone-*d*<sub>6</sub>) δ 10.61 (s, N-H, 1H), 8.52 (s, 1H), 7.87 (s, 1H), 7.40 (d, *J* = 8.4 Hz,

1H), 7.29 (d,  $J = 8.4$  Hz, 1H), 5.04 (s, 1H), 4.46-4.39 (m, 2H), 1.98 – 1.96 (m, 2H), 1.72 (d,  $J = 8.4$  Hz, 2H), 1.67 (s, 3H), 1.60 (s, 3H), 1.39-1.35 (m, 1H), 1.27 (m, 2H), 0.93 (d,  $J = 5.6$  Hz, 3H);  $^{13}\text{C}$  NMR (100 MHz,  $\text{CS}_2/\text{Acetone-}d_6$ ) (all 1C unless indicated)  $\delta$  155.6, 154.8, 152.7, 150.9, 149.5, 149.0, 148.4, 148.2, 147.9, 147.87, 147.8, 147.6, 147.56, 147.5, 147.49, 147.2, 147.1(2C), 146.3, 146.2, 146.1, 145.6, 145.5, 145.3, 145.1, 145.07, 145.0, 144.9, 144.8(2C), 144.76(3C), 144.7, 144.5, 144.4, 144.0, 143.96(2C), 143.9, 143.85, 143.7(2C), 143.6, 143.5(2C), 143.34, 143.3, 143.1(2C), 142.9, 142.8, 141.7, 141.3, 140.2, 140.0, 138.2, 138.1, 136.5(aryl C), 131.1(alkene C), 128.1(aryl C), 126.3(aryl C), 126.0(aryl C), 125.9(alkene C), 123.4(aryl C), 115.8(aryl C), 114.5(aryl C), 114.1(aryl C), 81.3( $sp^3$ -C of  $\text{C}_{60}$ ), 66.6, 56.5( $sp^3$ -C of  $\text{C}_{60}$ ), 38.0(2C), 30.6, 26.4(2C), 20.2(- $\text{CH}_3$ ), 18.3(- $\text{CH}_3$ ); HRMS (MALDI-TOF-MS, DCTB as matrix, negative mode):  $m/z$   $[\text{M}]^-$  calcd for  $\text{C}_{78}\text{H}_{24}\text{BrNO}$  1069.1041; found 1069.1045.

### Synthesis of **5ij**

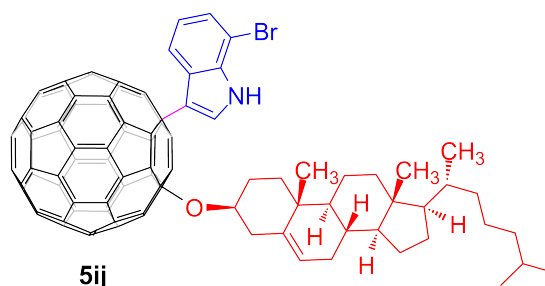

$\text{C}_{60}$  (36.0 mg, 0.05 mmol), 7-bromoindole (12 mg, 0.06 mmol),  $\text{KO}^t\text{Bu}$  (11.2 mg, 0.1 mmol) were dissolved in chlorobenzene (8 mL) at room temperature under Ar atmosphere. Then DMSO (4 mL) was added to the mixture and the color of the solution changed gradually from purple to dark green. After being stirred for 30 minutes,  $\text{CF}_3\text{SO}_3\text{H}$  (90  $\mu\text{L}$ , 1 mmol) was added to the mixture and the color changed from dark green to yellowish brown. And after being stirred for 10 minutes, DDQ (56 mg, 0.25 mmol) and cholesterol (386 mg, 1 mmol) were added to the mixture and stirred in an oil bath at 100  $^\circ\text{C}$  for 60 minutes. The mixture was cooled to room temperature and then added 20 mL carbon disulfide. Resulting dark-yellow solution was washed with water and then evaporated in vacuo. The residue was separated on a silica gel column with carbon disulfide/dichloromethane (2:1) as the eluent to give unreacted  $\text{C}_{60}$  (4.8 mg, 13%) and **5ij** (25.4 mg, 39%) as black amorphous solid.  $^1\text{H}$  NMR (400 MHz,  $\text{CS}_2/\text{Acetone-}d_6$ )  $\delta$  10.44 (s, N-H, 1H), 8.28 (dd,  $J = 7.6, 4.8$  Hz, 1H), 7.87 (s, 1H), 7.30 (d,  $J = 7.6$  Hz, 1H), 6.99 (t,  $J = 7.8$  Hz, 1H), 5.04 (s, 1H), 4.32-4.30 (m, 1H), 2.48-2.45 (m, 2H), 1.93-1.90 (m, 2H), 1.76-1.63 (m, 4H), 1.51-1.00 (m, 20H), 0.94 (s, 3H), 0.86 (d,  $J = 6.4$  Hz, 3H), 0.80 (d,  $J = 6.8$  Hz, 6H), 0.60 (s, 3H);  $^{13}\text{C}$  NMR (100 MHz,  $\text{CS}_2/\text{Acetone-}d_6$ ) (all 1C unless indicated)  $\delta$  156.0, 155.0, 154.8, 152.4, 152.3, 151.7, 149.5, 149.1, 148.8, 148.5, 148.3, 147.8, 147.6(3C), 147.5, 147.3, 147.2, 147.1, 146.3, 146.2(2C), 145.7(2C), 145.2(3C), 144.9(3C), 144.8(3C), 144.6(2C), 144.1, 144.1, 144.0, 143.9(2C), 143.8(2C), 143.7(2C), 143.6, 143.6, 143.4, 143.2, 143.0, 142.8, 142.4, 142.3, 141.8, 141.3, 140.9(alkene C), 140.0, 139.7, 138.6, 138.1, 136.3(aryl C), 127.9(aryl C), 126.1(aryl C), 125.6(aryl C),

122.6(aryl C), 122.0(alkene C), 120.7(aryl C), 117.5(aryl C), 106.2(aryl C), 80.8( $sp^3$ -C of C<sub>60</sub>), 77.9, 57.8, 57.1, 56.6( $sp^3$ -C of C<sub>60</sub>), 50.6, 43.0, 42.0, 40.6, 40.4, 38.3, 37.1, 36.7, 32.8, 32.6, 31.7, 29.0(2C), 25.3, 24.9, 23.5, 23.3(2C, -CH<sub>3</sub>), 21.9, 20.0(-CH<sub>3</sub>), 19.5(-CH<sub>3</sub>), 12.6(-CH<sub>3</sub>); HRMS (MALDI-TOF-MS, DCTB as matrix, negative mode):  $m/z$  [M]<sup>-</sup> calcd for C<sub>95</sub>H<sub>50</sub>BrNO 1299.3076; found 1299.3080.

### Synthesis of 5hj

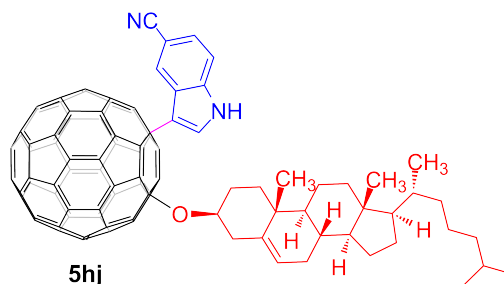

C<sub>60</sub> (36.0 mg, 0.05 mmol), indole-5-carbonitrile (8.6 mg, 0.06 mmol), KO<sup>t</sup>Bu (11.2 mg, 0.1 mmol) were dissolved in chlorobenzene (8 mL) at room temperature under Ar atmosphere. Then DMSO (4 mL) was added to the mixture and the color of the solution changed gradually from purple to dark green. After being stirred for 30 minutes, CF<sub>3</sub>SO<sub>3</sub>H (90  $\mu$ L, 1 mmol) was added to the mixture and the color changed from dark green to yellowish brown. And after being stirred for 10 minutes, DDQ (56 mg, 0.25 mmol) and cholesterol (386 mg, 1 mmol) were added to the mixture and stirred in an oil bath at 100 °C for 60 minutes. The mixture was cooled to room temperature and then added 20 mL carbon disulfide. Resulting dark-yellow solution was washed with water and then evaporated in vacuo. The residue was separated on a silica gel column with carbon disulfide/dichloromethane (2:1) as the eluent to give unreacted C<sub>60</sub> (7.9 mg, 22%) and **5hj** (27.3 mg, 44%) as black amorphous solid. <sup>1</sup>H NMR (400 MHz, CS<sub>2</sub>/Acetone-*d*<sub>6</sub>)  $\delta$  11.08 (s, N-H, 1H), 9.06 (s, 1H), 8.04 (d,  $J$  = 2.0 Hz, 1H), 7.65 (d,  $J$  = 8.4 Hz, 1H), 7.47 (d,  $J$  = 8.4 Hz, 1H), 5.24 (s, 1H), 4.60-4.55 (m, 1H), 2.76-2.62 (m, 2H), 2.21 (m, 1H), 2.04 – 1.85 (m, 5H), 1.55 – 1.14 (m, 17H), 1.10 (s, 3H), 1.06-1.00 (m, 3H), 0.96 (d,  $J$  = 6.4 Hz, 3H), 0.91-0.89 (m, 6H), 0.72 (s, 3H); <sup>13</sup>C NMR (100 MHz, CS<sub>2</sub>/Acetone-*d*<sub>6</sub>) (all 1C unless indicated)  $\delta$  155.3, 154.4, 154.3, 151.9, 151.1, 149.4, 149.0, 148.5, 148.2, 148.1, 147.8, 147.5(2C), 147.4, 147.2, 147.1, 146.9, 146.3, 146.2, 146.15, 145.6, 145.5, 145.0, 144.99, 144.9, 144.8(2C), 144.7(5C), 144.5, 144.2, 144.0, 143.97(2C), 143.9, 143.8, 143.7, 143.6, 143.58, 143.5, 143.4, 143.3, 143.1(2C), 142.9, 142.8, 142.2, 142.2, 141.7, 141.3, 141.1(alkene C), 141.1, 139.9, 139.85, 139.0, 138.4, 138.1(aryl C), 127.7(aryl C), 126.7(aryl C), 126.1(aryl C), 125.7(aryl C), 122.7(aryl C), 120.3(alkene C), 117.1(-CN), 113.7(aryl C), 104.4(aryl C), 80.5( $sp^3$ -C of C<sub>60</sub>), 78.0, 57.5, 56.9, 56.1( $sp^3$ -C of C<sub>60</sub>), 50.8, 43.0, 42.1, 42.0, 40.7, 40.3, 38.4, 37.2, 37.1, 36.6, 32.8, 32.5, 31.7, 28.9, 25.3, 24.7, 23.5(-CH<sub>3</sub>), 23.3(-CH<sub>3</sub>), 21.9, 20.0(-CH<sub>3</sub>), 19.3(-CH<sub>3</sub>), 12.6(-CH<sub>3</sub>); HRMS (MALDI-TOF-MS, DCTB as matrix, negative mode):  $m/z$  [M]<sup>-</sup> calcd for C<sub>96</sub>H<sub>50</sub>N<sub>2</sub>O 1246.3923; found 1246.3926.

### Synthesis of 5lj

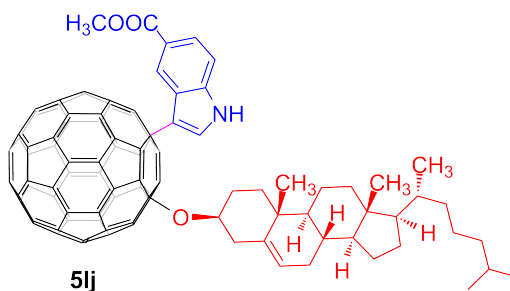

C<sub>60</sub> (36.0 mg, 0.05 mmol), 5-bromoindole (12 mg, 0.06 mmol), KO<sup>t</sup>Bu (11.2 mg, 0.1 mmol) were dissolved in chlorobenzene (8 mL) at room temperature under Ar atmosphere. Then DMSO (4 mL) was added to the mixture and the color of the solution changed gradually from purple to dark green. After being stirred for 30 minutes, CF<sub>3</sub>SO<sub>3</sub>H (90 μL, 1 mmol) was added to the mixture and the color changed from dark green to yellowish brown. And after being stirred for 10 minutes, DDQ (56 mg, 0.25 mmol) and Cholesterol (386 mg, 1 mmol) were added to the mixture and stirred in an oil bath at 100 °C for 60 minutes. The mixture was cooled to room temperature and then added 20 mL carbon disulfide. Resulting dark-yellow solution was washed with water and then evaporated in vacuo. The residue was separated on a silica gel column with carbon disulfide/dichloromethane (2:1) as the eluent to give unreacted C<sub>60</sub> (6.5 mg, 18%) and **5lj** (32.1 mg, 50%) as black amorphous solid. <sup>1</sup>H NMR (400 MHz, CS<sub>2</sub>/Acetone-*d*<sub>6</sub>) δ 10.89 (s, N-H, 1H), 9.11 (s, 1H), 7.99 (s, 1H), 7.90 (d, *J* = 8.6 Hz, 1H), 7.54 (d, *J* = 8.6 Hz, 1H), 5.19 (s, 1H), 4.51- 4.50 (m, 1H), 3.86 (s, 3H), 2.61 – 2.58 (m, 2H), 2.41 – 2.36 (m, 2H), 2.17 (m, 1H), 1.90 – 1.79 (m, 4H), 1.60– 1.40 (m, 19H), 1.05 (s, 3H), 0.97 (d, *J* = 6.0 Hz, 3H), 0.92 (d, *J* = 6.4 Hz, 6H), 0.72(s, 3H); <sup>13</sup>C NMR (100 MHz, CS<sub>2</sub>/Acetone-*d*<sub>6</sub>) (all 1C unless indicated) δ 167.21(acyl C), 155.8, 154.9, 154.8, 152.4, 152.3, 151.5, 149.4, 149.0, 148.6, 148.5, 148.4, 148.2, 147.8, 147.7, 147.6, 147.48, 147.2, 147.1, 147.0, 146.2, 146.16(2C), 145.6, 145.55, 145.1(3C), 145.0, 144.9, 144.8, 144.75(2C), 144.6, 144.5, 144.46, 144.1, 144.0, 143.96, 143.9, 143.8, 143.7, 143.6, 143.5, 143.49, 143.4(2C), 143.1(2C), 142.9, 142.8, 142.3, 142.1, 141.7, 141.3, 141.0(alkene C), 140.3, 140.0, 139.8, 138.4, 138.2(aryl C), 126.6(aryl C), 126.0(aryl C), 124.3(aryl C), 124.1(aryl C), 122.9(aryl C), 122.5(alkene C), 117.5(aryl C), 112.4(aryl C), 80.6(*sp*<sup>3</sup>-C of C<sub>60</sub>), 77.7, 57.5, 57.0, 56.5, 56.6(*sp*<sup>3</sup>-C of C<sub>60</sub>), 51.9(-CH<sub>3</sub>), 50.6, 43.0, 42.0 41.9, 40.7, 40.3, 38.2, 38.2, 37.1, 32.8, 32.5, 31.6, 28.9, 25.3, 24.8, 23.5(-CH<sub>3</sub>), 23.3(-CH<sub>3</sub>), 21.9, 19.9(-CH<sub>3</sub>), 19.5(-CH<sub>3</sub>), 12.6(-CH<sub>3</sub>); HRMS (MALDI-TOF-MS, DCTB as matrix, negative mode): *m/z* [M]<sup>-</sup> calcd for C<sub>97</sub>H<sub>53</sub>NO<sub>3</sub> 1279.4025; found 1279.4029.



### Expanded $^{13}\text{C}$ NMR (150 MHz, $\text{d}_6\text{-DMSO}/\text{CS}_2$ ) of compound 2a

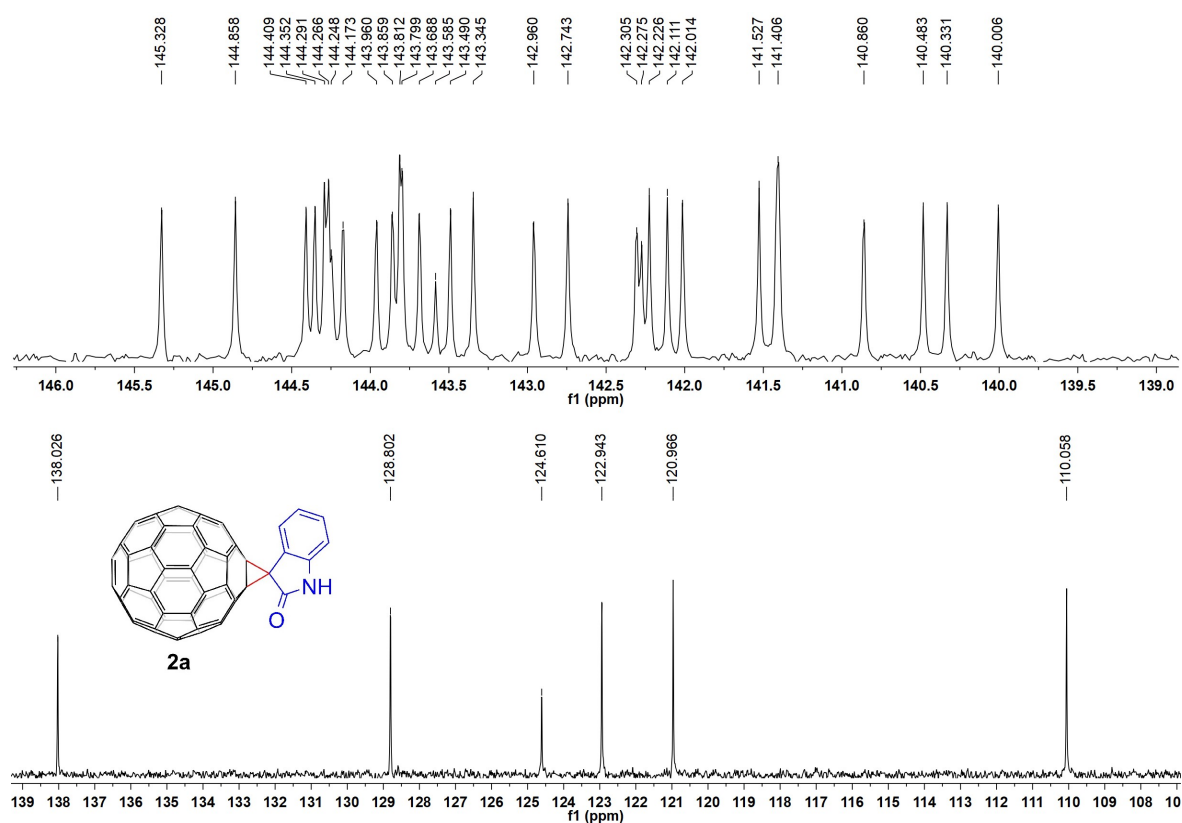

### $^1\text{H}$ NMR (600 MHz, $\text{d}_6\text{-DMSO}/\text{CS}_2$ ) of compound 2b

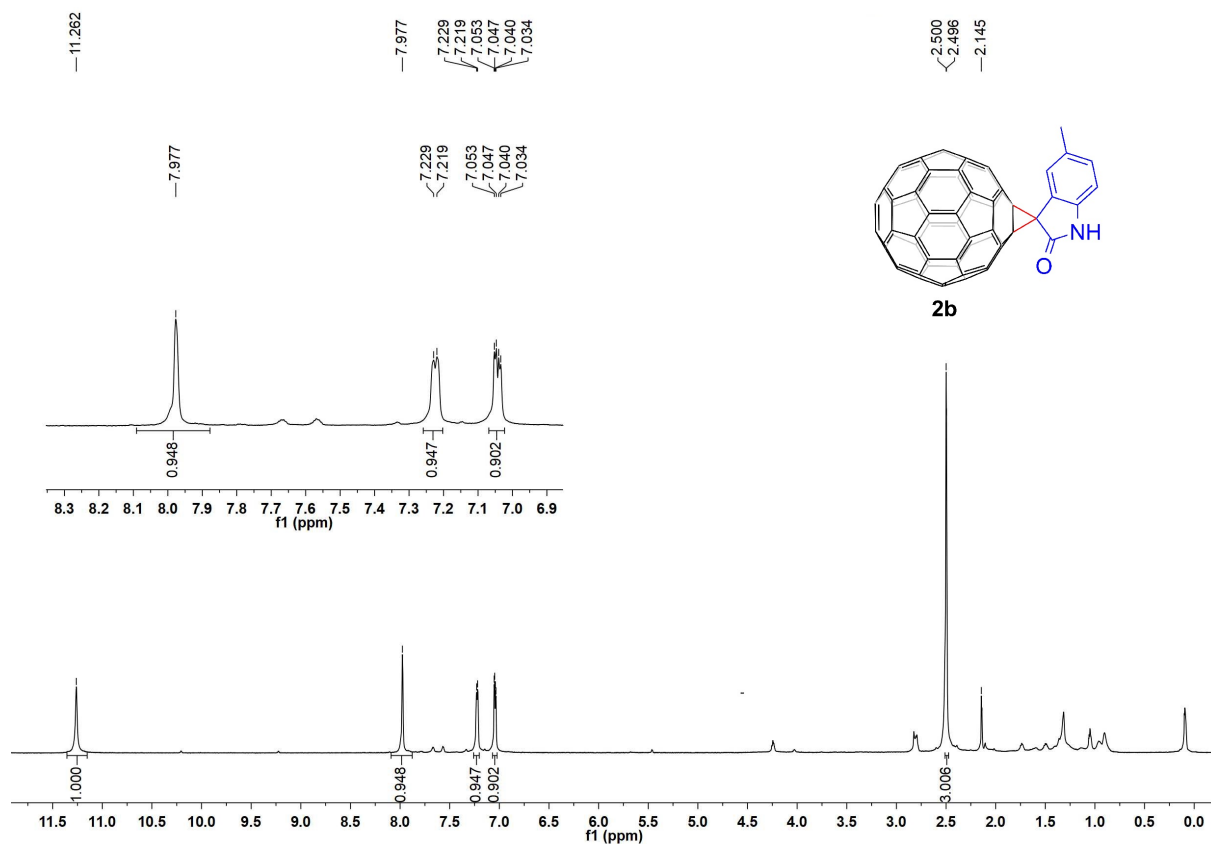



**$^{13}\text{C}$  NMR (150 MHz,  $\text{d}_6\text{-DMSO}/\text{CS}_2$ ) of compound 2b**

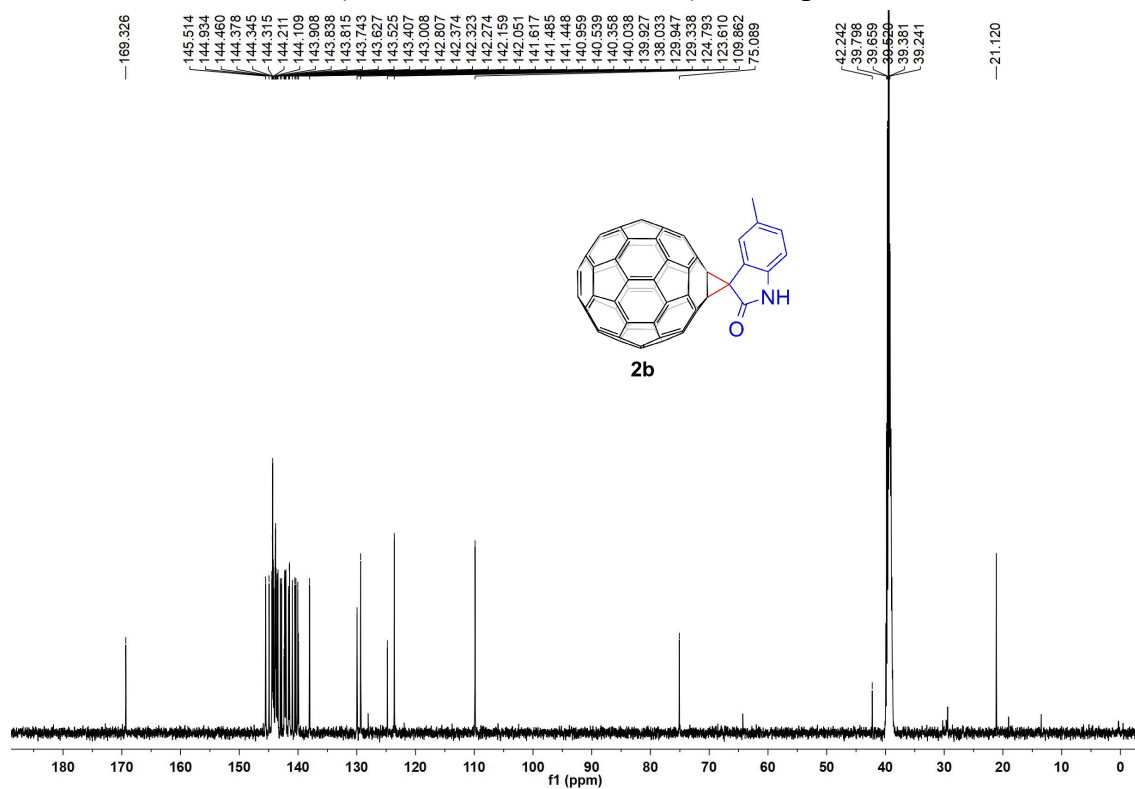

**Expanded  $^{13}\text{C}$  NMR (150 MHz,  $\text{d}_6\text{-DMSO}/\text{CS}_2$ ) of compound 2b**

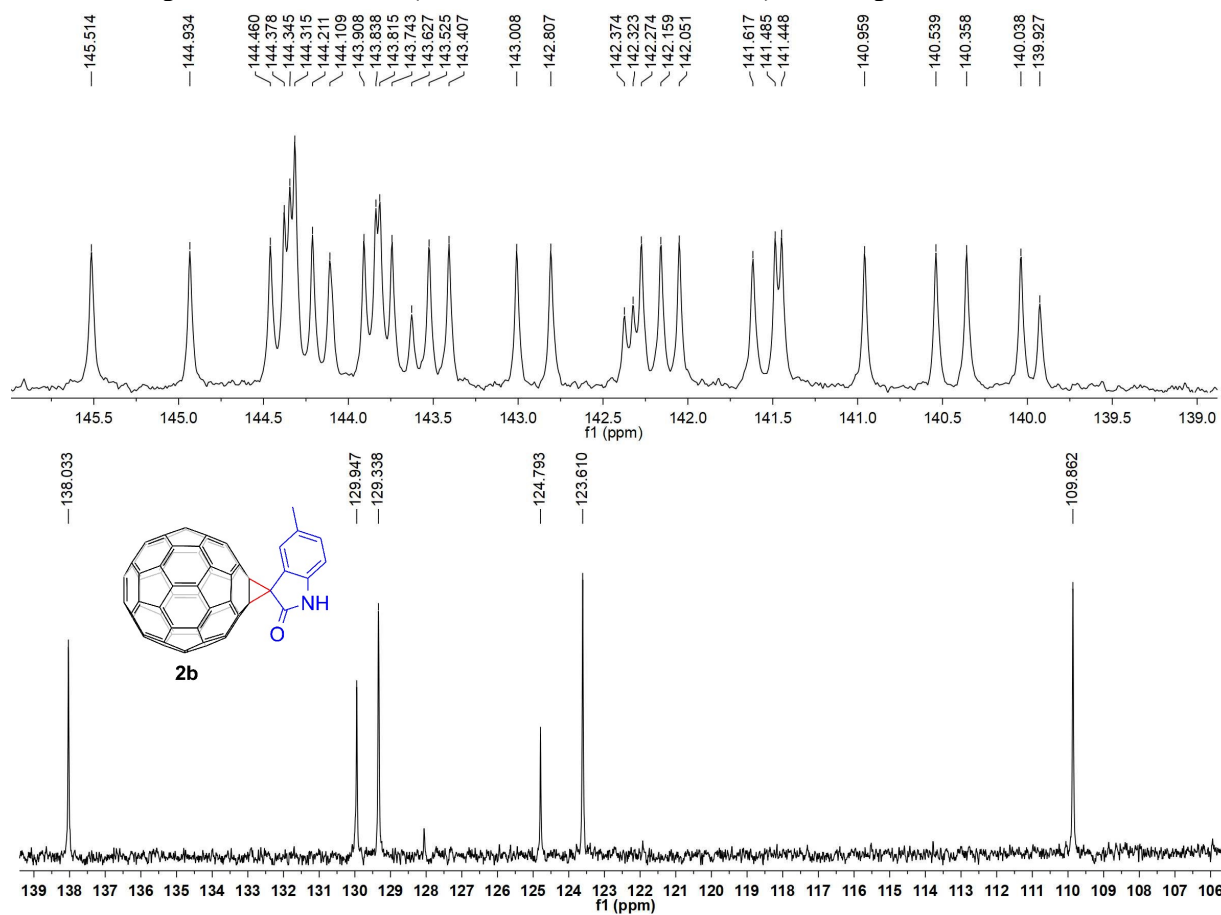



**<sup>1</sup>H NMR (400 MHz, d<sub>6</sub>-DMSO/CS<sub>2</sub>) of compound 2c**

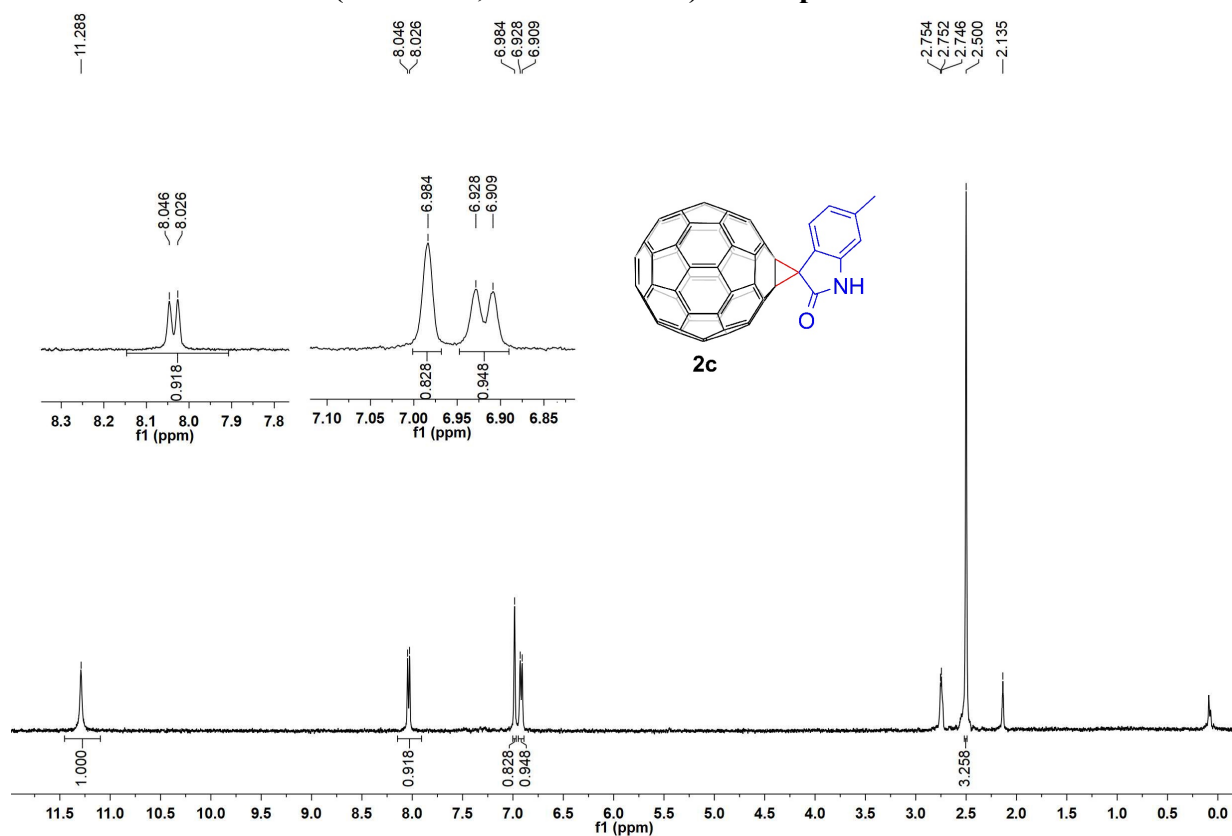

**<sup>13</sup>C NMR (100 MHz, d<sub>6</sub>-DMSO/CS<sub>2</sub>) of compound 2c**

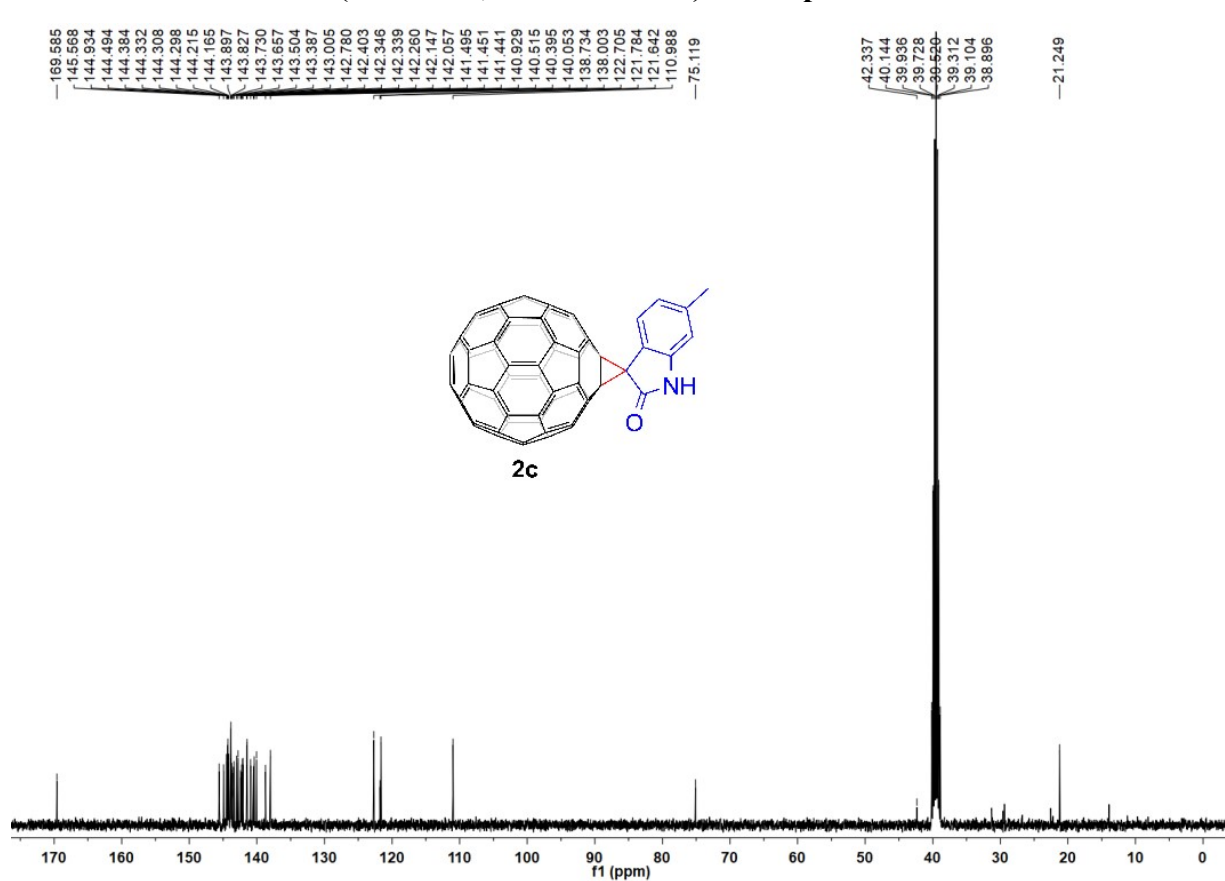

### Expanded $^{13}\text{C}$ NMR (100 MHz, $\text{d}_6\text{-DMSO}/\text{CS}_2$ ) of compound **2c**

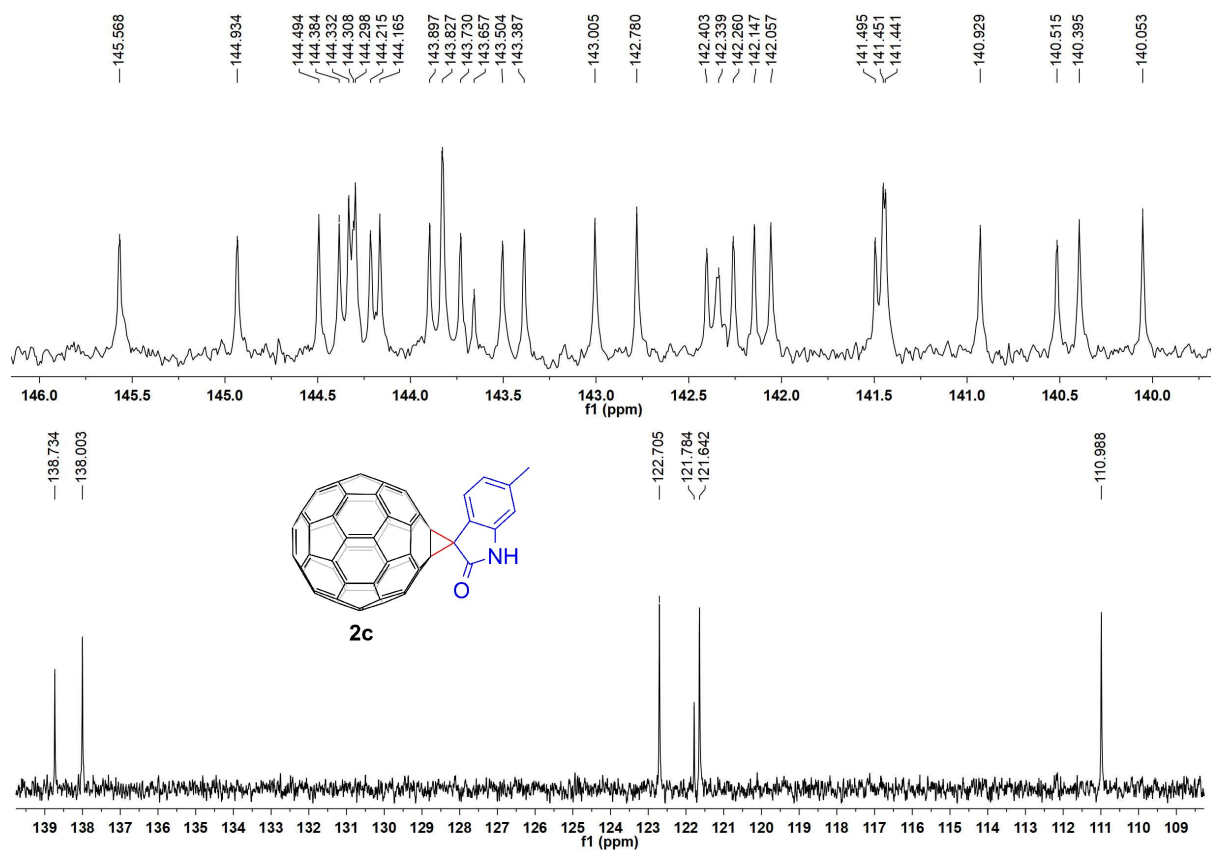

### $^1\text{H}$ NMR (600 MHz, $\text{d}_6\text{-DMSO}/\text{CS}_2$ ) of compound **2d**

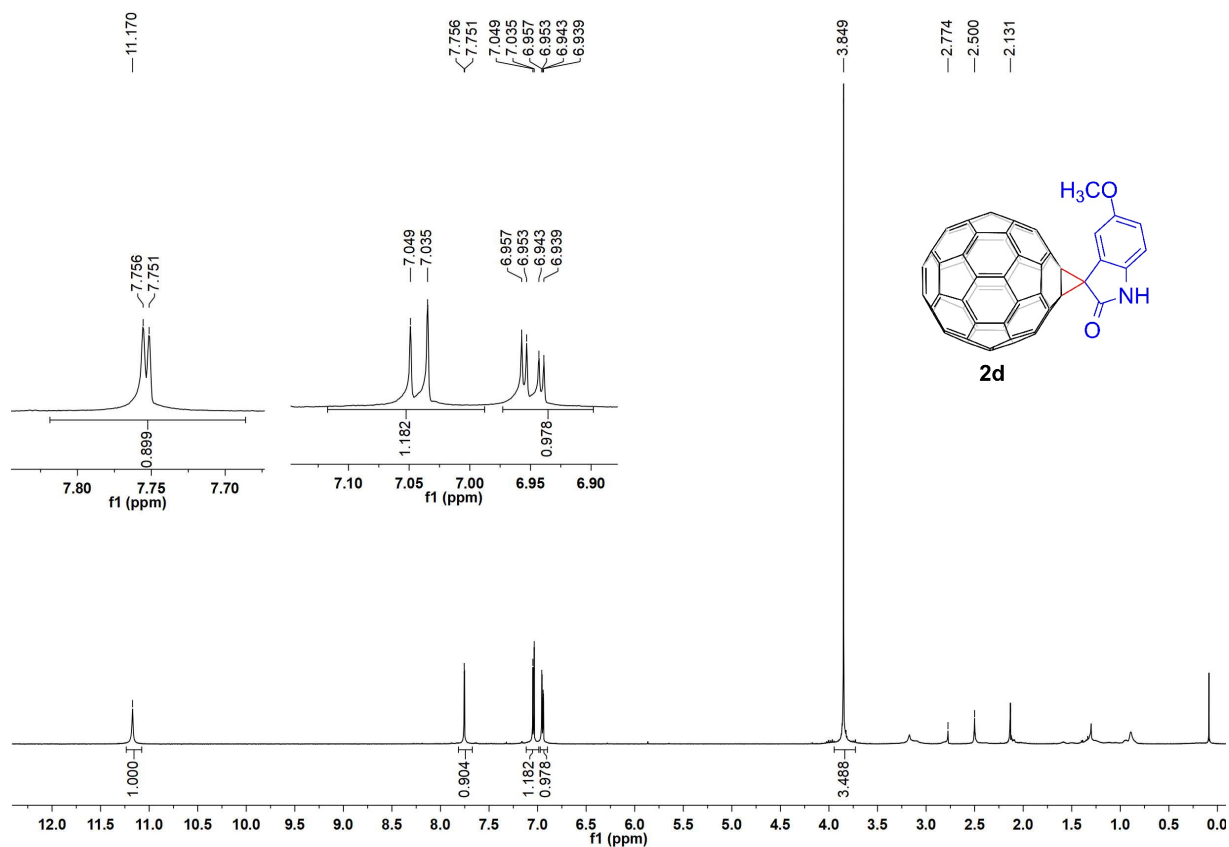

**$^{13}\text{C}$  NMR (150 MHz,  $\text{d}_6\text{-DMSO}/\text{CS}_2$ ) of compound 2d**

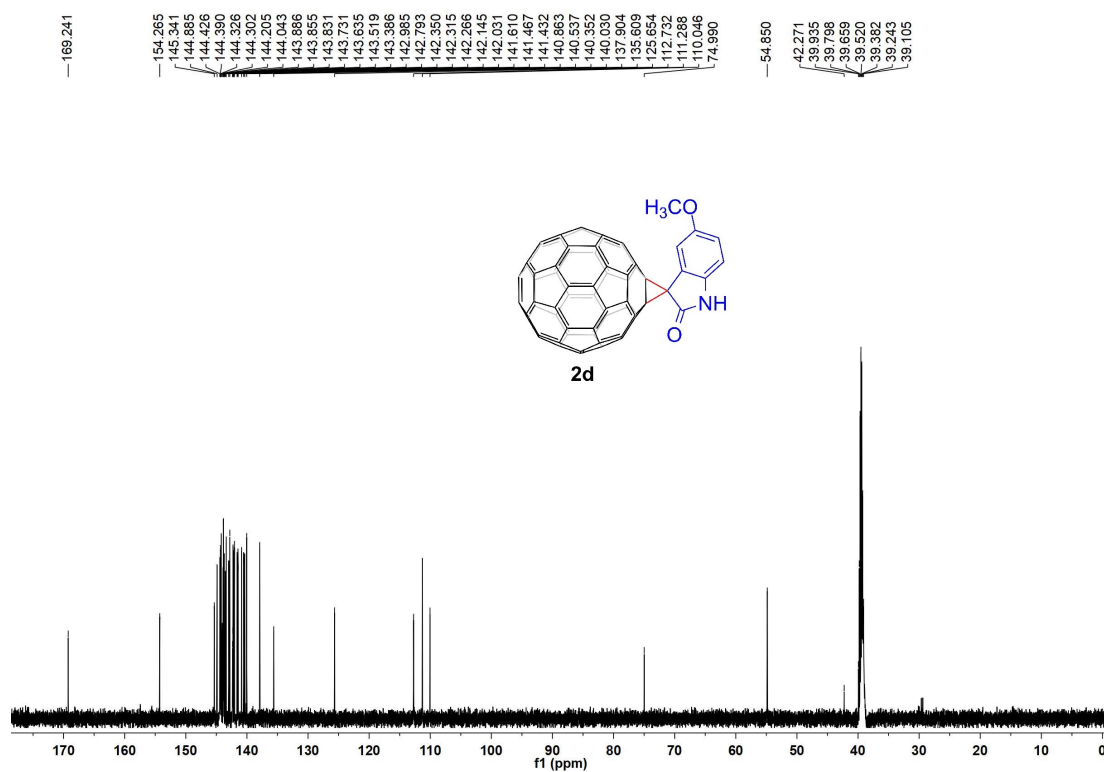

**Expanded  $^{13}\text{C}$  NMR (150 MHz,  $\text{d}_6\text{-DMSO}/\text{CS}_2$ ) of compound 2d**

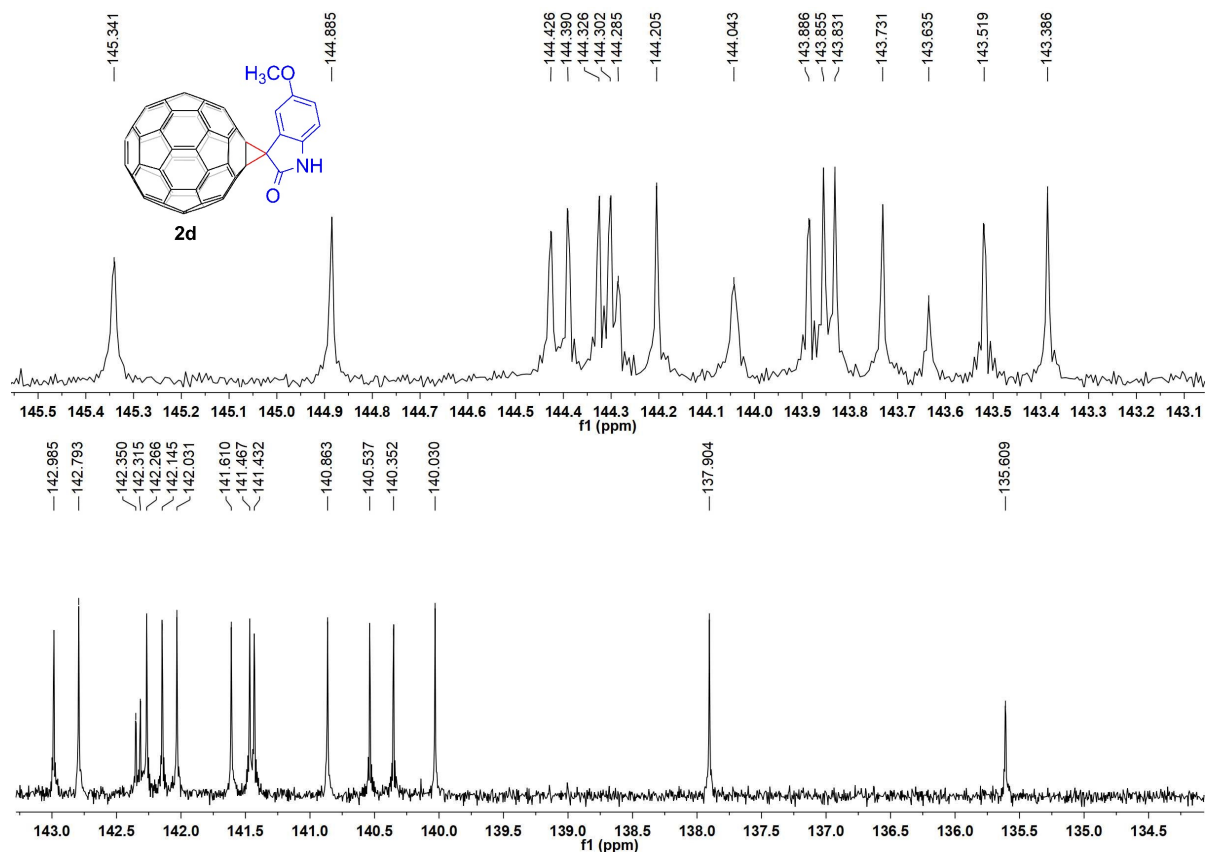

**<sup>1</sup>H NMR (400 MHz, d<sub>6</sub>-DMSO/CS<sub>2</sub>) of compound 2e**

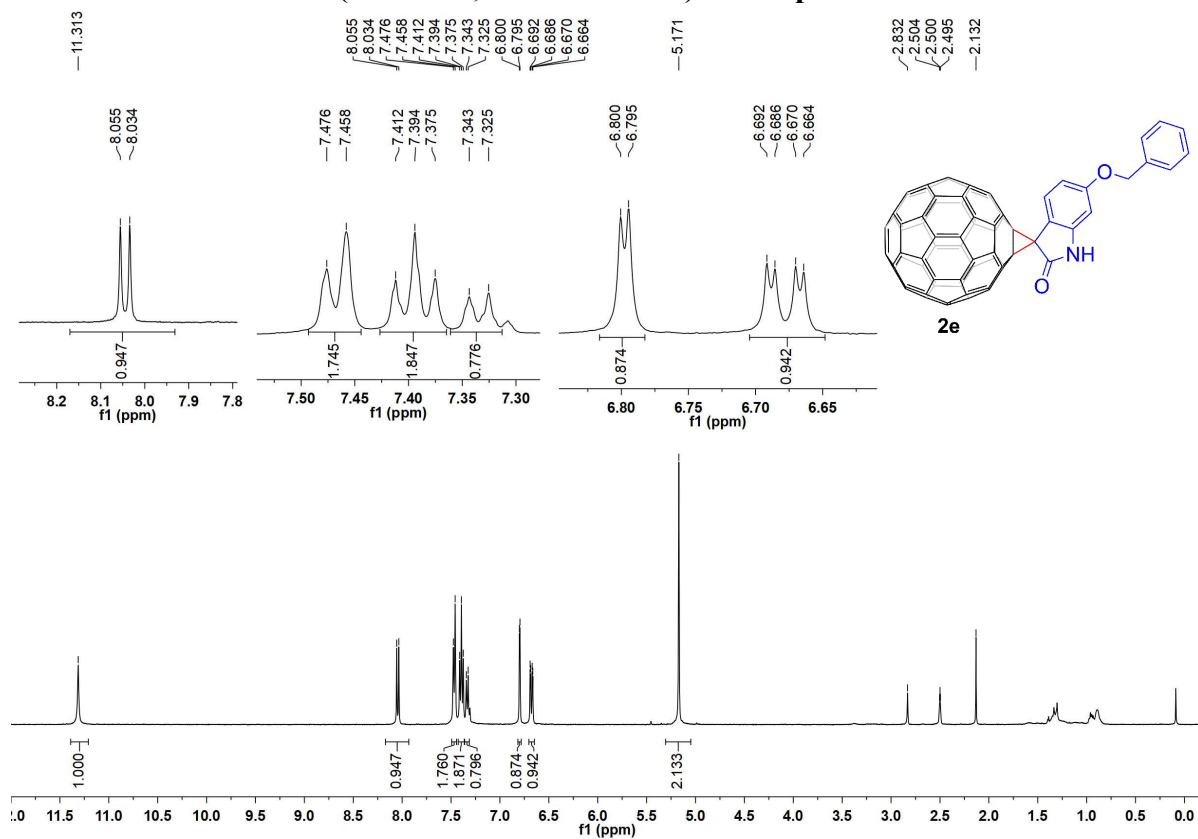

**<sup>13</sup>C NMR (100 MHz, d<sub>6</sub>-DMSO/CS<sub>2</sub>) of compound 2e**

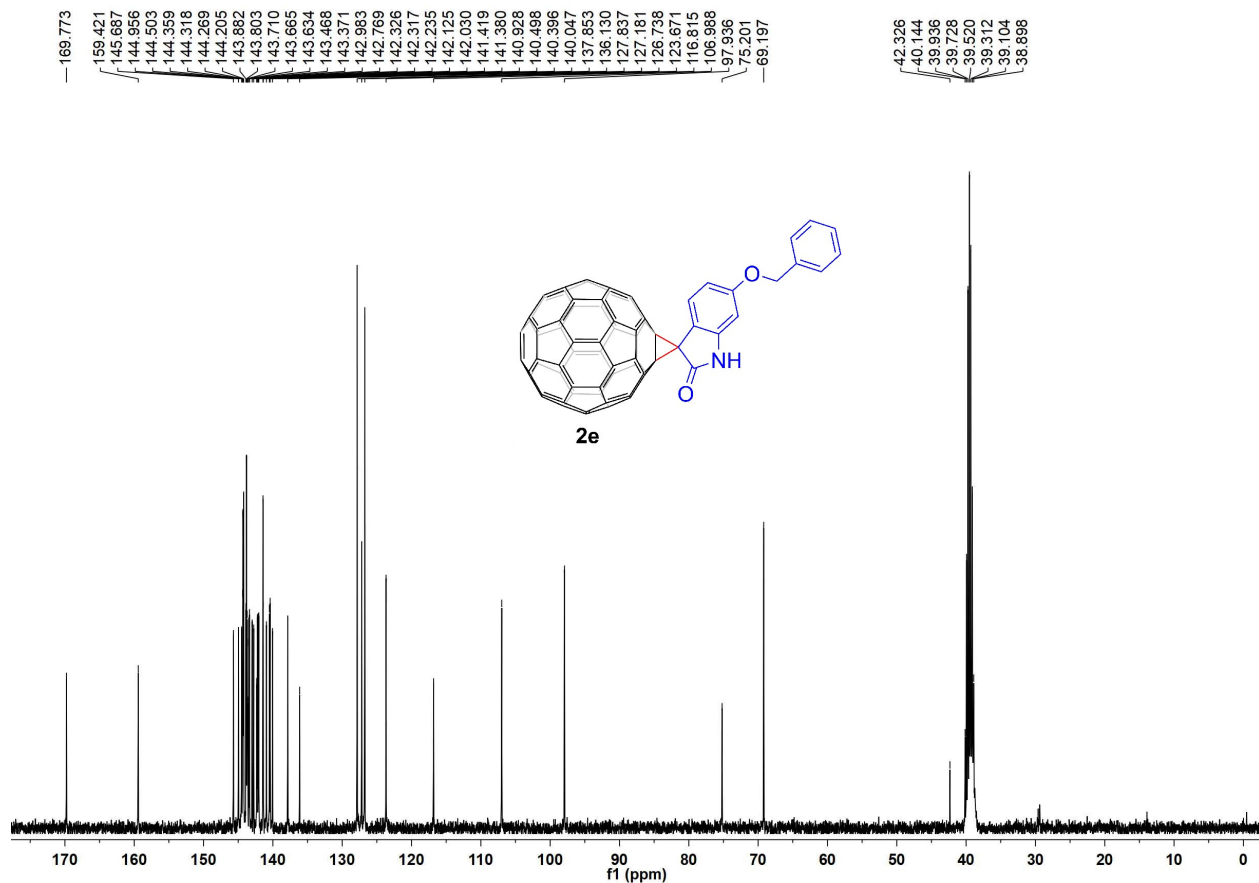

**Expanded  $^{13}\text{C}$  NMR (100 MHz,  $\text{d}_6\text{-DMSO}/\text{CS}_2$ ) of compound 2e**

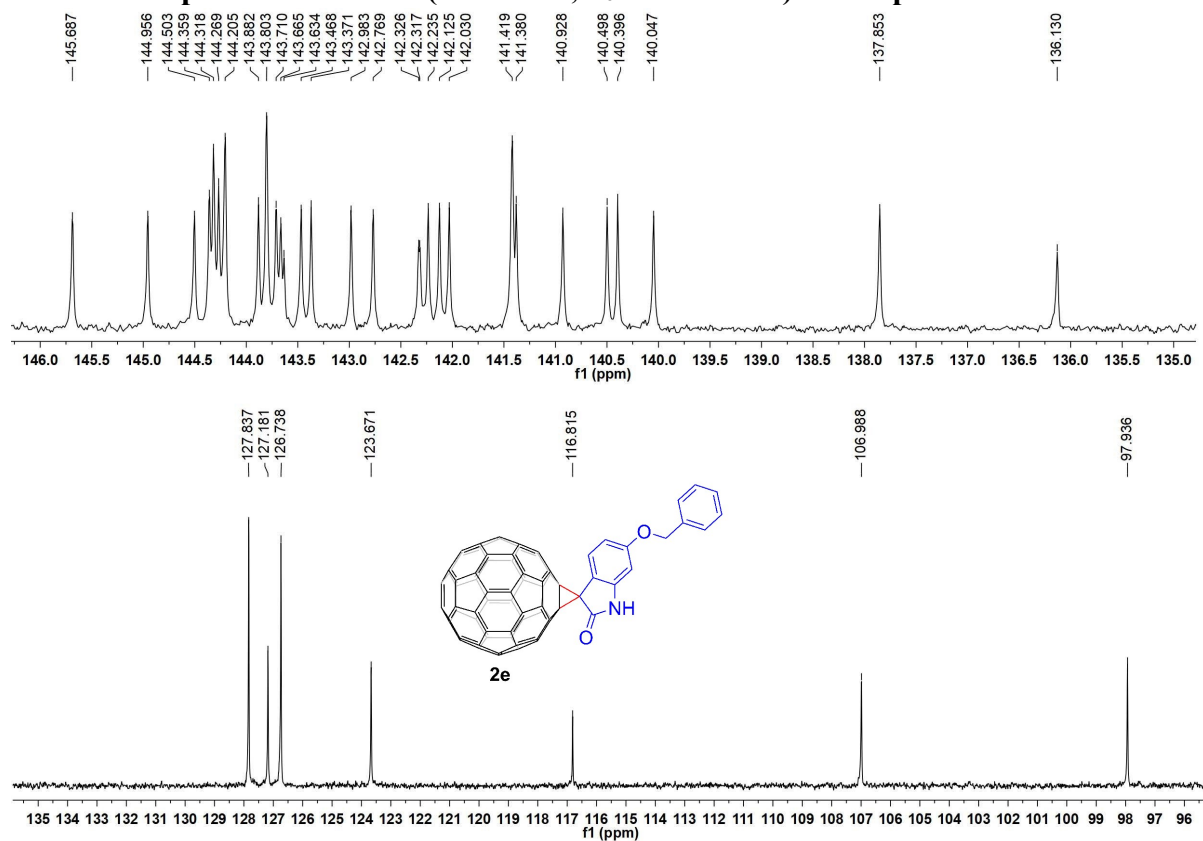

**$^1\text{H}$  NMR (400 MHz,  $\text{d}_6\text{-DMSO}/\text{CS}_2$ ) of compound 3f**

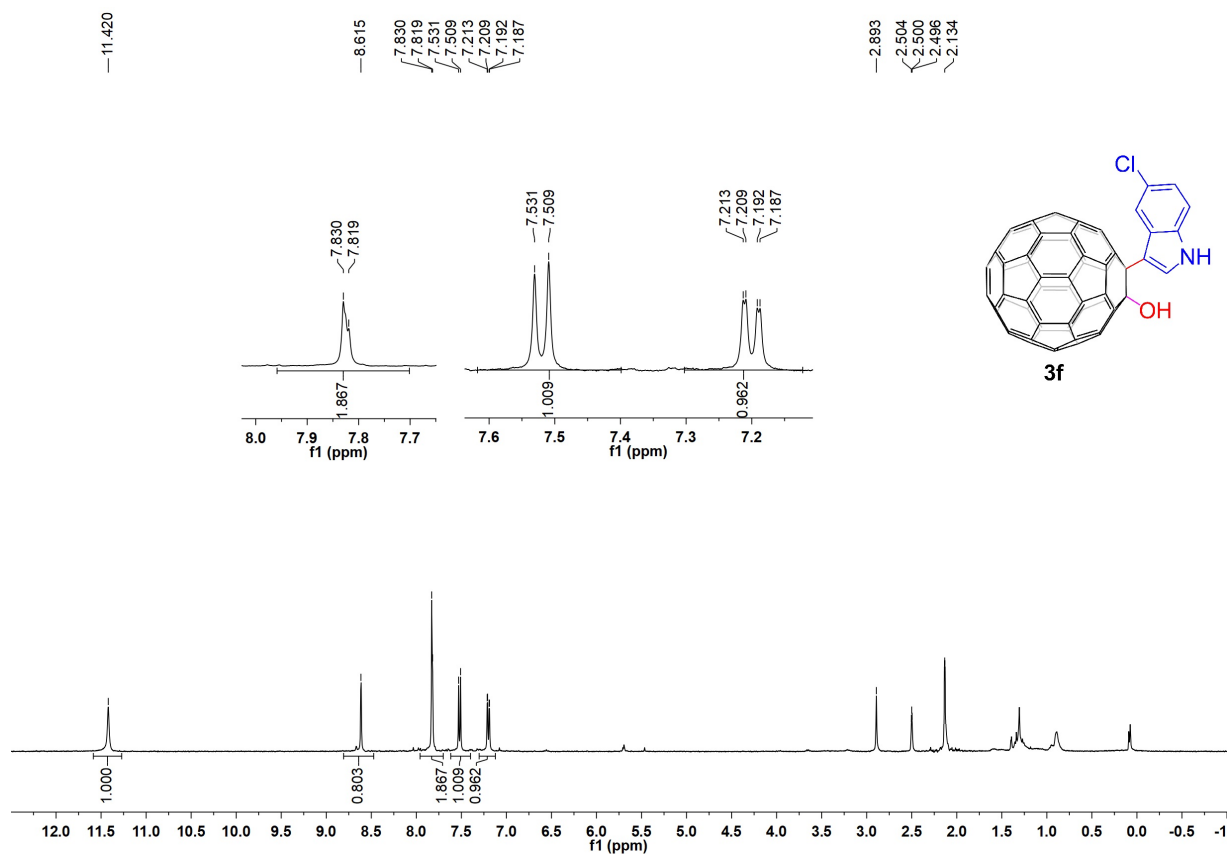

**$^{13}\text{C}$  NMR (100 MHz,  $\text{d}_6\text{-DMSO}/\text{CS}_2$ ) of compound 3f**

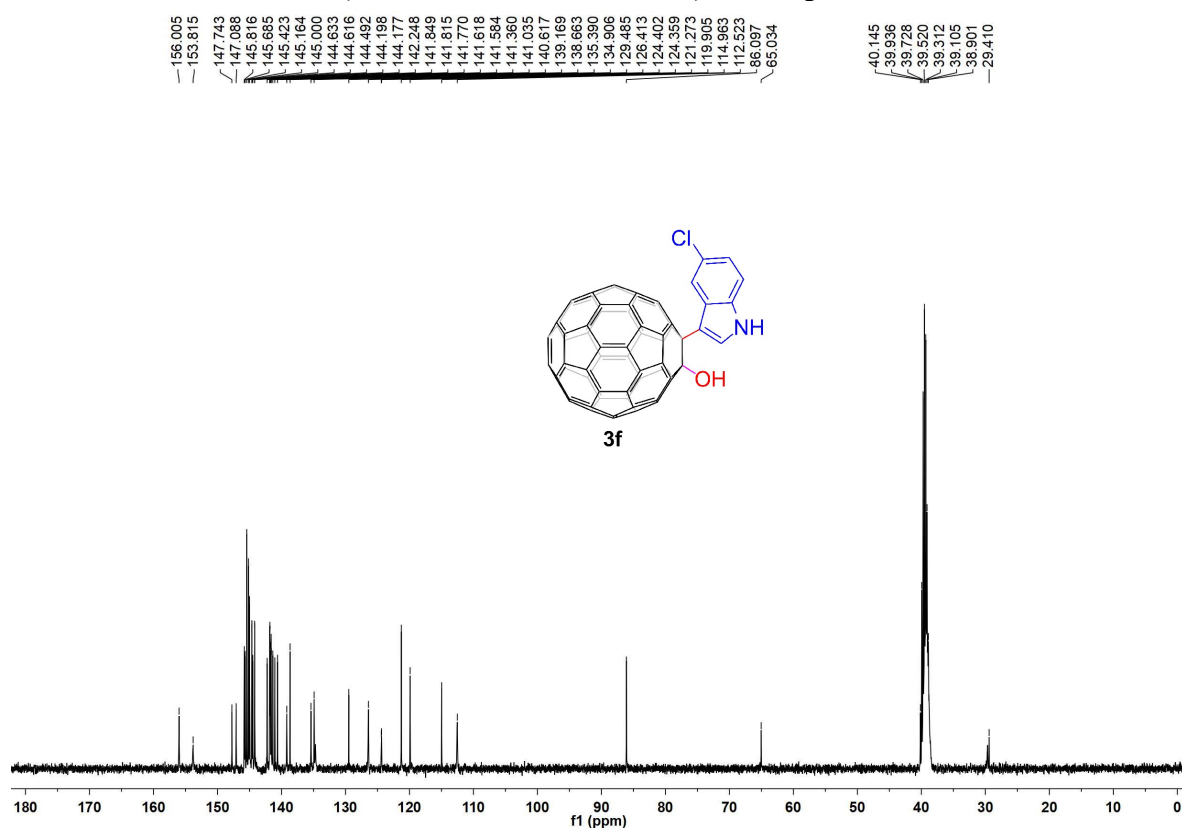

**Expanded  $^{13}\text{C}$  NMR (100 MHz,  $\text{d}_6\text{-DMSO}/\text{CS}_2$ ) of compound 3f**

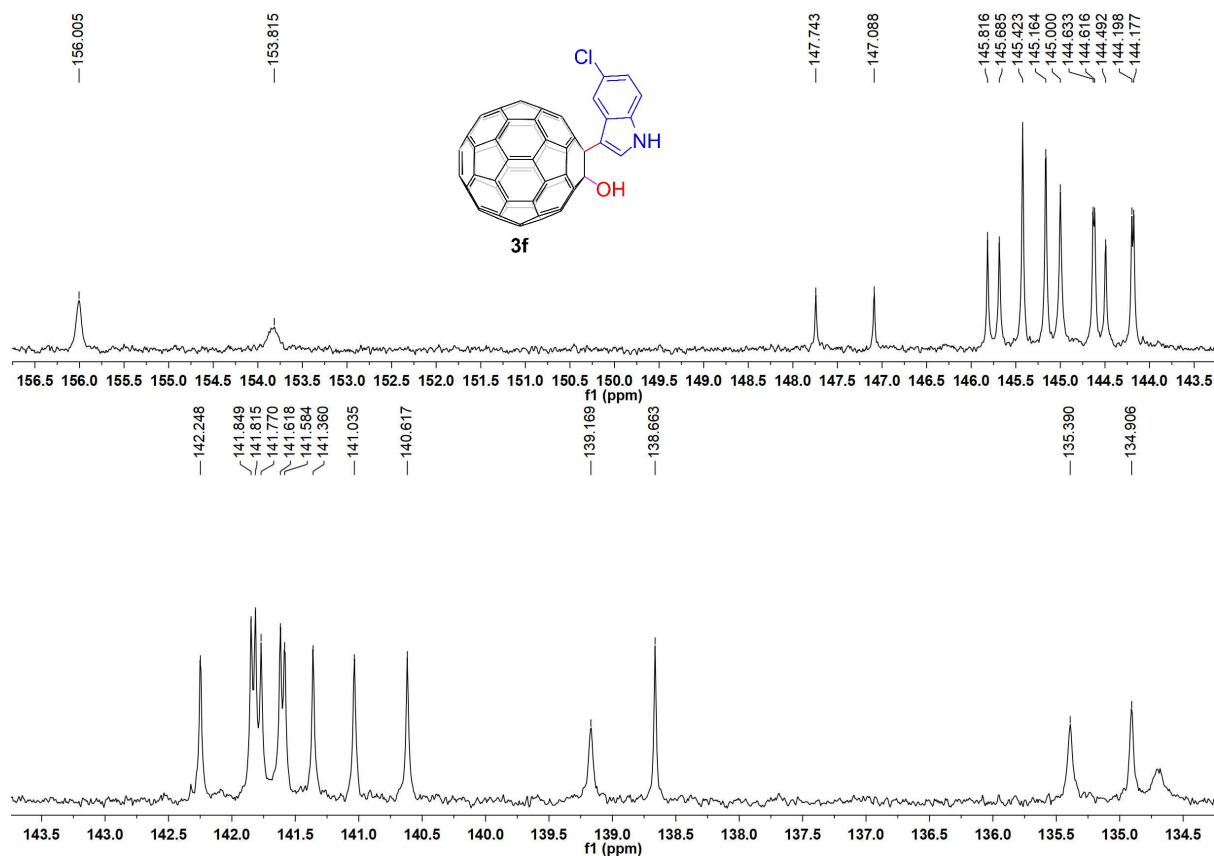

**<sup>1</sup>H NMR (400 MHz, d<sub>6</sub>-DMSO/CS<sub>2</sub>) of compound 3g**

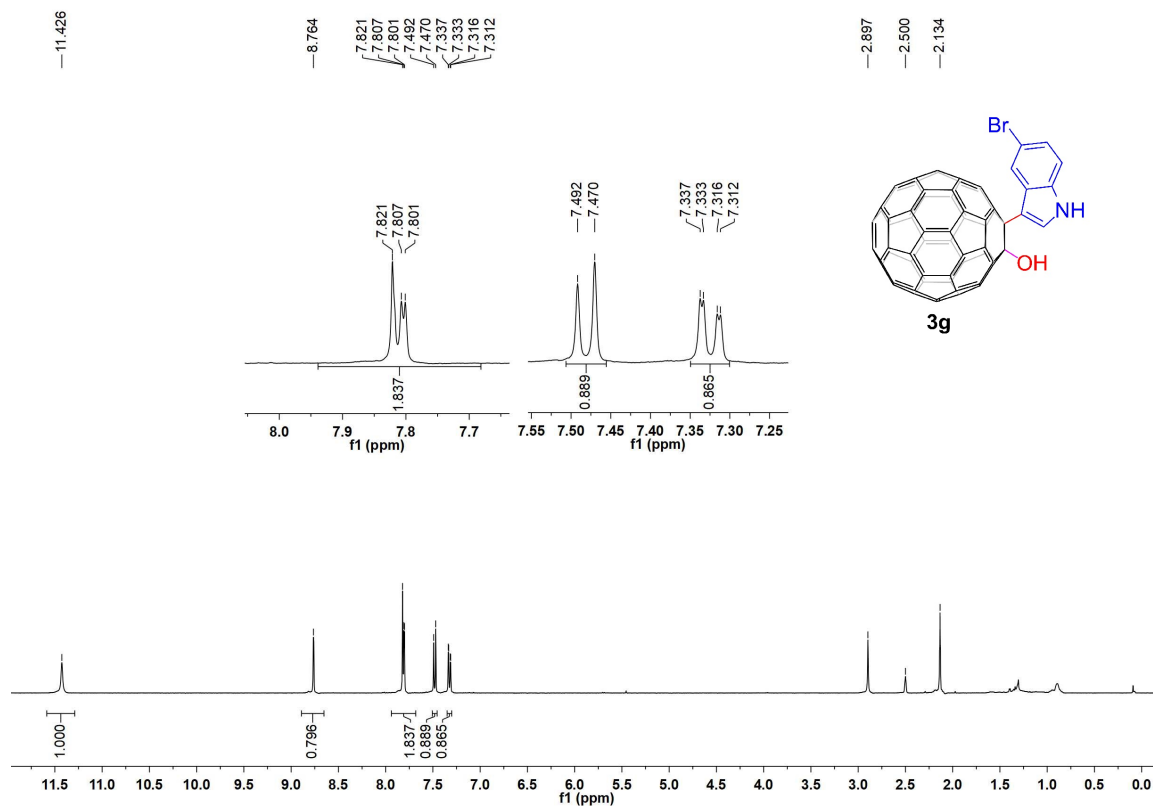

**<sup>13</sup>C NMR (100 MHz, d<sub>6</sub>-DMSO/CS<sub>2</sub>) of compound 3g**

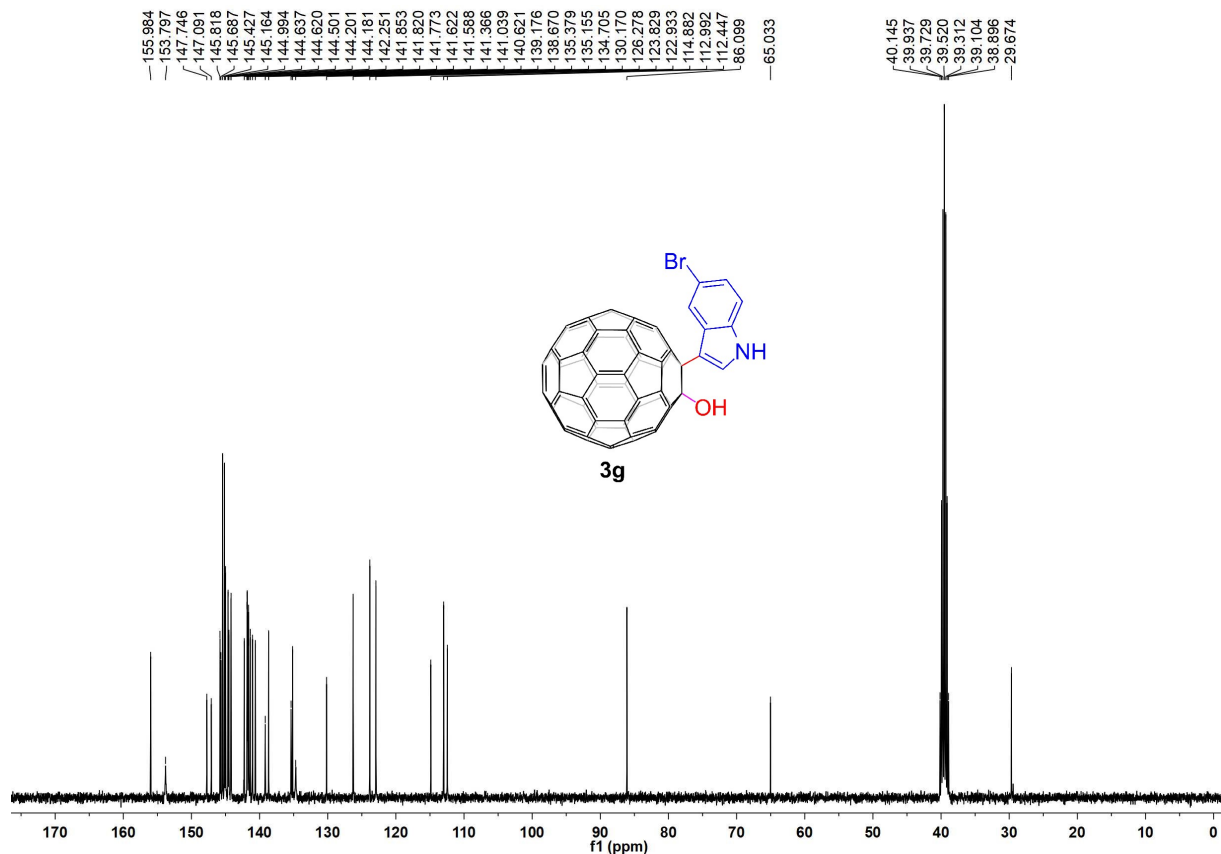



**Expanded <sup>13</sup>C NMR (100 MHz , d<sub>6</sub>-DMSO/CS<sub>2</sub>) of compound 3g**

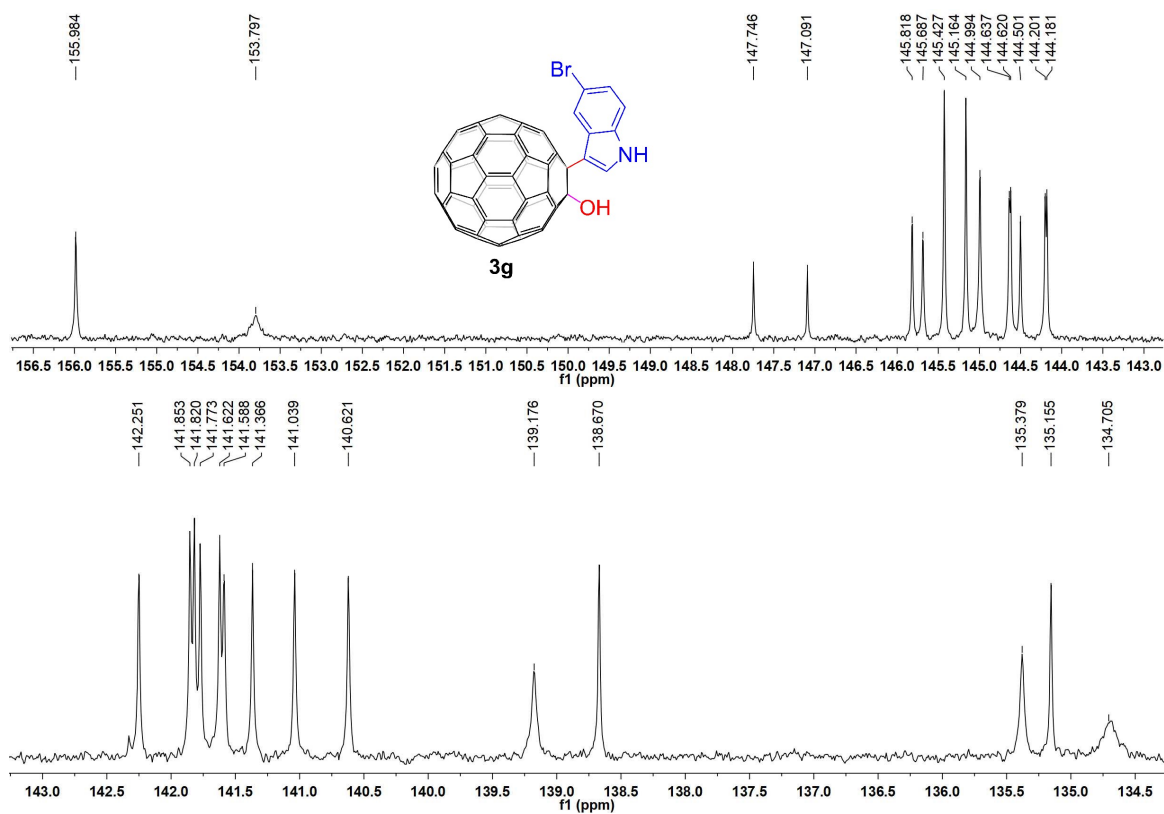

**<sup>1</sup>H NMR (400 MHz , d<sub>6</sub>-DMSO/CS<sub>2</sub>) of compound 3h**

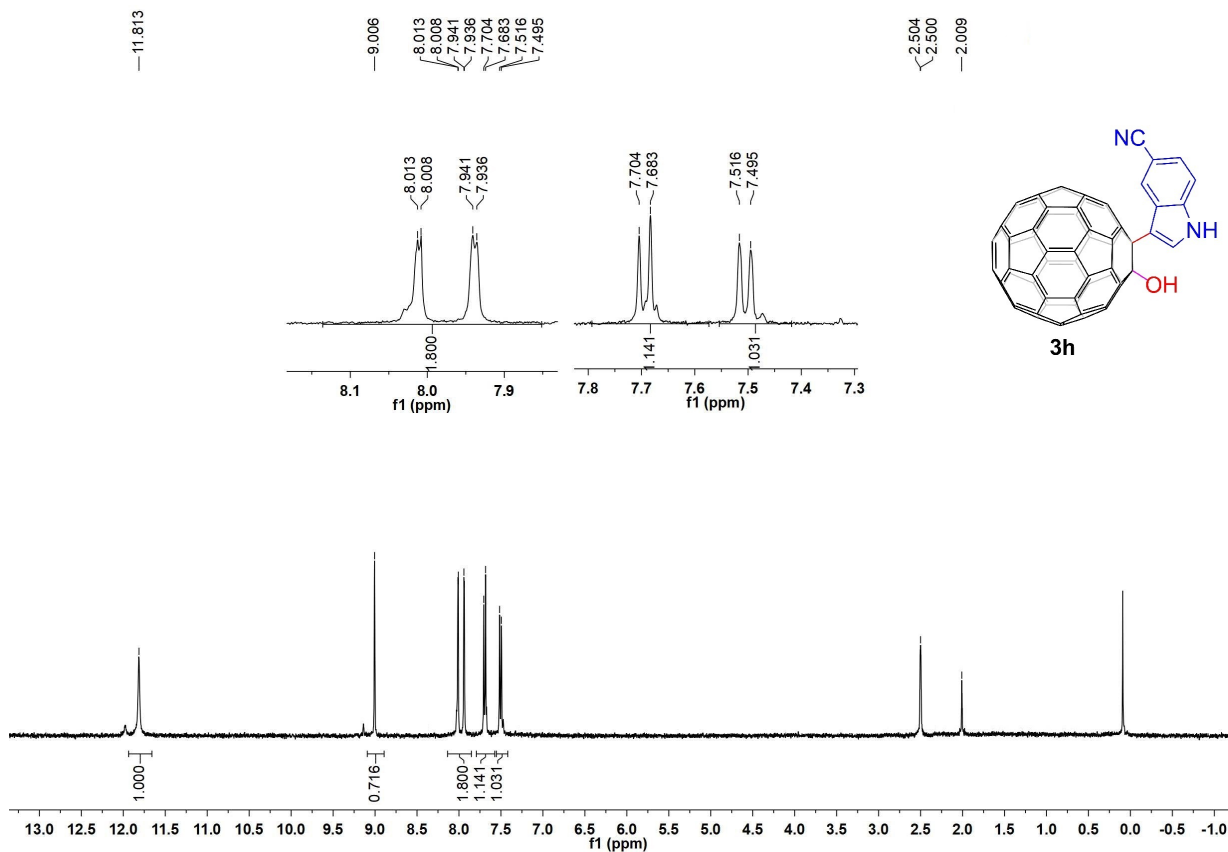

**$^{13}\text{C}$  NMR (100 MHz,  $\text{d}_6\text{-DMSO}/\text{CS}_2$ ) of compound 3h**

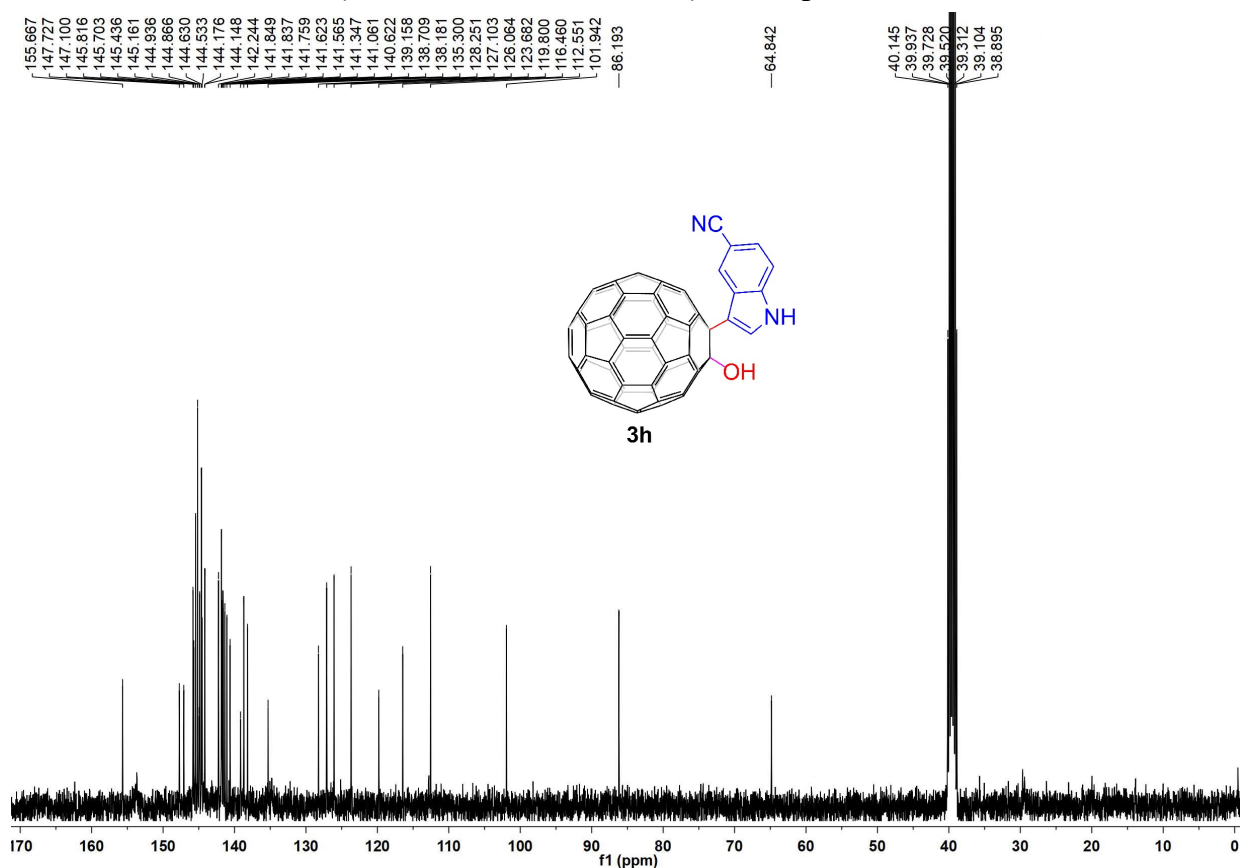

**Expanded  $^{13}\text{C}$  NMR (100 MHz,  $\text{d}_6\text{-DMSO}/\text{CS}_2$ ) of compound 3h**

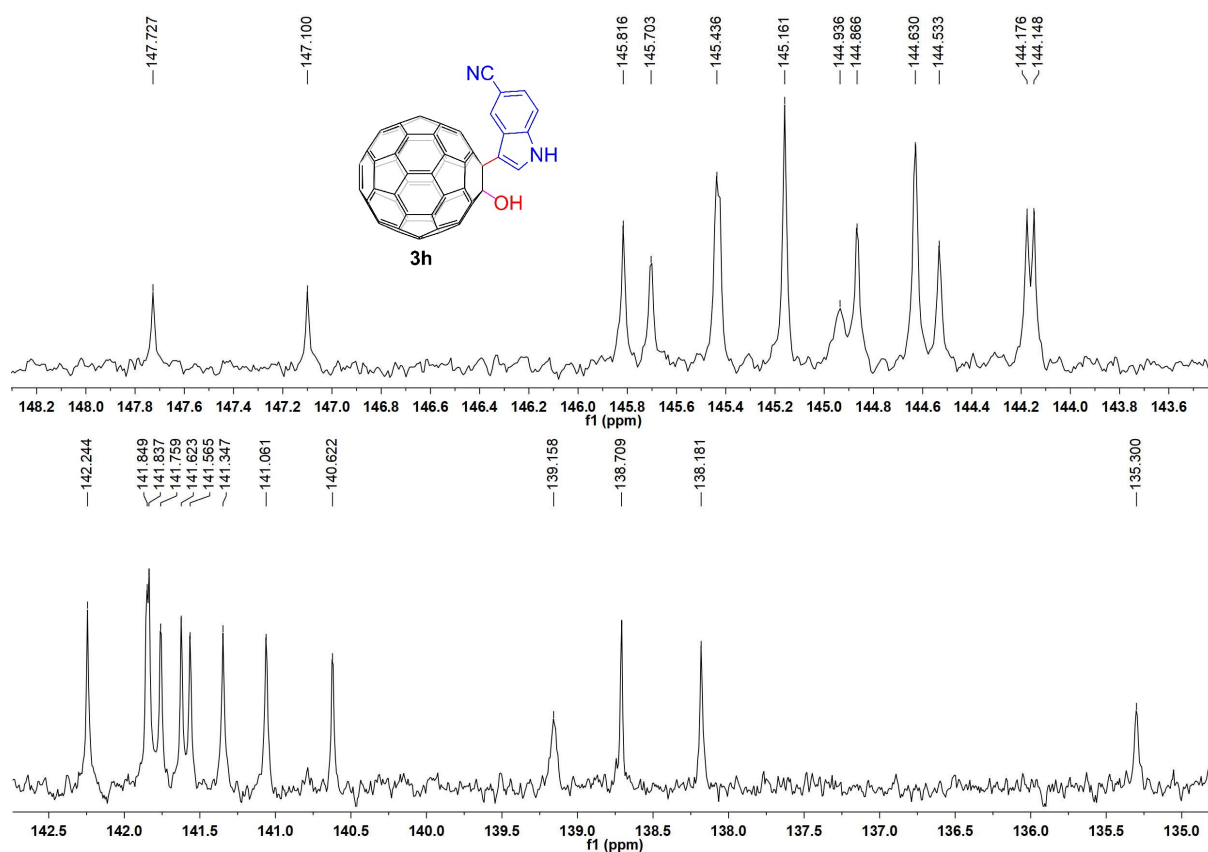

**$^1\text{H}$  NMR (400 MHz,  $\text{d}_6\text{-DMSO}/\text{CS}_2$ ) of compound 3i**

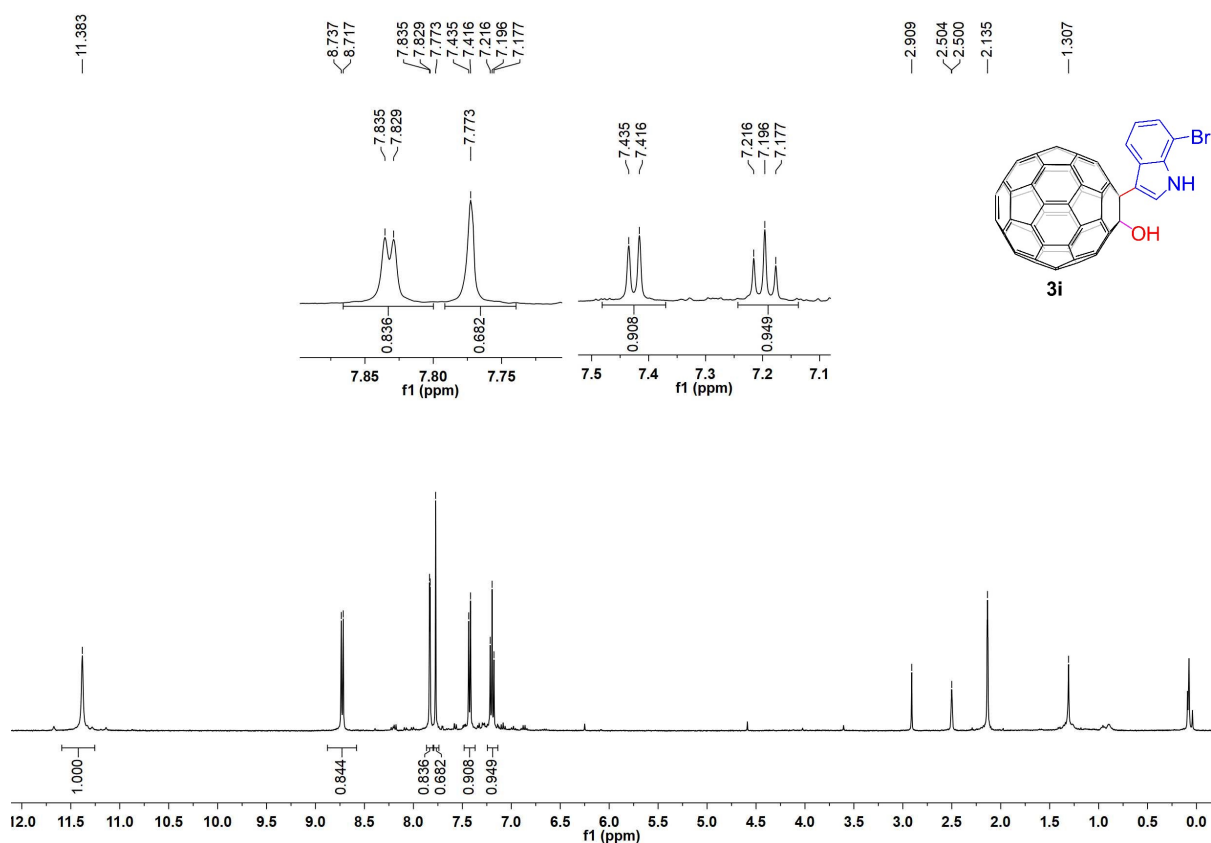

**$^{13}\text{C}$  NMR (100 MHz,  $\text{d}_6\text{-DMSO}/\text{CS}_2$ ) of compound 3i**

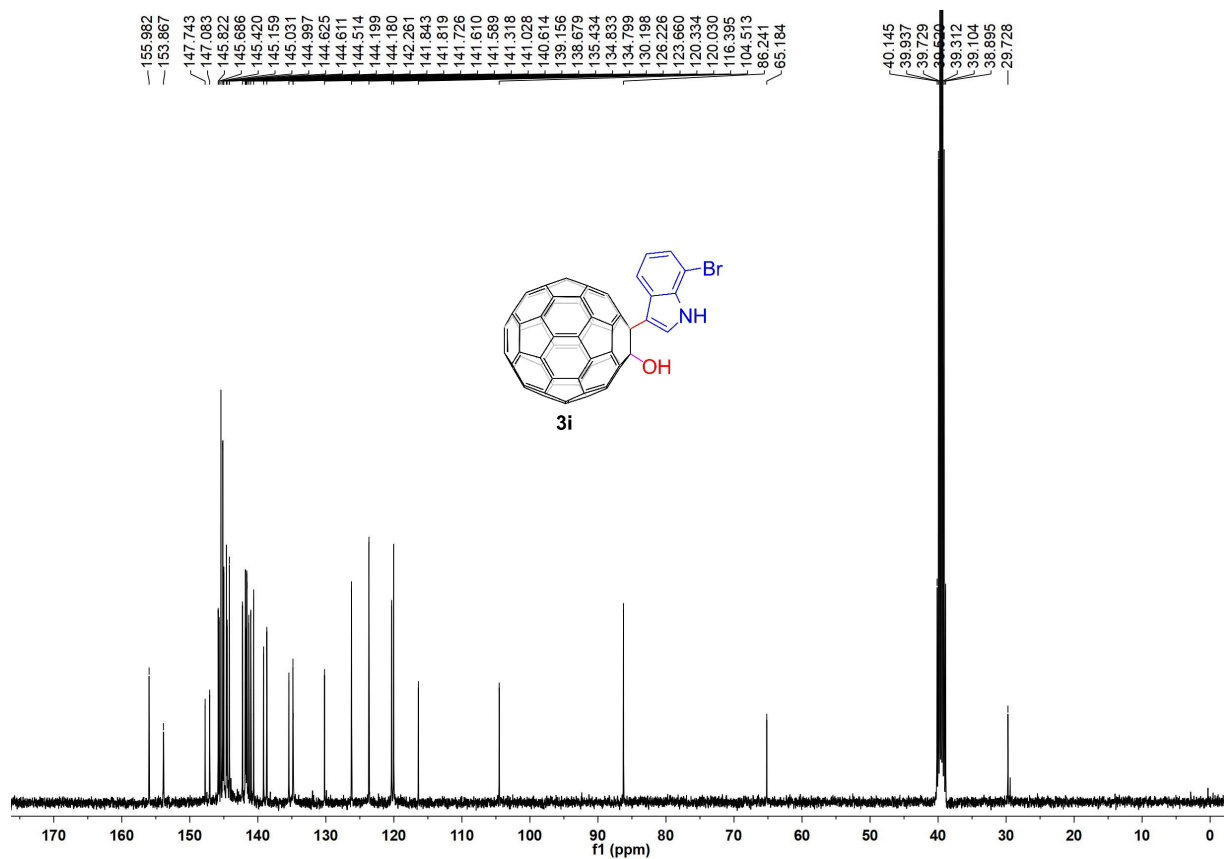

Expanded  $^{13}\text{C}$  NMR (100 MHz,  $\text{d}_6\text{-DMSO}/\text{CS}_2$ ) of compound **3i**

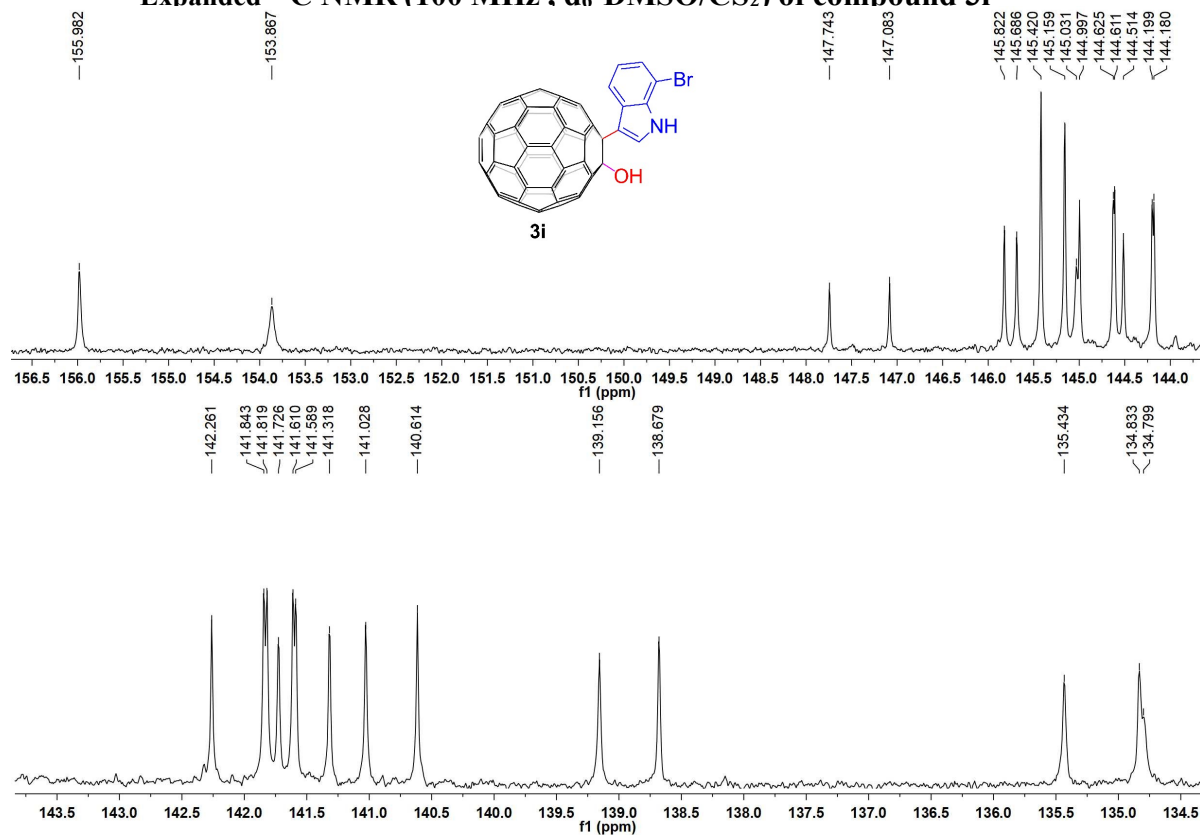

$^1\text{H}$  NMR (400 MHz,  $\text{d}_6\text{-DMSO}/\text{CS}_2$ ) of compound **5ga**

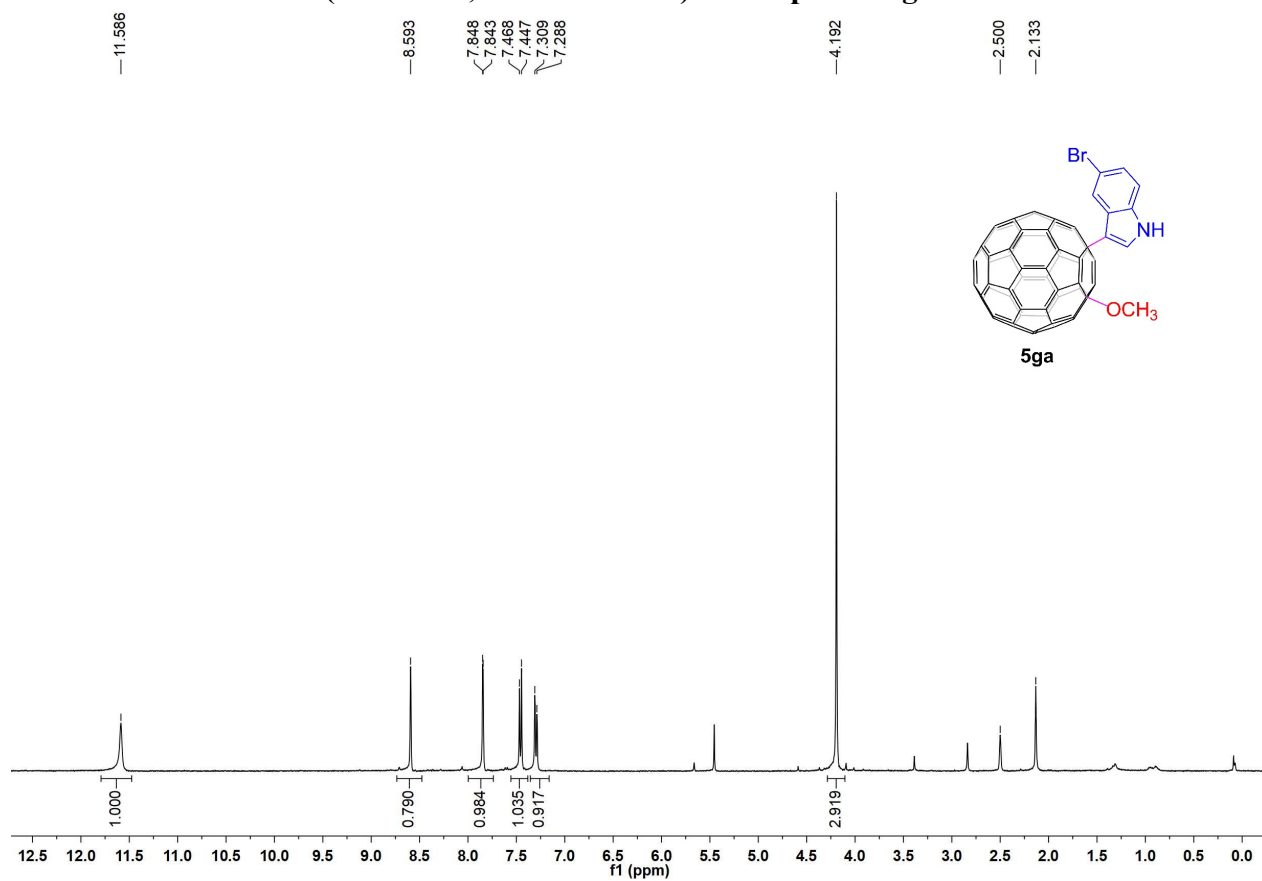

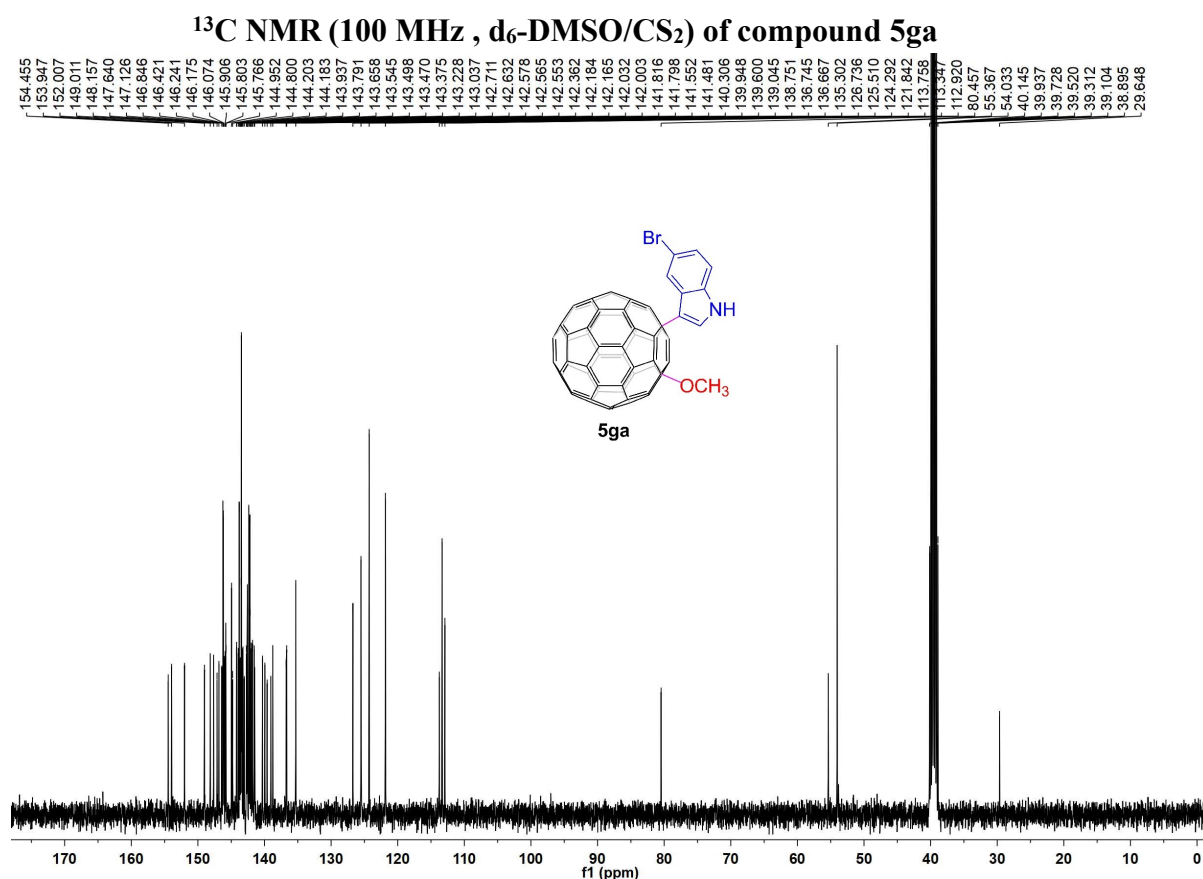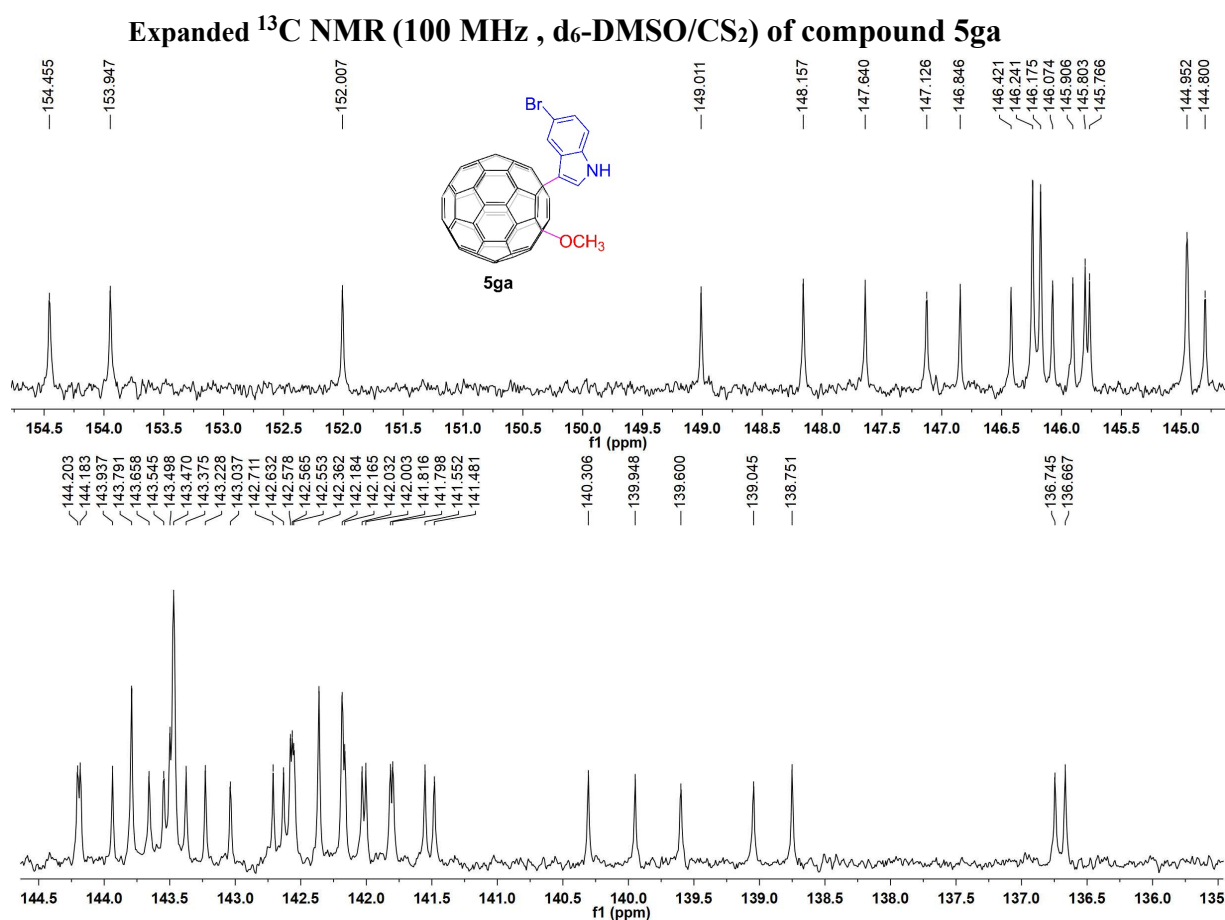

**<sup>1</sup>H NMR (400 MHz, d<sub>6</sub>-DMSO/CS<sub>2</sub>) of compound 5ha**

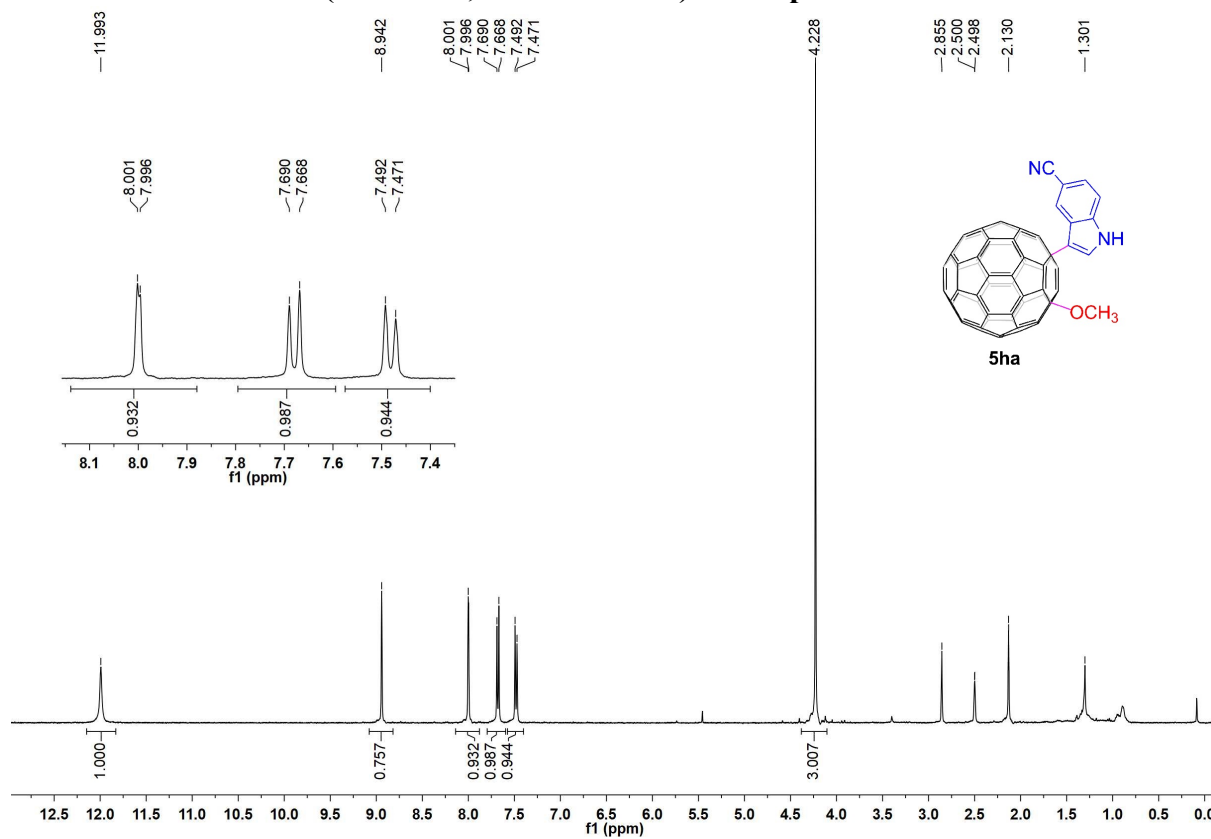

**<sup>13</sup>C NMR (100 MHz, d<sub>6</sub>-DMSO/CS<sub>2</sub>) of compound 5ha**

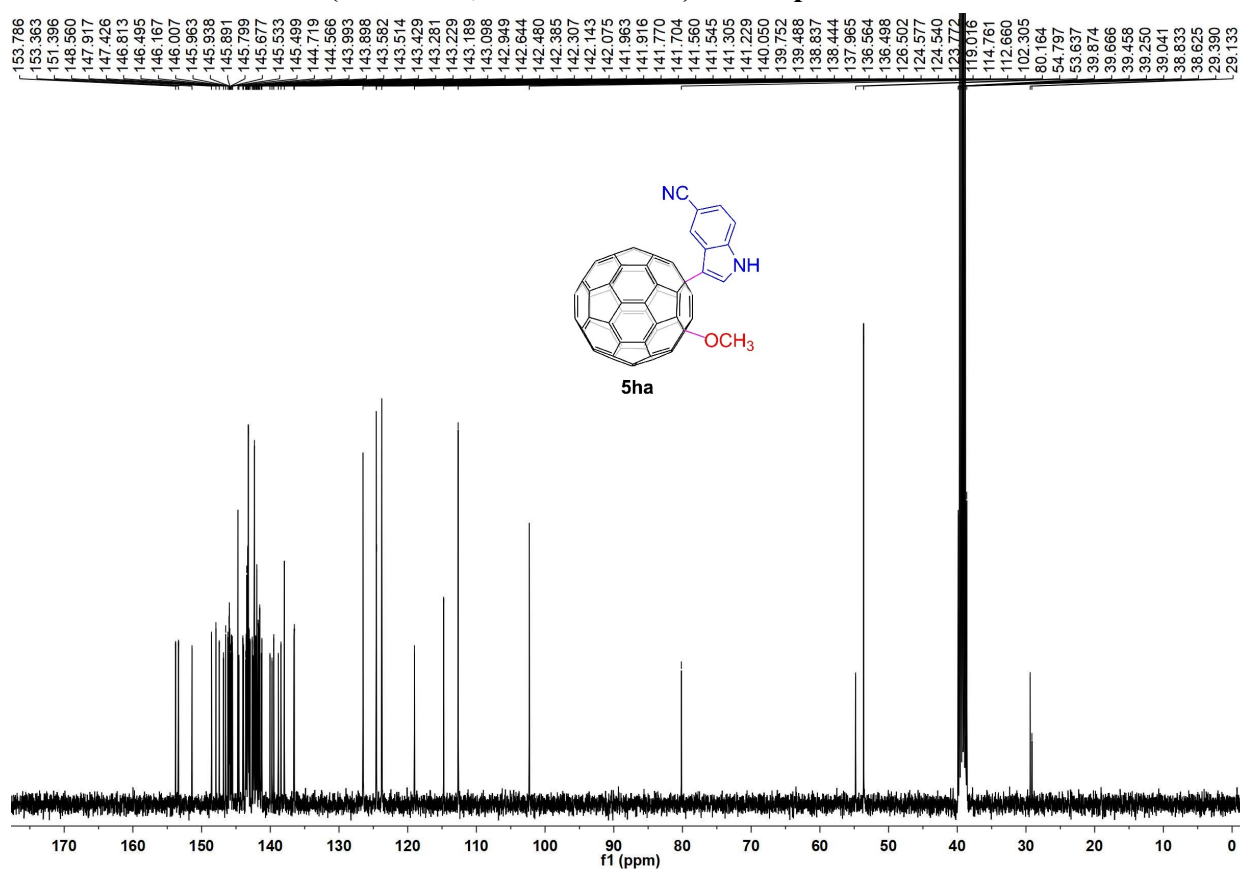

Expanded  $^{13}\text{C}$  NMR (100 MHz,  $d_6$ -DMSO/ $\text{CS}_2$ ) of compound 5ha

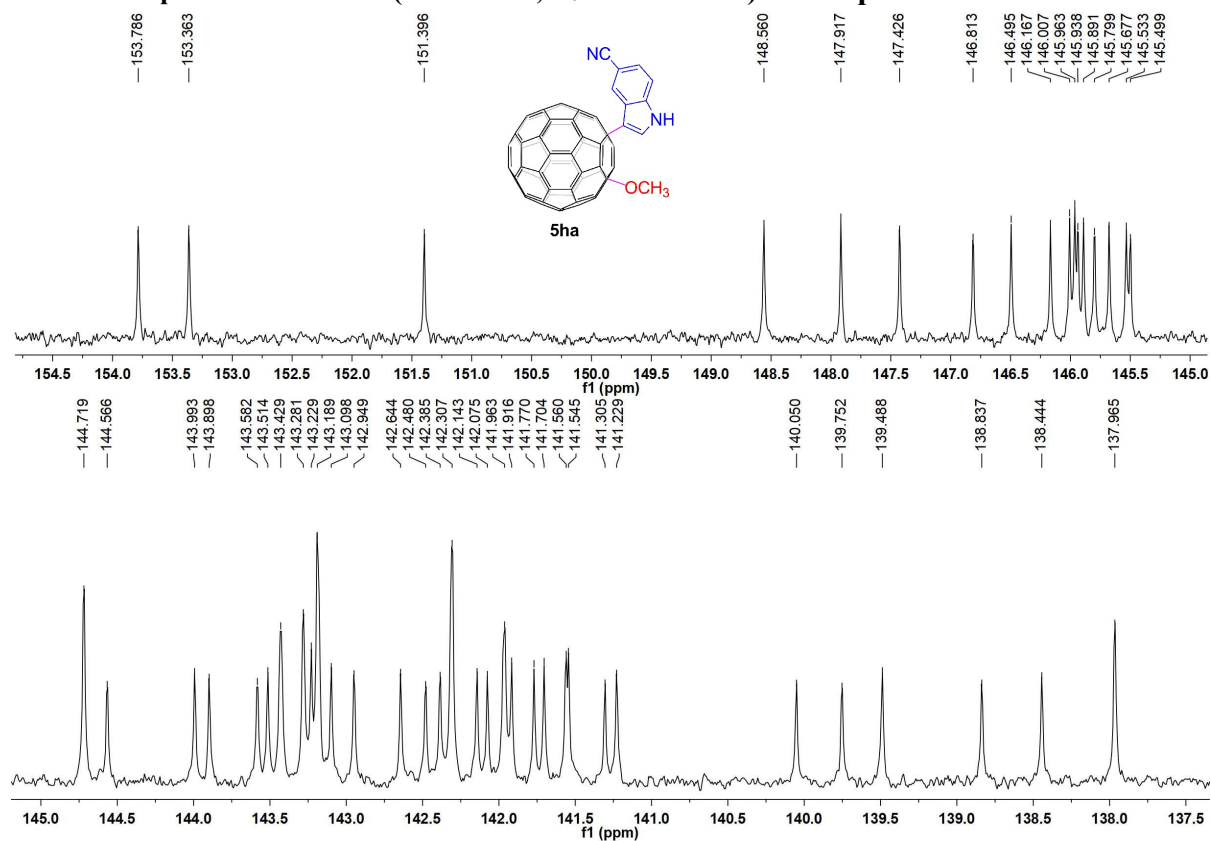

$^1\text{H}$  NMR (400 MHz,  $d_6$ -DMSO/ $\text{CS}_2$ ) of compound 5ia

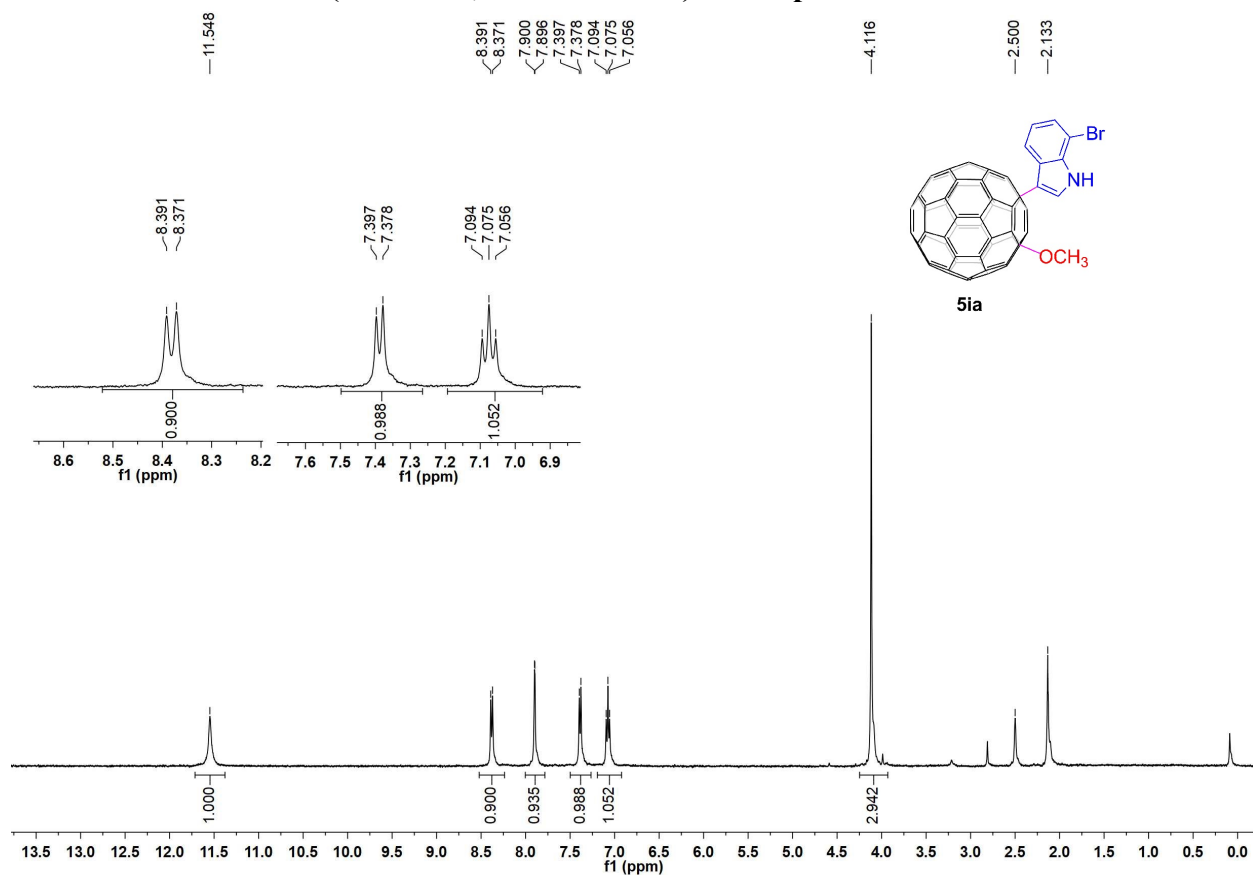



Chemical structure of **5ia** is shown above the spectrum. The structure is a C<sub>80</sub> fullerene cage substituted with a 2-bromo-1-methoxy-1H-indol-3-yl group.

**1H NMR spectrum (CDCl<sub>3</sub>) data:**

| Chemical Shift (ppm) |
|----------------------|
| 154.44               |
| 153.84               |
| 151.99               |
| 149.148              |
| 148.142              |
| 147.620              |
| 147.137              |
| 146.898              |
| 146.408              |
| 146.320              |
| 146.233              |
| 146.173              |
| 146.137              |
| 146.102              |
| 145.890              |
| 145.810              |
| 145.748              |
| 144.929              |
| 144.797              |
| 144.184              |
| 143.941              |
| 143.796              |
| 143.776              |
| 143.672              |
| 143.511              |
| 143.500              |
| 143.449              |
| 143.411              |
| 143.376              |
| 143.250              |
| 143.082              |
| 142.697              |
| 142.629              |
| 142.565              |
| 142.552              |
| 142.495              |
| 142.397              |
| 142.376              |
| 142.208              |
| 142.166              |
| 141.978              |
| 141.792              |
| 141.750              |
| 141.557              |
| 141.451              |
| 140.326              |
| 139.951              |
| 139.721              |
| 138.954              |
| 138.741              |
| 136.822              |
| 136.746              |
| 135.003              |
| 126.747              |
| 125.367              |
| 124.116              |
| 120.282              |
| 118.968              |
| 115.201              |
| 105.187              |
| 80.514               |
| 55.484               |
| 54.167               |
| 40.145               |
| 39.937               |
| 39.728               |
| 39.520               |
| 39.312               |
| 39.104               |
| 38.896               |
| 29.653               |
| 29.398               |

Figure S10 displays the  $^{13}\text{C}$  NMR spectra of compound **5ia**. The chemical structure of **5ia** is shown above the spectra, featuring a C<sub>60</sub> fullerene cage with a bromophenyl group and a methoxy group.

The top spectrum shows the  $^{13}\text{C}$  NMR spectrum of **5ia** in  $\text{CDCl}_3$ . The x-axis represents the chemical shift in ppm, ranging from 155.0 to 144.5. Key peaks are labeled with their chemical shifts: 154.445, 153.841, 151.993, 149.148, 148.142, 147.620, 147.137, 146.898, 146.408, 146.320, 146.233, 146.173, 146.137, 146.102, 145.890, 145.810, 145.748, 144.929, and 144.797.

The bottom spectrum shows the  $^{13}\text{C}$  NMR spectrum of **5ia** in  $\text{DMSO}-d_6$ . The x-axis represents the chemical shift in ppm, ranging from 144.5 to 133.5. Key peaks are labeled with their chemical shifts: 144.194, 143.796, 143.776, 143.672, 143.511, 143.500, 143.449, 143.411, 143.376, 143.250, 143.087, 142.629, 142.565, 142.552, 142.495, 142.397, 142.376, 142.208, 142.166, 141.978, 141.792, 141.750, 141.557, 141.451, 140.326, 139.951, 139.721, 138.954, 138.741, 136.822, 136.746, and 135.003.

**<sup>1</sup>H NMR (400 MHz , d<sub>6</sub>-DMSO/CS<sub>2</sub>) of compound 5ja**

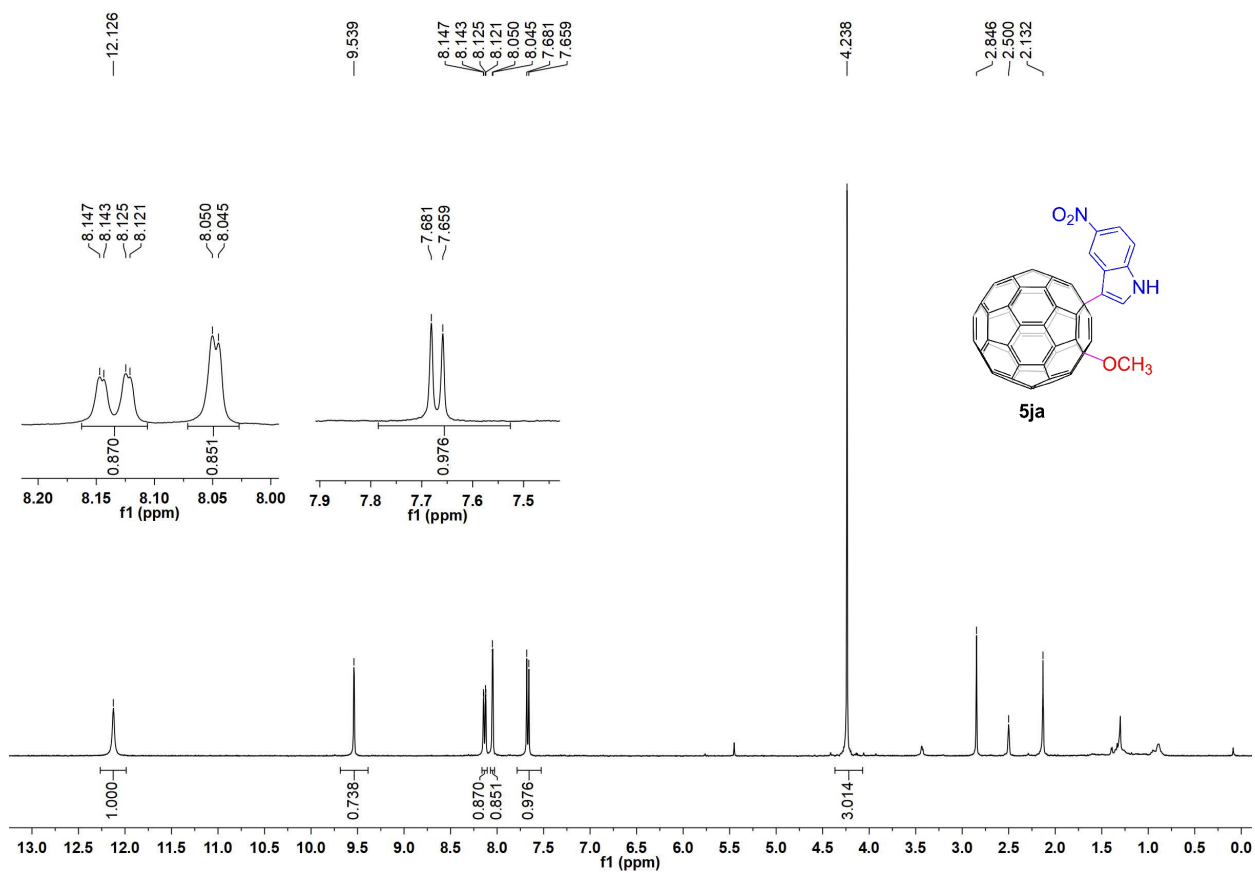

**<sup>13</sup>C NMR (100 MHz , d<sub>6</sub>-DMSO/CS<sub>2</sub>) of compound 5ja**

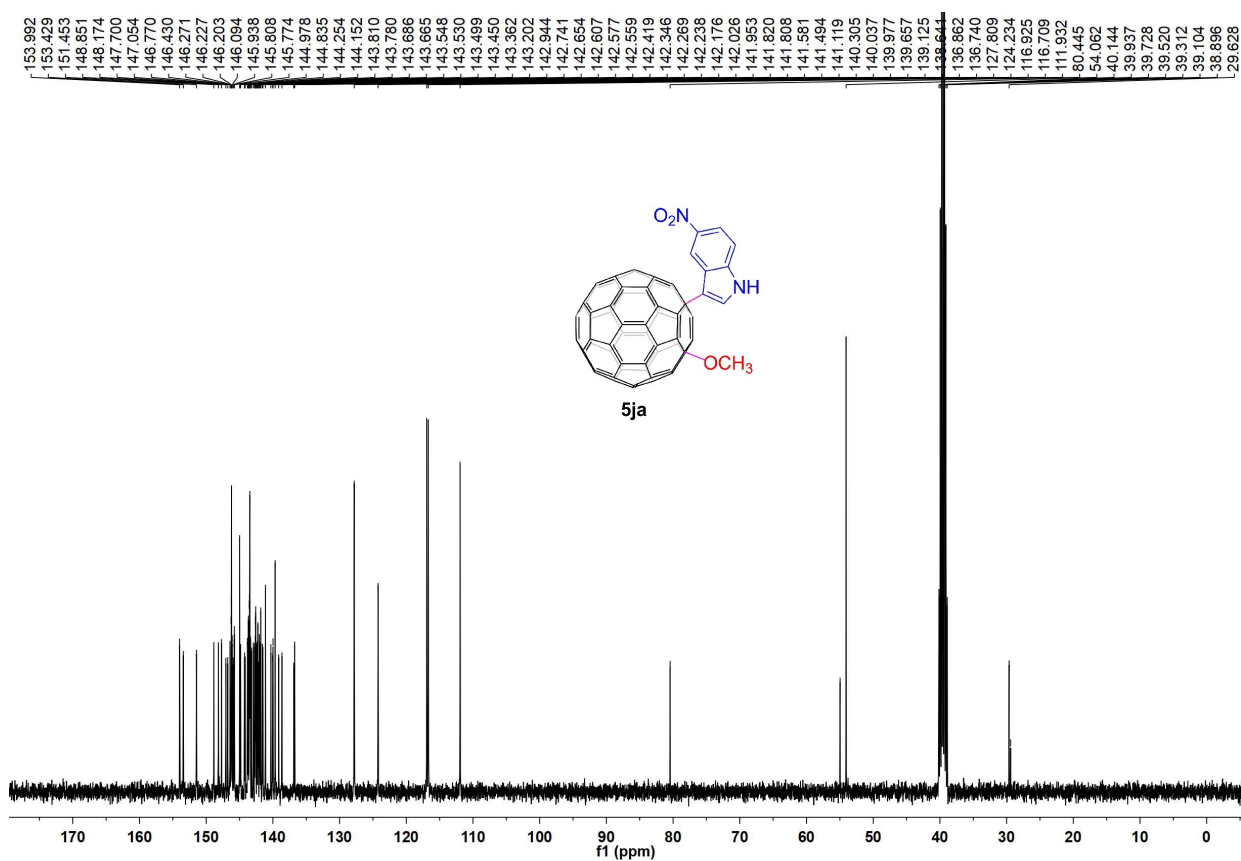

Expanded  $^{13}\text{C}$  NMR (100 MHz,  $\text{d}_6\text{-DMSO}/\text{CS}_2$ ) of compound 5ja

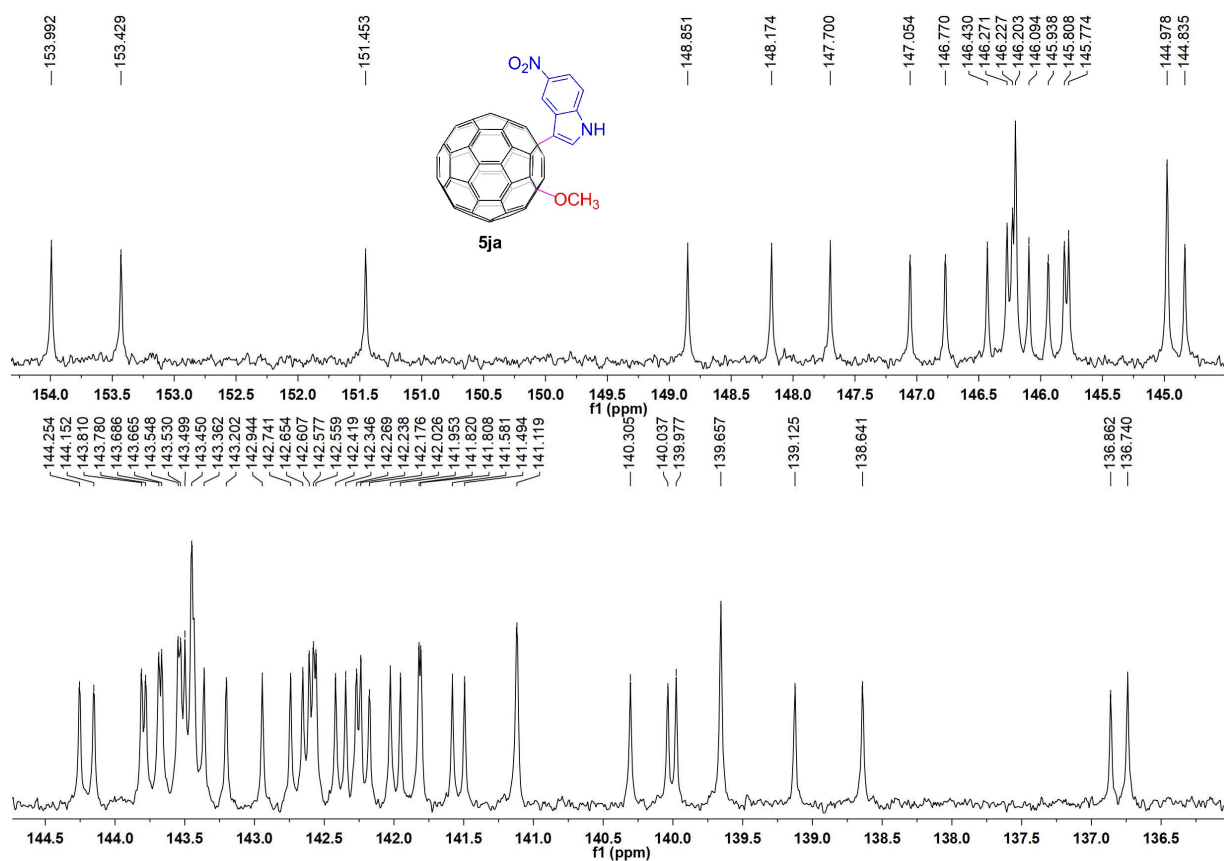

$^1\text{H}$  NMR (400 MHz,  $\text{d}_6\text{-DMSO}/\text{CS}_2$ ) of compound 5ka

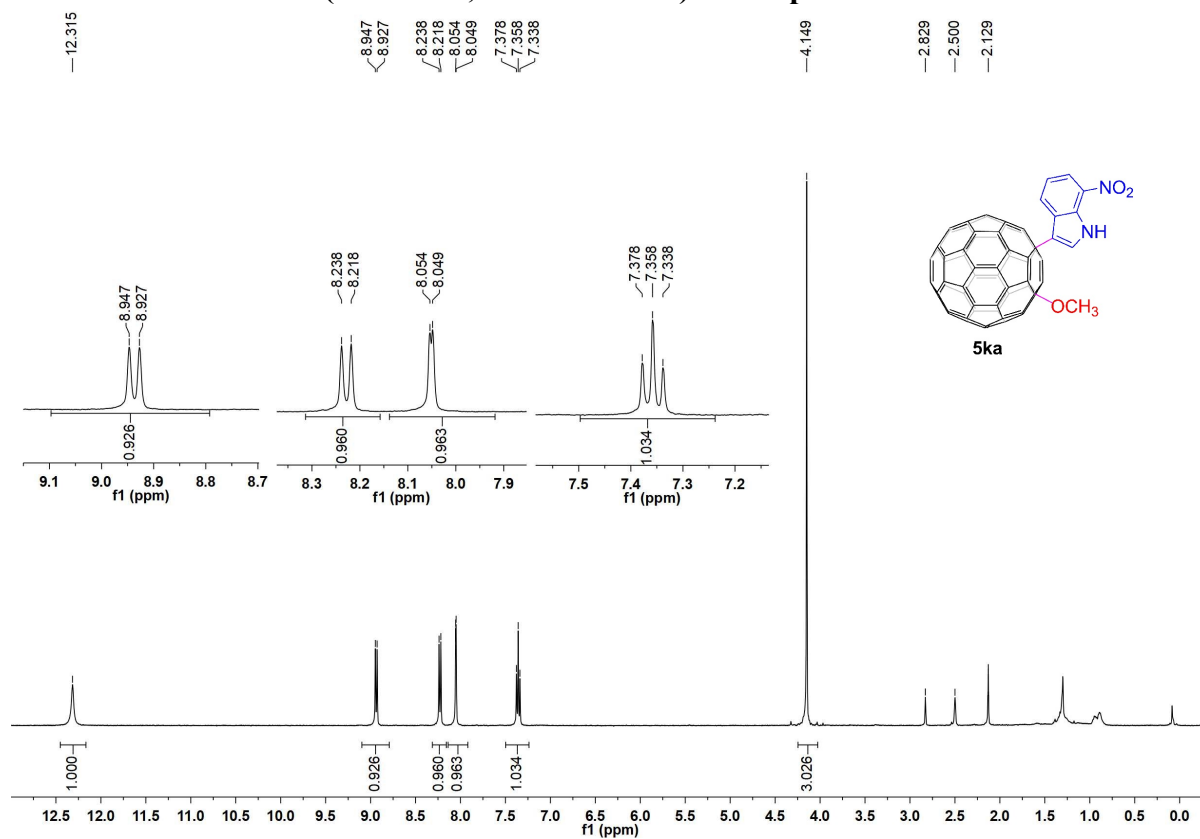

**$^{13}\text{C}$  NMR (100 MHz,  $\text{d}_6\text{-DMSO}/\text{CS}_2$ ) of compound 5ka**

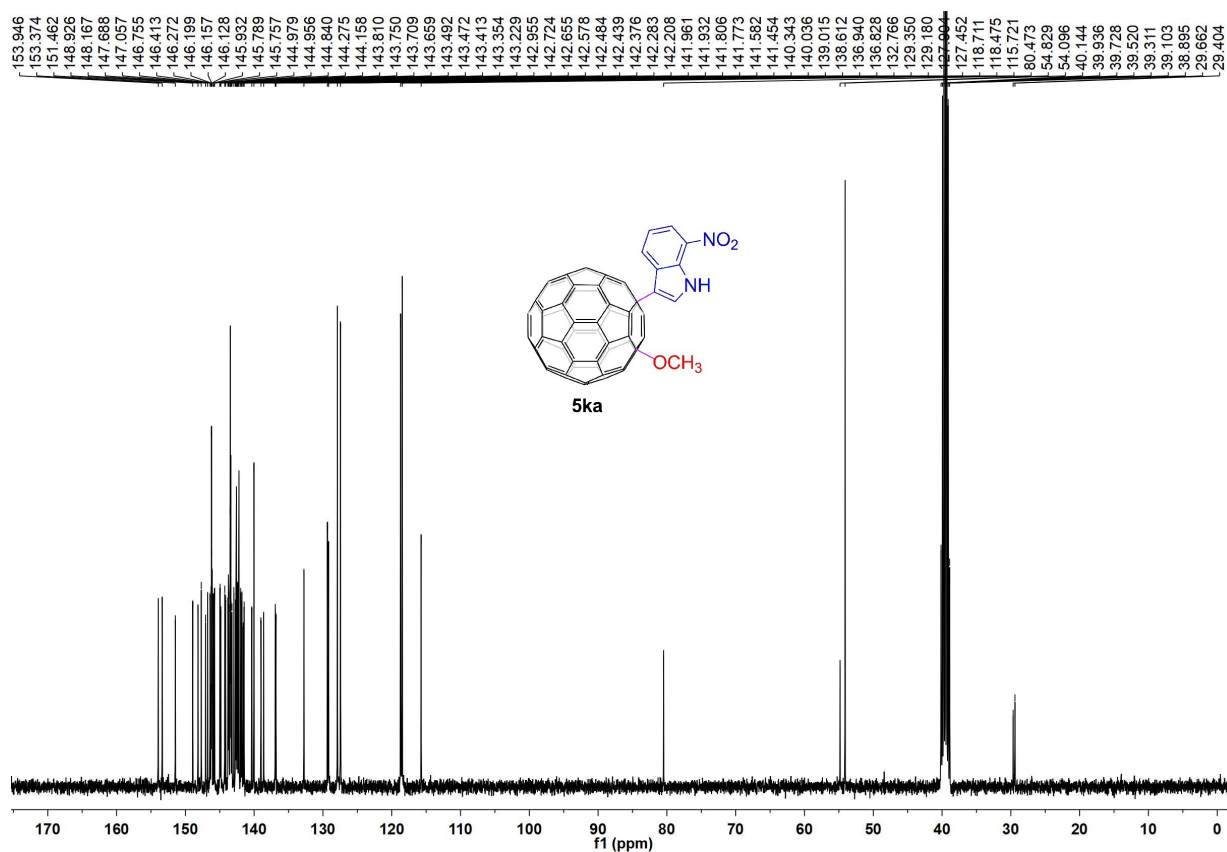

**Expanded  $^{13}\text{C}$  NMR (100 MHz,  $\text{d}_6\text{-DMSO}/\text{CS}_2$ ) of compound 5ka**

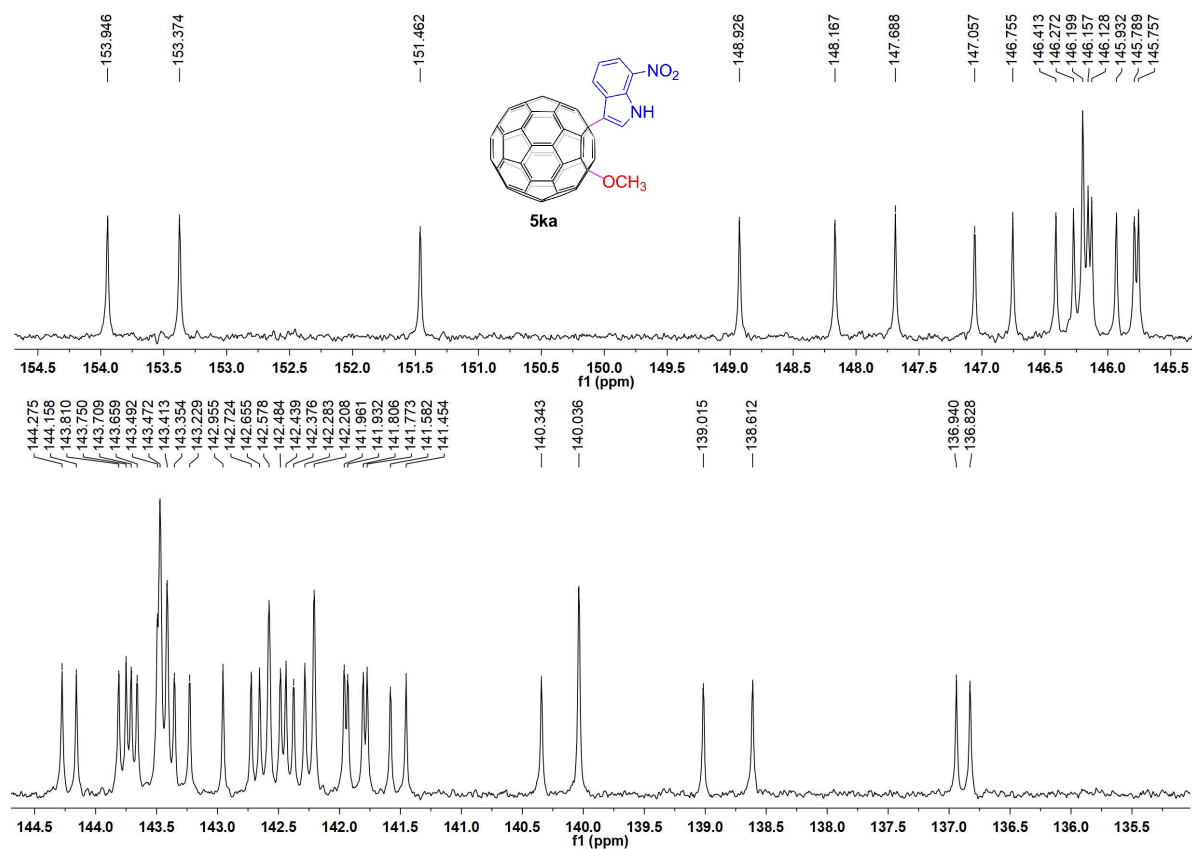

**<sup>1</sup>H NMR (400 MHz, d<sub>6</sub>-DMSO/CS<sub>2</sub>) of compound 5la**

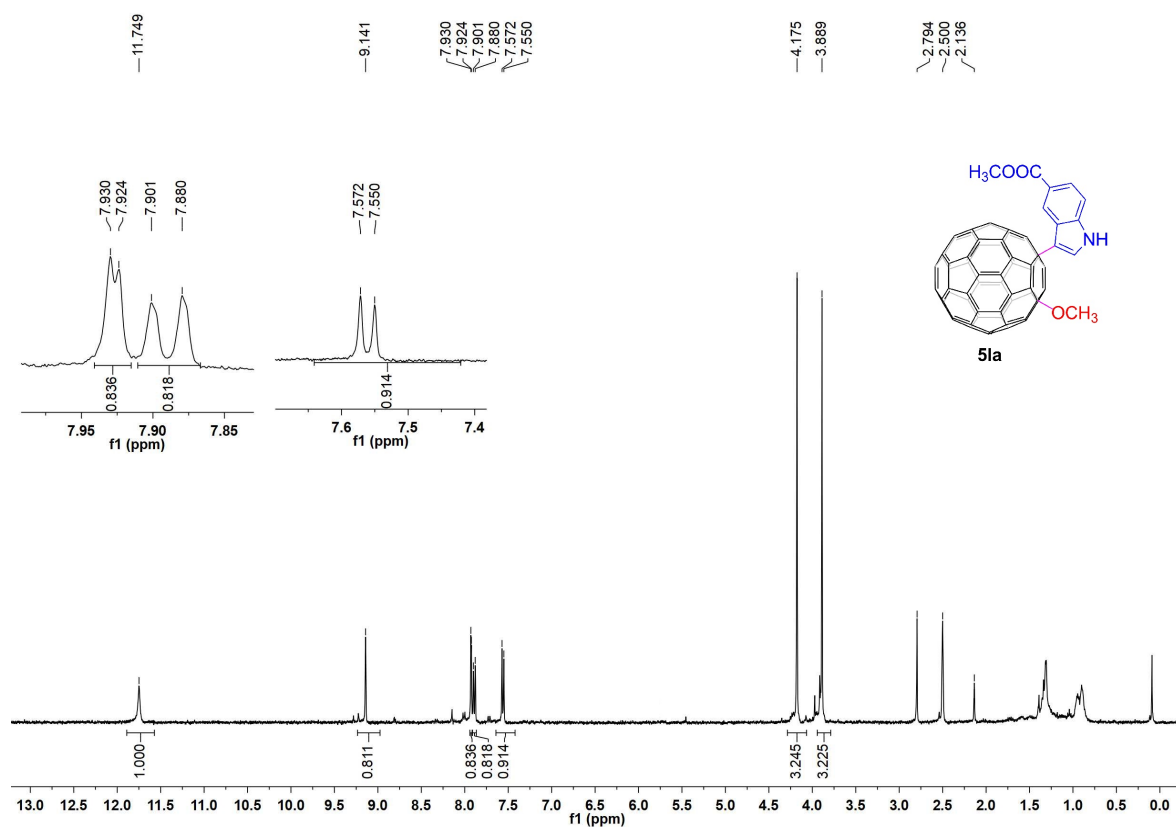

**<sup>13</sup>C NMR (150 MHz, d<sub>6</sub>-DMSO/CS<sub>2</sub>) of compound 5la**

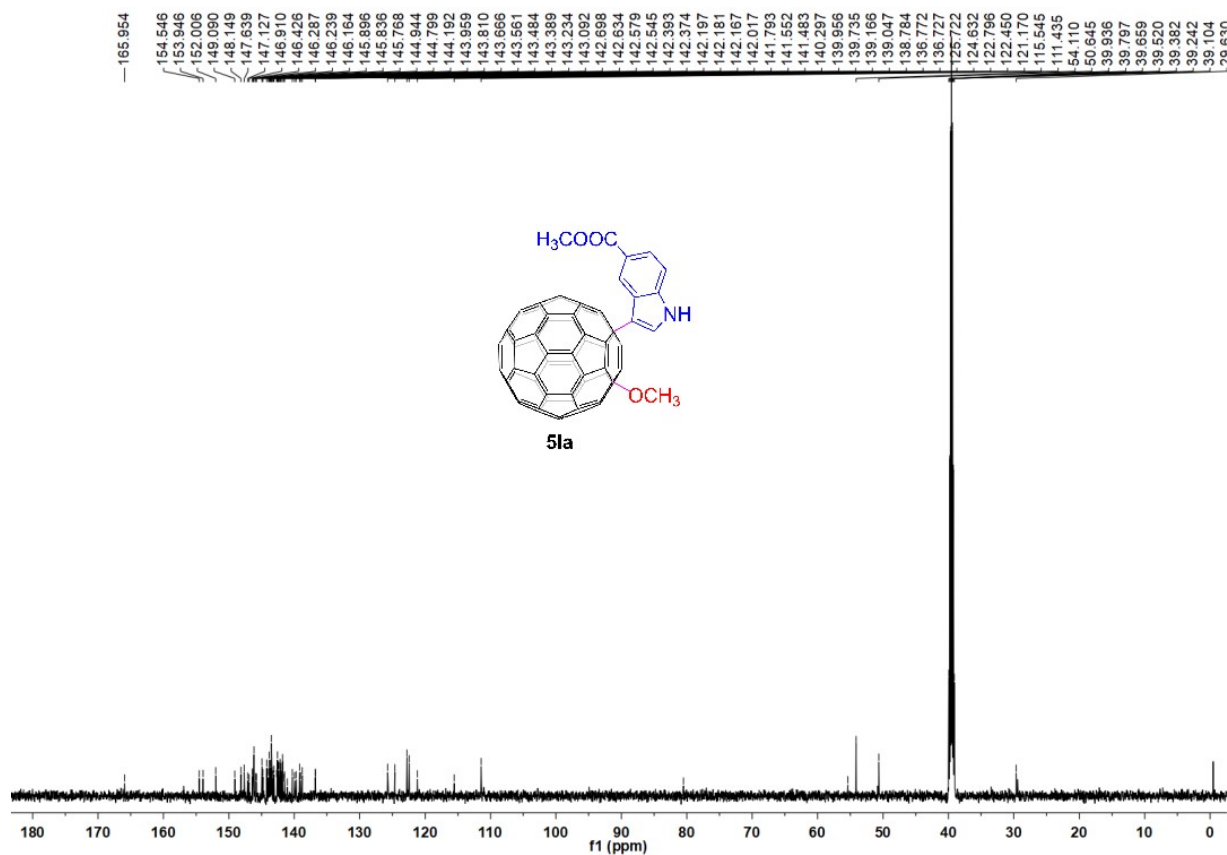

# Expanded <sup>13</sup>C NMR (150 MHz, d<sub>6</sub>-DMSO/CS<sub>2</sub>) of compound 5la

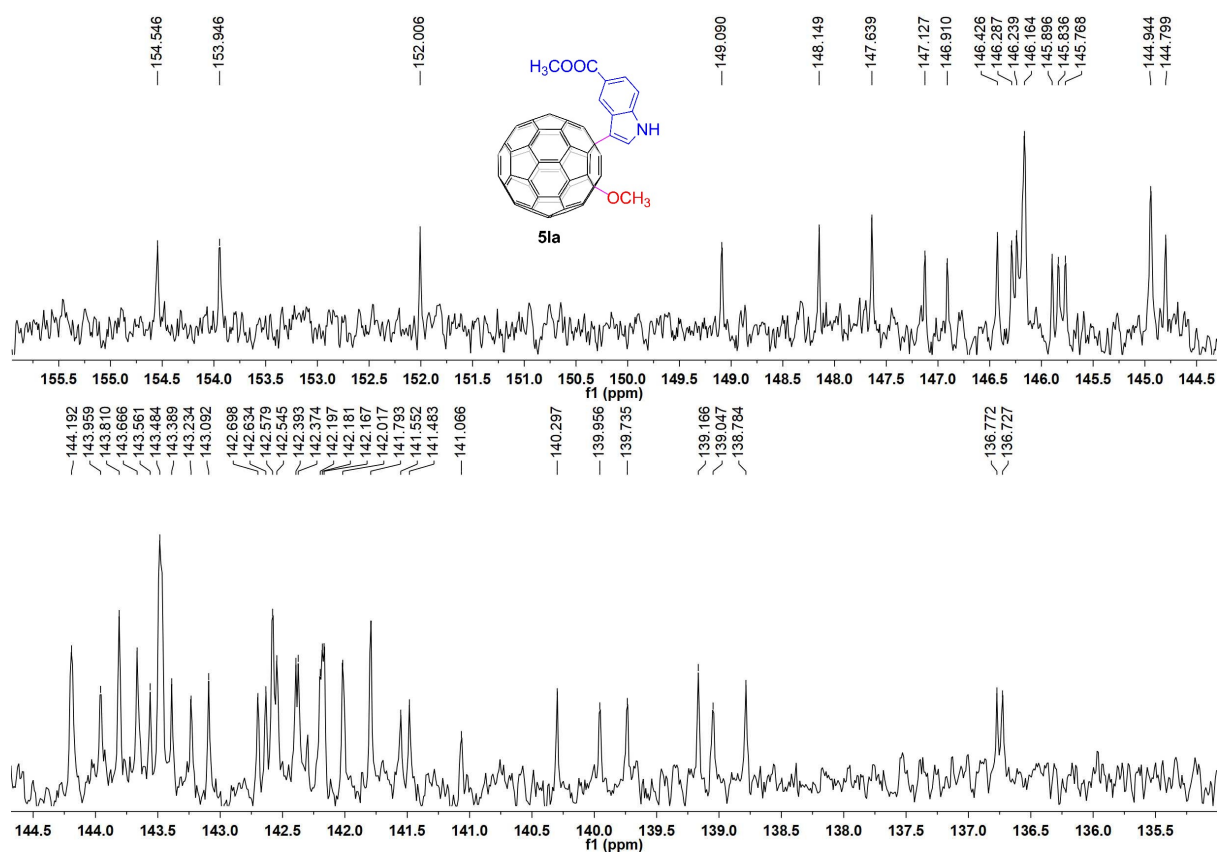

# <sup>1</sup>H NMR (400 MHz, d<sub>6</sub>-DMSO/CS<sub>2</sub>) of compound 5fa

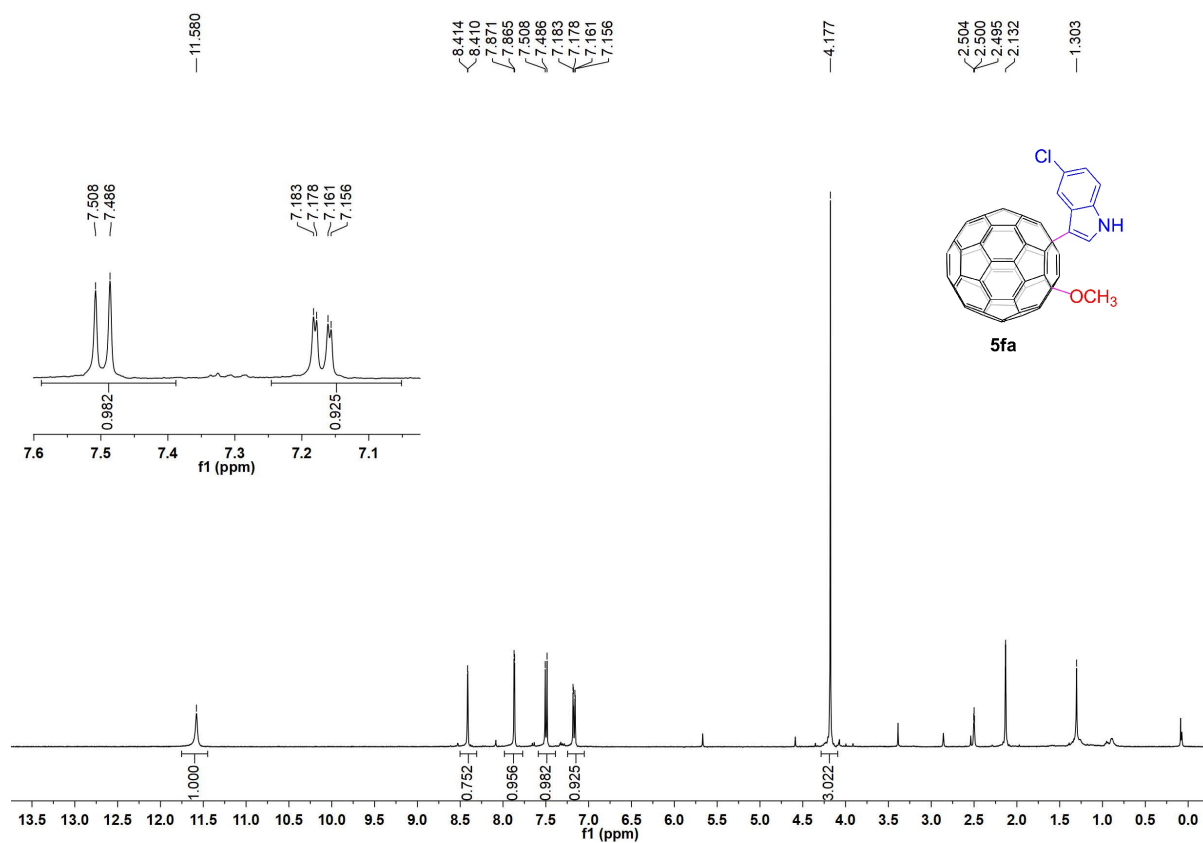



**$^{13}\text{C}$  NMR (100 MHz,  $\text{d}_6\text{-DMSO}/\text{CS}_2$ ) of compound 5fa**

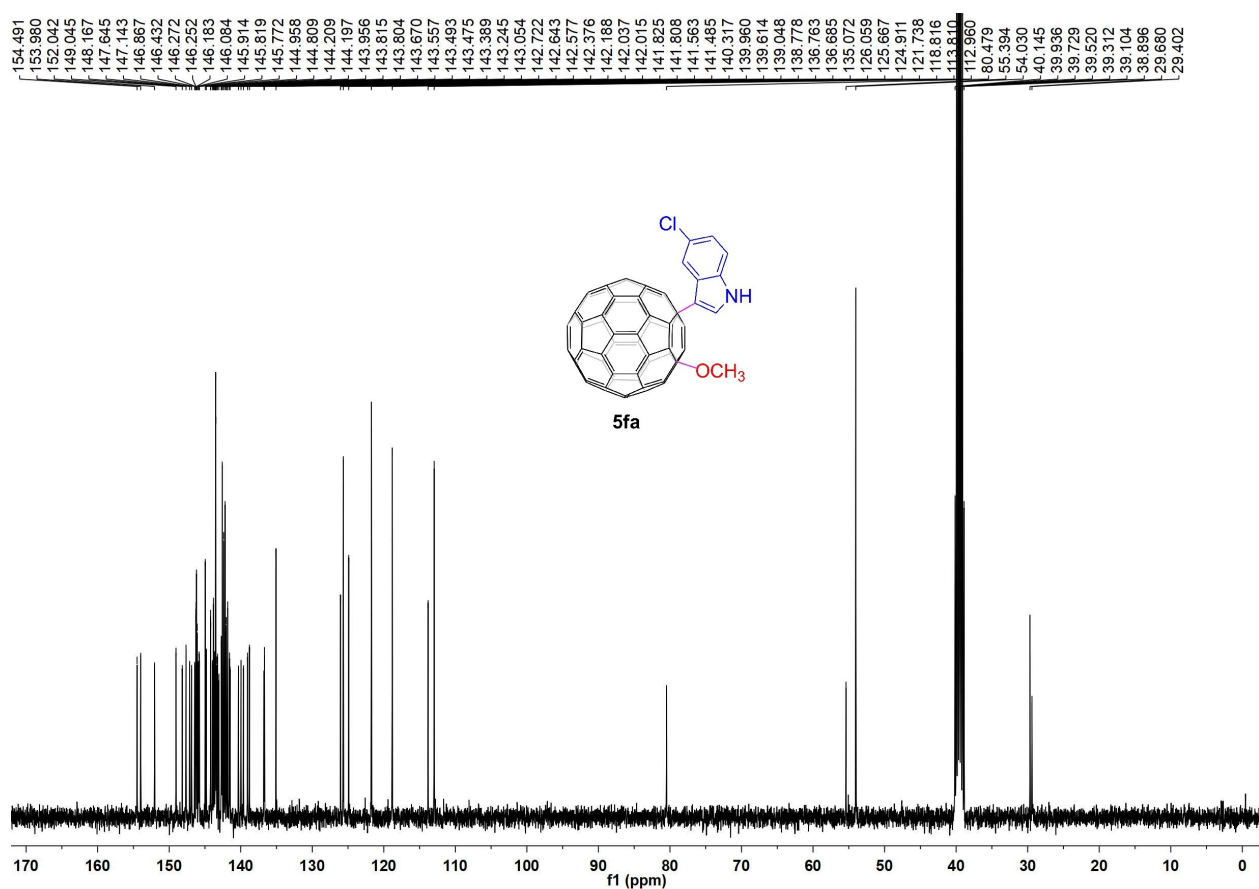

**Expanded  $^{13}\text{C}$  NMR (100 MHz,  $\text{d}_6\text{-DMSO}/\text{CS}_2$ ) of compound 5fa**

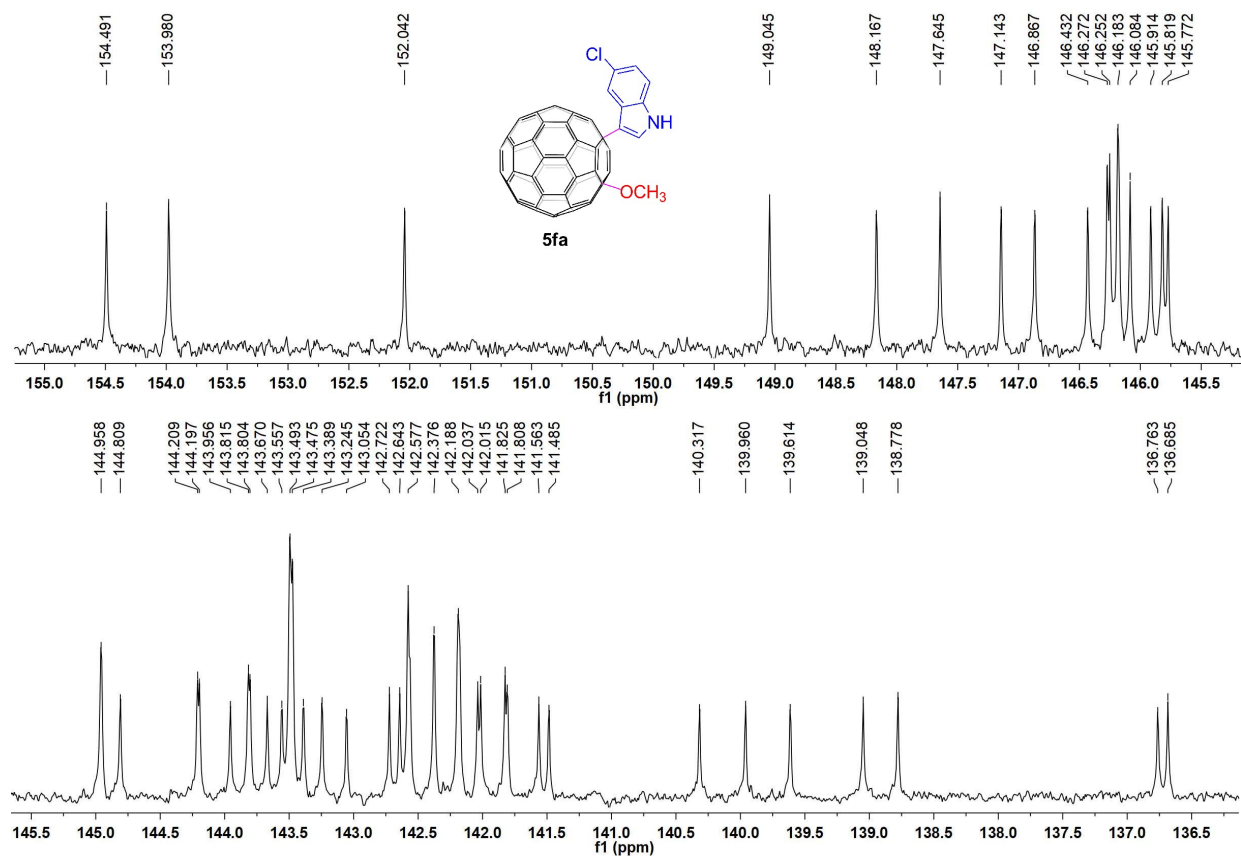



**<sup>1</sup>H NMR (400 MHz, d<sub>6</sub>-DMSO/CS<sub>2</sub>) of compound 5aa**

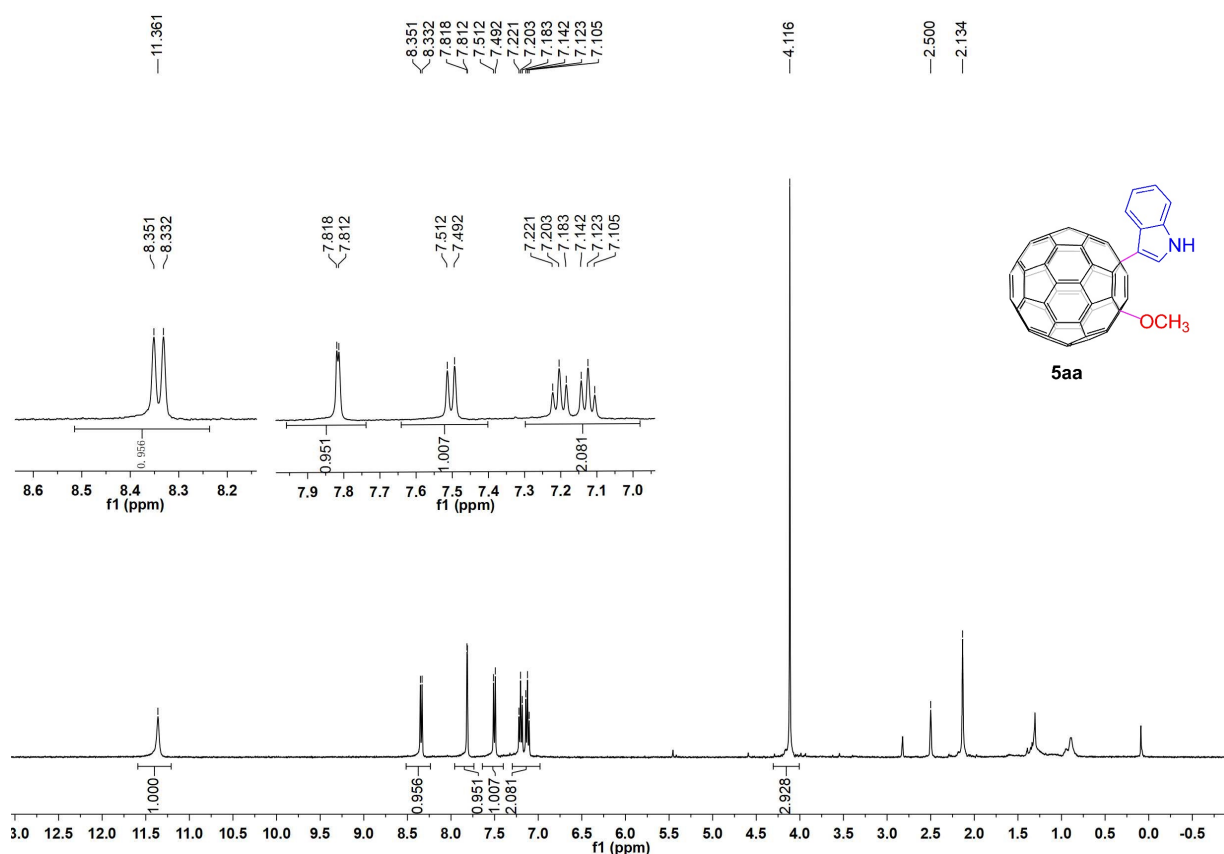

**<sup>13</sup>C NMR (100 MHz, d<sub>6</sub>-DMSO/CS<sub>2</sub>) of compound 5aa**

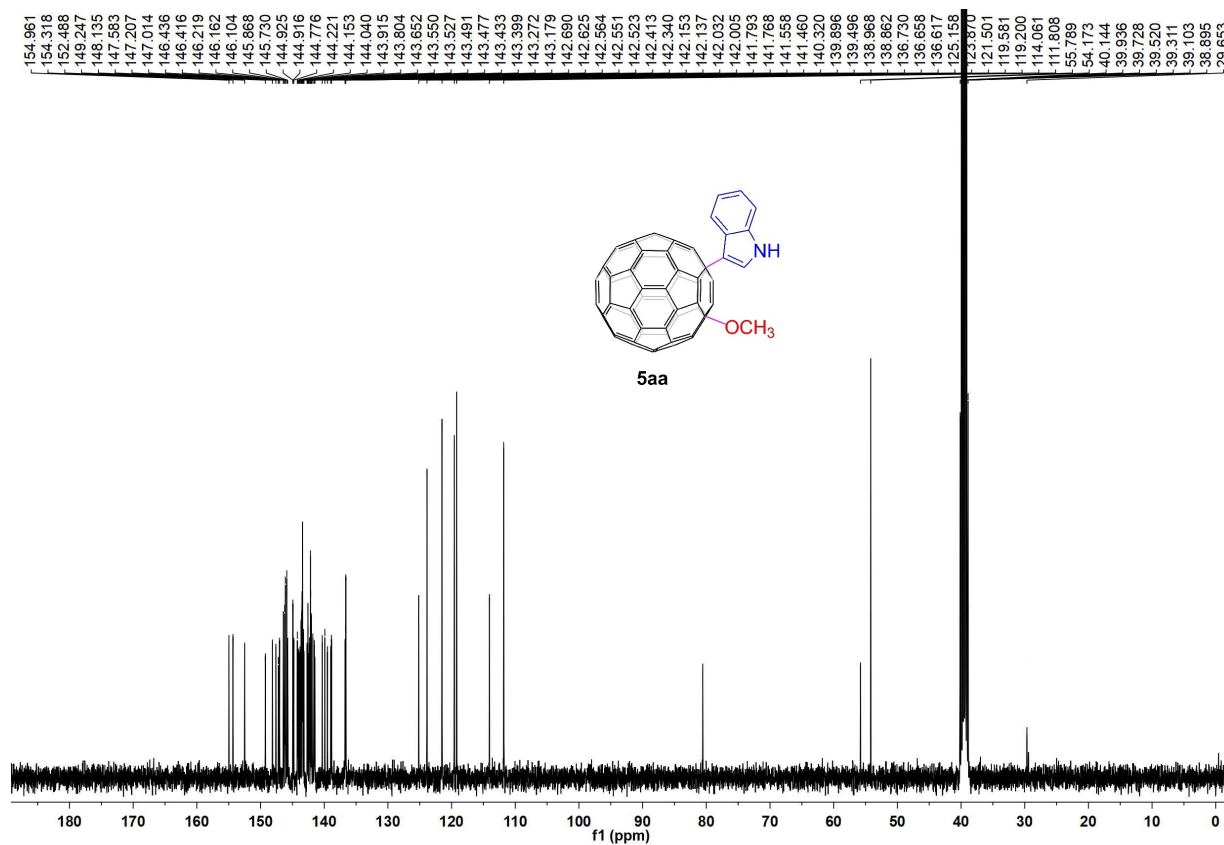

# Expanded <sup>13</sup>C NMR (100 MHz, d<sub>6</sub>-DMSO/CS<sub>2</sub>) of compound 5aa

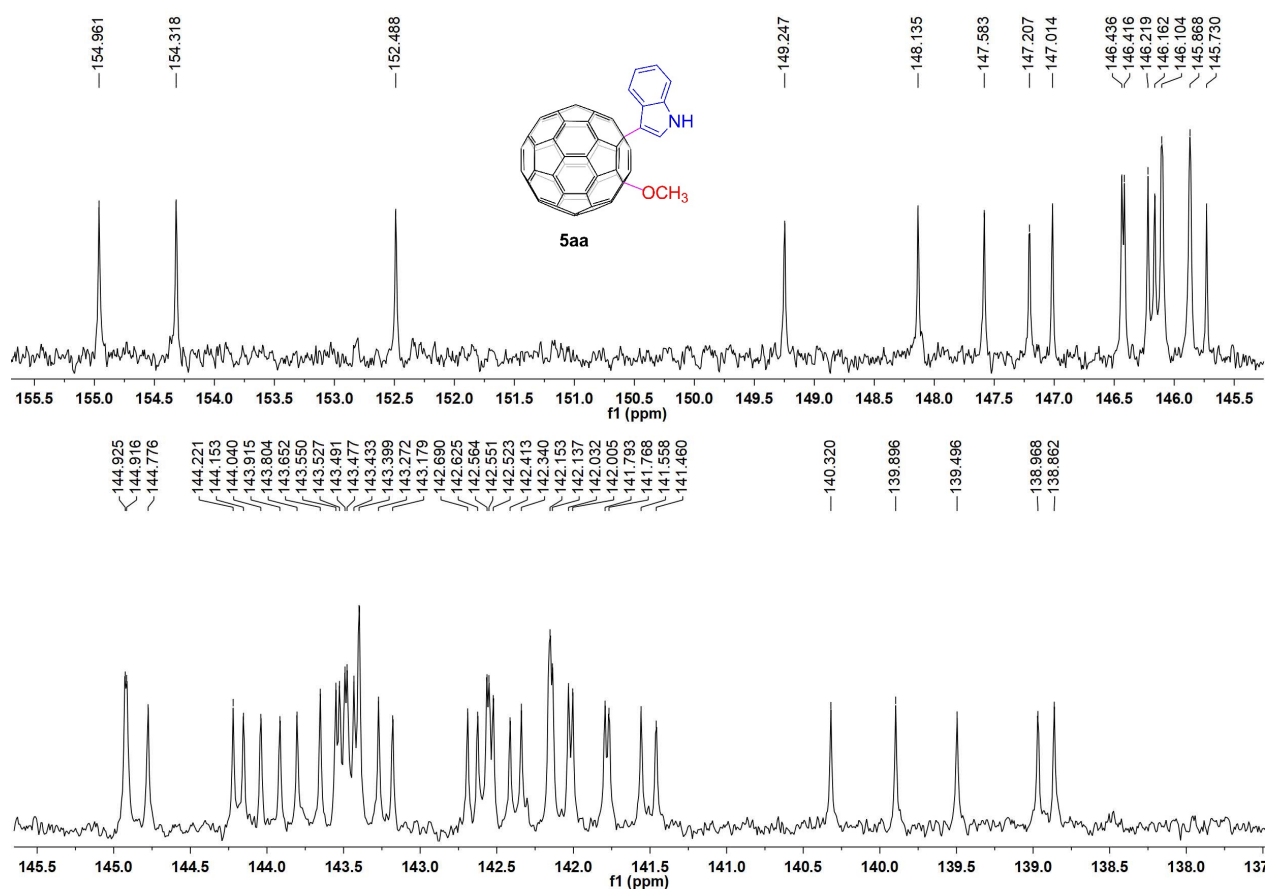

# <sup>1</sup>H NMR (400 MHz, d<sub>6</sub>-DMSO/CS<sub>2</sub>) of compound 5gb

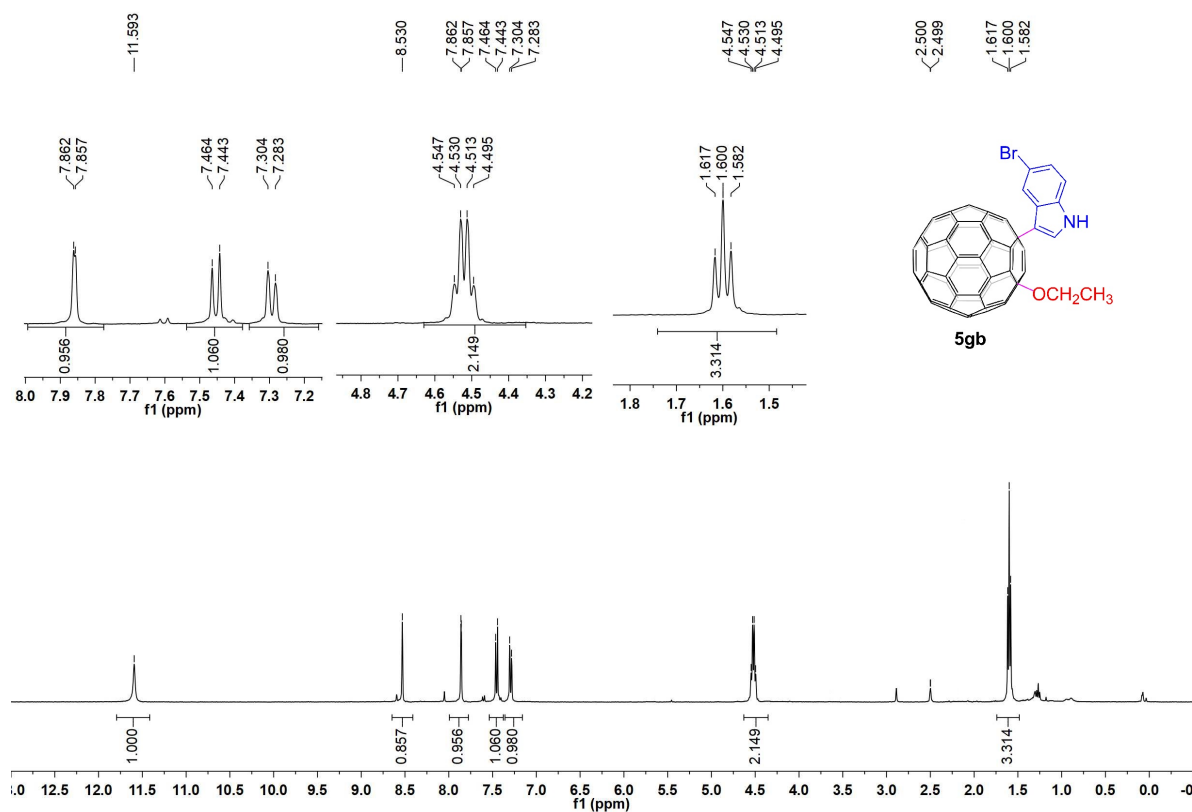

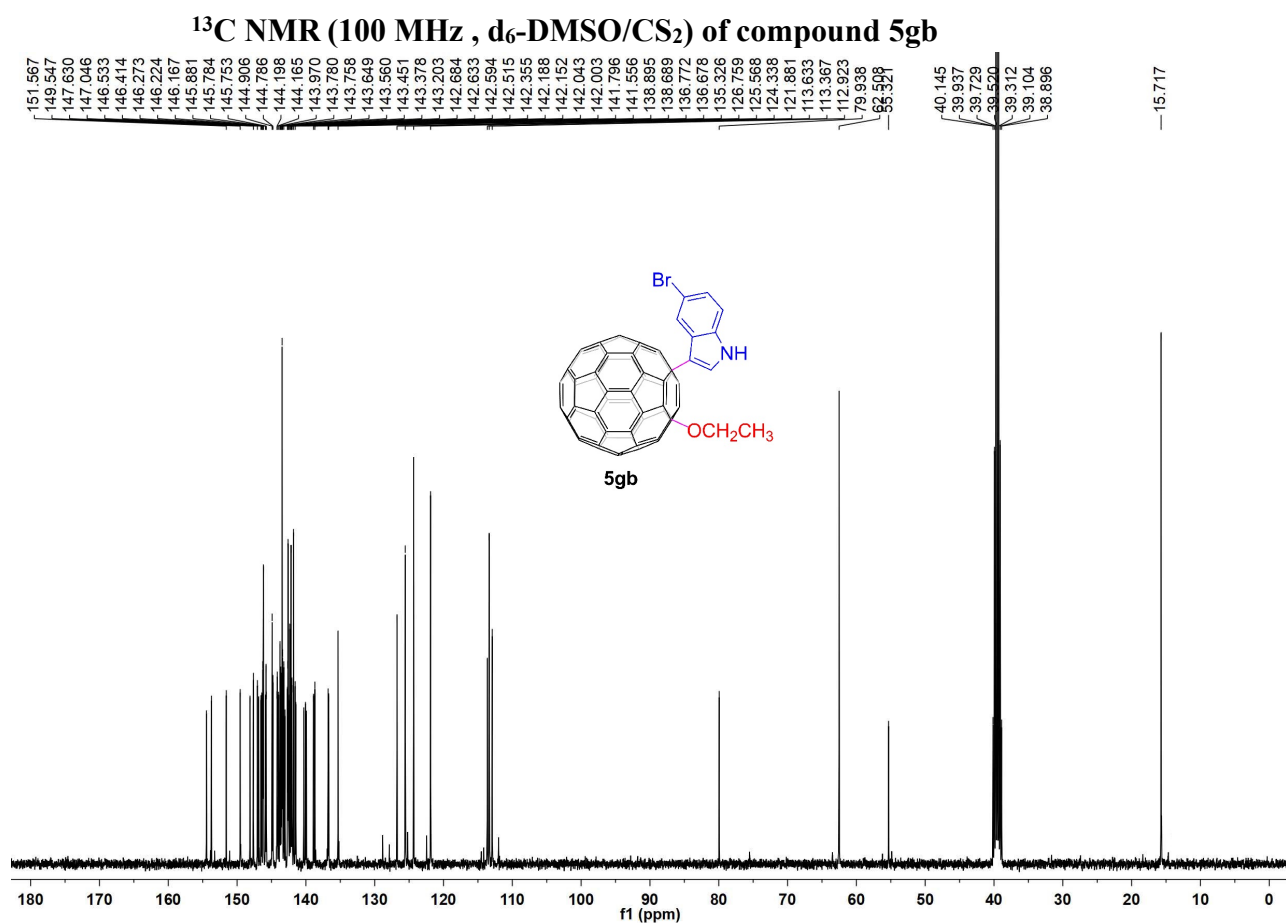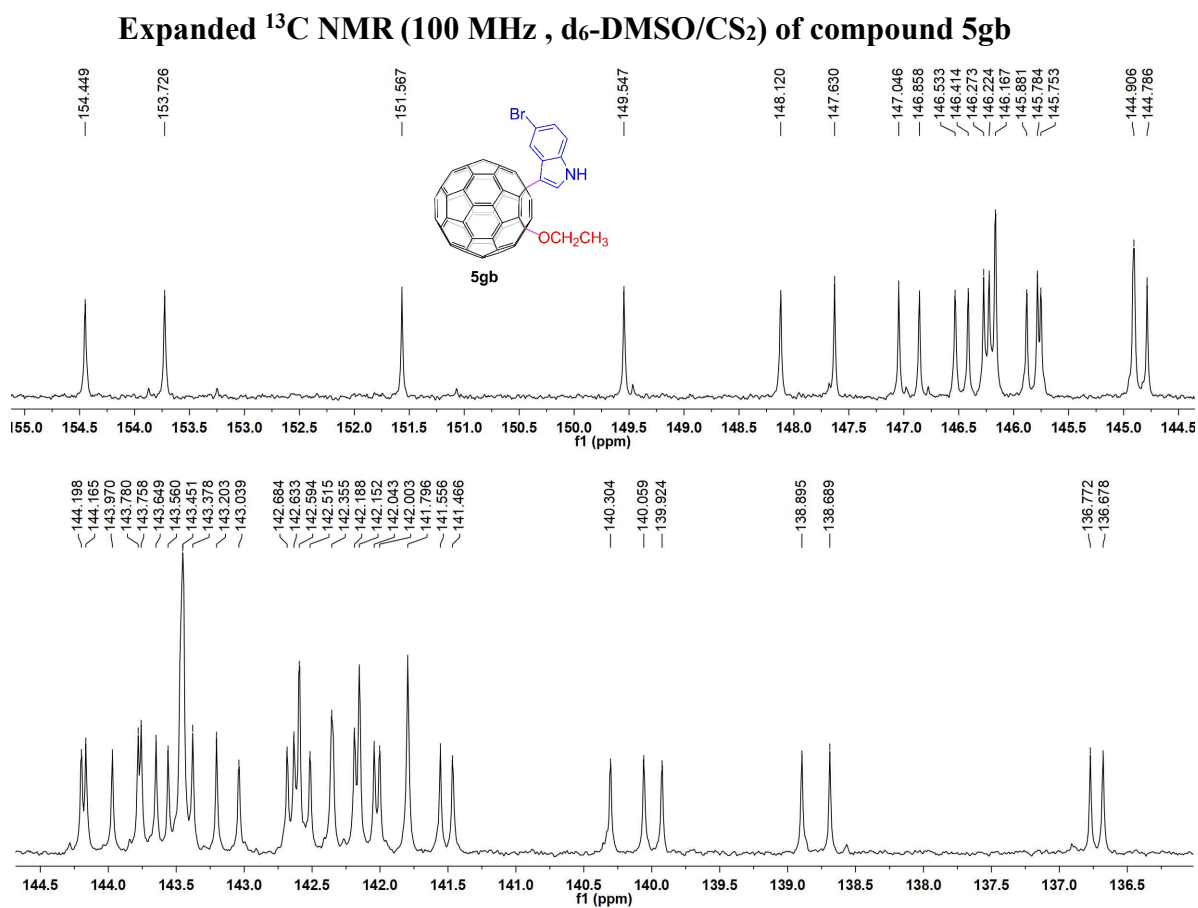

**$^1\text{H}$  NMR (400 MHz,  $\text{d}_6\text{-DMSO}/\text{CS}_2$ ) of compound 5hb**

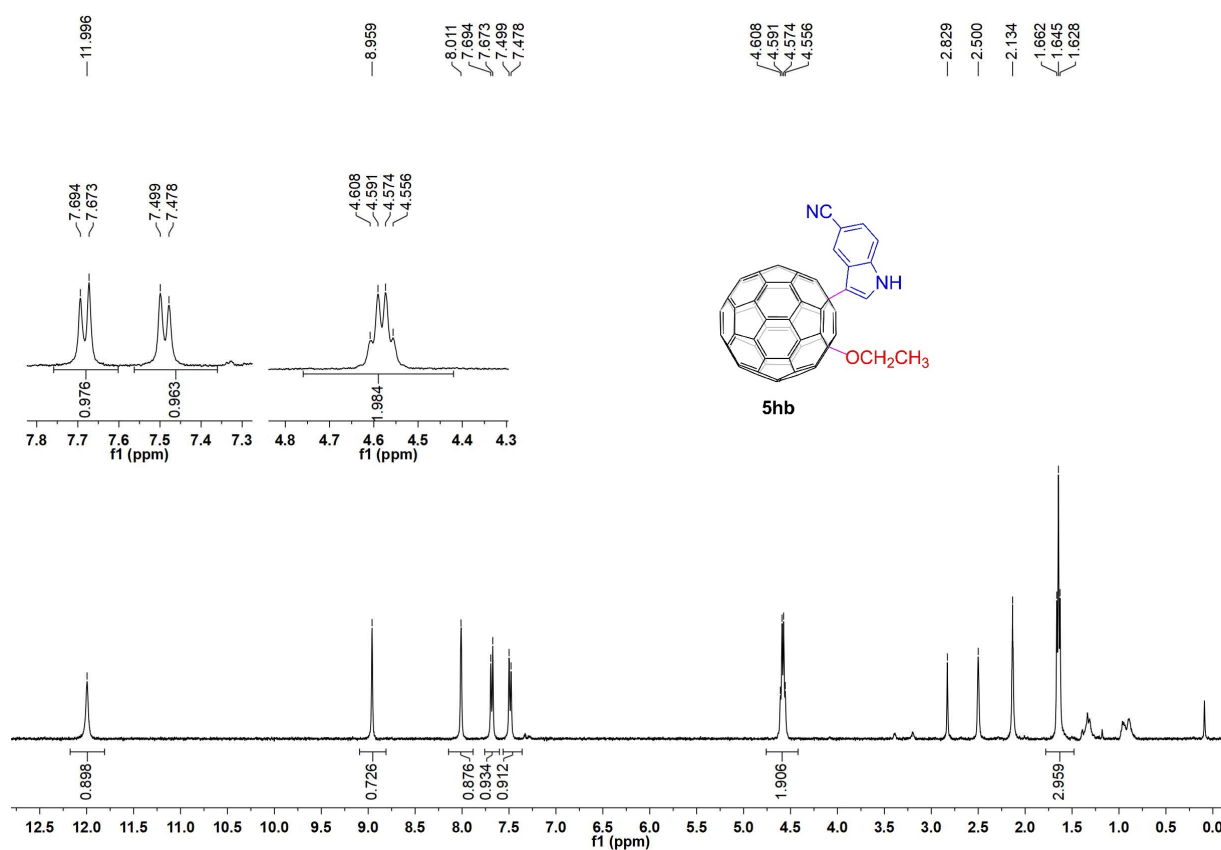

### Expanded $^{13}\text{C}$ NMR (100 MHz, $\text{d}_6\text{-DMSO}/\text{CS}_2$ ) of compound 5hb

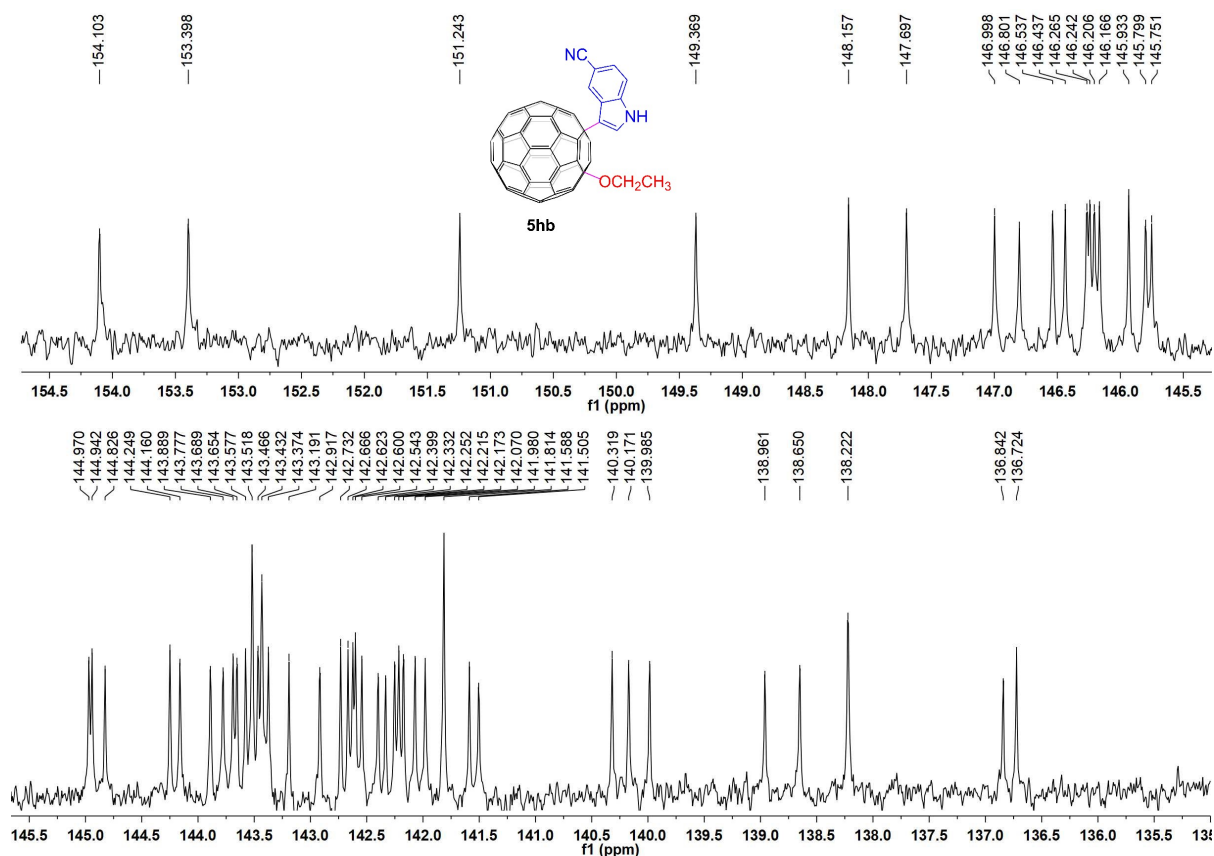

### $^1\text{H}$ NMR (400 MHz, $\text{d}_6\text{-DMSO}/\text{CS}_2$ ) of compound 5ab

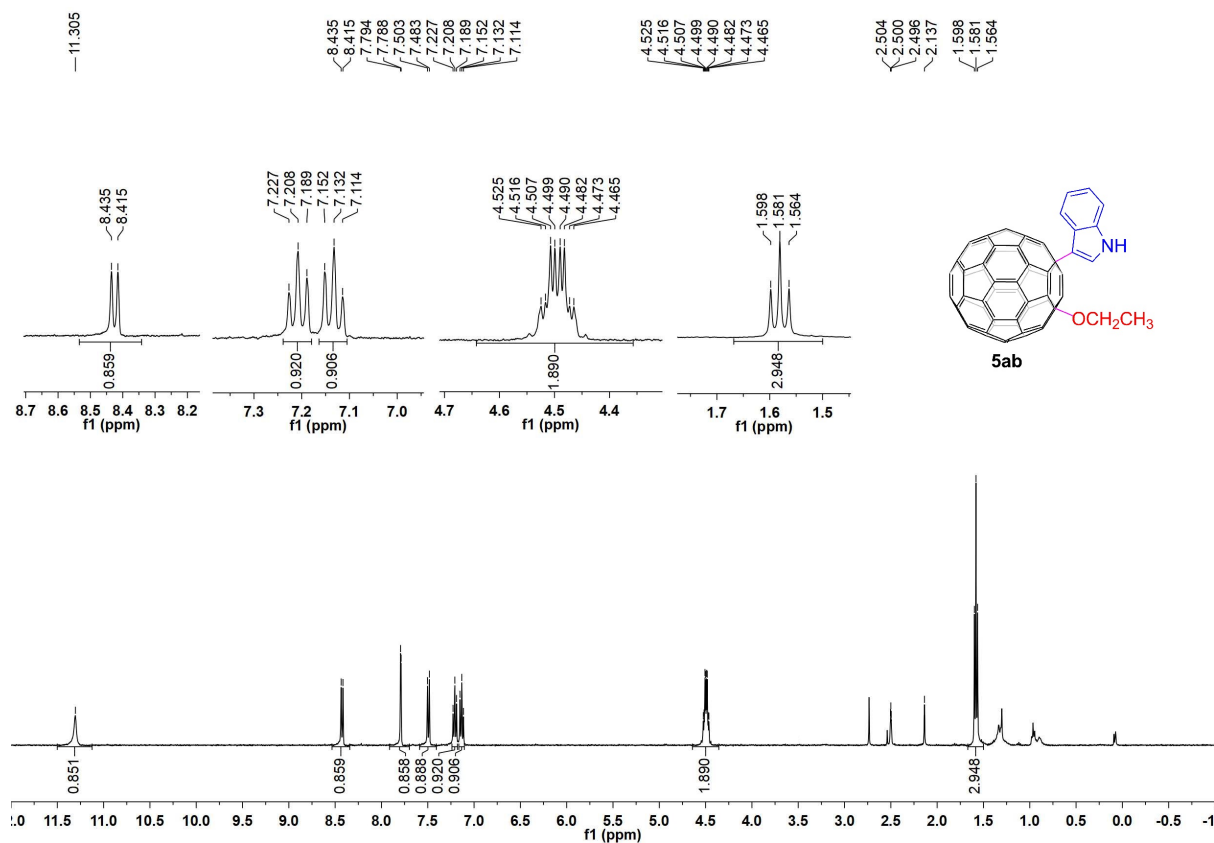

**$^{13}\text{C}$  NMR (100 MHz,  $\text{d}_6\text{-DMSO}/\text{CS}_2$ ) of compound 5ab**

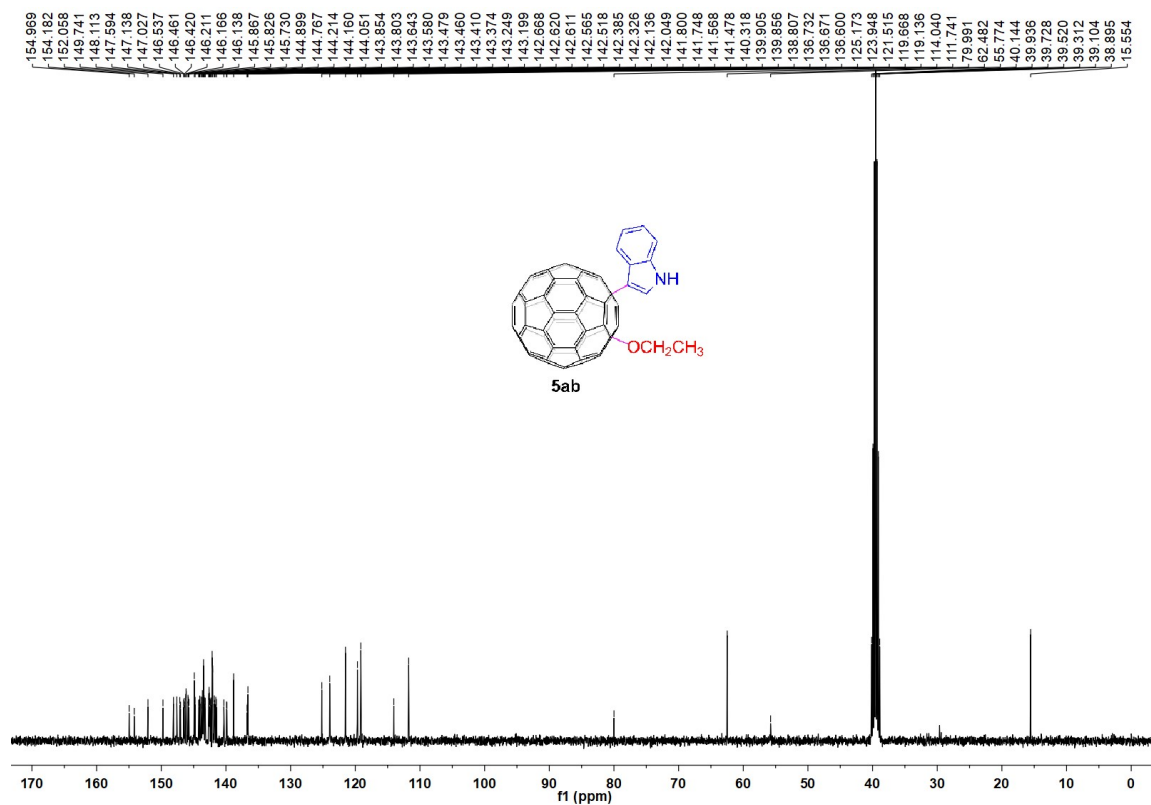

**Expanded  $^{13}\text{C}$  NMR (100 MHz,  $\text{d}_6\text{-DMSO}/\text{CS}_2$ ) of compound 5ab**

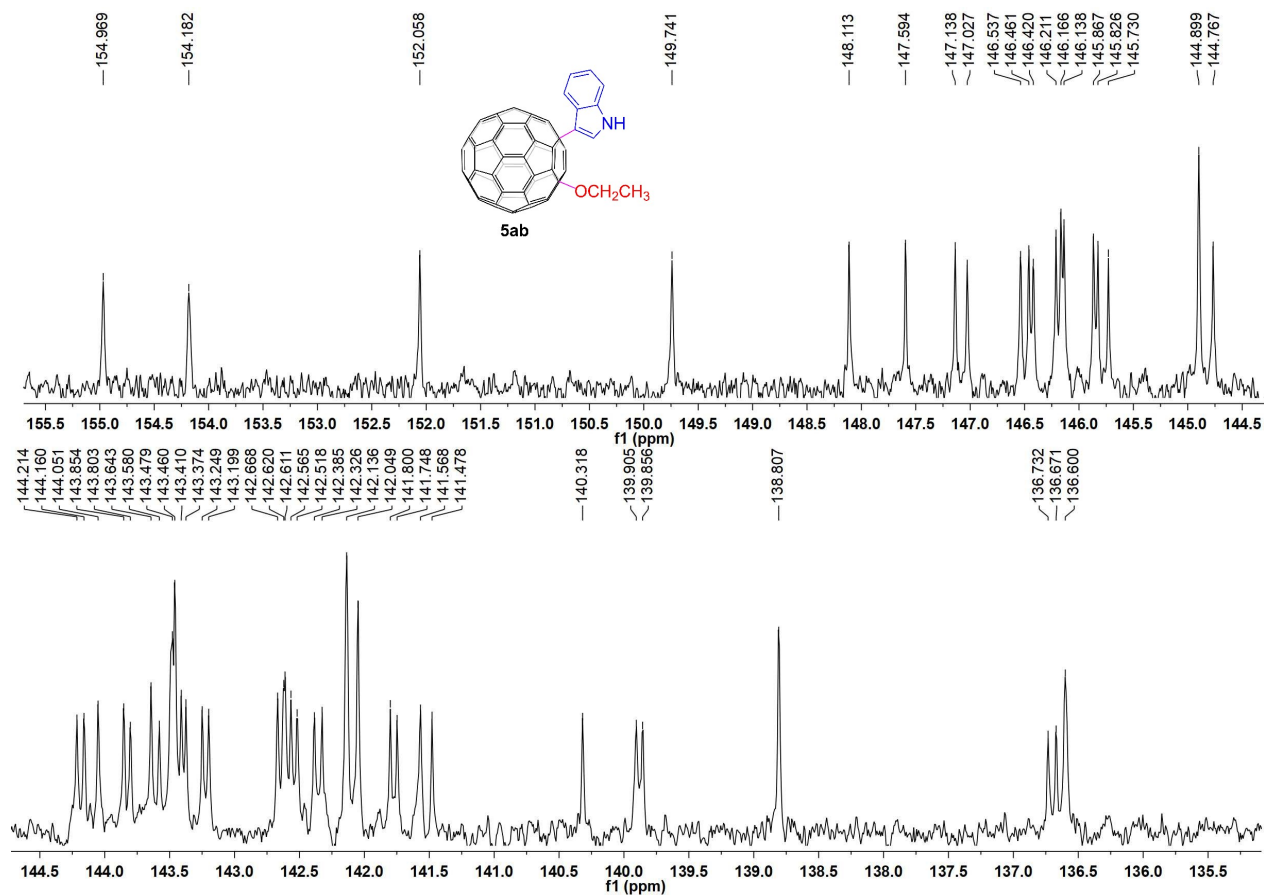



**<sup>1</sup>H NMR (400 MHz, d<sub>6</sub>-DMSO/CS<sub>2</sub>) of compound 5hc**

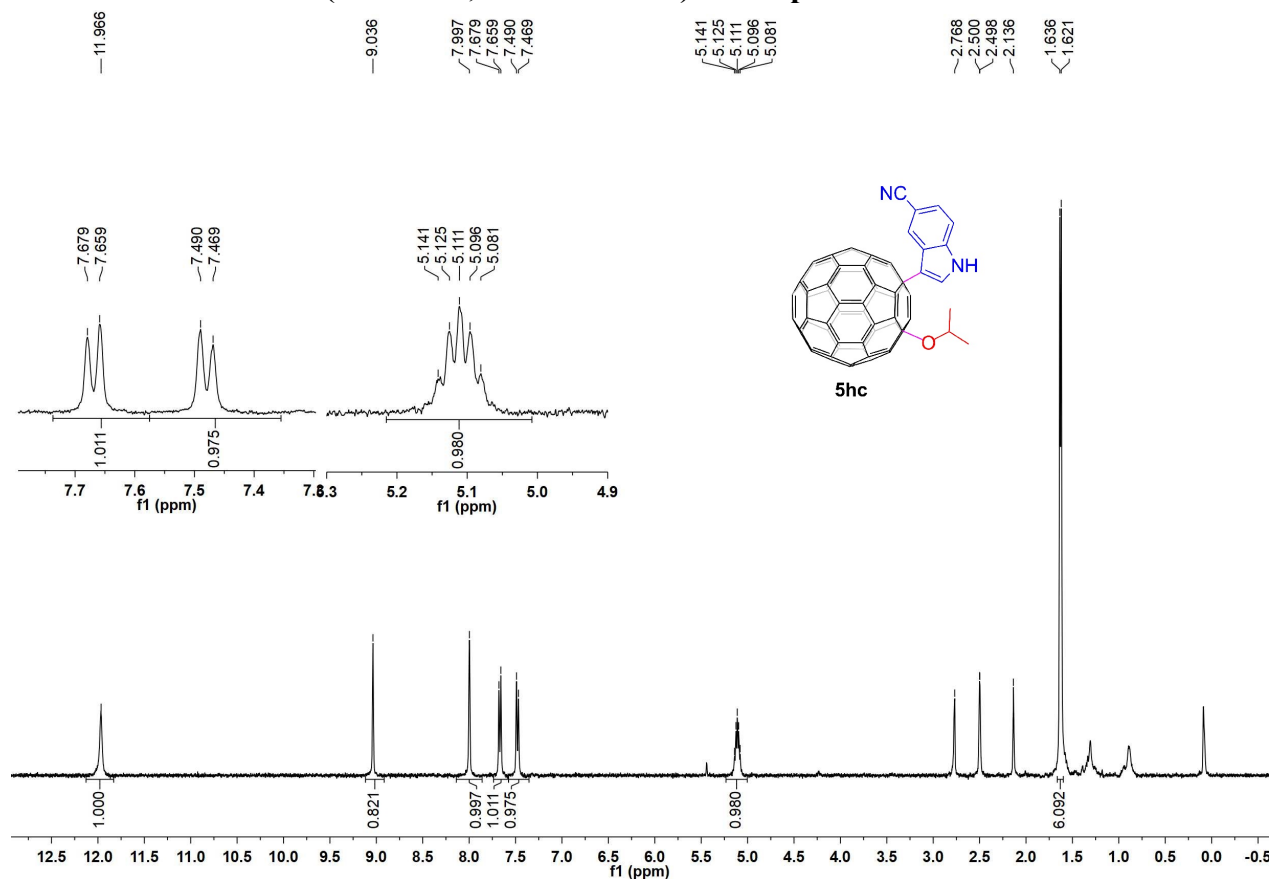

**<sup>13</sup>C NMR (100 MHz, d<sub>6</sub>-DMSO/CS<sub>2</sub>) of compound 5hc**

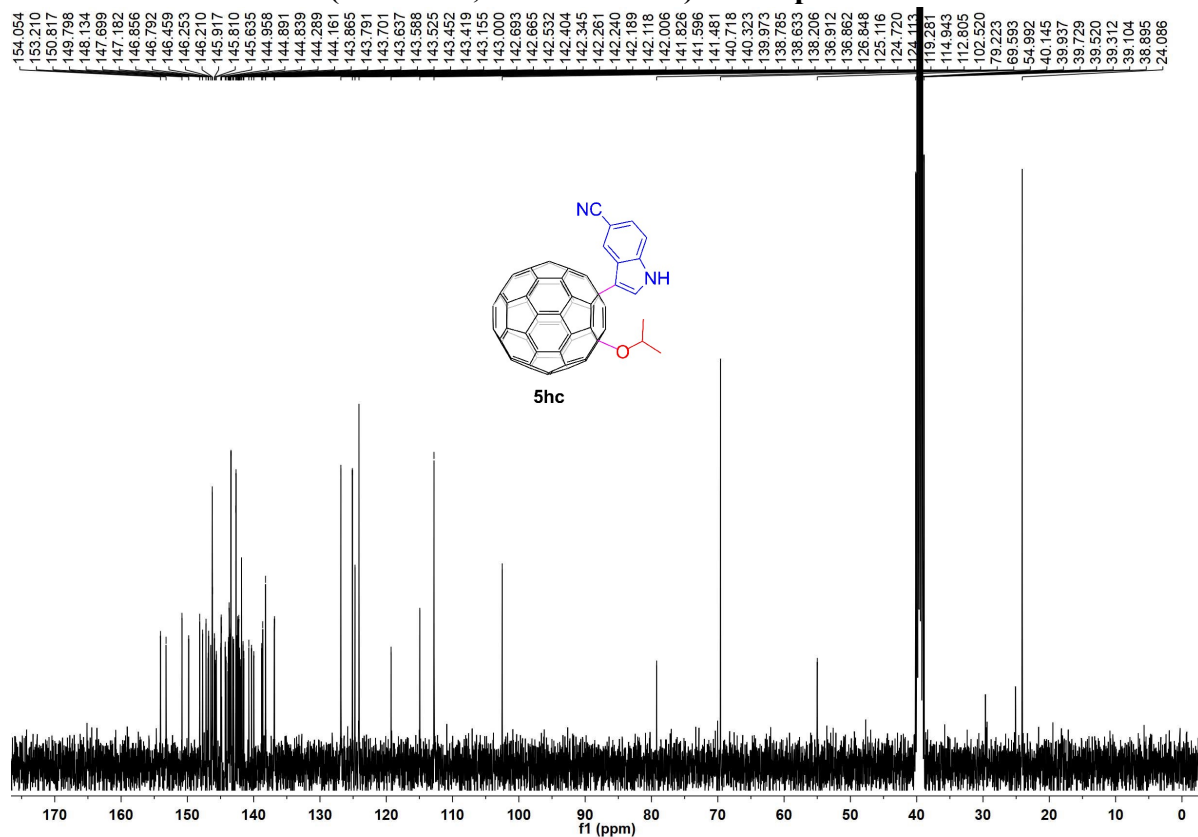



# Expanded <sup>13</sup>C NMR (100 MHz, d<sub>6</sub>-DMSO/CS<sub>2</sub>) of compound 5hc

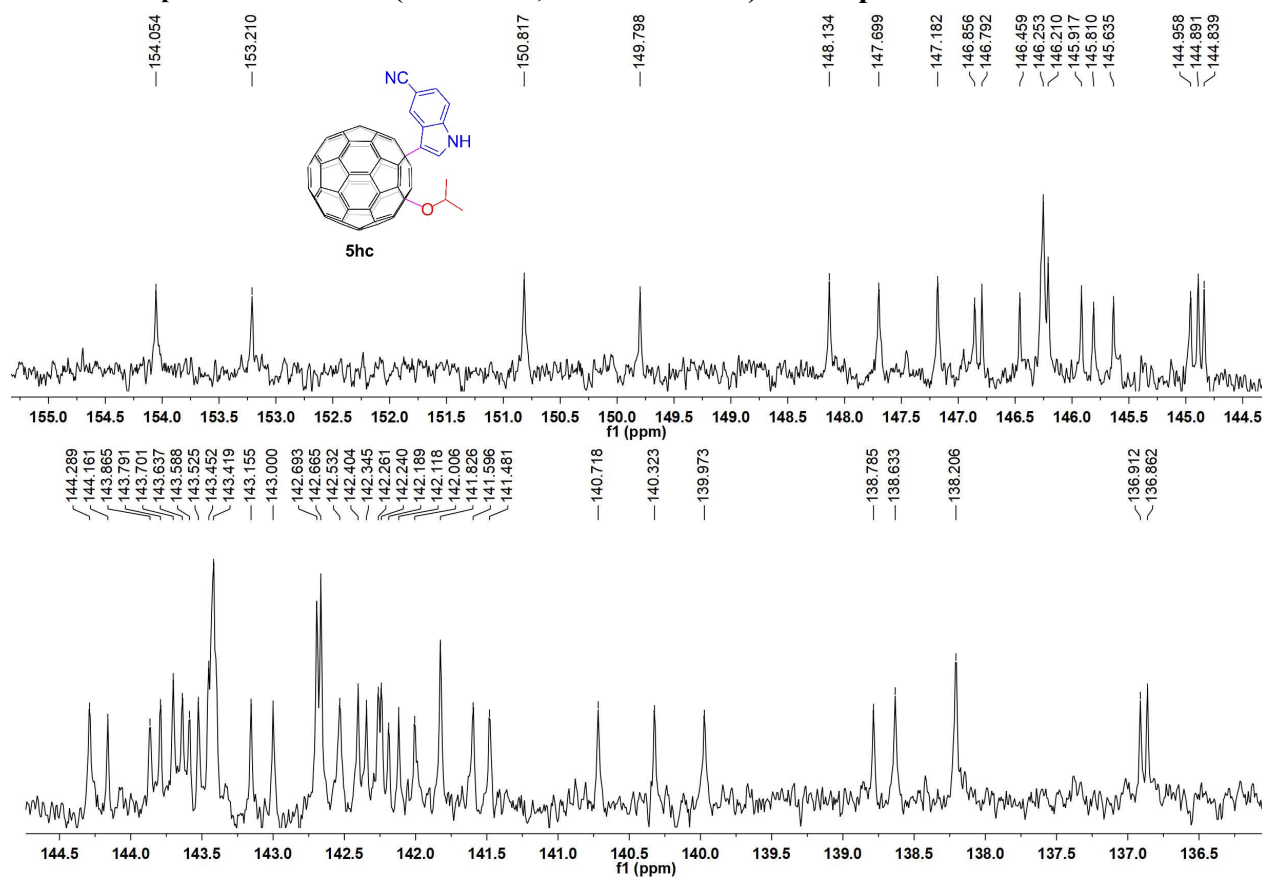

# <sup>1</sup>H NMR (400 MHz, d<sub>6</sub>-DMSO/CS<sub>2</sub>) of compound 5gc

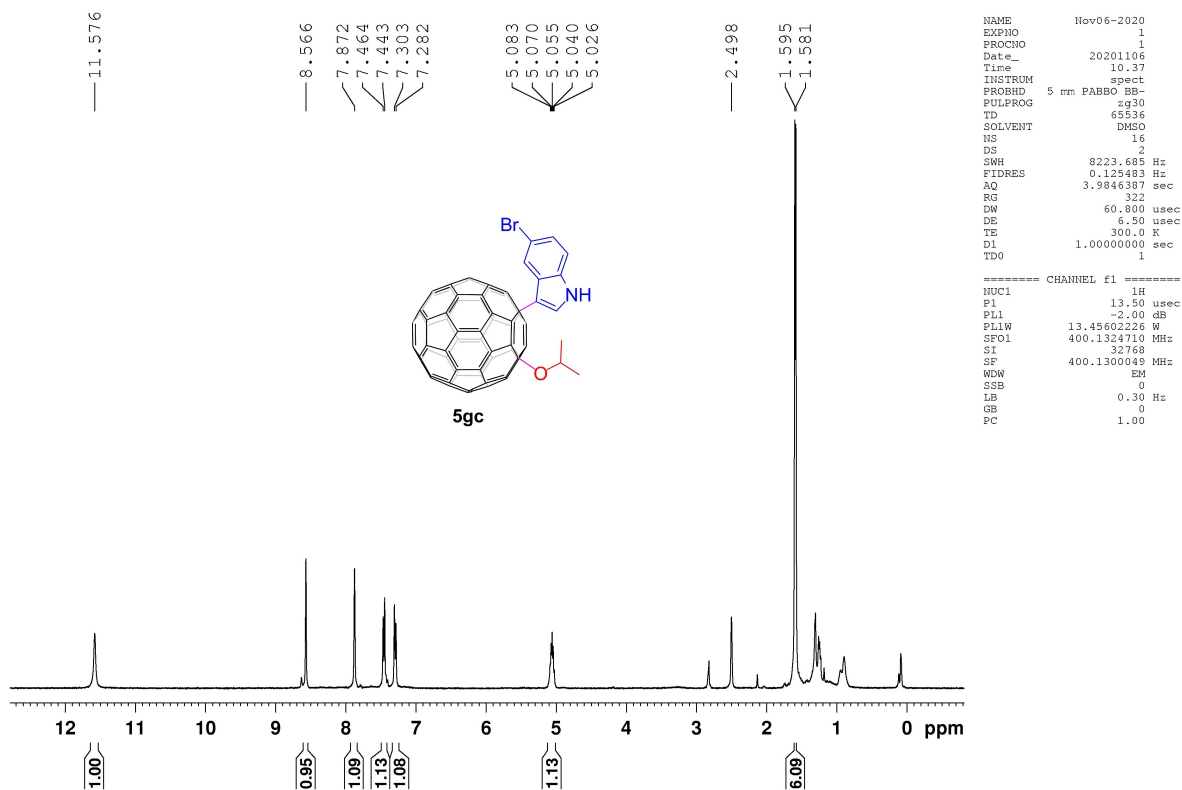

# **<sup>13</sup>C NMR (100 MHz, d<sub>6</sub>-DMSO/CS<sub>2</sub>) of compound 5gc**

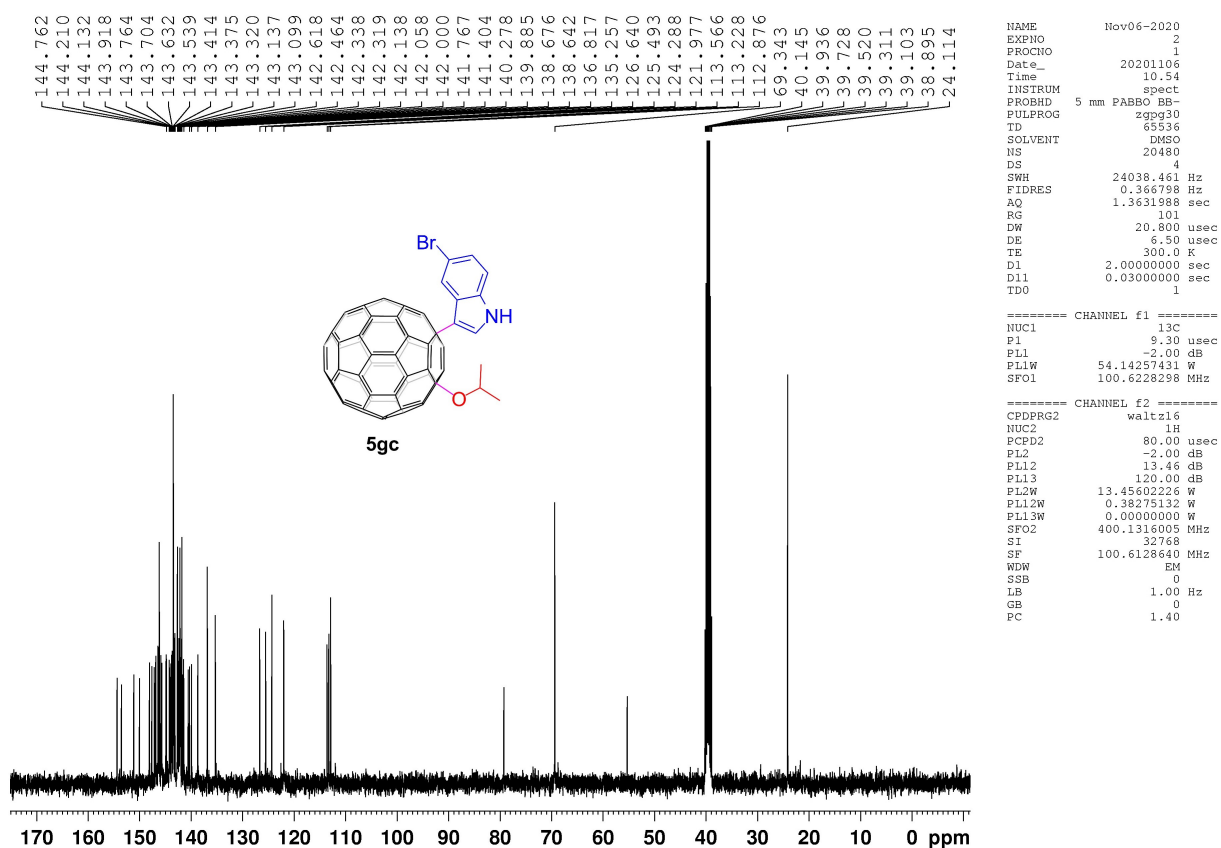

## **Expanded <sup>13</sup>C NMR (100 MHz, d<sub>6</sub>-DMSO/CS<sub>2</sub>) of compound 5gc**

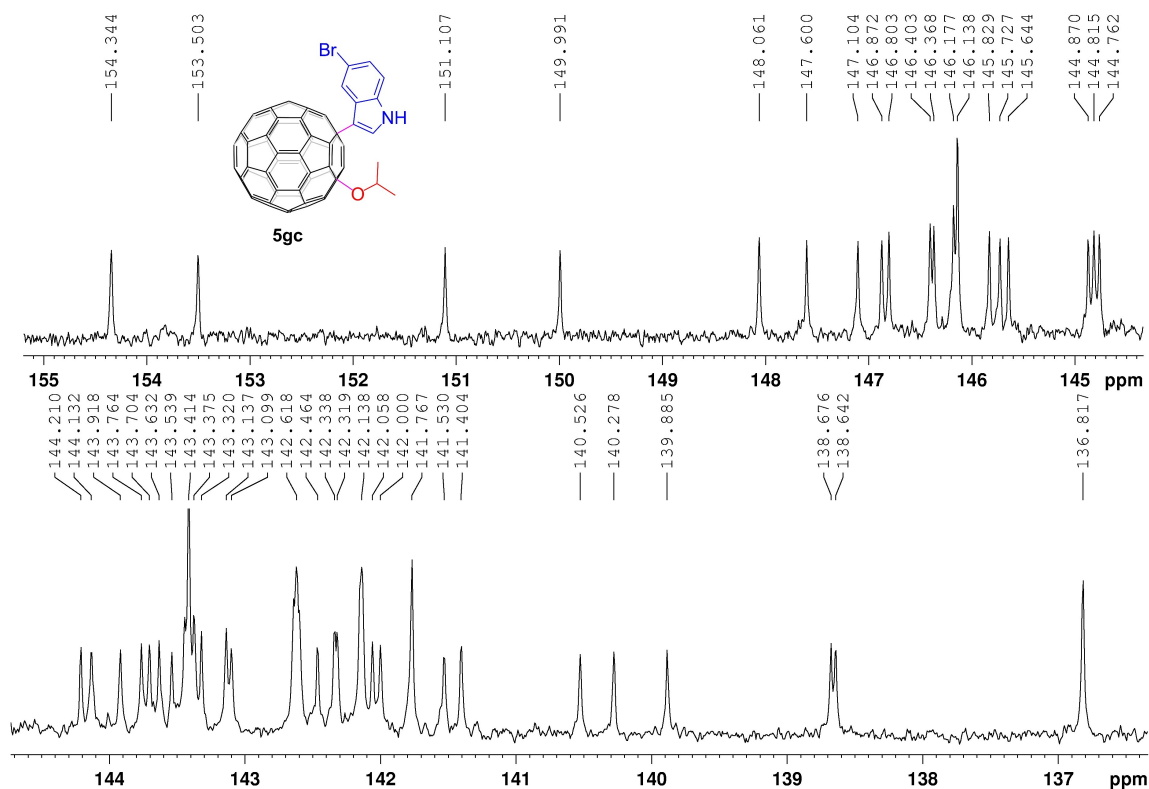

**<sup>1</sup>H NMR (400 MHz, d<sub>6</sub>-DMSO/CS<sub>2</sub>) of compound 5gd**

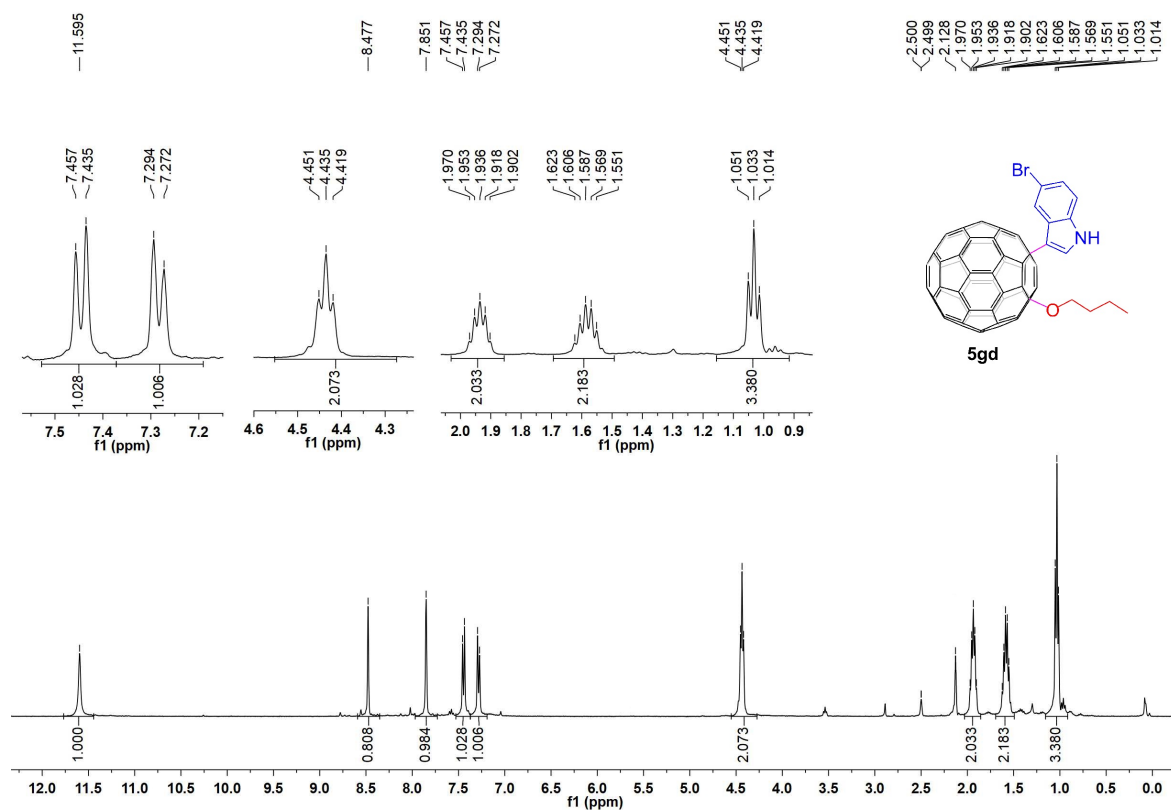

**<sup>13</sup>C NMR (100 MHz, d<sub>6</sub>-DMSO/CS<sub>2</sub>) of compound 5gd**

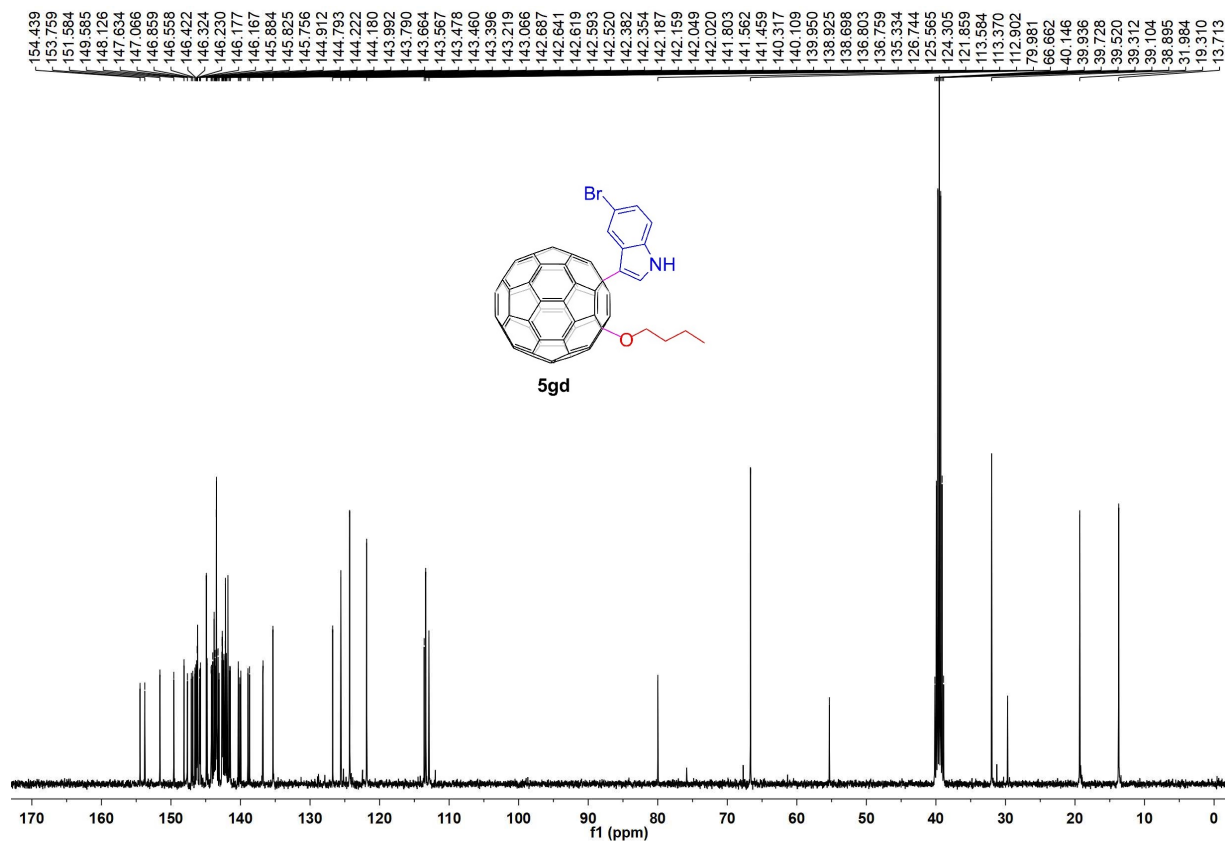

Expanded  $^{13}\text{C}$  NMR (100 MHz,  $\text{d}_6\text{-DMSO}/\text{CS}_2$ ) of compound **5gd**

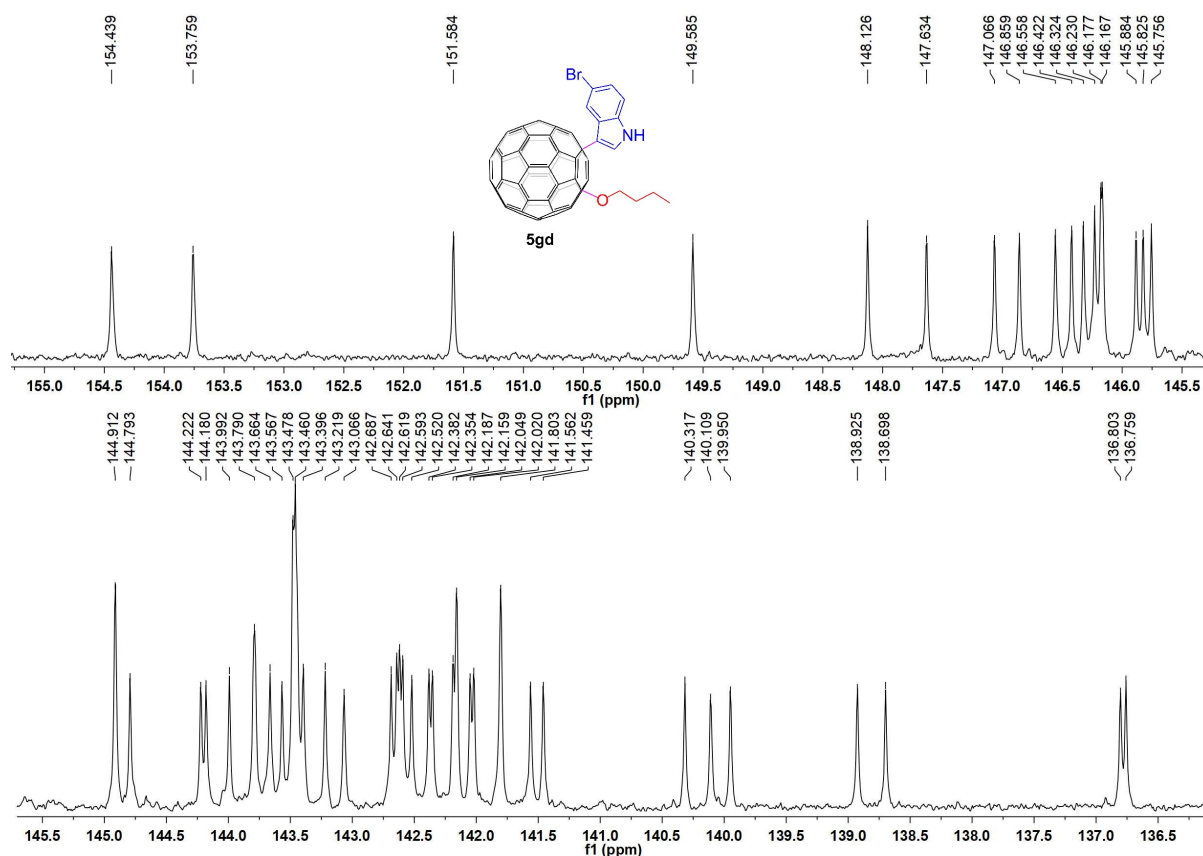

$^1\text{H}$  NMR (400 MHz,  $\text{d}_6\text{-DMSO}/\text{CS}_2$ ) of compound **5hd**

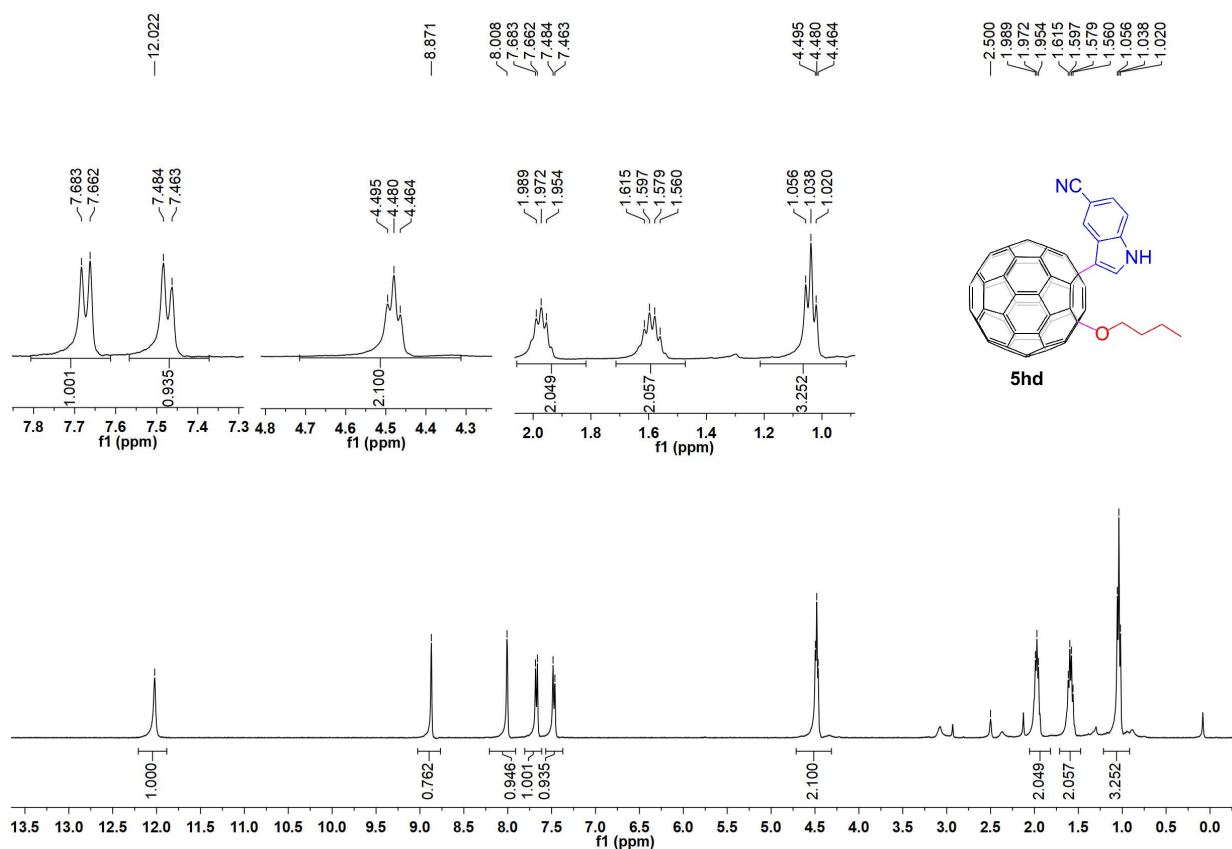

**$^{13}\text{C}$  NMR (100 MHz,  $d_6$ -DMSO/ $\text{CS}_2$ ) of compound 5hd**

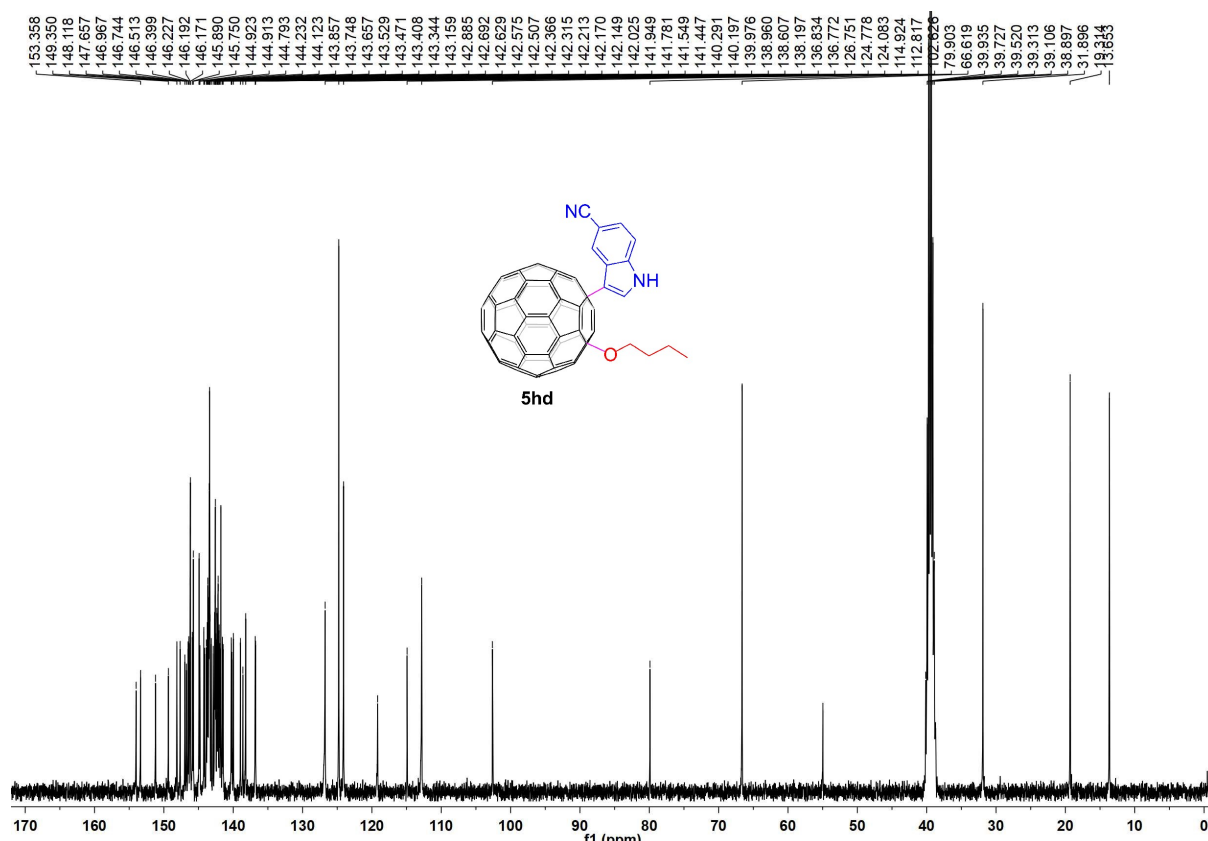

**Expanded  $^{13}\text{C}$  NMR (100 MHz,  $d_6$ -DMSO/ $\text{CS}_2$ ) of compound 5hd**

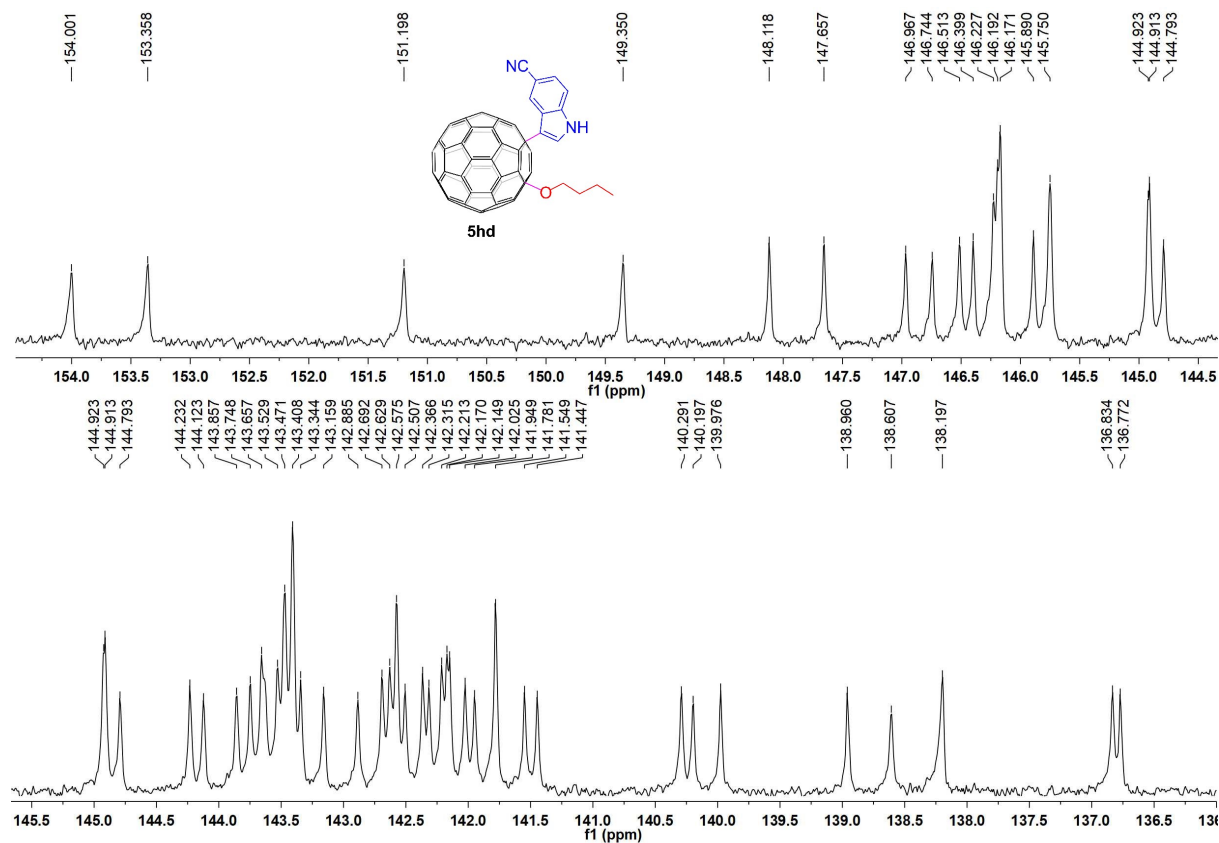

**<sup>1</sup>H NMR (400 MHz, d<sub>6</sub>-DMSO/CS<sub>2</sub>) of compound 5id**

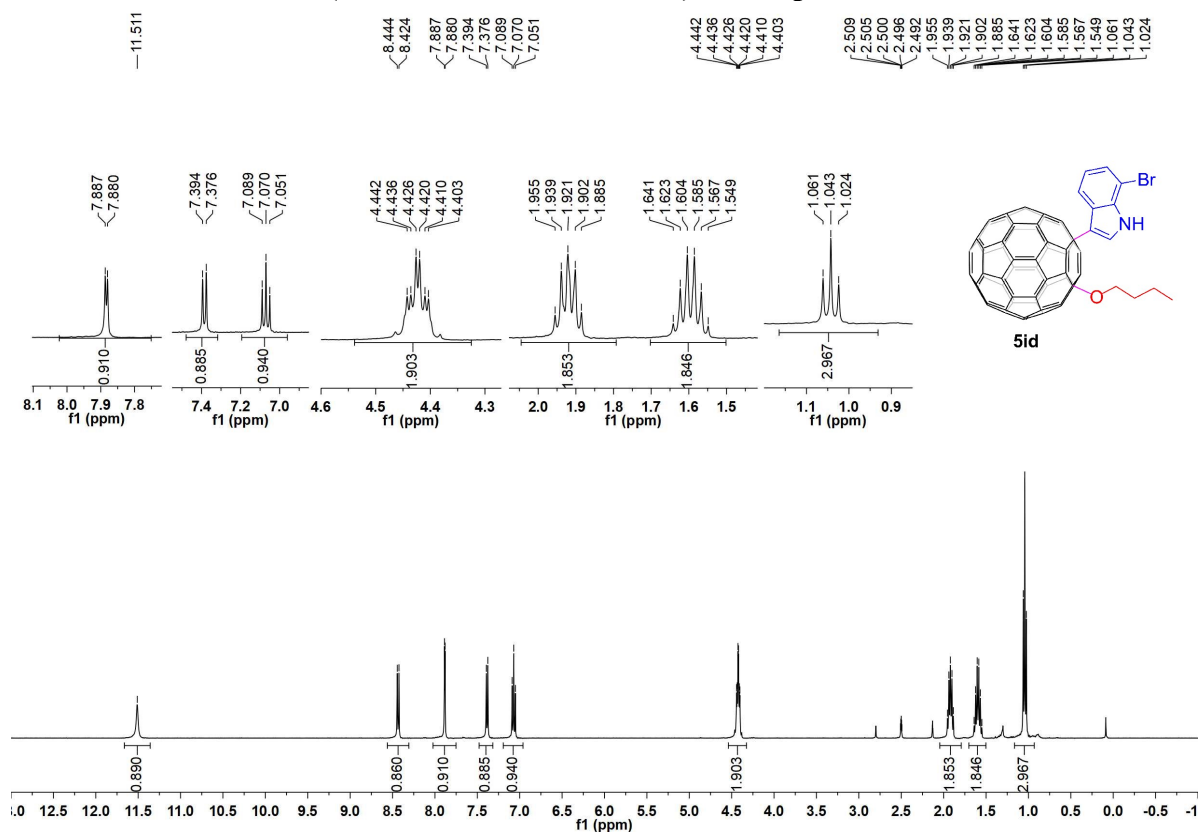

**<sup>13</sup>C NMR (100 MHz, d<sub>6</sub>-DMSO/CS<sub>2</sub>) of compound 5id**

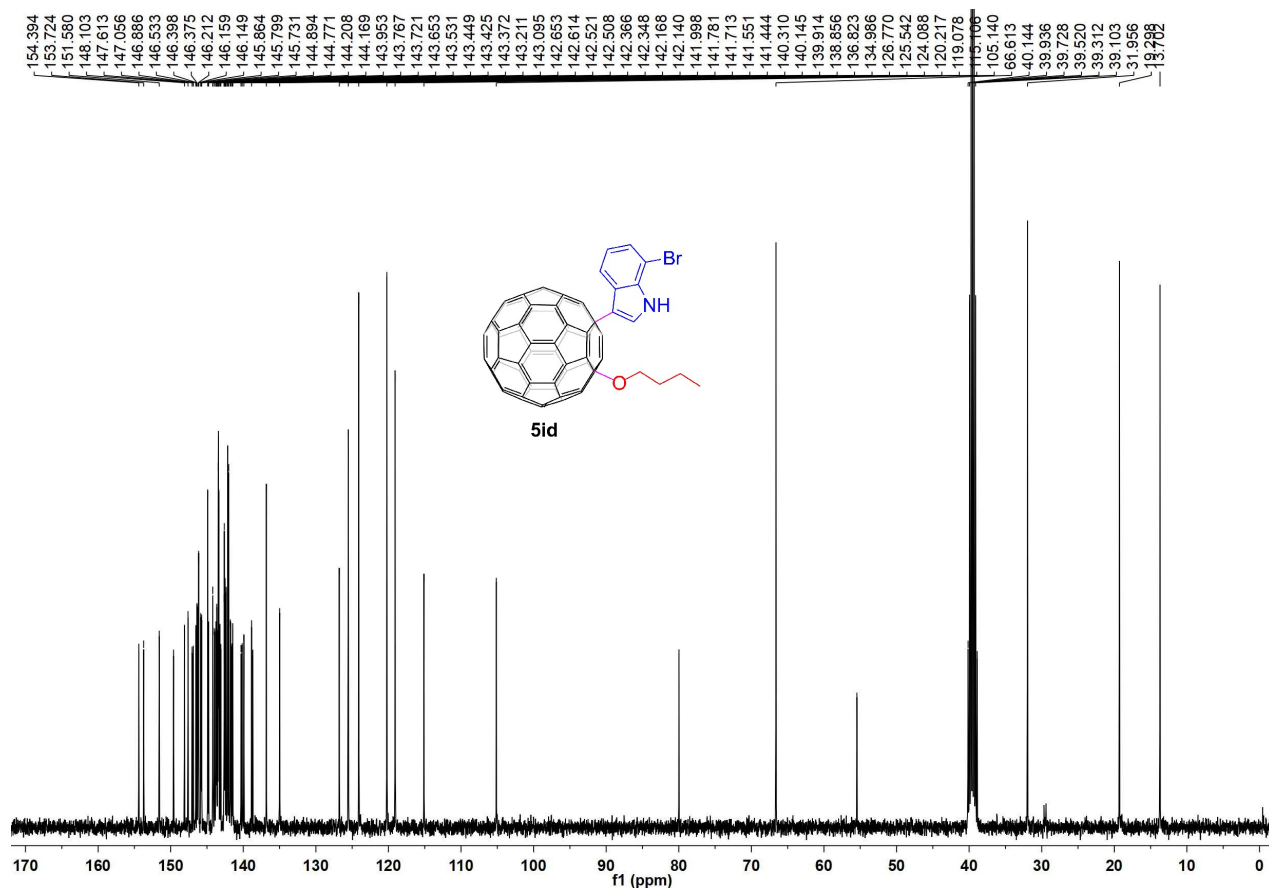



# Expanded $^{13}\text{C}$ NMR (100 MHz, $d_6$ -DMSO/ $\text{CS}_2$ ) of compound 5Id

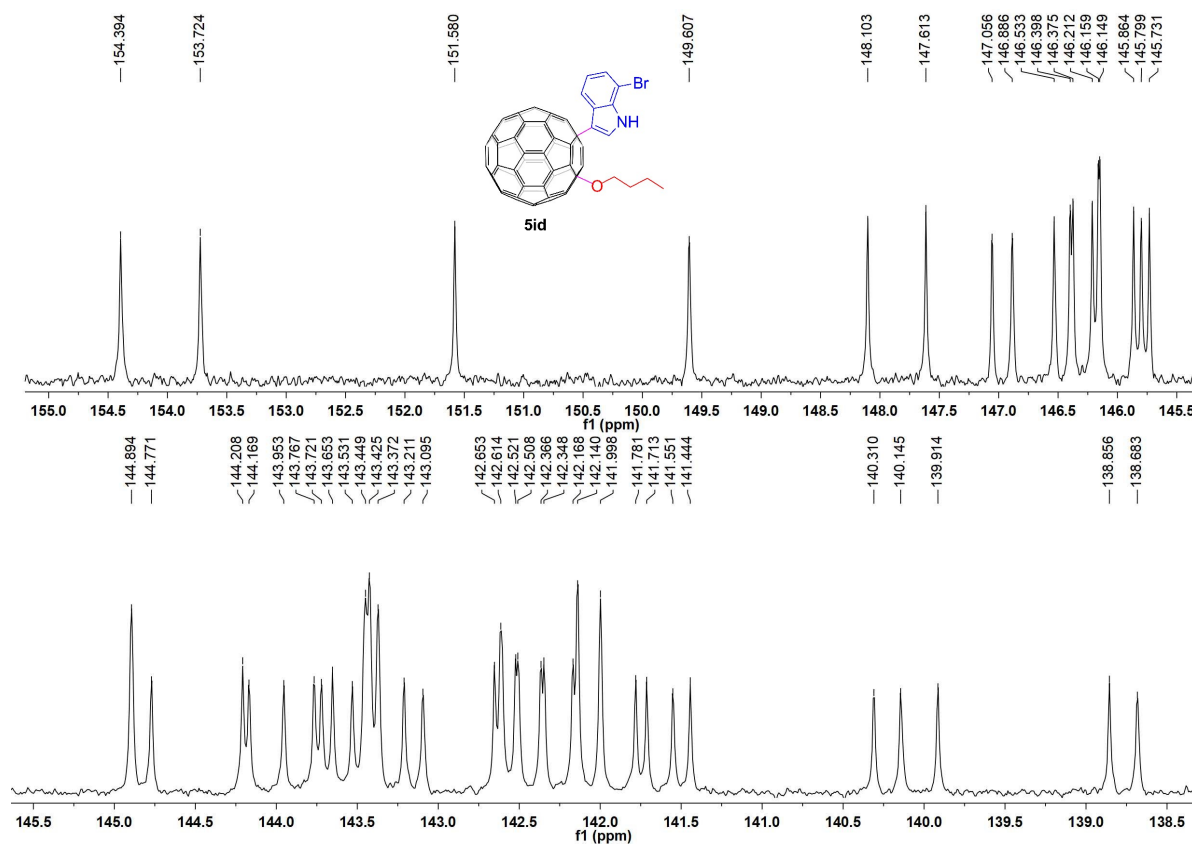

## $^1\text{H}$ NMR (400 MHz, $d_6$ -DMSO/ $\text{CS}_2$ ) of compound 5Id

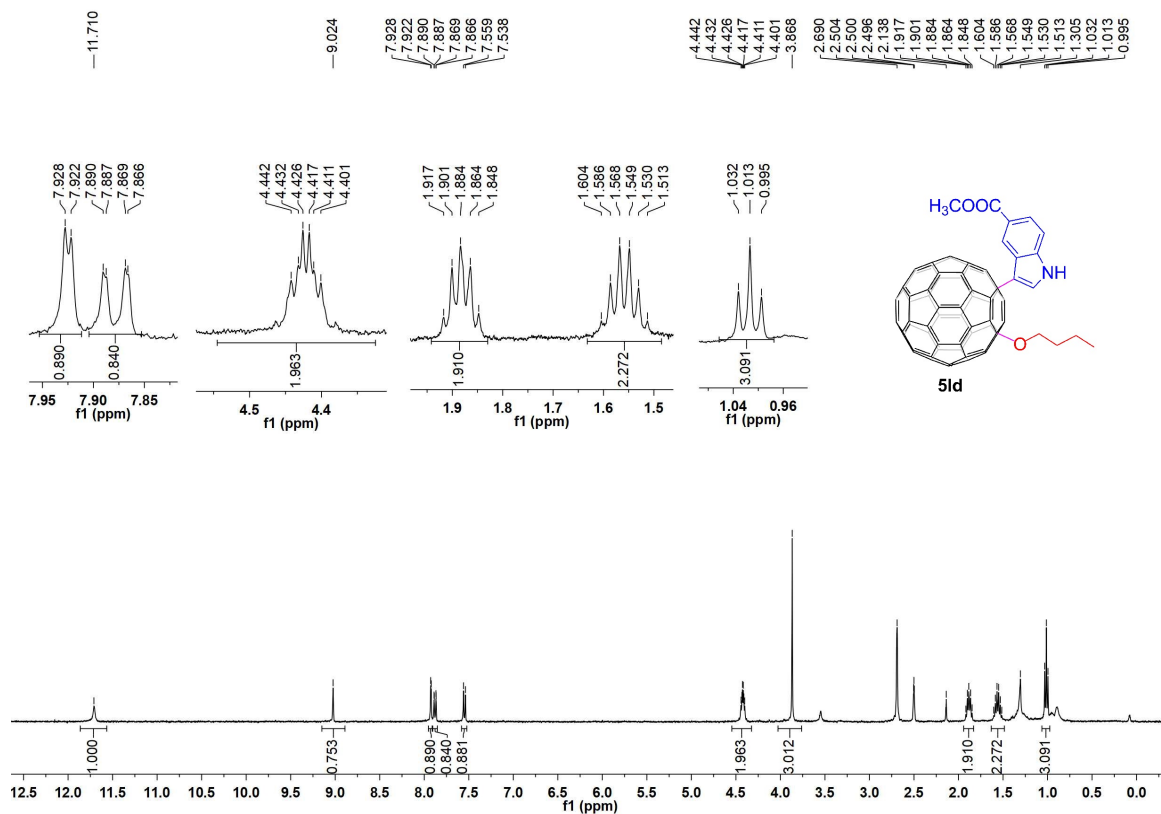



**$^{13}\text{C}$  NMR (100 MHz,  $\text{d}_6\text{-DMSO}/\text{CS}_2$ ) of compound 5ld**

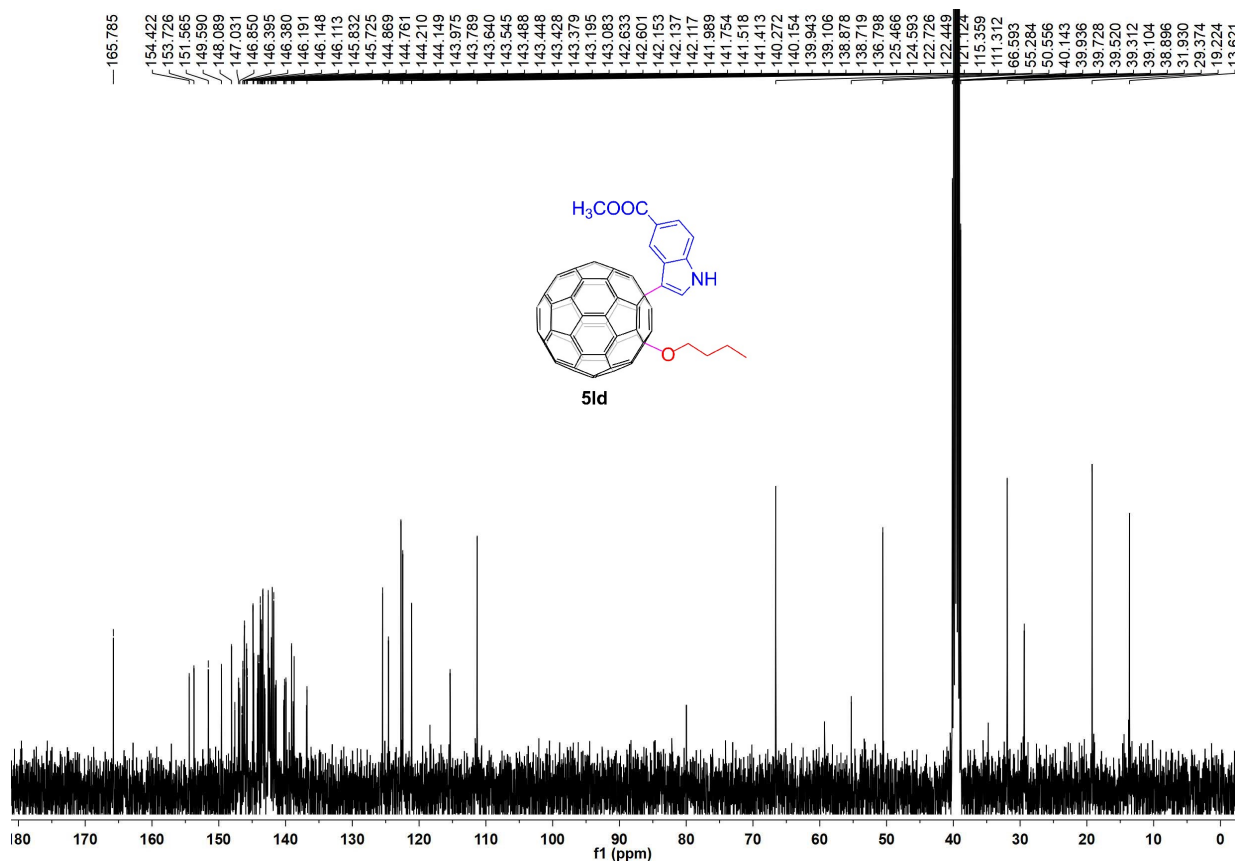

**Expanded  $^{13}\text{C}$  NMR (100 MHz,  $\text{d}_6\text{-DMSO}/\text{CS}_2$ ) of compound 5ld**

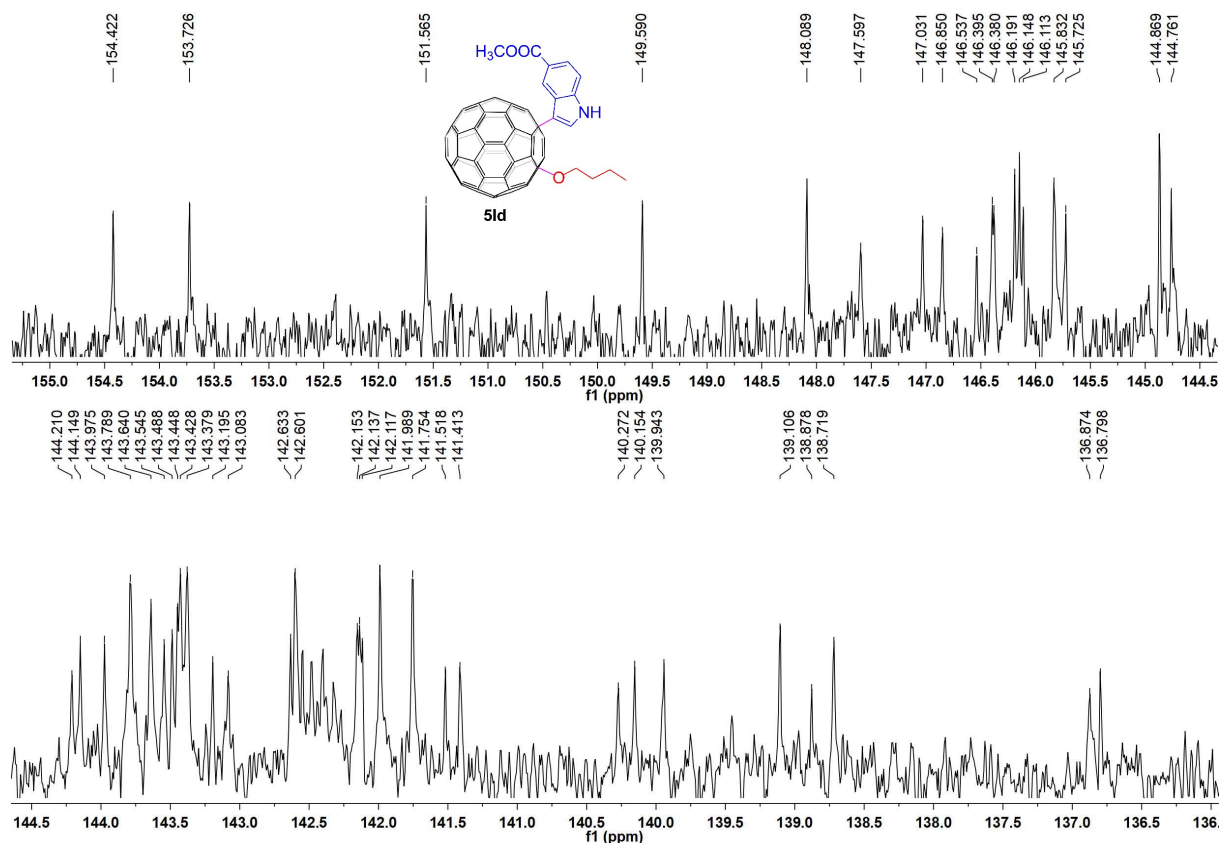

**<sup>1</sup>H NMR (400 MHz, d<sub>6</sub>-DMSO/CS<sub>2</sub>) of compound 5ae**

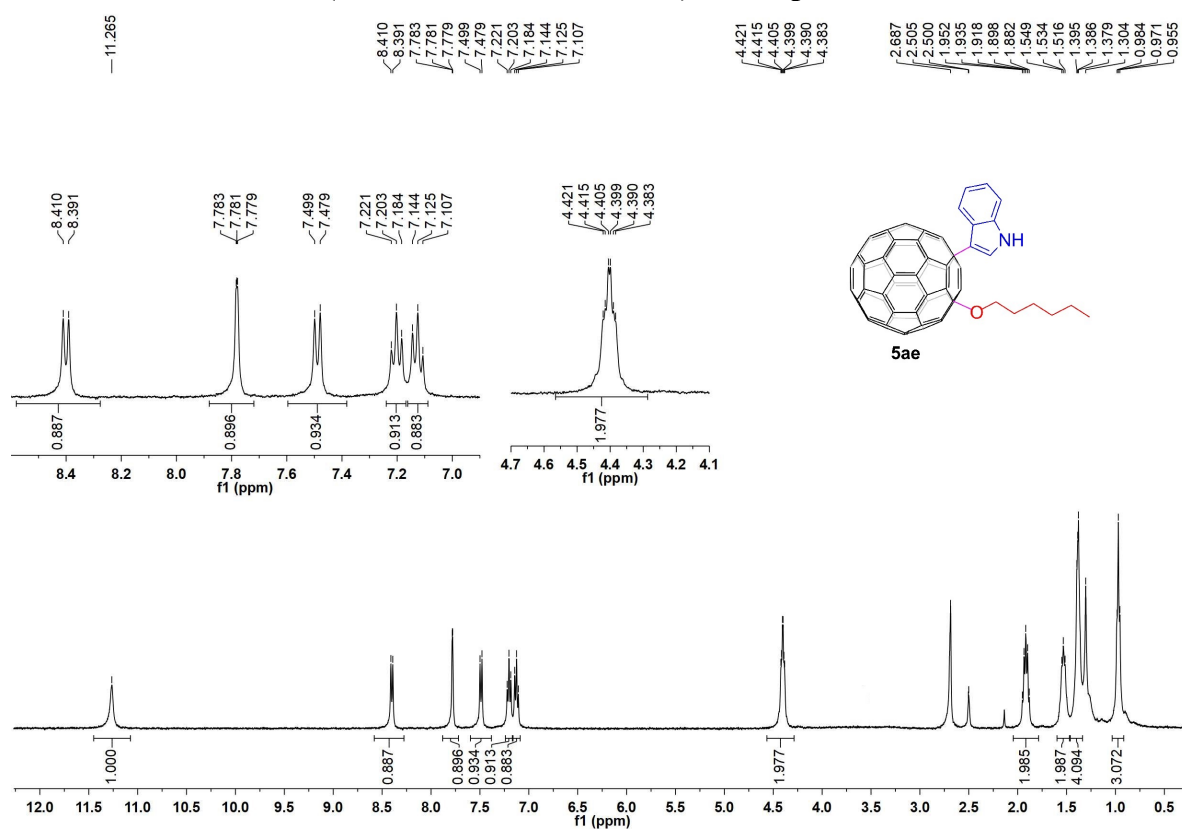

**<sup>13</sup>C NMR (100 MHz, d<sub>6</sub>-DMSO/CS<sub>2</sub>) of compound 5ae**

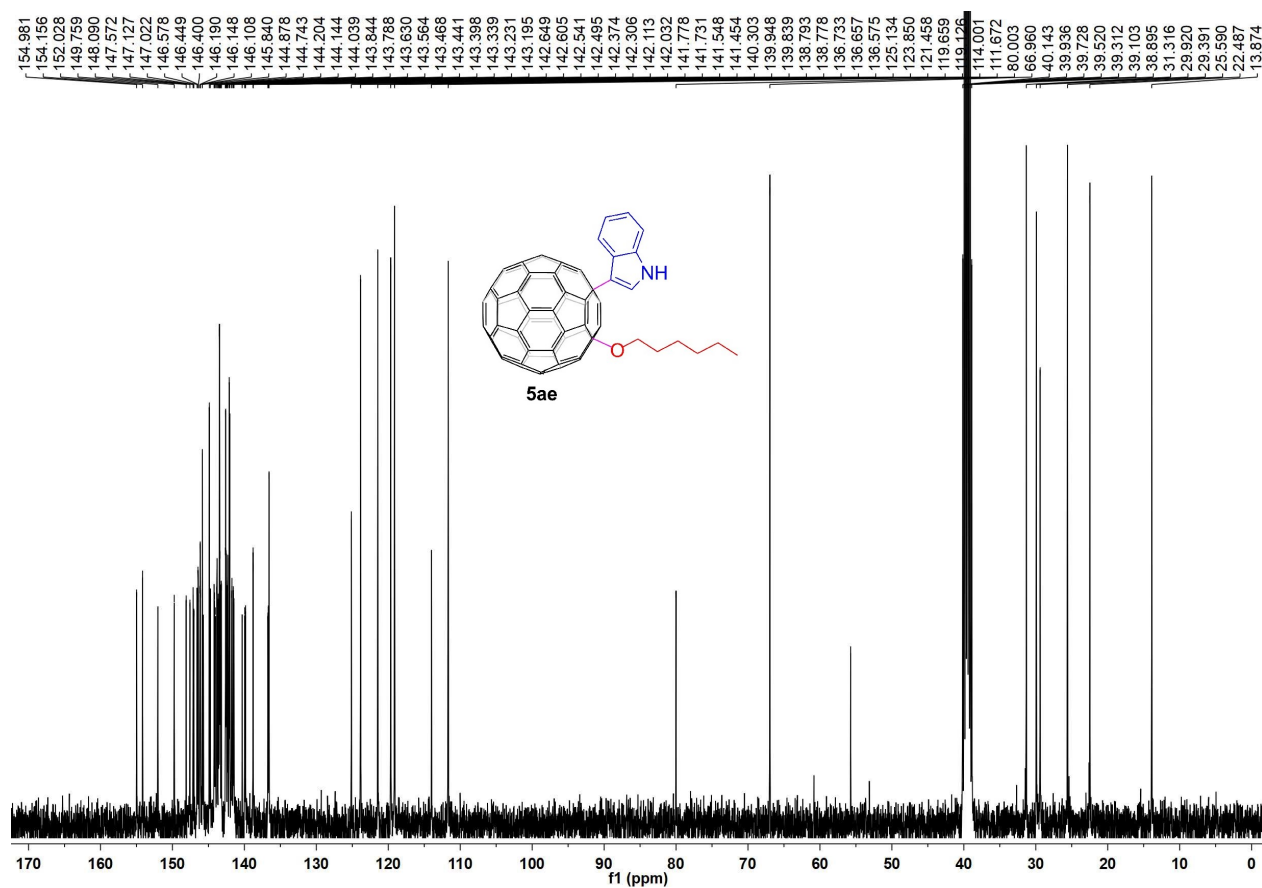

# Expanded $^{13}\text{C}$ NMR (100 MHz, $\text{d}_6\text{-DMSO}/\text{CS}_2$ ) of compound 5ae

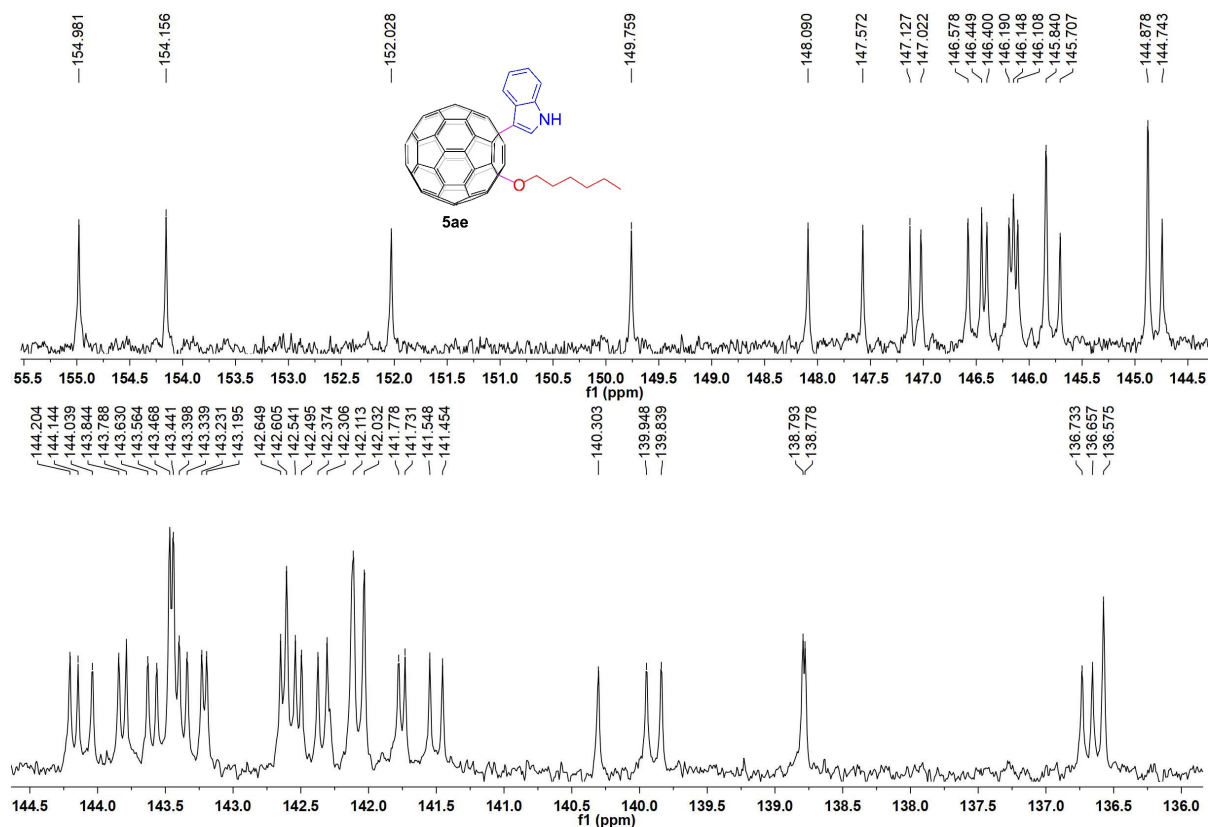

# $^1\text{H}$ NMR (400 MHz, $\text{d}_6\text{-DMSO}/\text{CS}_2$ ) of compound 5ge

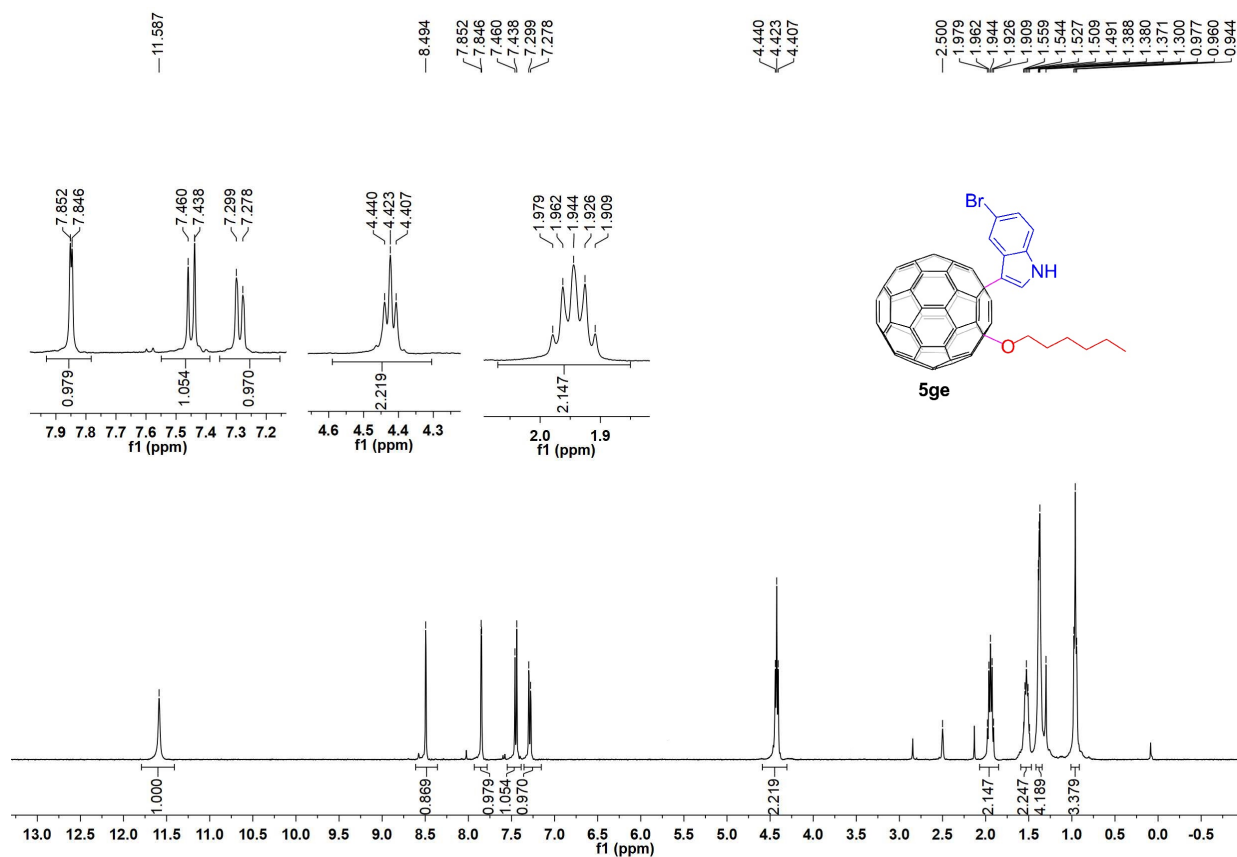

**$^{13}\text{C}$  NMR (100 MHz,  $\text{d}_6\text{-DMSO}/\text{CS}_2$ ) of compound 5ge**

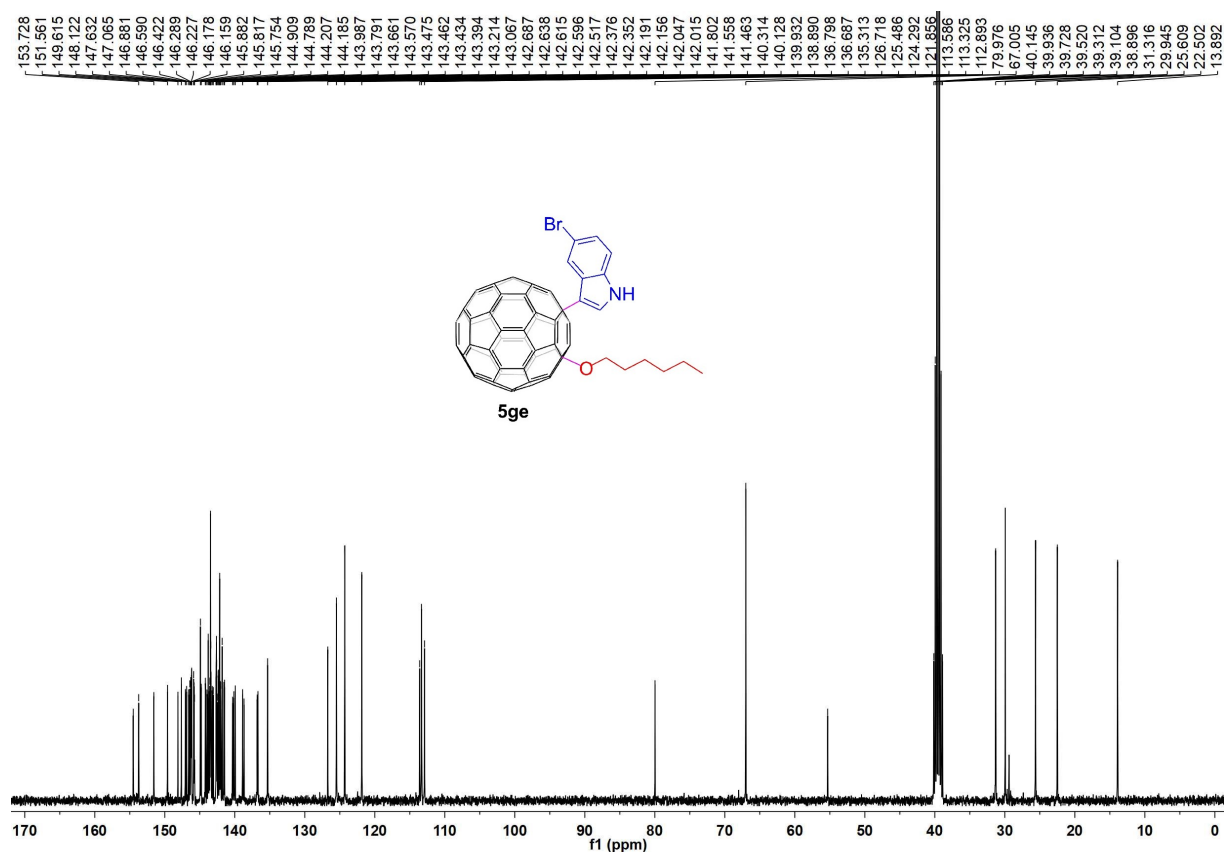

**Expanded  $^{13}\text{C}$  NMR (100 MHz,  $\text{d}_6\text{-DMSO}/\text{CS}_2$ ) of compound 5ge**

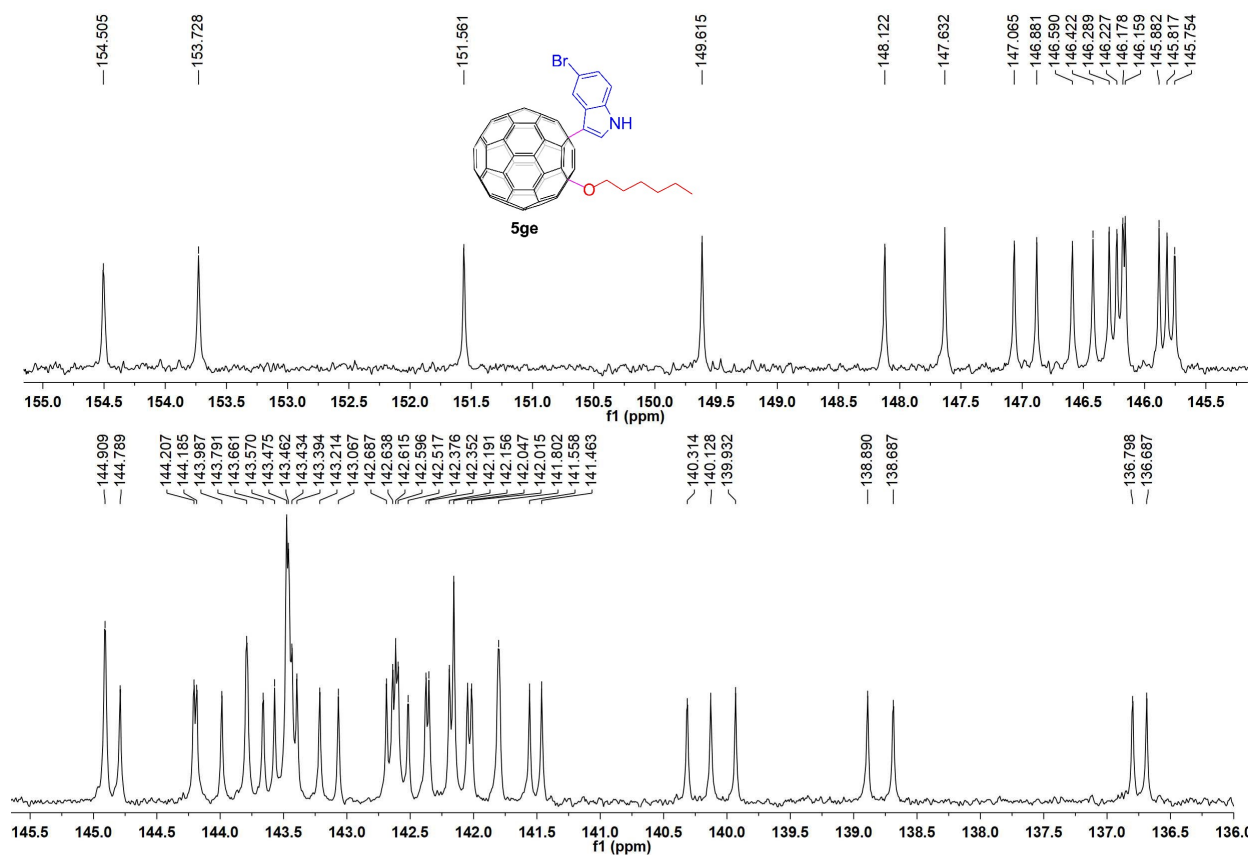

**$^1\text{H}$  NMR (400 MHz,  $\text{d}_6\text{-DMSO}/\text{CS}_2$ ) of compound 5he**

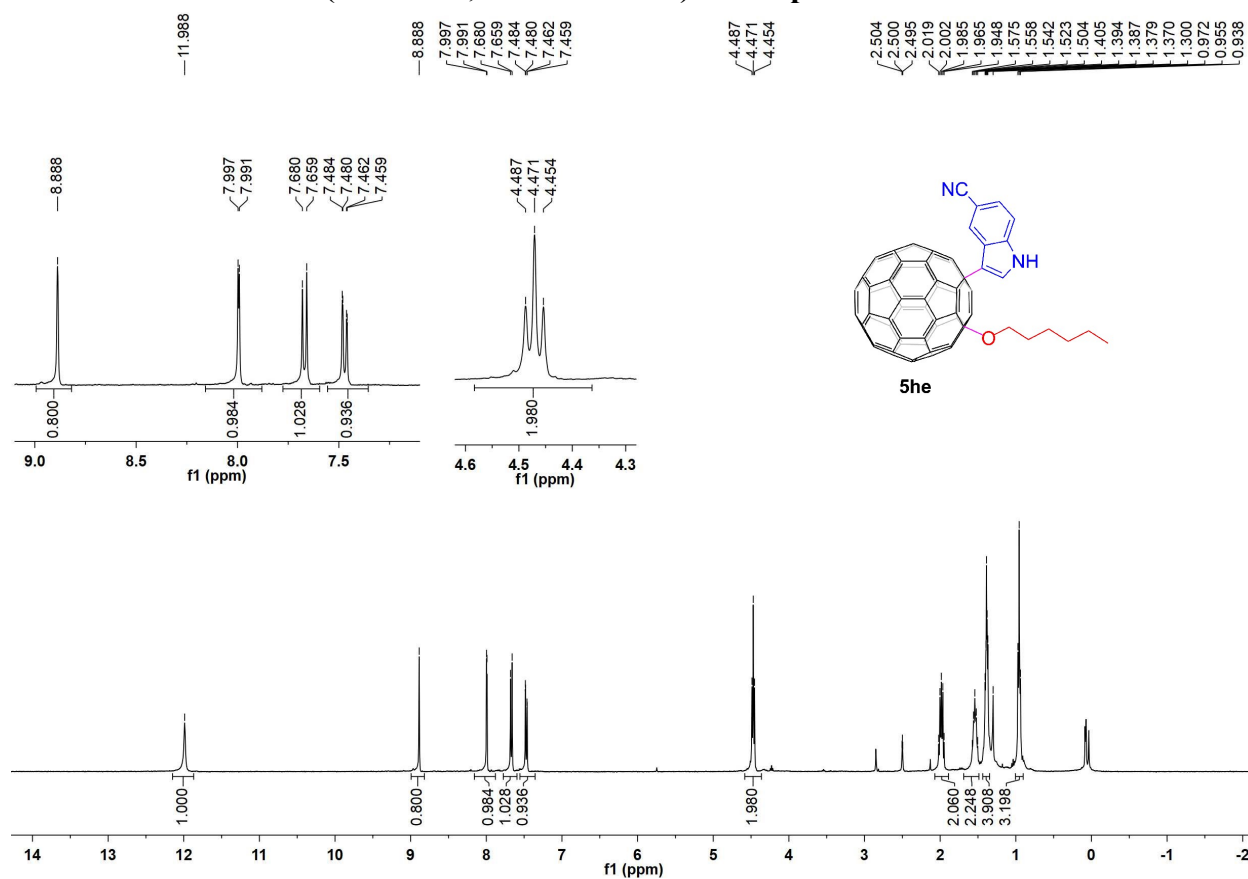

**$^{13}\text{C}$  NMR (100 MHz,  $\text{d}_6\text{-DMSO}/\text{CS}_2$ ) of compound 5he**

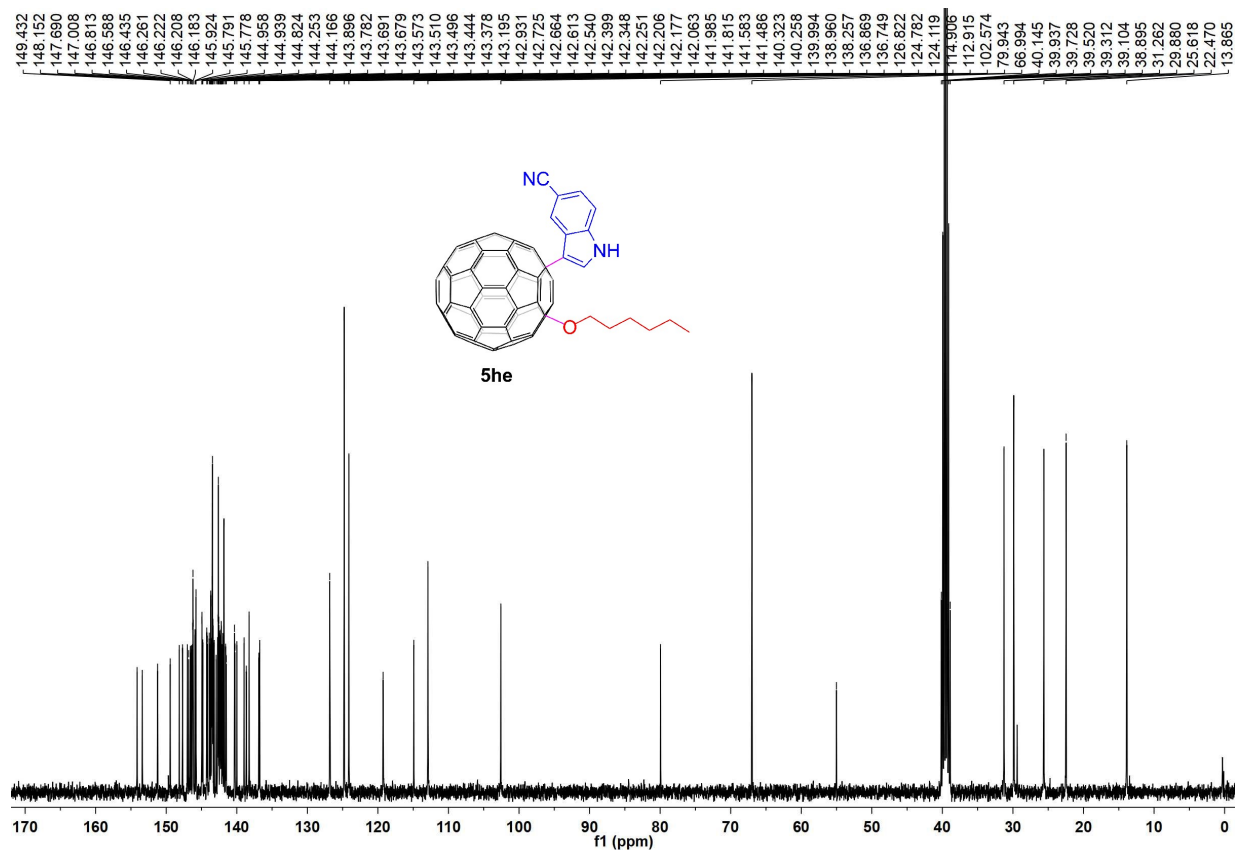

### Expanded $^{13}\text{C}$ NMR (100 MHz, $\text{d}_6\text{-DMSO}/\text{CS}_2$ ) of compound 5he

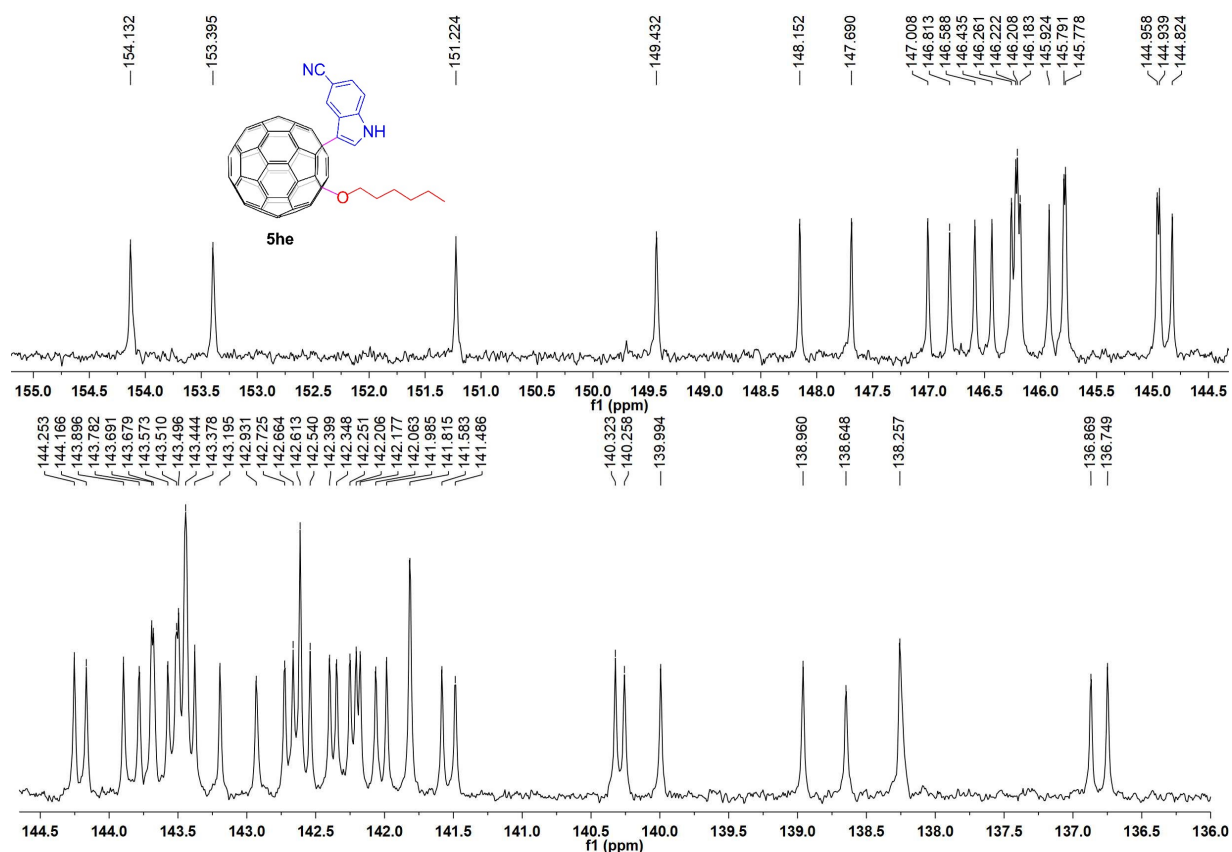

### $^1\text{H}$ NMR (400 MHz, $\text{d}_6\text{-DMSO}/\text{CS}_2$ ) of compound 5ie

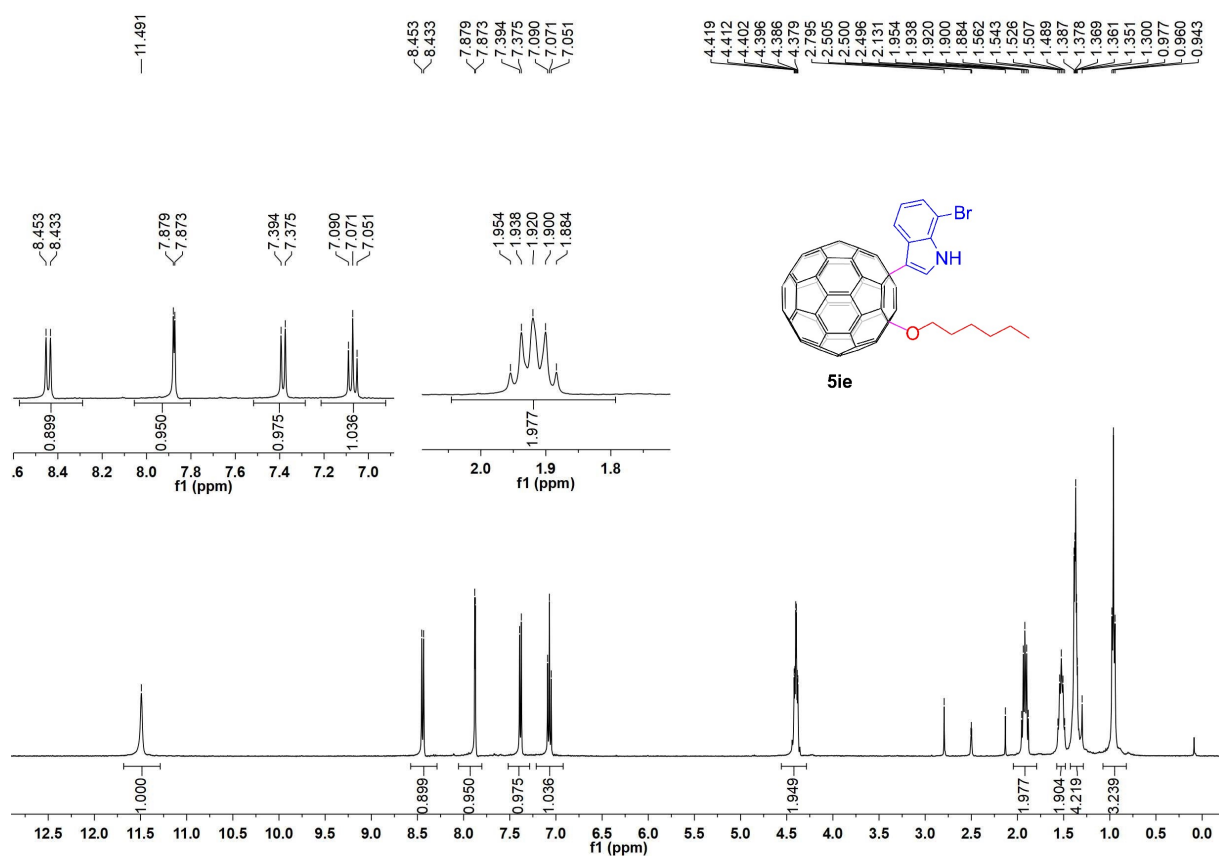



**$^{13}\text{C}$  NMR (100 MHz,  $\text{d}_6\text{-DMSO}/\text{CS}_2$ ) of compound 5ie**

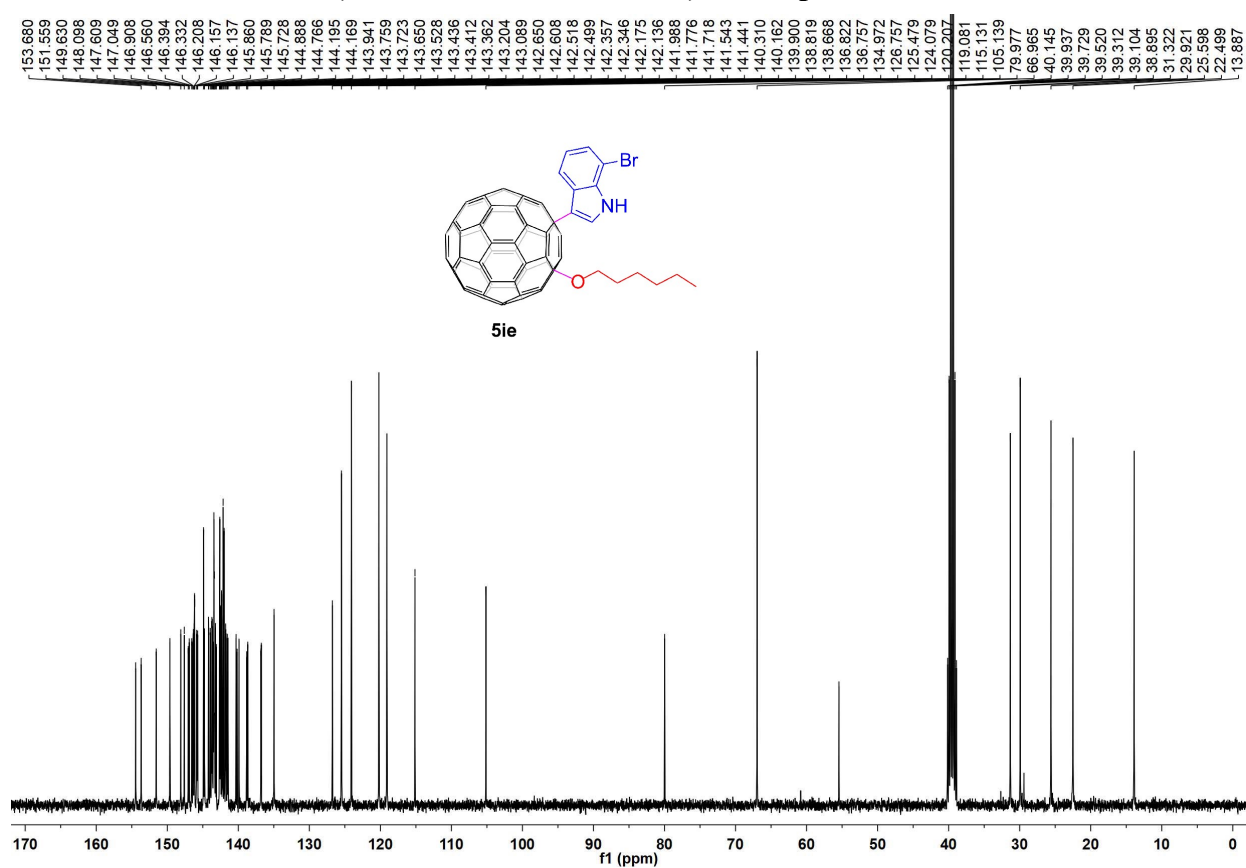

**Expanded  $^{13}\text{C}$  NMR (100 MHz,  $\text{d}_6\text{-DMSO}/\text{CS}_2$ ) of compound 5ie**

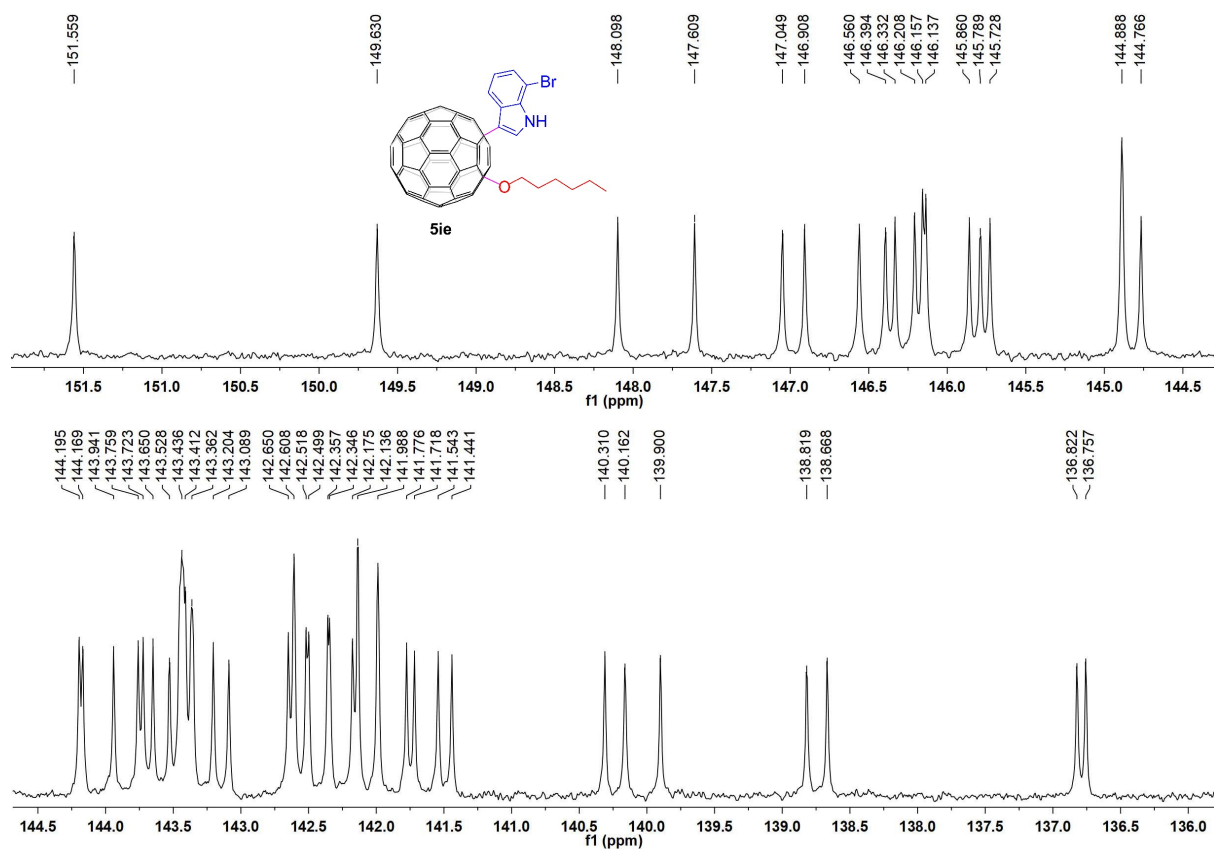



**<sup>1</sup>H NMR (400 MHz , d<sub>6</sub>-DMSO/CS<sub>2</sub>) of compound 5le**

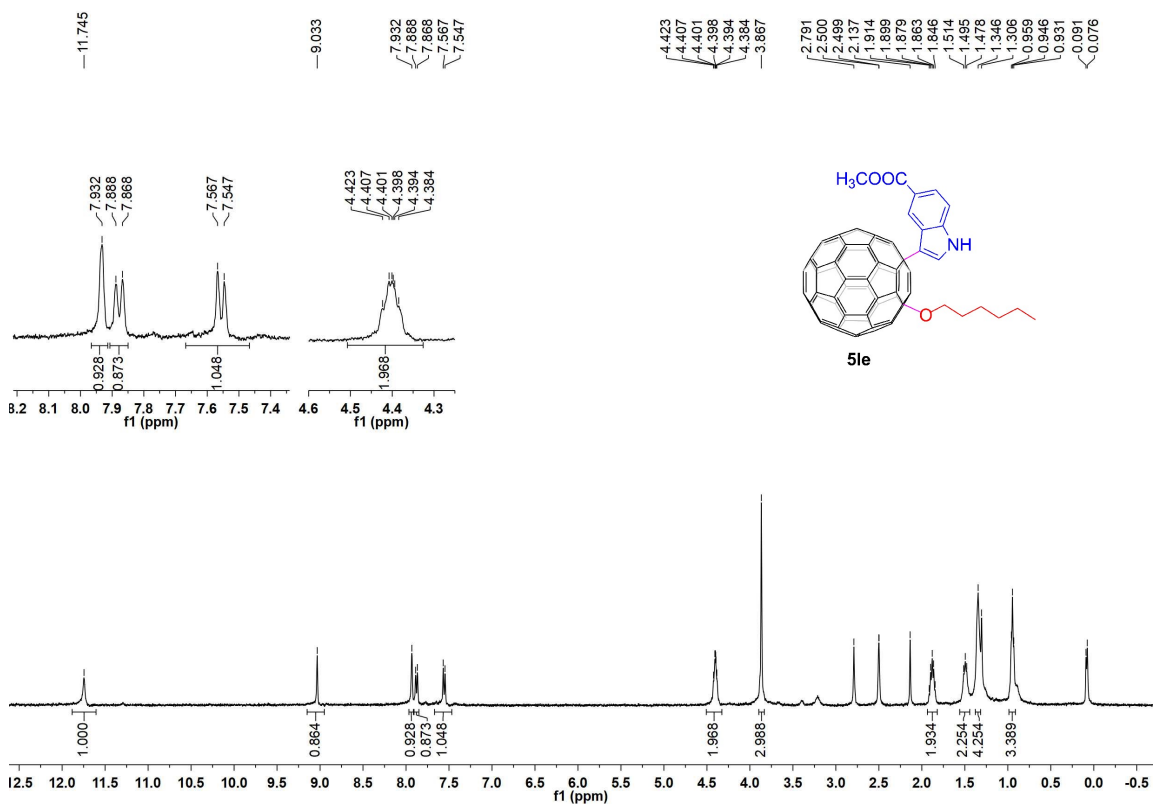

**<sup>13</sup>C NMR (100 MHz , d<sub>6</sub>-DMSO/CS<sub>2</sub>) of compound 5le**

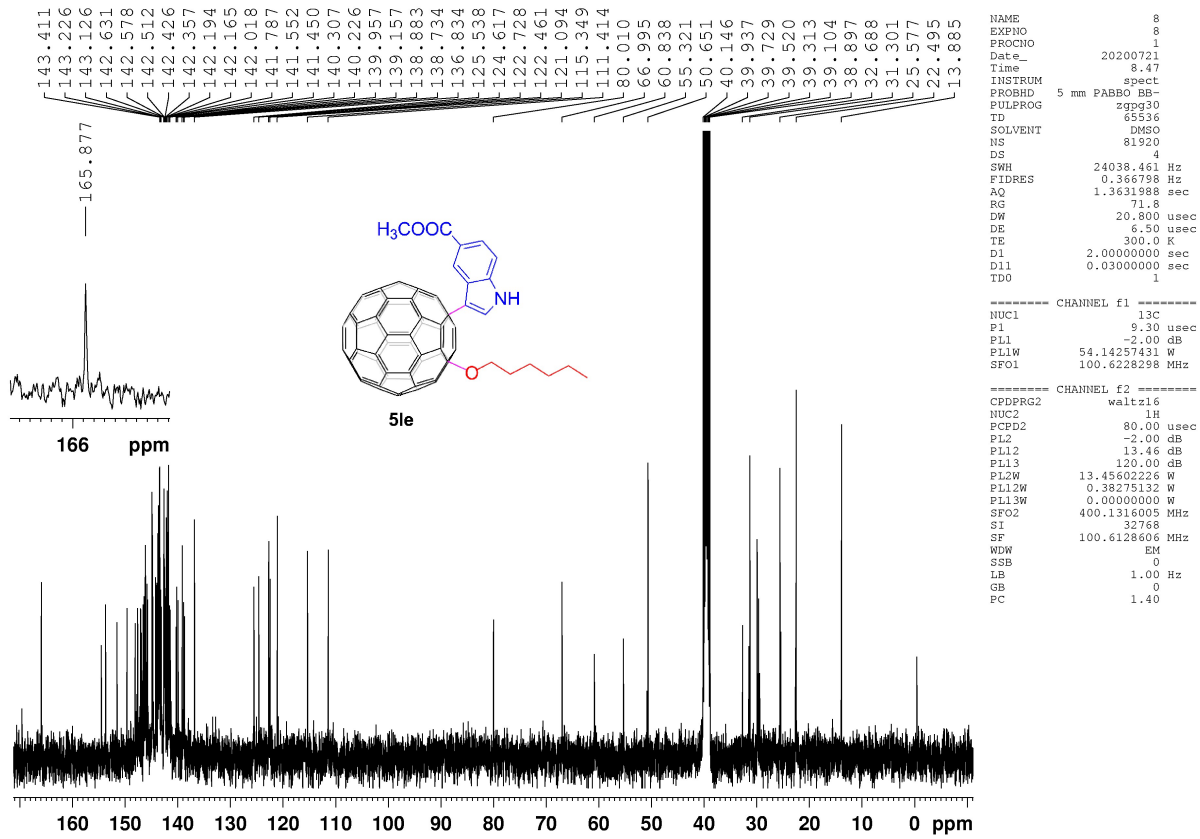

### Expanded $^{13}\text{C}$ NMR (100 MHz, $\text{d}_6\text{-DMSO}/\text{CS}_2$ ) of compound 5le

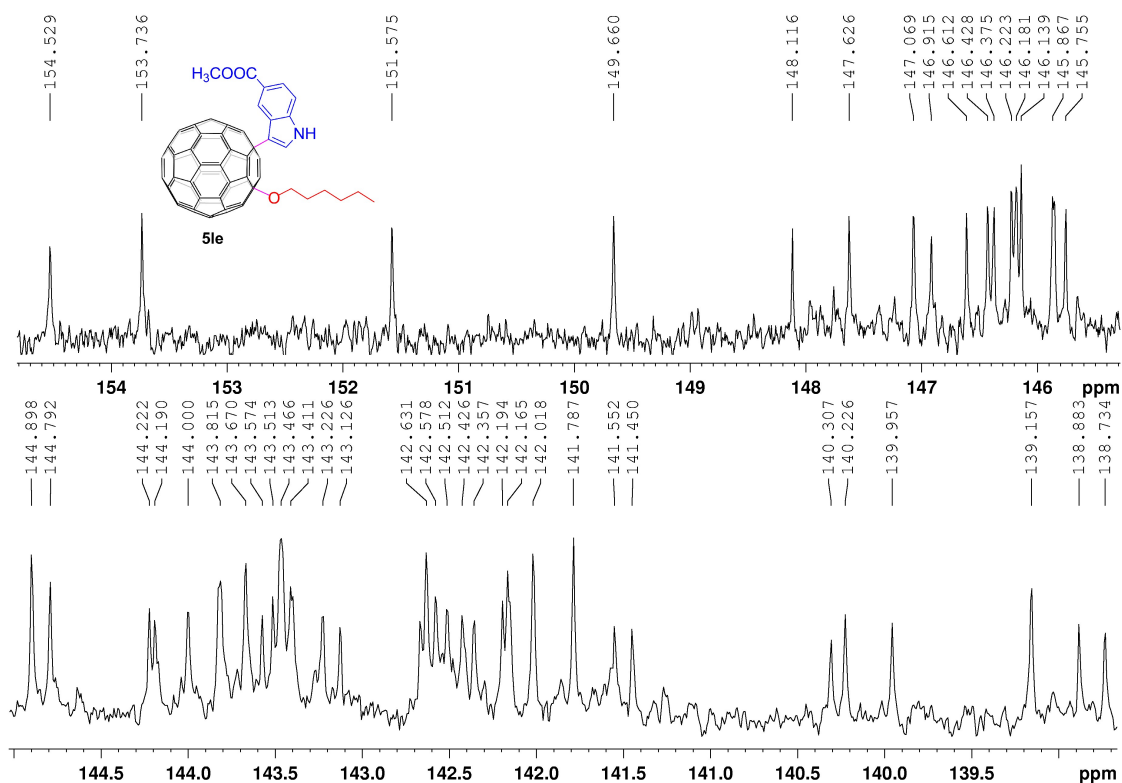

### $^1\text{H}$ NMR (400 MHz, $\text{Acetone-}d_6/\text{CS}_2$ ) of compound 5gi

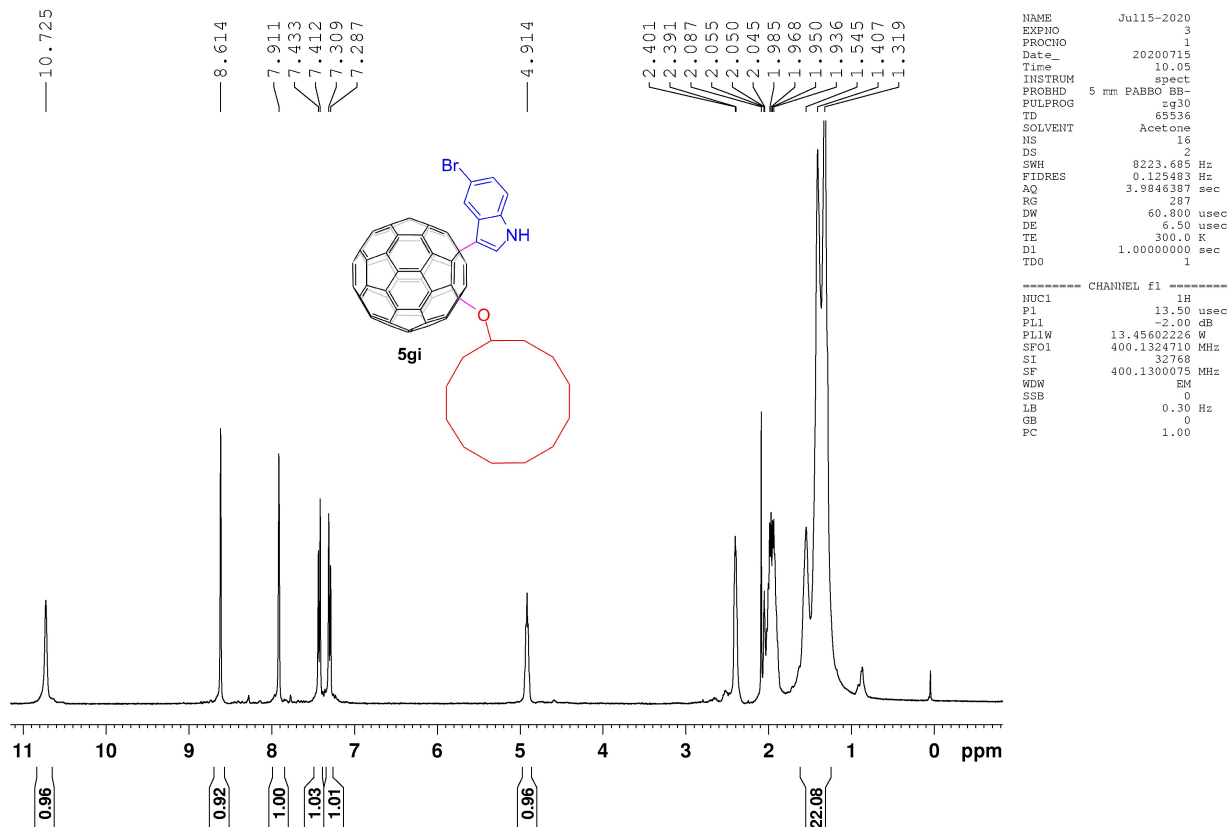

# **<sup>13</sup>C NMR (100 MHz, d<sub>6</sub>-DMSO/CS<sub>2</sub>) of compound 5gi**

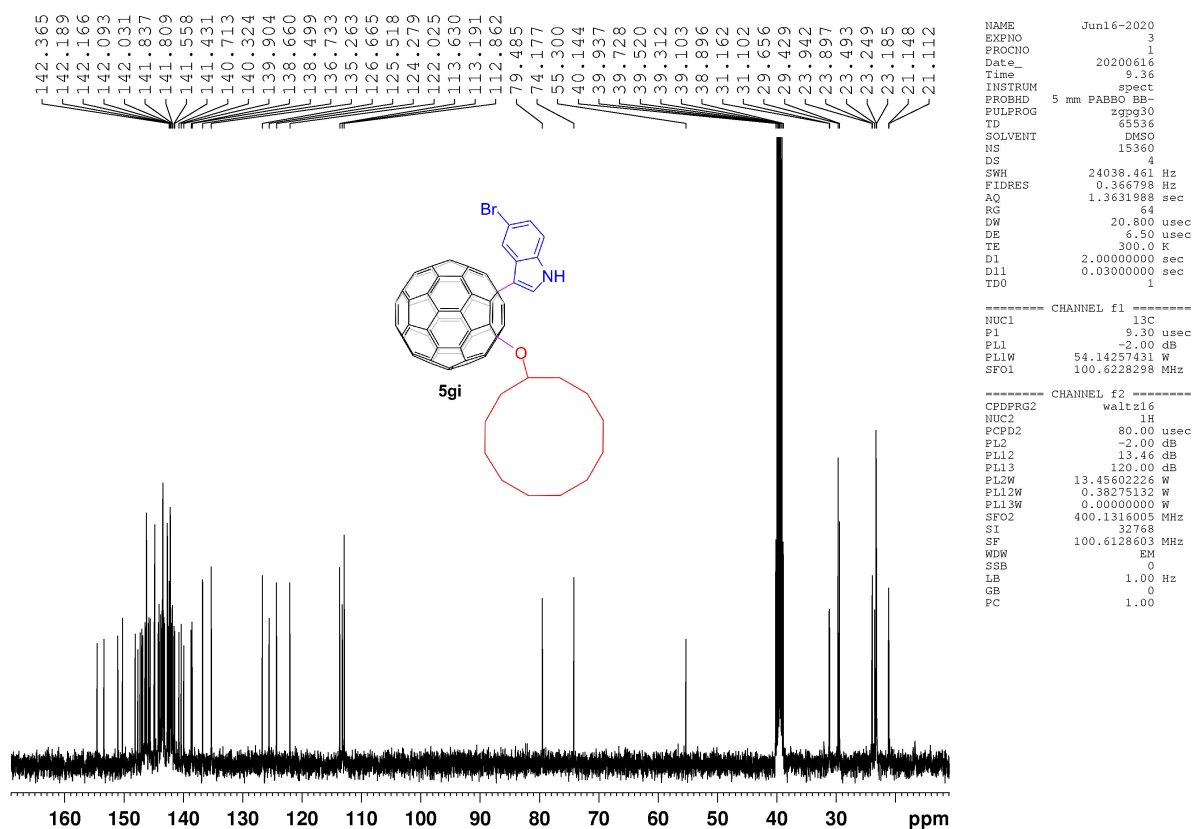

## **Expanded <sup>13</sup>C NMR (100 MHz, d<sub>6</sub>-DMSO/CS<sub>2</sub>) of compound 5gi**

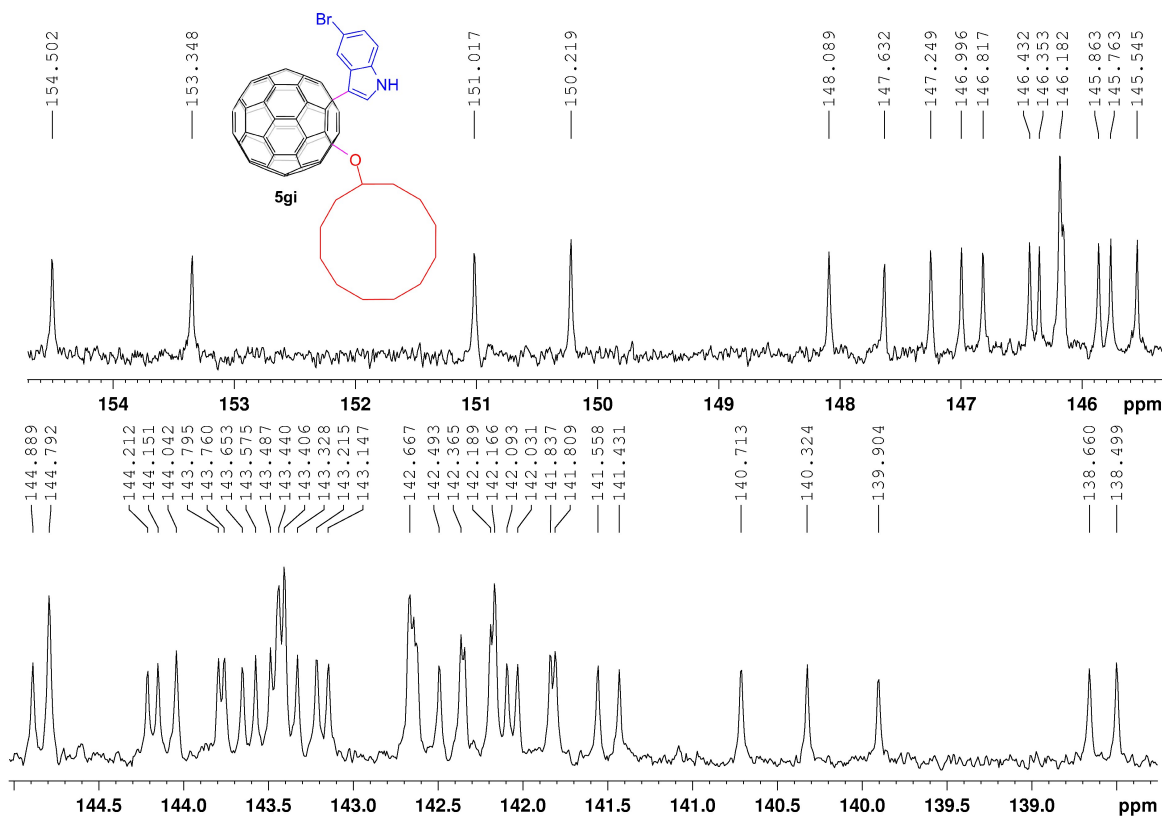

**$^1\text{H}$  NMR (400 MHz,  $\text{d}_6\text{-DMSO}/\text{CS}_2$ ) of compound 5gf**

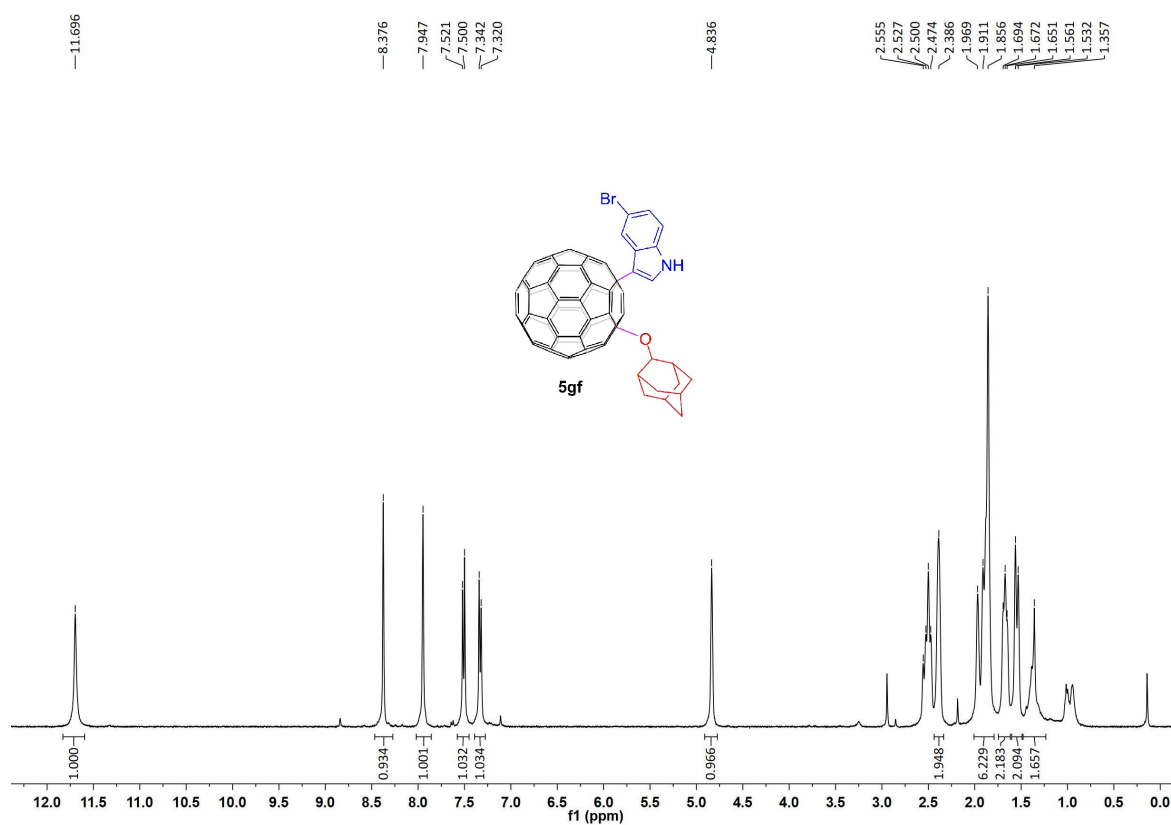

**$^{13}\text{C}$  NMR (100 MHz,  $\text{d}_6\text{-DMSO}/\text{CS}_2$ ) of compound 5gf**

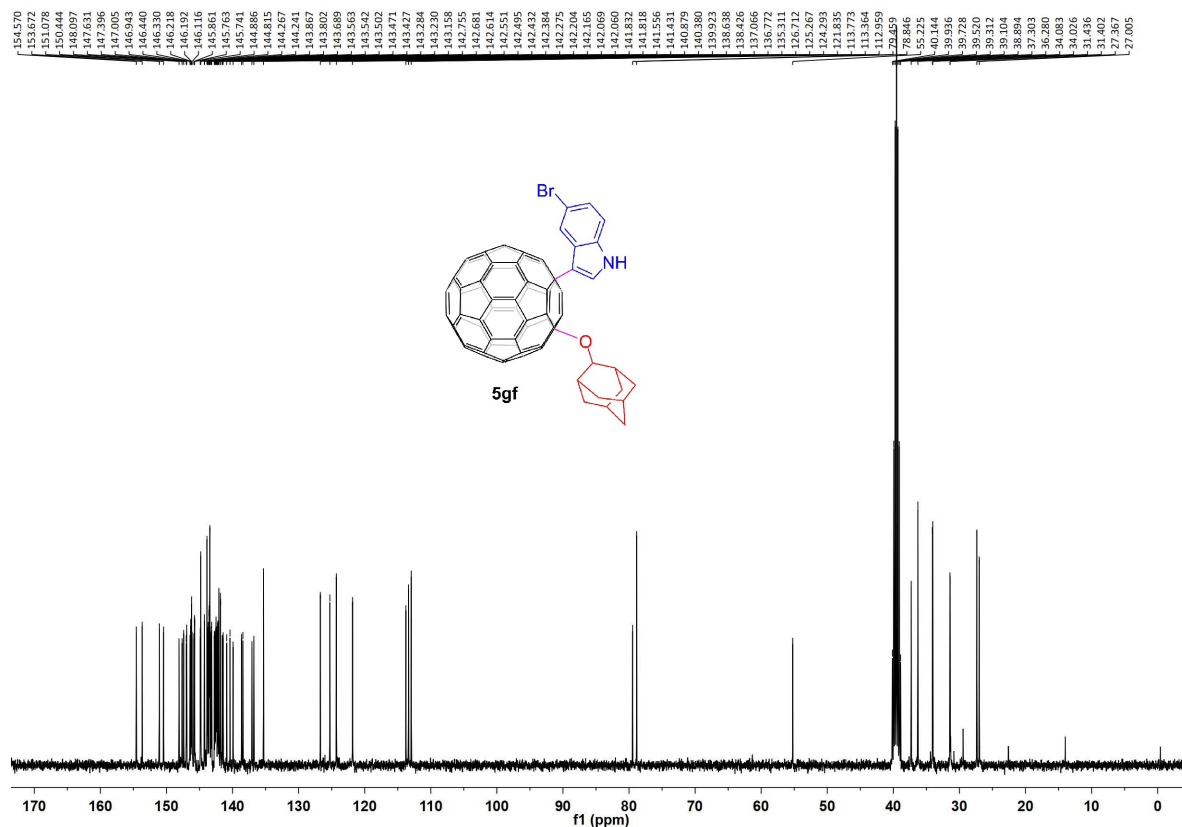

Figure 1 displays the  $^{13}\text{C}$  NMR spectra of compound **5gf**. The top spectrum shows the full  $^{13}\text{C}$  NMR spectrum, with chemical shifts ranging from 144.5 to 154.5 ppm. The bottom spectrum is an expansion of the aromatic region, ranging from 135.0 to 144.0 ppm. The chemical structure of **5gf** is shown, featuring a C<sub>60</sub> fullerene cage substituted with a 5-bromo-1H-indol-3-ylidene group and a 1,2,3,4,5-pentamethyl-1,2,3,4,5-tetrahydronaphthalen-1-ylidene group.

[illegible]

**<sup>13</sup>C NMR (100 MHz , Acetone-*d*<sub>6</sub>/CS<sub>2</sub>) of compound 5gh**

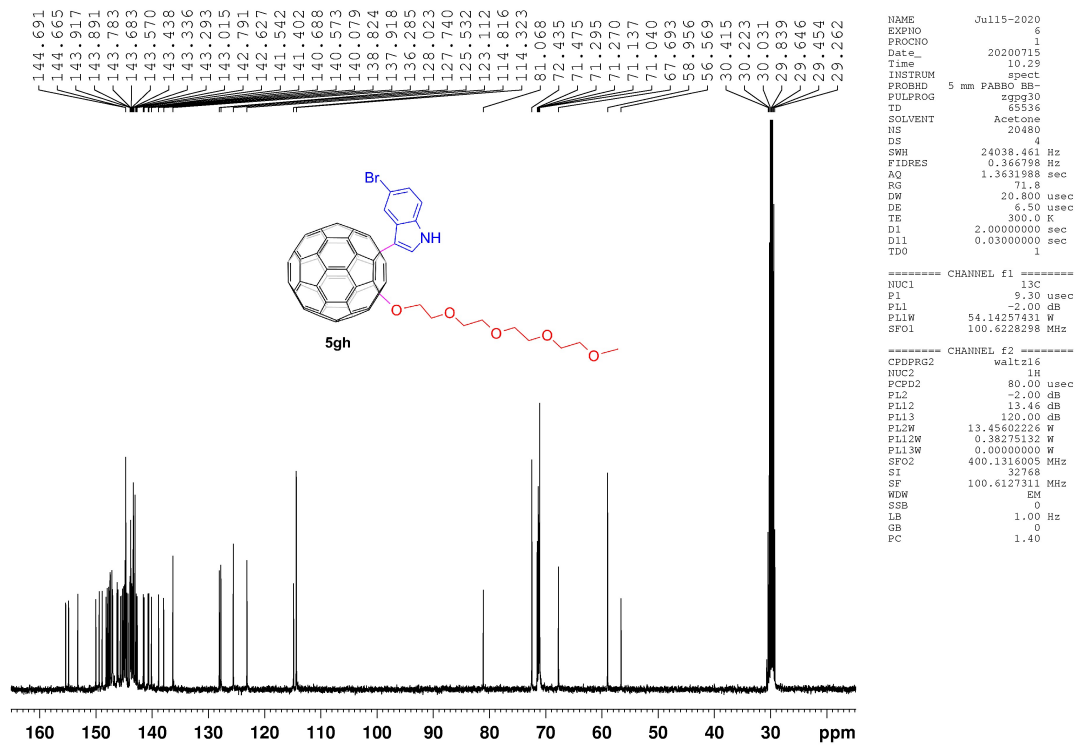

**Expanded  $^{13}\text{C}$  NMR (100 MHz, Acetone- $d_6$ /CS $_2$ ) of compound 5gh**

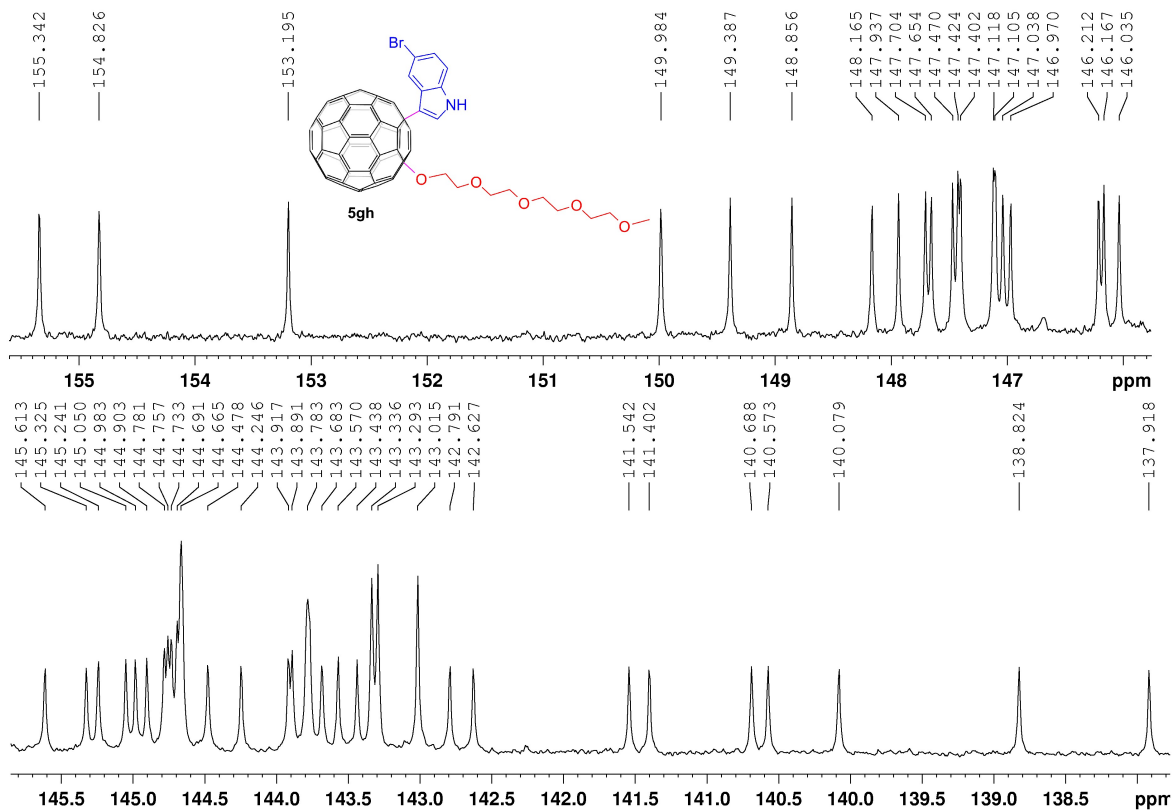

# <sup>1</sup>H NMR (400 MHz , Acetone-d<sub>6</sub>/CS<sub>2</sub>) of compound 5gg

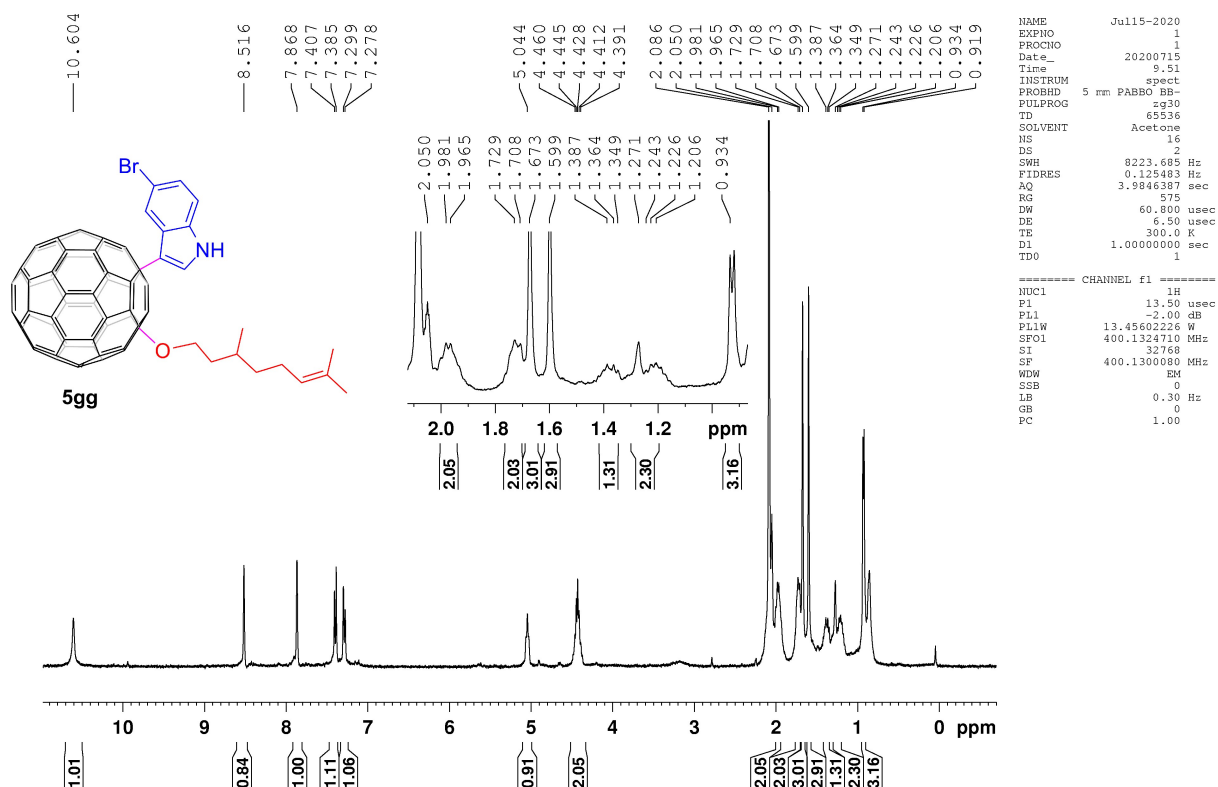

# <sup>13</sup>C NMR (100 MHz , d<sub>6</sub>-DMSO/CS<sub>2</sub>) of compound 5gg

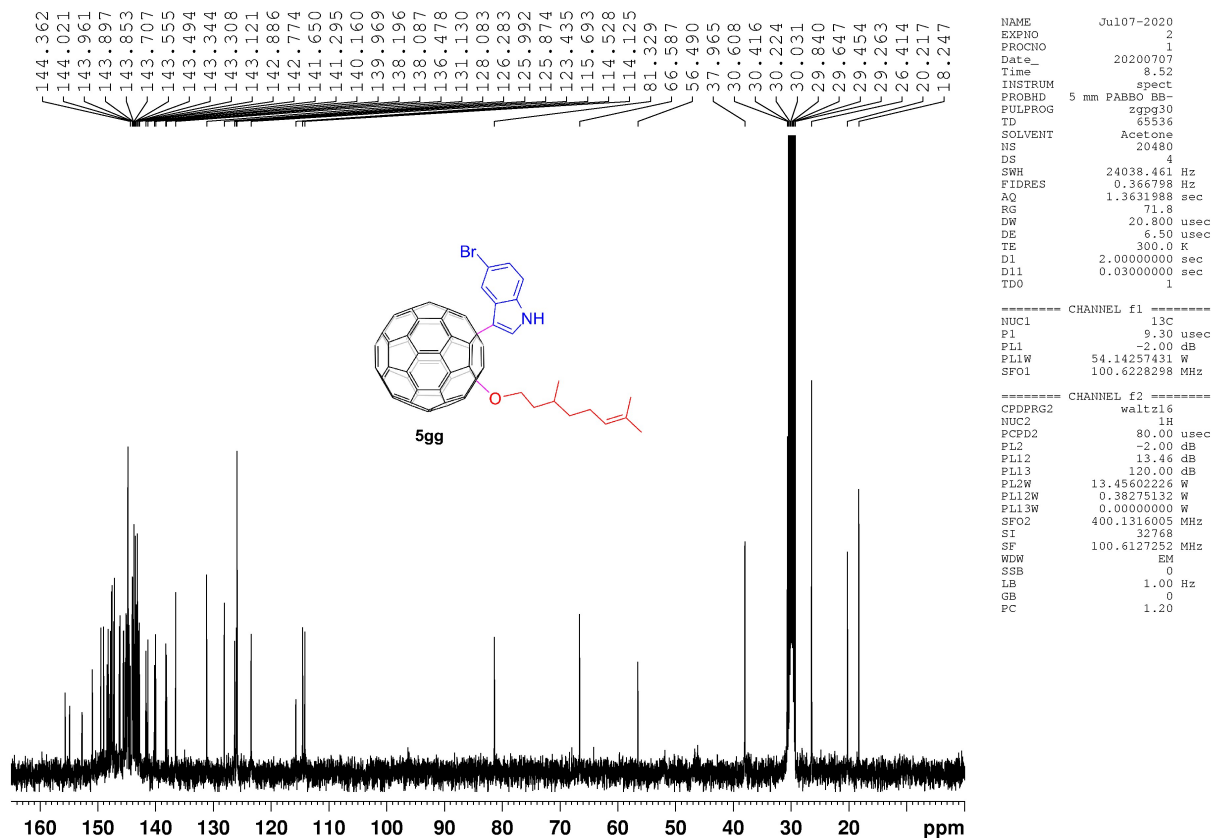



Expanded  $^{13}\text{C}$  NMR (100 MHz,  $\text{d}_6\text{-DMSO}/\text{CS}_2$ ) of compound **5gg**

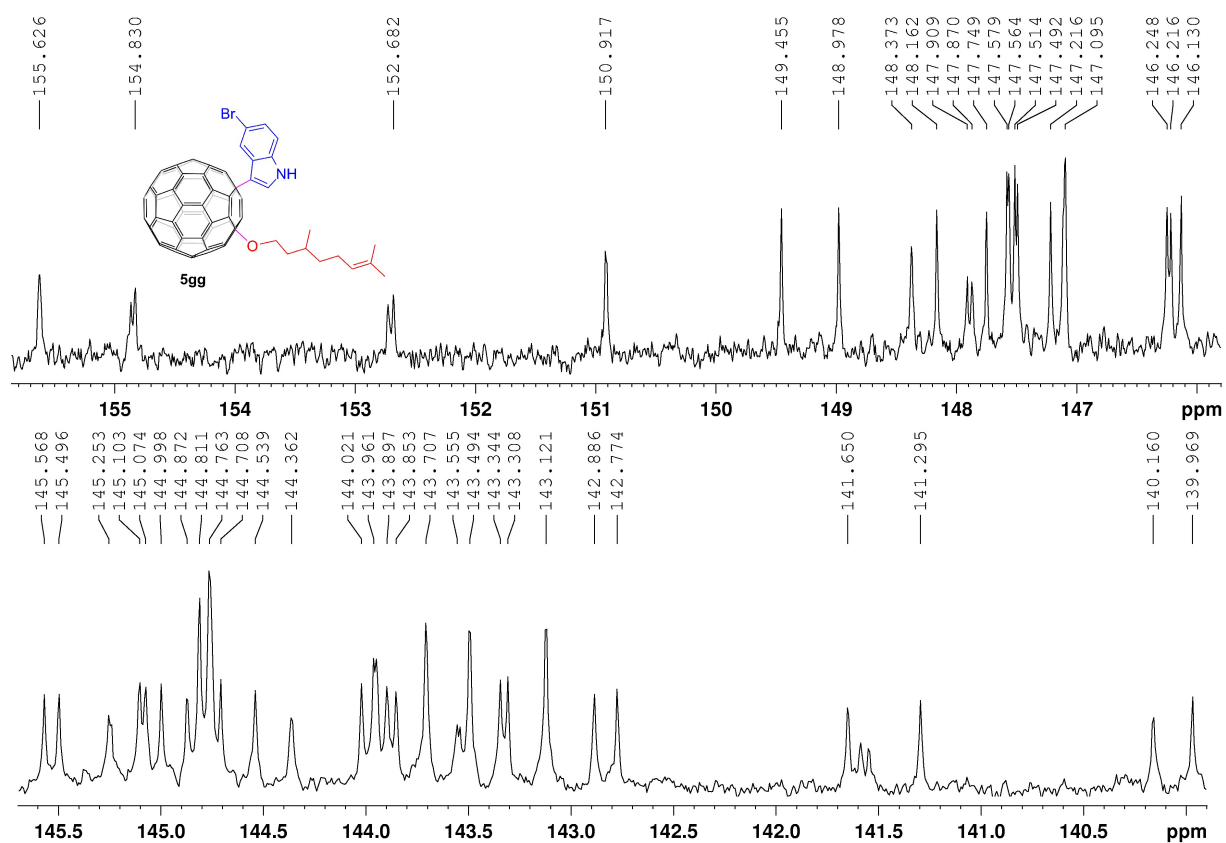

Expanded  $^{13}\text{C}$  NMR (100 MHz,  $\text{d}_6\text{-DMSO}/\text{CS}_2$ ) of compound **5gg**

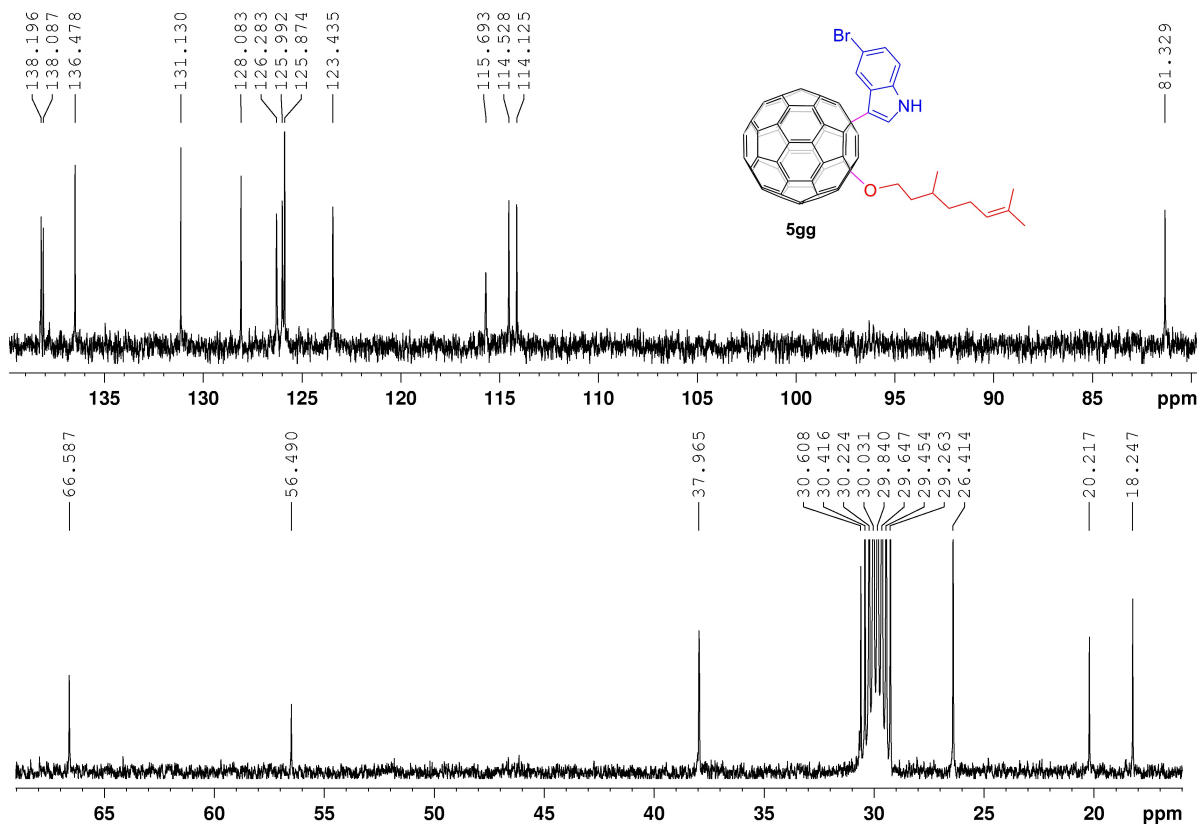

# <sup>1</sup>H NMR (400 MHz , Acetone-*d*<sub>6</sub>/CS<sub>2</sub>) of compound 5ij

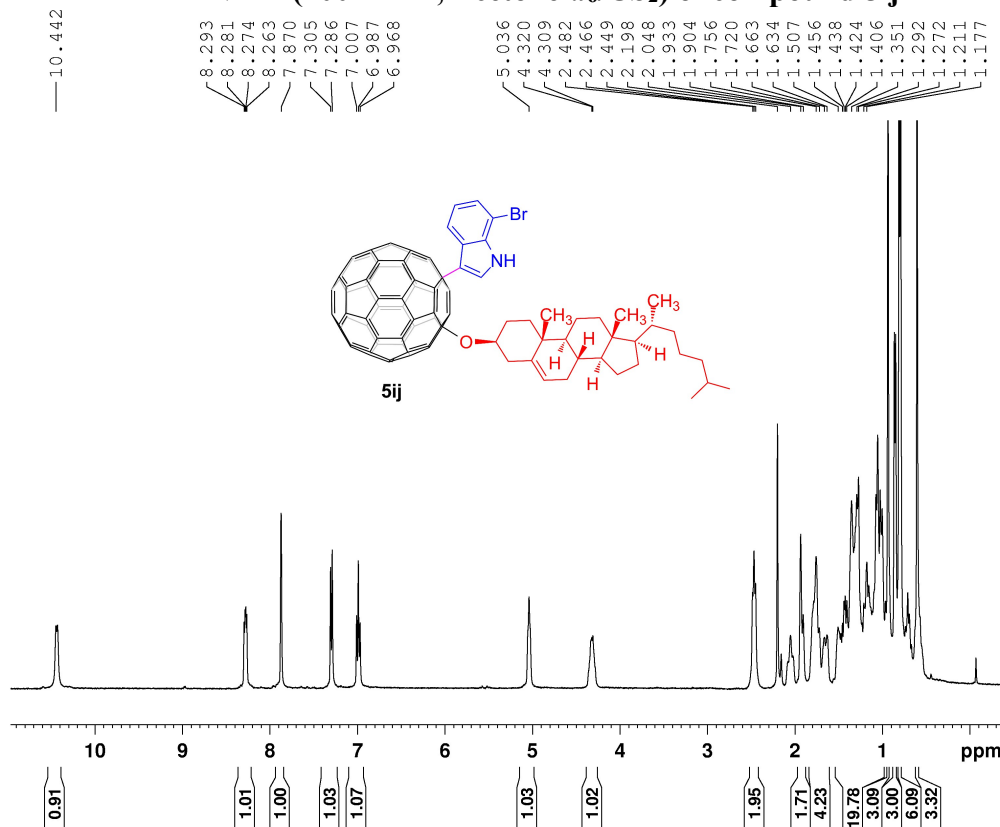

```

NAME      Jul20-2020
EXPNO     3
PROCNO    1
Date_     20200720
Time      10.00
INSTRUM   spect
PROBHD    5 mm PABBO BB-
PULPROG   zg30
TD         65536
SOLVENT   Acetone
NS         16
DS         2
SWH        8223.685 Hz
FIDRES     0.125483 Hz
AQ         3.9846387 sec
RG         287
DW         60.800 usec
DE         6.50 usec
TE         300.0 K
D1         1.00000000 sec
TD0        1

===== CHANNEL f1 =====
NUC1       1H
P1         13.50 usec
PL1        -2.00 dB
PL1W       13.45602226 W
SFO1       400.1324710 MHz
SI         32768
SF         400.1300547 MHz
WDW        EM
SSB        0
LB         0.30 Hz
GB         0
PC         1.00
  
```

# <sup>13</sup>C NMR (100 MHz , Acetone-*d*<sub>6</sub>/CS<sub>2</sub>) of compound 5ij

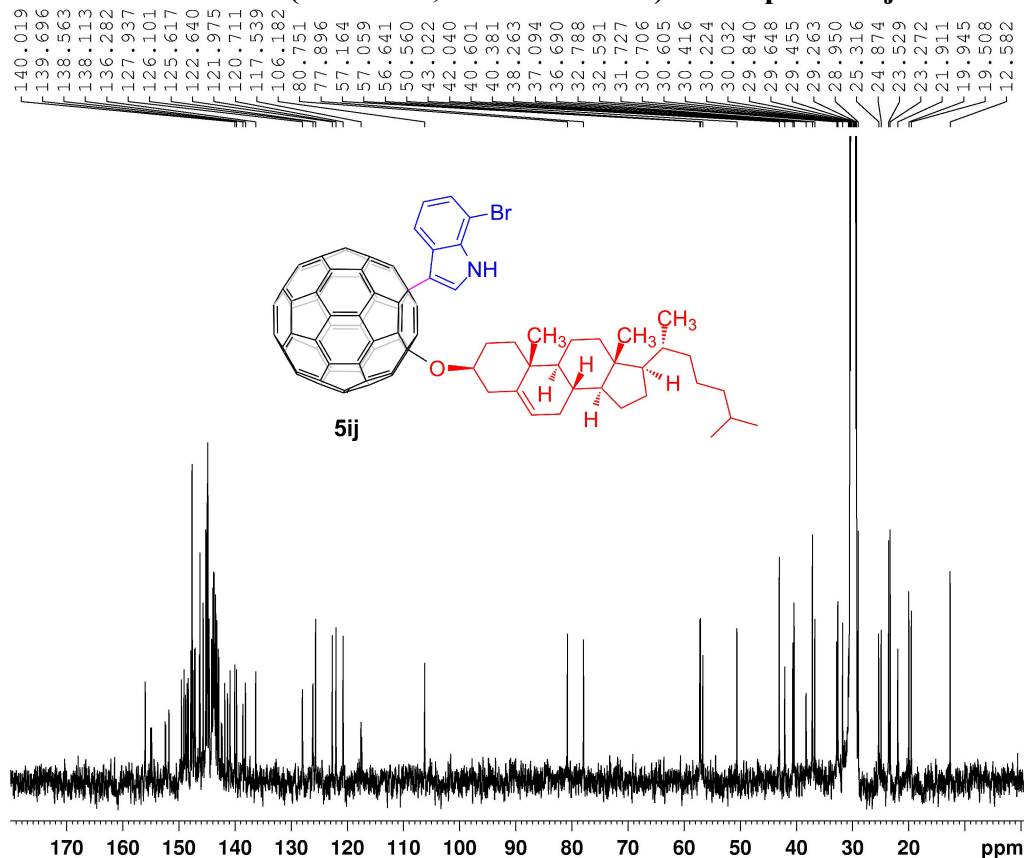

```

NAME      A424-d6-acetone
EXPNO     2
PROCNO    1
Date_     20200703
Time      16.19
INSTRUM   spect
PROBHD    5 mm PABBO BB-
PULPROG   zgpg30
TD         65536
SOLVENT   Acetone
NS         20480
DS         4
SWH        24038.461 Hz
FIDRES     0.366798 Hz
AQ         1.3631988 sec
RG         64
DW         20.800 usec
DE         6.50 usec
TE         300.0 K
D1         2.00000000 sec
D11        0.03000000 sec
TD0        1

===== CHANNEL f1 =====
NUC1       13C
P1         9.30 usec
PL1        -2.00 dB
PL1W       54.14257431 W
SFO1       100.6228238 MHz

===== CHANNEL f2 =====
CPDPRG2   waltz16
NUC2       1H
PCPD2      80.00 usec
PL2        -2.00 dB
PL12       13.46 dB
PL13       120.00 dB
PL2W       13.45602226 W
PL13W      0.38275132 W
PL13W      0.00000000 W
SFO2       400.1316005 MHz
SI         32768
SF         100.6127171 MHz
WDW        EM
SSB        0
LB         3.00 Hz
GB         0
PC         1.00
  
```

# Expanded $^{13}\text{C}$ NMR (100 MHz, Acetone- $d_6$ /CS $_2$ ) of compound **5ij**

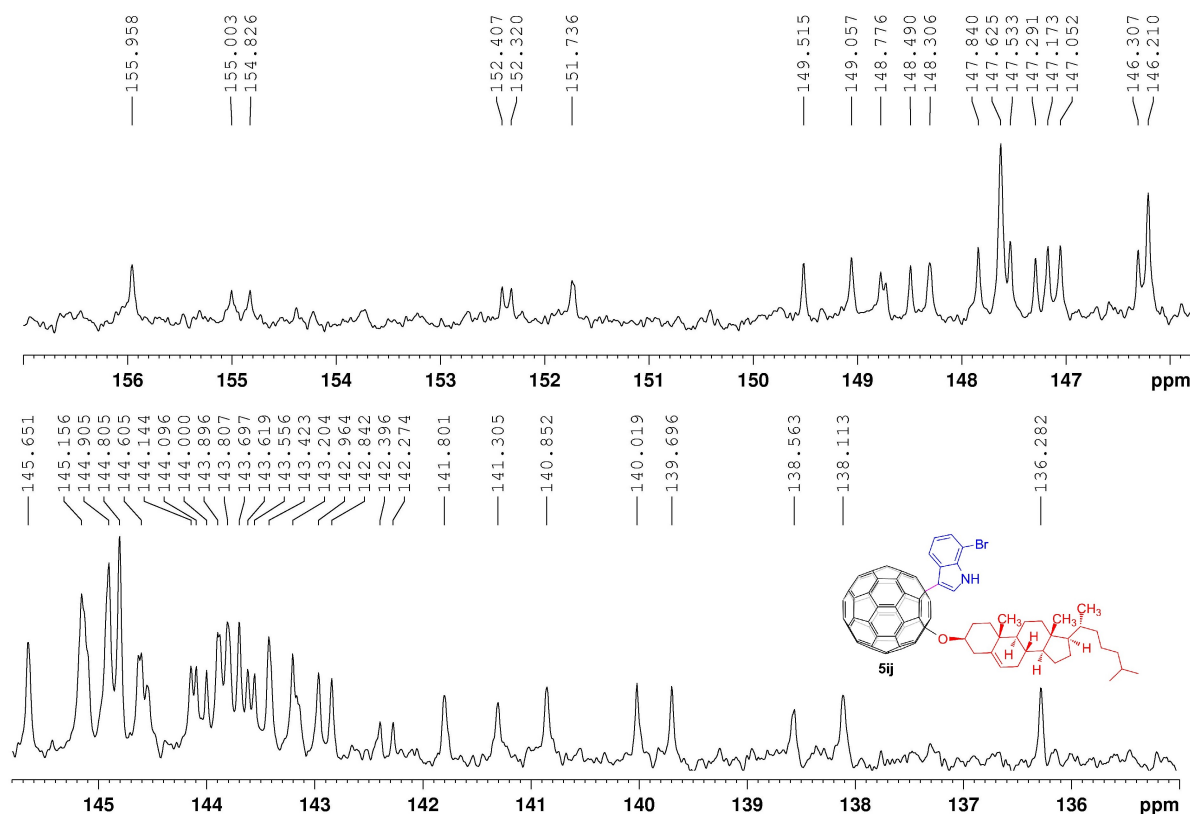

# $^1\text{H}$ NMR (400 MHz, Acetone- $d_6$ /CS $_2$ ) of compound **5hj**

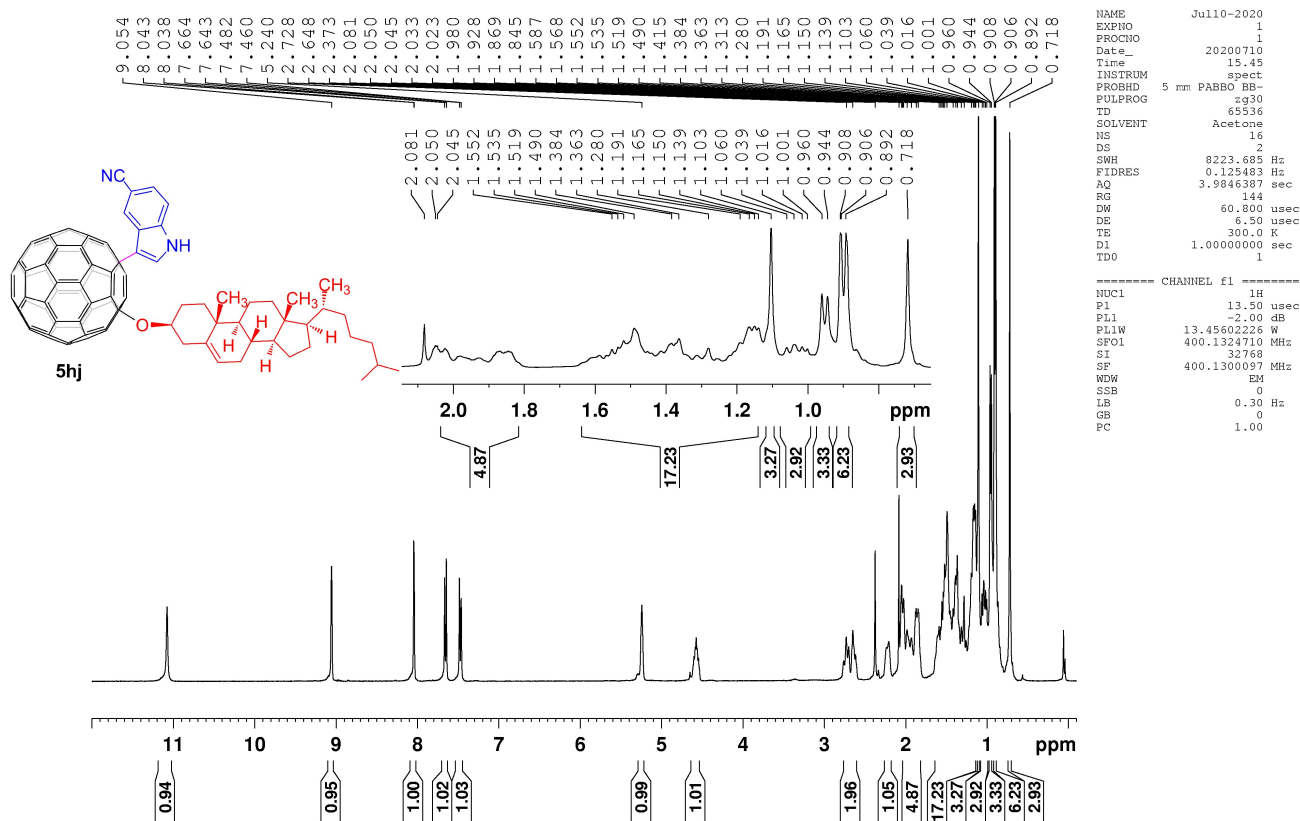

**$^{13}\text{C}$  NMR (100 MHz, Acetone- $d_6$ /CS $_2$ ) of compound 5hj**

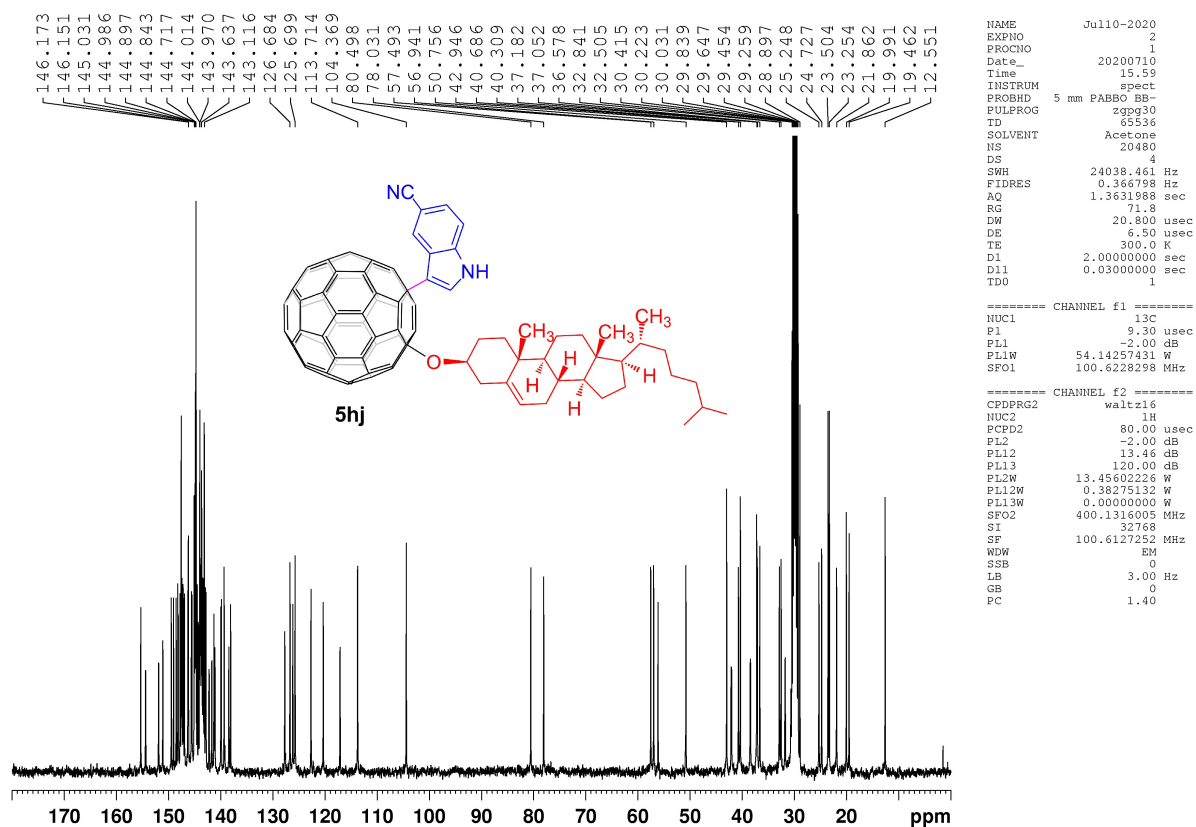

**Expanded  $^{13}\text{C}$  NMR (100 MHz, Acetone- $d_6$ /CS $_2$ ) of compound 5hj**

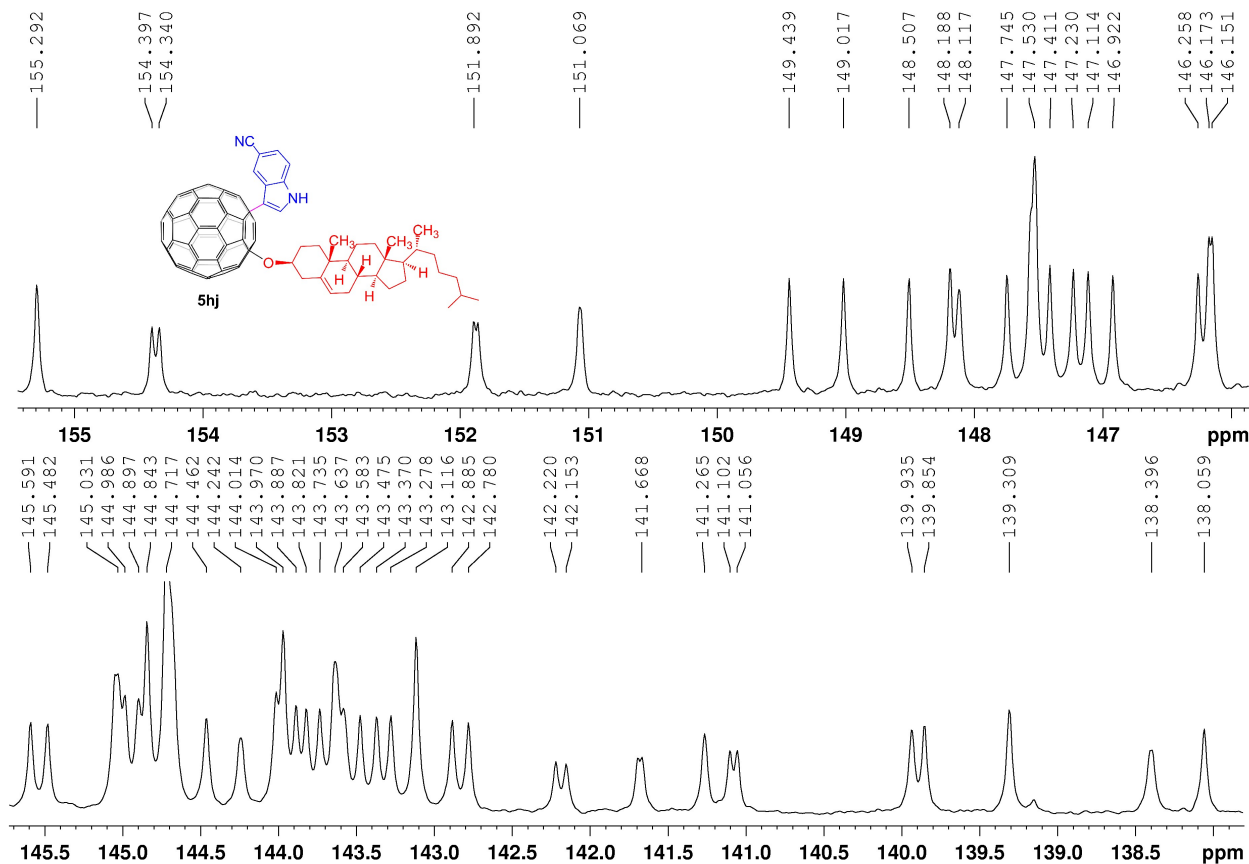

Expanded  $^{13}\text{C}$  NMR (100 MHz, Acetone- $d_6$ /CS $_2$ ) of compound 5hj

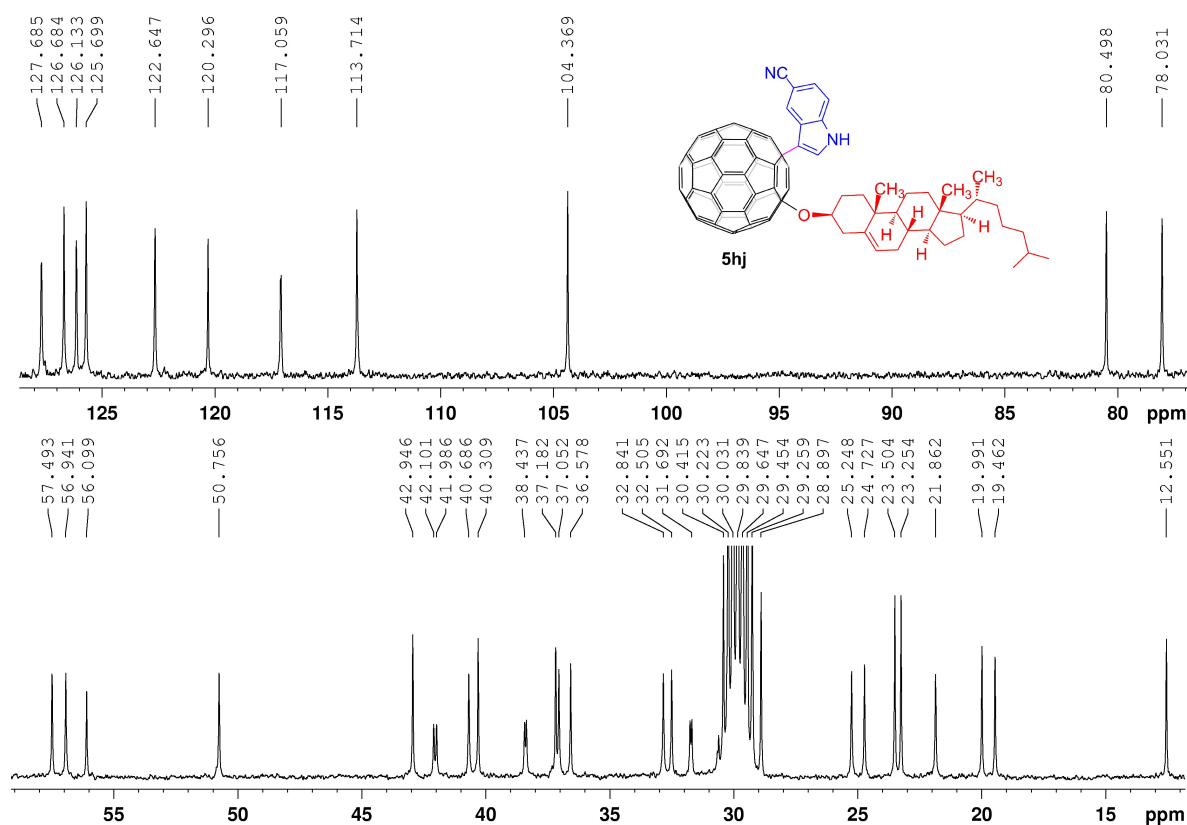

Expanded  $^{13}\text{C}$  NMR (100 MHz, Acetone- $d_6$ /CS $_2$ ) of compound 5ij

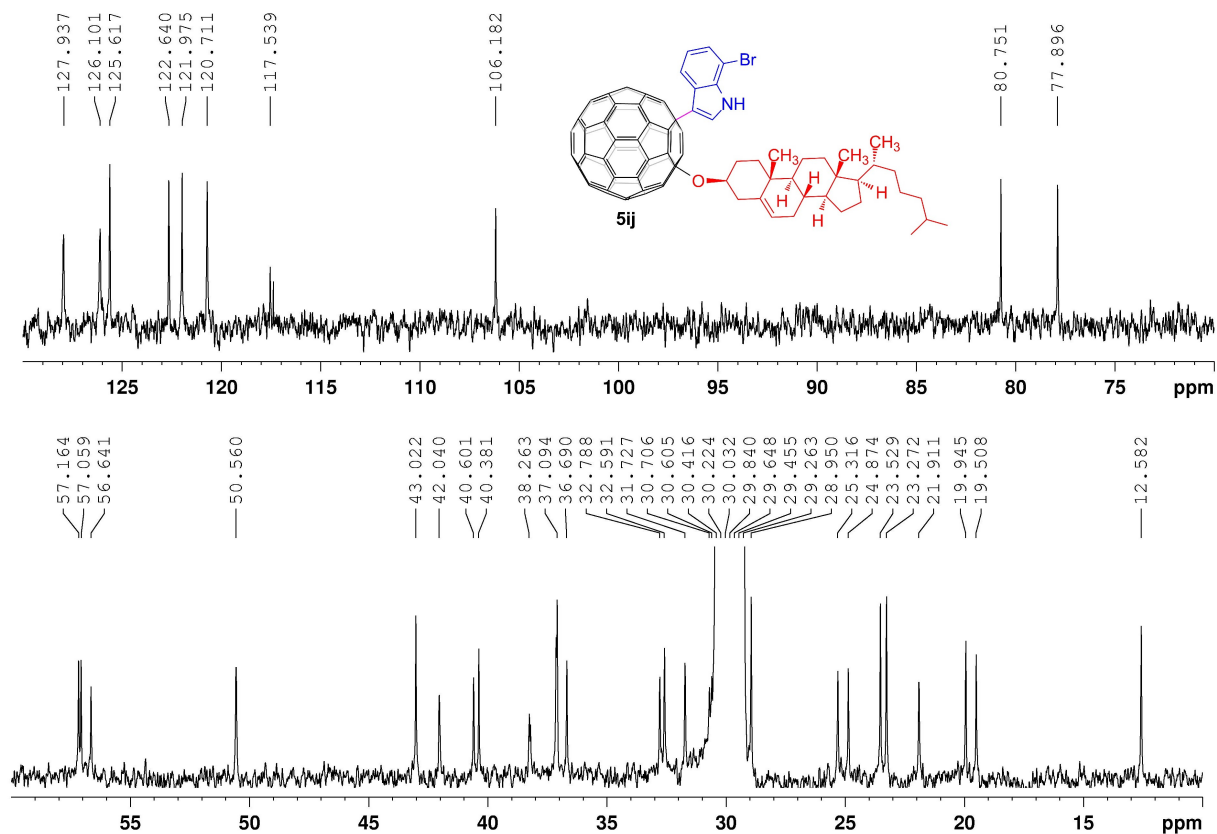

# <sup>1</sup>H NMR (400 MHz, Acetone-d<sub>6</sub>/CS<sub>2</sub>) of compound 5lj

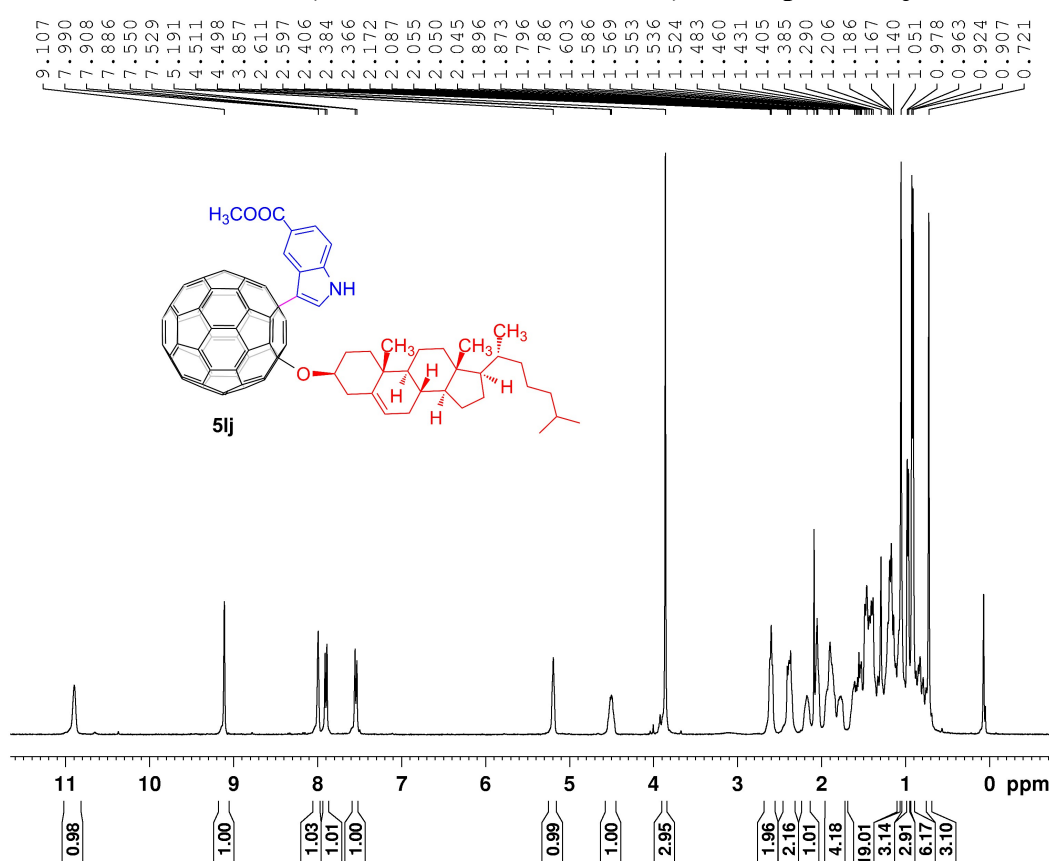

NAME Jul13-2020  
EXPNO 1  
PROCNO 1  
Date\_ 20200713  
Time\_ 10.05  
INSTRUM spect  
PROBHD 5 mm PABBO BB-  
PULPROG zg30  
TD 65536  
SOLVENT Acetone  
NS 16  
DS 2  
SWH 8223.685 Hz  
FIDRES 0.125483 Hz  
AQ 3.9846387 sec  
RG 161  
DW 60.800 usec  
DE 6.50 usec  
TE 300.0 K  
D1 1.00000000 sec  
TD0 1

===== CHANNEL f1 =====  
NUC1 1H  
P1 13.50 usec  
PL1 -2.00 dB  
PL1W 13.45602226 W  
SF01 400.1324710 MHz  
SI 32768  
SF 400.1300075 MHz  
WDW EM  
SSB 0  
LB 0.30 Hz  
GB 0  
PC 1.00

# <sup>13</sup>C NMR (100 MHz, Acetone-d<sub>6</sub>/CS<sub>2</sub>) of compound 5lj

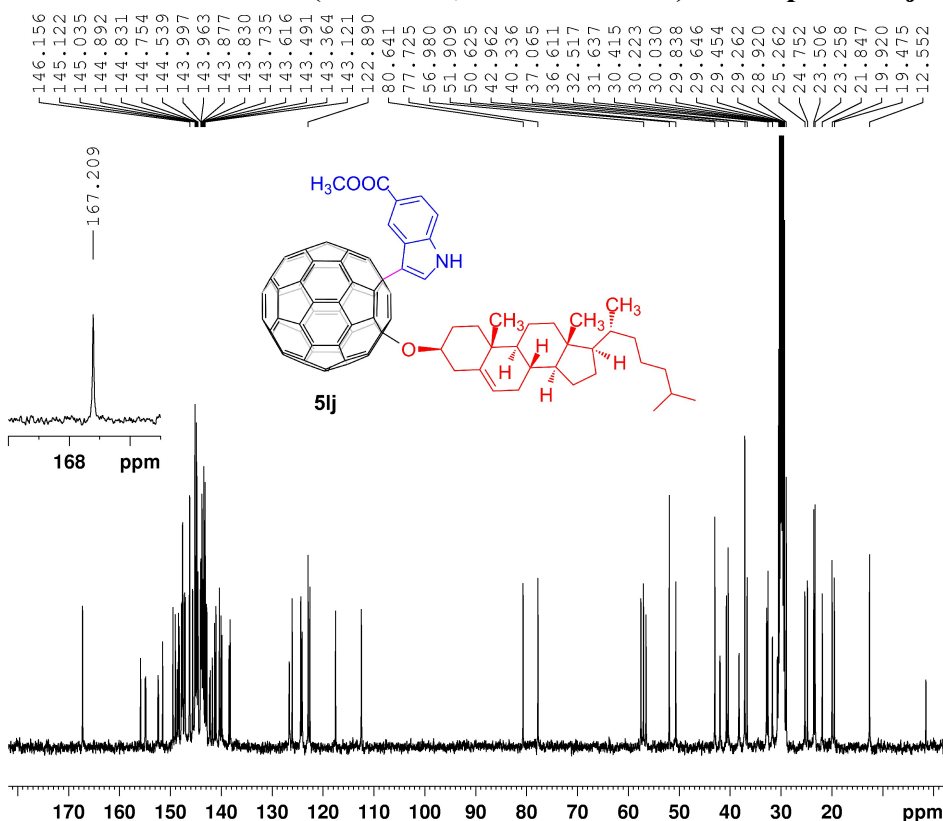

NAME Jul13-2020  
EXPNO 2  
PROCNO 1  
Date\_ 20200713  
Time\_ 10.18  
INSTRUM spect  
PROBHD 5 mm PABBO BB-  
PULPROG zgpg30  
TD 65536  
SOLVENT Acetone  
NS 20480  
DS 4  
SWH 24038.461 Hz  
FIDRES 0.366798 Hz  
AQ 1.3631988 sec  
RG 80.6  
DW 20.800 usec  
DE 6.50 usec  
TE 300.0 K  
D1 2.00000000 sec  
D11 0.03000000 sec  
TD0 1

===== CHANNEL f1 =====  
NUC1 13C  
P1 9.30 usec  
PL1 -2.00 dB  
PL1W 54.14257431 W  
SF01 100.6228298 MHz

===== CHANNEL f2 =====  
CPDPRG2 waltz16  
NUC2 1H  
PCPD2 80.00 usec  
PL2 -2.00 dB  
PL12 13.46 dB  
PL13 120.00 dB  
PL2W 13.45602226 W  
PL12W 0.38275132 W  
PL13W 0.00000000 W  
SFO2 400.1316005 MHz  
SI 32768  
SF 100.6127222 MHz  
WDW EM  
SSB 0  
LB 3.00 Hz  
GB 0  
PC 1.40

Expanded  $^{13}\text{C}$  NMR (100 MHz, Acetone- $d_6$ /CS $_2$ ) of compound 5lj

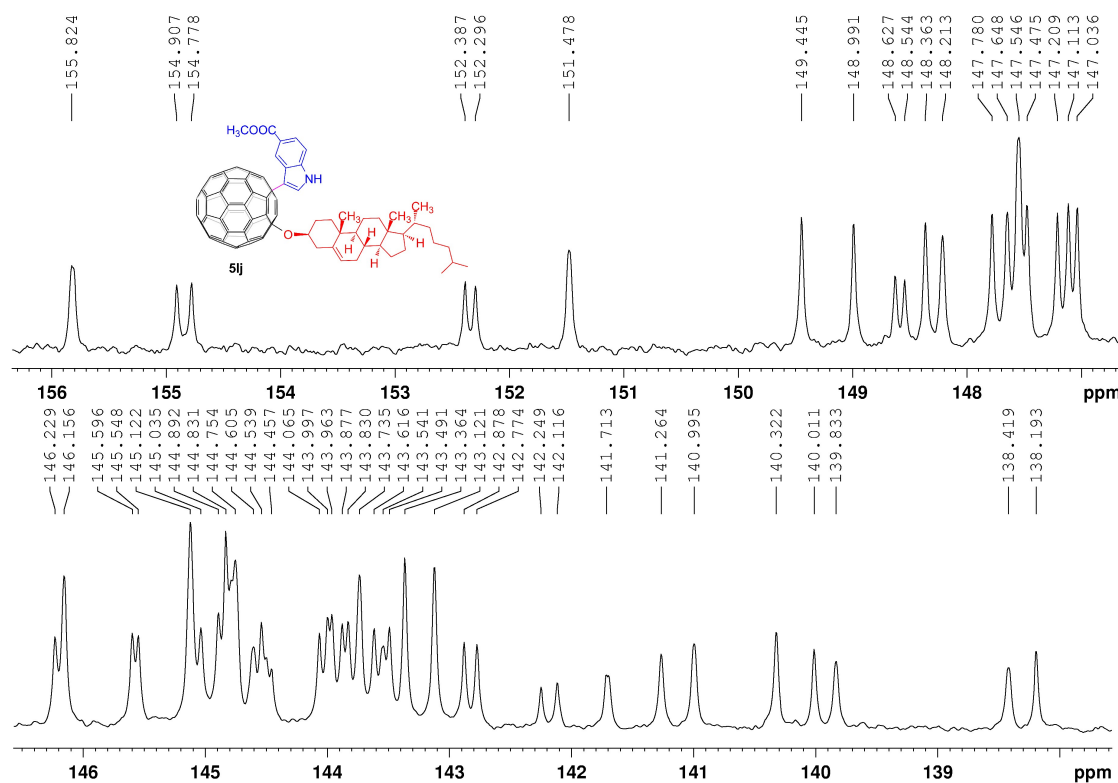

Expanded  $^{13}\text{C}$  NMR (100 MHz, Acetone- $d_6$ /CS $_2$ ) of compound 5lj

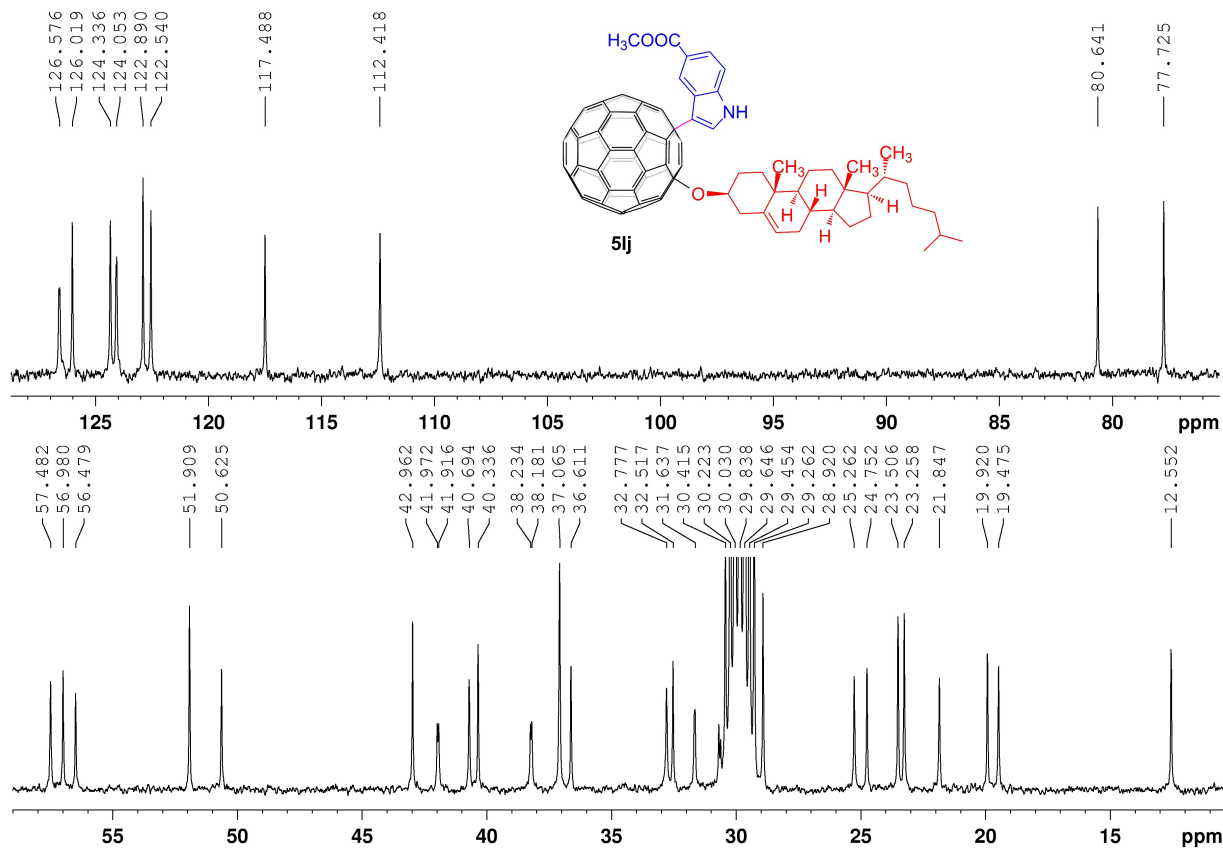



## 2. Single-Crystal X-Ray Crystallography of 2d, 3g, and 5aa

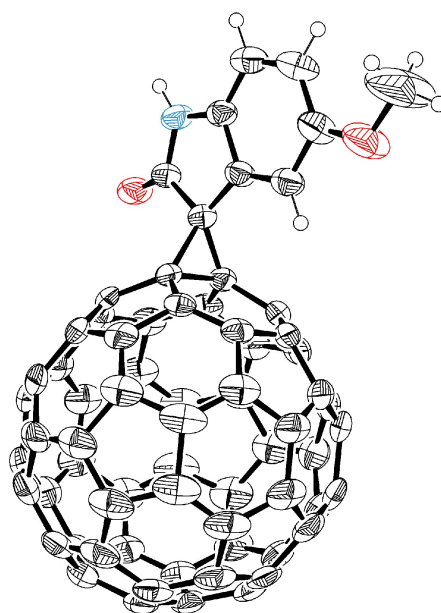

**2d: X-ray crystal structure**  
**CCDC number: 2025910**

**Figure S1** ORTEP diagrams of **2d** with 50% thermal ellipsoids. The solvent molecules are omitted for clarity.

Black block crystals of **2d** suitable for X-ray diffraction were obtained from slow evaporation of its solution in a mixture of CS<sub>2</sub> and DMSO at room temperature. Single-crystal X-ray diffraction data were collected on a diffractometer (DECTRIS PILATUS 300K, STOE & Cie GmbH) equipped with a CCD area detector using graphite-monochromated Cu K $\alpha$  radiation ( $\lambda = 1.54184$  Å) in the scan range  $8.90^\circ < 2\theta < 140.22^\circ$ . The structure was solved with direct methods using SHELXS-97 and refined with full-matrix least-squares refinement using the SHELXL-97 program within OLEX2. Crystallographic data have been deposited in the Cambridge Crystallographic Data Centre as deposition number CCDC 2025910.

| Table 1 Crystal data and structure refinement for 2d. |                                                                               |
|-------------------------------------------------------|-------------------------------------------------------------------------------|
| Identification code                                   | <b>2d</b>                                                                     |
| Empirical formula                                     | C <sub>144</sub> H <sub>26</sub> N <sub>2</sub> O <sub>7</sub> S <sub>6</sub> |
| Formula weight                                        | 4176.05                                                                       |
| Temperature/K                                         | 293(2)                                                                        |
| Crystal system                                        | triclinic                                                                     |
| Space group                                           | P-1                                                                           |
| a/Å                                                   | 10.1194(5)                                                                    |
| b/Å                                                   | 17.9287(10)                                                                   |

|                                                |                                                                       |
|------------------------------------------------|-----------------------------------------------------------------------|
| c/Å                                            | 25.0200(13)                                                           |
| $\alpha/^\circ$                                | 70.326(4)                                                             |
| $\beta/^\circ$                                 | 78.550(4)                                                             |
| $\gamma/^\circ$                                | 78.428(4)                                                             |
| Volume/Å <sup>3</sup>                          | 4145.0(4)                                                             |
| Z                                              | 1                                                                     |
| $\rho_{\text{calc}}/\text{g}/\text{cm}^3$      | 1.673                                                                 |
| $\mu/\text{mm}^{-1}$                           | 2.184                                                                 |
| F(000)                                         | 2112.0                                                                |
| Crystal size/mm <sup>3</sup>                   | 0.3 × 0.2 × 0.1                                                       |
| Radiation                                      | CuK $\alpha$ ( $\lambda$ = 1.54186)                                   |
| 2 $\theta$ range for data collection/ $^\circ$ | 7.402 to 132.988                                                      |
| Index ranges                                   | -5 $\leq$ h $\leq$ 12, -19 $\leq$ k $\leq$ 21, -28 $\leq$ l $\leq$ 29 |
| Reflections collected                          | 32443                                                                 |
| Independent reflections                        | 14135 [ $R_{\text{int}}$ = 0.0226, $R_{\text{sigma}}$ = 0.0217]       |
| Data/restraints/parameters                     | 14135/0/1438                                                          |
| Goodness-of-fit on $F^2$                       | 1.036                                                                 |
| Final R indexes [ $I \geq 2\sigma(I)$ ]        | $R_1$ = 0.0856, $wR_2$ = 0.2462                                       |
| Final R indexes [all data]                     | $R_1$ = 0.1079, $wR_2$ = 0.2645                                       |
| Largest diff. peak/hole / e Å <sup>-3</sup>    | 1.14/-0.98                                                            |

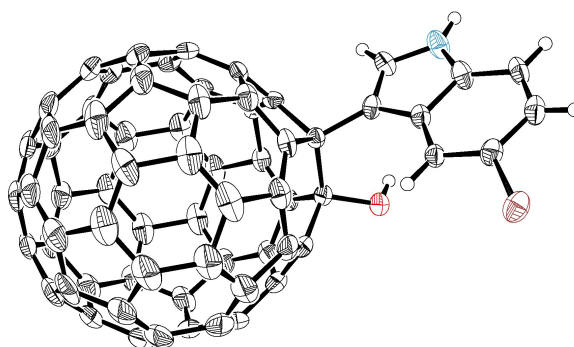

**3g: X-ray crystal structure**  
**CCDC number: 2025917**

**Figure S2** ORTEP diagrams of **3g** with 50% thermal ellipsoids. The solvent molecules are omitted for clarity.

Black block crystals of **3g** suitable for X-ray diffraction were obtained from slow evaporation in a mixture of CS<sub>2</sub> and methanol at room temperature. Single-crystal

X-ray diffraction data were collected on a diffractometer (DECTRIS PILATUS 300K, STOE & Cie GmbH) equipped with a CCD area detector using graphite-monochromated Cu K $\alpha$  radiation ( $\lambda = 1.54184 \text{ \AA}$ ) in the scan range  $8.90^\circ < 2\theta < 140.22^\circ$ . The structure was solved with direct methods using SHELXS-97 and refined with full-matrix least-squares refinement using the SHELXL-97 program within OLEX2. Crystallographic data have been deposited in the Cambridge Crystallographic Data Centre as deposition number CCDC 2025917.

| <b>Table 2 Crystal data and structure refinement for 3g.</b> |                                                                   |
|--------------------------------------------------------------|-------------------------------------------------------------------|
| Identification code                                          | <b>3g</b>                                                         |
| Empirical formula                                            | C <sub>68</sub> H <sub>6</sub> BrNO                               |
| Formula weight                                               | 932.65                                                            |
| Temperature/K                                                | 293(2)                                                            |
| Crystal system                                               | monoclinic                                                        |
| Space group                                                  | P2 <sub>1</sub> /c                                                |
| a/ $\text{\AA}$                                              | 21.873(6)                                                         |
| b/ $\text{\AA}$                                              | 10.168(3)                                                         |
| c/ $\text{\AA}$                                              | 19.646(7)                                                         |
| $\alpha/^\circ$                                              | 90                                                                |
| $\beta/^\circ$                                               | 114.02(2)                                                         |
| $\gamma/^\circ$                                              | 90                                                                |
| Volume/ $\text{\AA}^3$                                       | 3991(2)                                                           |
| Z                                                            | 4                                                                 |
| $\rho_{\text{calc}}/\text{g/cm}^3$                           | 1.552                                                             |
| $\mu/\text{mm}^{-1}$                                         | 1.844                                                             |
| F(000)                                                       | 1856.0                                                            |
| Crystal size/ $\text{mm}^3$                                  | 0.23 $\times$ 0.21 $\times$ 0.07                                  |
| Radiation                                                    | CuK $\alpha$ ( $\lambda = 1.54186$ )                              |
| 2 $\theta$ range for data collection/ $^\circ$               | 8.852 to 139.354                                                  |
| Index ranges                                                 | $-20 \leq h \leq 26$ , $-11 \leq k \leq 5$ , $-23 \leq l \leq 20$ |
| Reflections collected                                        | 16721                                                             |
| Independent reflections                                      | 7218 [ $R_{\text{int}} = 0.0552$ , $R_{\text{sigma}} = 0.0563$ ]  |
| Data/restraints/parameters                                   | 7218/0/641                                                        |
| Goodness-of-fit on $F^2$                                     | 1.028                                                             |
| Final R indexes [ $I > 2\sigma(I)$ ]                         | $R_1 = 0.0835$ , $wR_2 = 0.2271$                                  |
| Final R indexes [all data]                                   | $R_1 = 0.0947$ , $wR_2 = 0.2368$                                  |
| Largest diff. peak/hole / $e \text{ \AA}^{-3}$               | 1.44/-1.19                                                        |

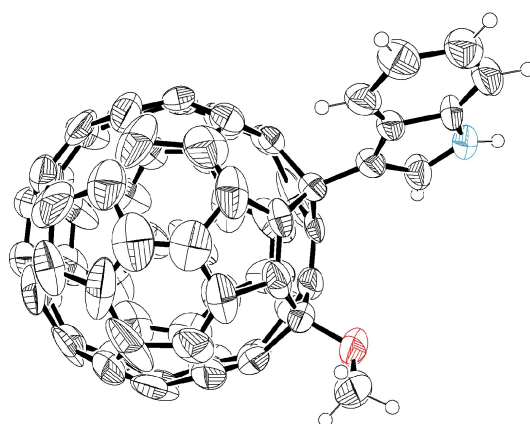

**5aa: X-ray crystal structure**  
**CCDC number: 2025919**

**Figure S3** ORTEP diagrams of **5aa** with 50% thermal ellipsoids. The solvent molecules are omitted for clarity.

Black block crystals of **5aa** suitable for X-ray diffraction were obtained from slow evaporation in a mixture of CS<sub>2</sub> and methanol at room temperature. Single-crystal X-ray diffraction data were collected on a diffractometer (DECTRIS PILATUS 300K, STOE & Cie GmbH) equipped with a CCD area detector using graphite-monochromated Cu K $\alpha$  radiation ( $\lambda = 1.54184$  Å) in the scan range  $8.90^\circ < 2\theta < 140.22^\circ$ . The structure was solved with direct methods using SHELXS-97 and refined with full-matrix least-squares refinement using the SHELXL-97 program within OLEX2. Crystallographic data have been deposited in the Cambridge Crystallographic Data Centre as deposition number CCDC 2025919.

| <b>Table 3 Crystal data and structure refinement for 5aa.</b> |                                                 |
|---------------------------------------------------------------|-------------------------------------------------|
| Identification code                                           | <b>5aa</b>                                      |
| Empirical formula                                             | C <sub>71</sub> H <sub>9</sub> NOS <sub>4</sub> |
| Formula weight                                                | 1020.03                                         |
| Temperature/K                                                 | 293(2)                                          |
| Crystal system                                                | monoclinic                                      |
| Space group                                                   | P2 <sub>1</sub> /n                              |
| a/Å                                                           | 10.1582(5)                                      |
| b/Å                                                           | 16.9627(10)                                     |
| c/Å                                                           | 23.5264(12)                                     |
| $\alpha/^\circ$                                               | 90                                              |
| $\beta/^\circ$                                                | 95.305(4)                                       |
| $\gamma/^\circ$                                               | 90                                              |
| Volume/Å <sup>3</sup>                                         | 4036.5(4)                                       |

|                                                       |                                                                        |
|-------------------------------------------------------|------------------------------------------------------------------------|
| Z                                                     | 4                                                                      |
| $\rho_{\text{calc}}/\text{cm}^3$                      | 1.678                                                                  |
| $\mu/\text{mm}^{-1}$                                  | 2.650                                                                  |
| F(000)                                                | 2056.0                                                                 |
| Crystal size/ $\text{mm}^3$                           | 0.3 × 0.2 × 0.1                                                        |
| Radiation                                             | CuK $\alpha$ ( $\lambda$ = 1.54186)                                    |
| 2 $\theta$ range for data collection/ $^\circ$        | 9.176 to 139.614                                                       |
| Index ranges                                          | -11 $\leq$ h $\leq$ 12, -16 $\leq$ k $\leq$ 20, -19 $\leq$ l $\leq$ 28 |
| Reflections collected                                 | 11433                                                                  |
| Independent reflections                               | 5365 [ $R_{\text{int}}$ = 0.0937, $R_{\text{sigma}}$ = 0.0804]         |
| Data/restraints/parameters                            | 5365/0/641                                                             |
| Goodness-of-fit on $F^2$                              | 0.962                                                                  |
| Final R indexes [ $I \geq 2\sigma(I)$ ]               | $R_1$ = 0.0619, $wR_2$ = 0.1205                                        |
| Final R indexes [all data]                            | $R_1$ = 0.1420, $wR_2$ = 0.1587                                        |
| Largest diff. peak/hole / $\text{e } \text{\AA}^{-3}$ | 0.17/-0.13                                                             |

### 3. HPLC Profiles of the reaction mixtures for the synthesis of 2a, 2e, 3g and 5ie

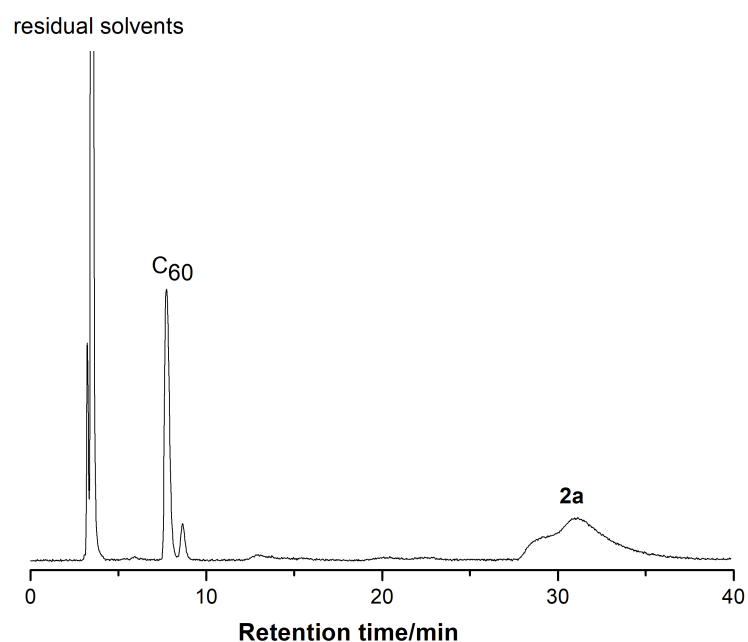

**Figure S4.** The HPLC profile of the reaction mixtures of toluene solution containing **2a** monitored by HPLC. HPLC column: Cosmosil Buckyprep column (4.6 × 250 mm; toluene, 1 mL/min; 326 nm; 25 °C).

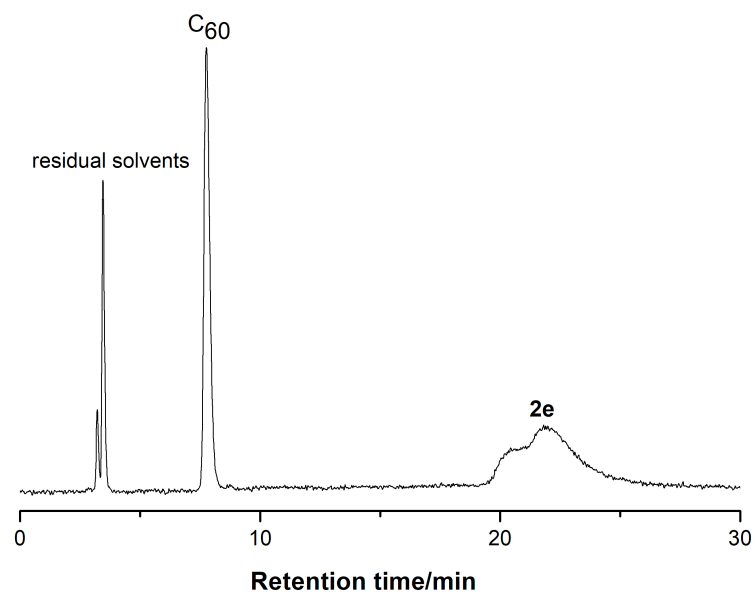

**Figure S5.** The HPLC profile of the reaction mixtures of toluene solution containing **2e** monitored by HPLC. HPLC column: Cosmosil Buckyprep column (4.6 ×250 mm; toluene, 1 mL/min; 326 nm; 25 °C).

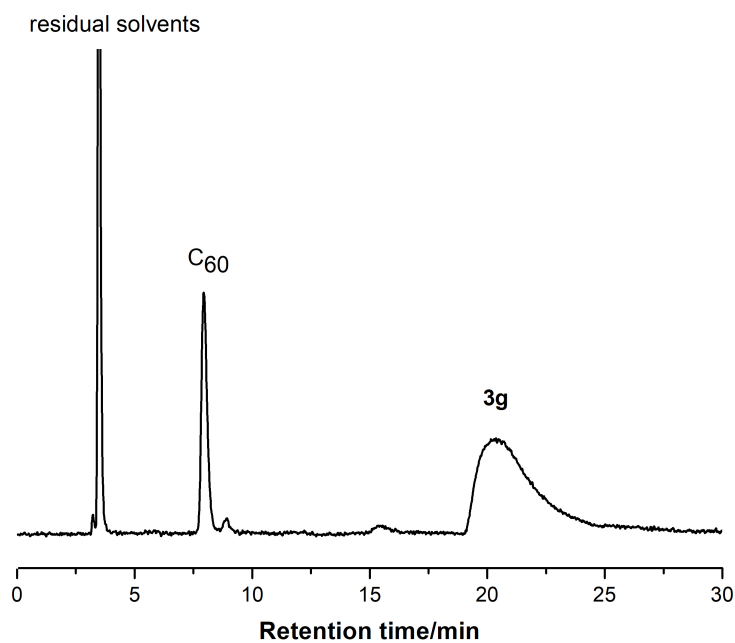

**Figure S6.** The HPLC profile of the reaction mixtures of toluene solution containing **3g** monitored by HPLC. HPLC column: Cosmosil Buckyprep column (4.6 ×250 mm; toluene, 1 mL/min; 326 nm; 25 °C).



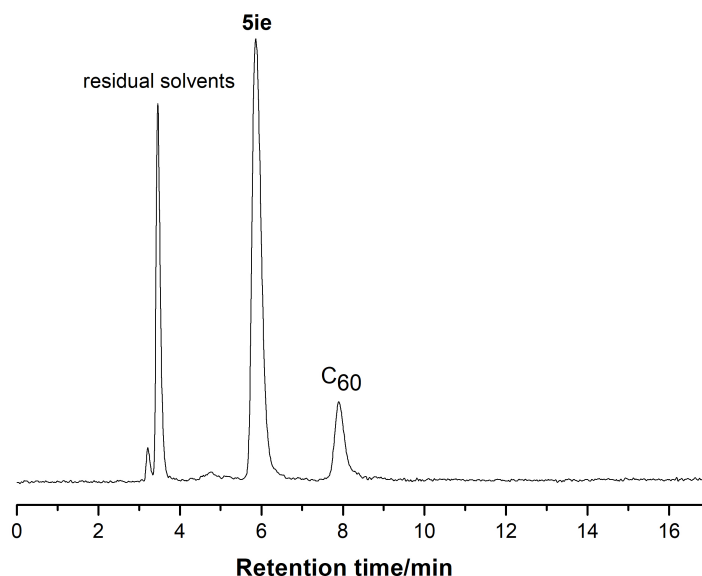

**Figure S7.** The HPLC profile of the reaction mixtures of toluene solution containing **5ie** monitored by HPLC. HPLC column: Cosmosil Buckyprep column (4.6 ×250 mm; toluene, 1 mL/min; 326 nm; 25 °C).

#### 4. Scale-up procedure for synthesis of **5ie**

**Scheme S1.** Scale-up synthesis of **5ie**

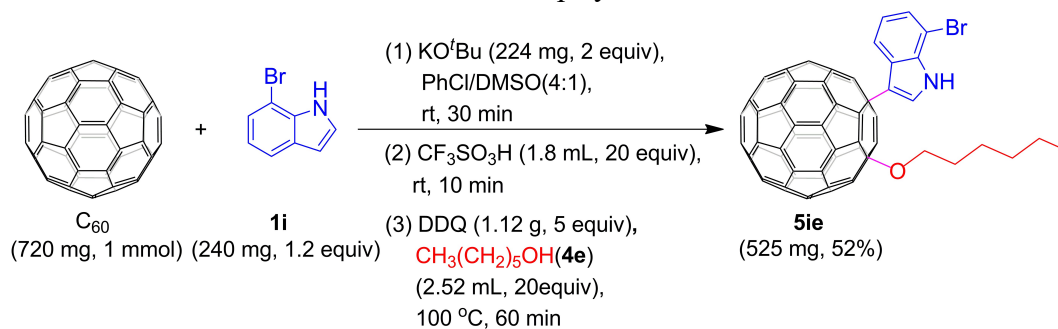

$\text{C}_{60}$  (720 mg, 1 mmol), 7-bromoindole (240 mg, 1.2 mmol), KO<sup>t</sup>Bu (224 mg, 2 mmol) were dissolved in chlorobenzene (160 mL) at room temperature under Ar atmosphere. Then DMSO (40 mL) was added to the mixture and the color of the solution changed gradually from purple to dark green. After being stirred for 30 minutes, CF<sub>3</sub>SO<sub>3</sub>H (1.8 mL, 20 mmol) was added to the mixture and the color changed from dark green to yellowish brown. And after being stirred for 10 minutes, DDQ (1.12 g, 5 mmol) and CH<sub>3</sub>(CH<sub>2</sub>)<sub>5</sub>OH (2.52 mL, 20 mmol) were added to the mixture and stirred in an oil bath at 100 °C for 60 minutes. The mixture was cooled to room temperature and then added 400 mL carbon disulfide. Resulting dark-yellow solution was washed with water and then evaporated in vacuo. The residue was separated on a silica gel column with carbon disulfide/dichloromethane (2:1) as the

eluent to give unreacted C<sub>60</sub> (166 mg, 23%) and **5ie** (525 mg, 52%) as black amorphous solid.

## 5. Experimental Procedures of Mechanism Studies

**Scheme S2.** Control experiment for the synthesis of **3g** and **5ga**

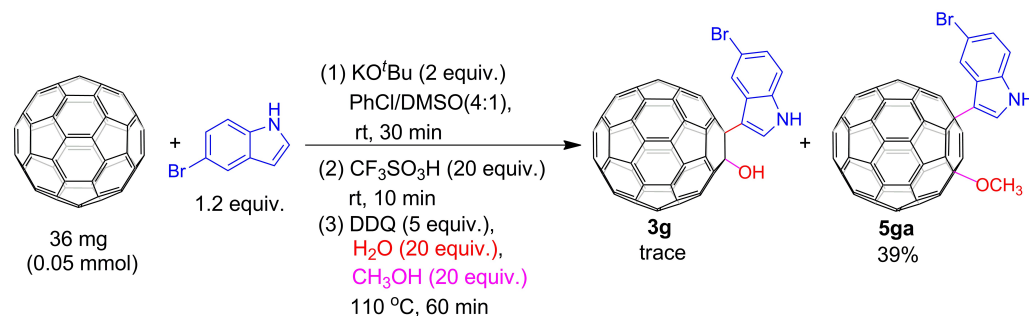

C<sub>60</sub> (36.0 mg, 0.05 mmol), 5-bromoindole (12 mg, 0.06 mmol), KO<sup>t</sup>Bu (11.2 mg, 0.1 mmol) were dissolved in chlorobenzene (8 mL) at room temperature under Ar atmosphere. Then DMSO (2 mL) was added to the mixture and the color of the solution changed gradually from purple to dark green. After being stirred for 30 minutes, CF<sub>3</sub>SO<sub>3</sub>H (90 µL, 1 mmol) was added to the mixture and the color changed from dark green to yellowish brown. And after being stirred for 10 minutes, DDQ (56 mg, 0.25 mmol), H<sub>2</sub>O (18 µL, 1 mmol) and CH<sub>3</sub>OH (40 µL, 1 mmol) were added to the mixture and stirred in an oil bath at 110 °C for 60 minutes. The mixture was cooled to room temperature and then added 20 mL carbon disulfide. Resulting dark-yellow solution was washed with water and then evaporated in vacuo. The residue was separated on a silica gel column with carbon disulfide/dichloromethane (2:1) as the eluent to give unreacted C<sub>60</sub> (1.5 mg, 4%) and **5ga** (18.3 mg, 39%) as black amorphous solid.

**Scheme S3.** Control experiment for the synthesis of **5ie**

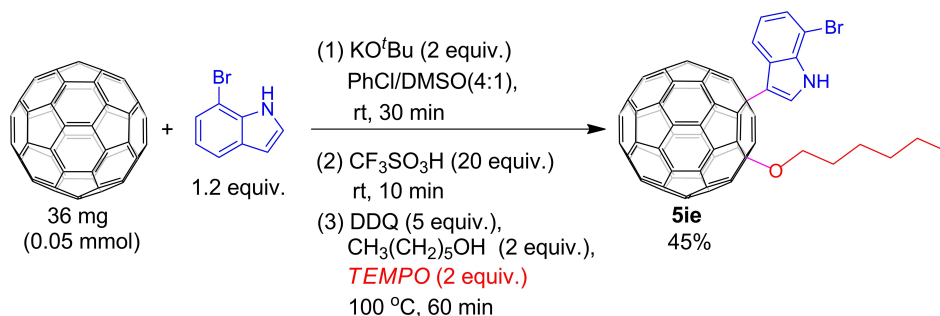

C<sub>60</sub> (36.0 mg, 0.05 mmol), 7-bromoindole (12 mg, 0.06 mmol), KO<sup>t</sup>Bu (11.2 mg, 0.1 mmol) were dissolved in chlorobenzene (8 mL) at room temperature under Ar atmosphere. Then DMSO (2 mL) was added to the mixture and the color of the solution changed gradually from purple to dark green. After being stirred for 30 minutes, CF<sub>3</sub>SO<sub>3</sub>H (90 µL, 1 mmol) was added to the mixture and the color changed from dark green to yellowish brown. And after being stirred for 10 minutes, DDQ (56 mg, 0.25 mmol), CH<sub>3</sub>(CH<sub>2</sub>)<sub>5</sub>OH (12.6 µL, 0.1 mmol) and TEMPO

(2,2,6,6-tetramethylpiperidine-1-oxyl) (15.6 mg, 0.1 mmol) were added to the mixture and stirred in an oil bath at 100 °C for 60 minutes. The mixture was cooled to room temperature and then added 20 mL carbon disulfide. Resulting dark-yellow solution was washed with water and then evaporated in vacuo. The residue was separated on a silica gel column with carbon disulfide/dichloromethane (2:1) as the eluent to give unreacted C<sub>60</sub> (3.8 mg, 11%) and **5ie** (22.7 mg, 45%) as black amorphous solid.

**Scheme S4.** Synthesis of **5ge** from 1,2-(hydro)[60]fulleroindole **6** through DDQ oxidization.

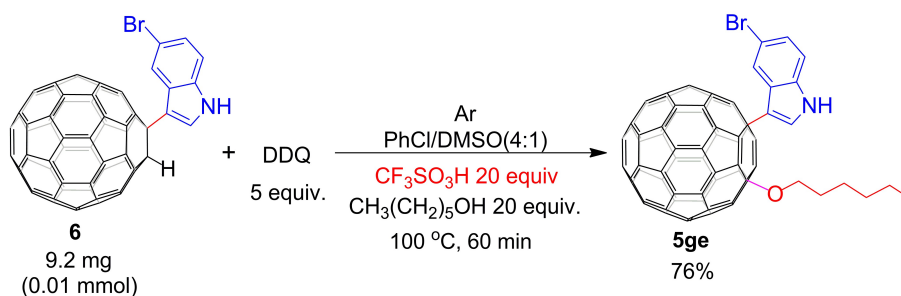

1,2-(Hydro)[60]fulleroindole **6** (9.2 mg, 0.01 mmol) and DDQ (11.5 mg, 0.05 mmol) were dissolved in chlorobenzene (2 mL) and DMSO (0.5 mL) at room temperature under Ar atmosphere. Then CF<sub>3</sub>SO<sub>3</sub>H (18 µL, 0.2 mmol) and CH<sub>3</sub>(CH<sub>2</sub>)<sub>5</sub>OH (25.2 µL, 0.2 mmol) were added to the mixture and stirred in an oil bath at 100 °C for 60 minutes. The mixture was cooled to room temperature and then added 10 mL carbon disulfide. Resulting yellow solution was washed with water and then evaporated in vacuo. The residue was separated on a silica gel column with carbon disulfide/dichloromethane (2:1) as the eluent to give **5ge** (7.7 mg, 76%) as black amorphous solid.

**Scheme S5.** Synthesis of **5ge** from 1,2-(hydro)[60]fulleroindole **6** through DDQ oxidization in air.

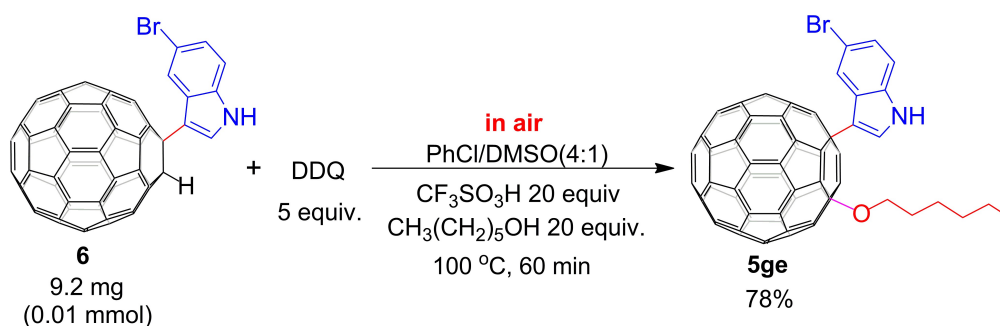

1,2-(Hydro)[60]fulleroindole **6** (9.2 mg, 0.01 mmol) and DDQ (11.5 mg, 0.05 mmol) were dissolved in chlorobenzene (2 mL) and DMSO (0.5 mL) at room temperature in air. Then CF<sub>3</sub>SO<sub>3</sub>H (18 µL, 0.2 mmol) and CH<sub>3</sub>(CH<sub>2</sub>)<sub>5</sub>OH (25.2 µL, 0.2 mmol) were added to the mixture and stirred in an oil bath in air at 100 °C for 60 minutes. The mixture was cooled to room temperature and then added 10 mL carbon disulfide. Resulting yellow solution was washed with water and then evaporated in vacuo. The residue was separated on a silica gel column with carbon

disulfide/dichloromethane (2:1) as the eluent to give **5ge** (8.0 mg, 78%) as black amorphous solid.

**Scheme S6.** Synthesis of **3g** from 1,2-(hydro)[60]fulleroindole **6** through DDQ oxidization in air.

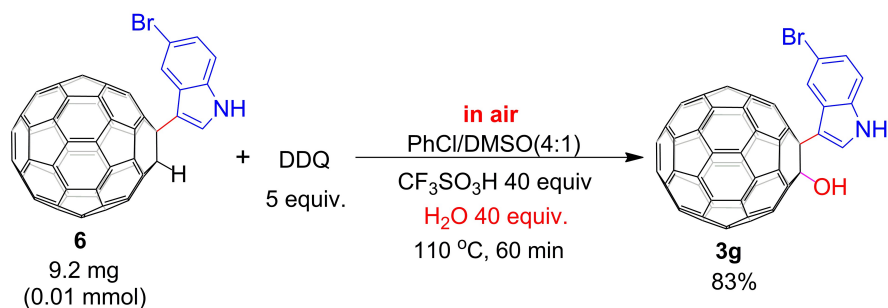

1,2-(Hydro)[60]fulleroindole **6** (9.2 mg, 0.01 mmol) and DDQ (11.5 mg, 0.05 mmol) were dissolved in chlorobenzene (2 mL) and DMSO (0.5 mL) at room temperature in air. Then CF<sub>3</sub>SO<sub>3</sub>H (36  $\mu$ L, 0.4 mmol) and H<sub>2</sub>O (9  $\mu$ L, 0.4 mmol) were added to the mixture and stirred in an oil bath in air at 110 °C for 60 minutes. The mixture was cooled to room temperature and then added 10 mL carbon disulfide. Resulting yellow solution was washed with water and then evaporated in vacuo. The residue was separated on a silica gel column with carbon disulfide/dichloromethane (1:1) as the eluent to give **3g** (7.8 mg, 83%) as black amorphous solid.
